# Supplementary material for: MEF2C Expression Is Regulated by the Post-transcriptional Activation of the METTL3-m6A-YTHDF1 Axis in Myoblast Differentiation
Source: Front Vet Sci. 2022 Apr 28;9:900924. doi: 10.3389/fvets.2022.900924 (PMC9096896; doi:10.3389/fvets.2022.900924)
Supplement: Supplementary file 4 [file Table_4.XLSX]

## Sheet: Sheet 1
Supplementary Table 4. Differentially expressed transcripts which show higher m6A enrichment in DM compared to GM.
geneId	transcriptId	log2(fc)	pval	qval	FPKM.DM_1_input	FPKM.DM_2_input	FPKM.DM_3_input	FPKM.GM_1_input	FPKM.GM_2_input	FPKM.GM_3_input
ENSBTAG00000020035	ENSBTAT00000037243	-0.0648324	0.903578	0.93841	38.8256	36.525	44.315	40.4601	41.8822	42.8235
ENSBTAG00000009188	ENSBTAT00000012108	0.190391	0.000554605	0.00186908	19.1056	18.088	19.1369	16.8055	17.0484	15.5123
ENSBTAG00000009187	ENSBTAT00000012106	0.301004	0.0181152	0.0411066	4.84382	5.21641	5.69032	4.66139	3.93159	4.19154
ENSBTAG00000003059	ENSBTAT00000003977	-0.246188	0.0084609	0.0211801	35.4732	35.572	35.3454	43.0182	40.9452	42.2232
ENSBTAG00000000201	ENSBTAT00000032432	0.138147	0.0513913	0.100468	9.93214	8.45063	10.7491	8.99761	9.76498	7.70909
ENSBTAG00000000648	ENSBTAT00000000849	-0.335629	0.00399352	0.0109238	3.99549	4.14923	4.07757	4.98695	5.23905	5.19765
ENSBTAG00000000706	ENSBTAT00000000944	-1.40277	4.13209e-50	1.94689e-48	3.19248	3.08616	3.5898	8.84594	8.47235	8.77477
ENSBTAG00000050914	ENSBTAT00000073027	-2.65106	2.52006e-19	3.81292e-18	0.037417	0.0584689	0.0574871	0.383061	0.342455	0.237863
ENSBTAG00000017753	ENSBTAT00000067940	0.143777	0.00418954	0.0114112	348.01	335.808	339.231	306.441	295.998	323.571
ENSBTAG00000001395	ENSBTAT00000001832	0.191182	0.0588564	0.112759	6.99152	7.87633	8.18864	7.1667	7.04126	5.98694
ENSBTAG00000047293	ENSBTAT00000065805	-0.0669812	0.891988	0.930091	11.0867	10.6492	11.6576	11.0841	12.3215	11.5749
ENSBTAG00000012908	ENSBTAT00000017155	0.103685	0.0327854	0.0682782	38.2794	34.9795	39.9671	35.7841	36.3664	33.2237
ENSBTAG00000046755	ENSBTAT00000064983	-2.05667	1	1	0.079108	0	0.138642	0.188189	0.248175	0.469532
ENSBTAG00000023675	ENSBTAT00000084938	0.13549	0.143152	0.234364	4.73501	3.39024	4.55841	3.49985	4.24567	3.80118
ENSBTAG00000023675	ENSBTAT00000084938	0.13549	0.143152	0.234364	4.73501	3.39024	4.55841	3.49985	4.24567	3.80118
ENSBTAG00000007970	ENSBTAT00000010480	-0.0905463	0.711581	0.798899	11.9028	11.7047	11.8516	12.7753	12.5374	12.4432
ENSBTAG00000015728	ENSBTAT00000020876	-0.166458	0.344067	0.467996	5.06415	4.10215	4.78228	5.53563	5.25818	4.86067
ENSBTAG00000015728	ENSBTAT00000020876	-0.166458	0.344067	0.467996	5.06415	4.10215	4.78228	5.53563	5.25818	4.86067
ENSBTAG00000047147	ENSBTAT00000032404	0.0402567	0.241528	0.356226	4.06126	3.7604	4.0895	3.67881	4.18282	3.72176
ENSBTAG00000047147	ENSBTAT00000063463	0.0402567	0.241528	0.356226	4.06126	3.7604	4.0895	3.67881	4.18282	3.72176
ENSBTAG00000047147	ENSBTAT00000063463	0.0402567	0.241528	0.356226	4.06126	3.7604	4.0895	3.67881	4.18282	3.72176
ENSBTAG00000047147	ENSBTAT00000063463	0.0402567	0.241528	0.356226	4.06126	3.7604	4.0895	3.67881	4.18282	3.72176
ENSBTAG00000024027	ENSBTAT00000033093	-0.00638308	0.673642	0.770801	7.87669	6.90895	8.29554	8.00136	8.29468	6.88748
ENSBTAG00000013465	ENSBTAT00000078164	0.110053	0.104197	0.180508	4.87561	4.56571	4.98315	4.39249	4.84258	4.12999
ENSBTAG00000013465	ENSBTAT00000078164	0.110053	0.104197	0.180508	4.87561	4.56571	4.98315	4.39249	4.84258	4.12999
ENSBTAG00000013769	ENSBTAT00000032332	0.19608	0.000420178	0.00145892	24.3383	24.4469	25.3938	21.6222	22.041	21.0892
ENSBTAG00000001209	ENSBTAT00000001599	0.0842983	0.0468217	0.0927582	54.2107	52.0106	54.4649	52.0854	52.7621	46.7187
ENSBTAG00000001209	ENSBTAT00000068005	0.0842983	0.0468217	0.0927582	54.2107	52.0106	54.4649	52.0854	52.7621	46.7187
ENSBTAG00000033319	ENSBTAT00000027169	-0.672131	6.30984e-09	4.3855e-08	14.8726	12.4263	14.2985	22.7735	20.4631	23.0458
ENSBTAG00000009085	ENSBTAT00000011977	0.0394021	0.23244	0.345252	16.781	15.8902	17.0577	16.6918	17.2264	14.4709
ENSBTAG00000009085	ENSBTAT00000011977	0.0394021	0.23244	0.345252	16.781	15.8902	17.0577	16.6918	17.2264	14.4709
ENSBTAG00000013909	ENSBTAT00000018474	1.66734	9.21403e-59	5.49048e-57	3.8302	3.98852	4.24226	1.28683	1.30642	1.20396
ENSBTAG00000000210	ENSBTAT00000071475	0.0706429	0.0916562	0.162724	16.8587	17.2481	16.7645	16.9948	15.0994	16.3462
ENSBTAG00000008562	ENSBTAT00000011287	0.0103974	0.516572	0.636215	7.00128	6.01932	6.53099	6.4039	6.42109	6.58621
ENSBTAG00000001293	ENSBTAT00000001703	-0.322857	0.236296	0.34991	0.338999	0.321198	0.320344	0.37453	0.459417	0.392519
ENSBTAG00000045436	ENSBTAT00000062869	-2.16453	1	1	0	0	0.030736	0	0	0.137796
ENSBTAG00000009933	ENSBTAT00000013108	-0.271624	0.062374	0.118361	3.33538	2.6721	3.05798	3.64459	3.77359	3.52534
ENSBTAG00000016656	ENSBTAT00000069492	-0.296293	0.0104083	0.0254217	10.0917	9.71689	12.1049	13.4896	14.0462	11.6535
ENSBTAG00000016656	ENSBTAT00000022152	-0.296293	0.0104083	0.0254217	10.0917	9.71689	12.1049	13.4896	14.0462	11.6535
ENSBTAG00000016656	ENSBTAT00000022152	-0.296293	0.0104083	0.0254217	10.0917	9.71689	12.1049	13.4896	14.0462	11.6535
ENSBTAG00000005066	ENSBTAT00000076030	-0.14633	0.637671	0.741065	1.95975	1.42792	1.52343	1.80268	1.64704	1.98565
ENSBTAG00000014797	ENSBTAT00000019691	-0.1951	0.222656	0.333655	5.61859	5.45131	6.38247	6.4415	6.67402	6.86401
ENSBTAG00000013727	ENSBTAT00000018248	-0.470268	8.15578e-06	3.82196e-05	7.8967	6.95913	8.15157	10.9604	10.4679	10.4453
ENSBTAG00000006388	ENSBTAT00000050590	0.106765	0.33785	0.461191	3.45562	2.44859	2.62189	2.76661	2.53055	2.62075
ENSBTAG00000047856	ENSBTAT00000082239	-0.183914	0.222215	0.33324	21.9357	20.2353	23.3078	26.2923	28.1236	19.9654
ENSBTAG00000047856	ENSBTAT00000082239	-0.183914	0.222215	0.33324	21.9357	20.2353	23.3078	26.2923	28.1236	19.9654
ENSBTAG00000032674	ENSBTAT00000080821	0.0748382	0.148186	0.240983	10.7774	9.80353	10.8663	9.75541	10.7622	9.33991
ENSBTAG00000006724	ENSBTAT00000001128	0.109795	0.0299526	0.063103	40.8943	40.7197	46.1582	39.3256	40.4581	38.6253
ENSBTAG00000014564	ENSBTAT00000019358	-0.0491764	0.949888	0.969142	5.90892	5.83345	5.77081	5.9048	6.26794	5.94771
ENSBTAG00000002394	ENSBTAT00000032260	-0.116412	0.601403	0.709841	2.7477	2.61827	3.00318	3.01865	3.05392	2.99988
ENSBTAG00000005430	ENSBTAT00000007148	0.714997	1.69765e-07	1.00275e-06	4.69594	5.3326	4.88667	2.96334	2.83392	3.28918
ENSBTAG00000003143	ENSBTAT00000004087	0.00374935	0.555741	0.669865	5.49833	5.74682	5.80182	5.70223	5.90257	5.39793
ENSBTAG00000019014	ENSBTAT00000025309	-0.377095	0.00177227	0.00532076	8.39889	8.90529	8.3973	11.6022	10.4952	11.2817
ENSBTAG00000012797	ENSBTAT00000073816	-0.0276526	0.767617	0.841099	10.1457	8.63179	10.1172	10.5299	9.92405	8.99996
ENSBTAG00000012797	ENSBTAT00000017002	-0.0276526	0.767617	0.841099	10.1457	8.63179	10.1172	10.5299	9.92405	8.99996
ENSBTAG00000054926	ENSBTAT00000069220	-0.276537	0.316603	0.439132	9.04862	8.73462	9.54378	11.9428	13.4826	7.67539
ENSBTAG00000020073	ENSBTAT00000026745	0.0743832	0.258995	0.376056	2.35536	2.70661	2.54429	2.54553	2.49732	2.18118
ENSBTAG00000011742	ENSBTAT00000015600	-0.151464	0.234928	0.348224	29.6953	28.3186	29.3358	31.5597	35.6297	29.8296
ENSBTAG00000013141	ENSBTAT00000017467	-0.674294	0.000212111	0.000783	0.97514	0.884979	0.968655	1.45754	1.45297	1.6037
ENSBTAG00000005871	ENSBTAT00000070527	-0.00795714	0.763631	0.838016	1.7387	1.33713	1.49289	1.43011	1.60851	1.55536
ENSBTAG00000011139	ENSBTAT00000014794	-1.41698	4.43791e-52	2.2215e-50	5.55678	6.0554	5.61813	16.3937	15.3571	14.2587
ENSBTAG00000046104	ENSBTAT00000064763	-0.452736	0.000328981	0.00116524	15.7726	14.5327	17.0359	23.7542	22.3099	18.7286
ENSBTAG00000017416	ENSBTAT00000023150	0.0102827	0.367252	0.491773	33.5501	31.5013	32.7582	32.9649	34.0509	30.099
ENSBTAG00000008078	ENSBTAT00000010623	-0.81244	4.37226e-07	2.46518e-06	3.7752	3.34318	3.90103	6.68476	7.07996	5.58732
ENSBTAG00000009336	ENSBTAT00000044711	-0.580165	2.77467e-07	1.6008e-06	12.7641	14.9895	13.2538	20.7667	19.1196	21.4205
ENSBTAG00000003851	ENSBTAT00000005025	0.0974367	0.0734836	0.135302	14.7091	16.2171	17.5126	16.1746	14.7655	14.3352
ENSBTAG00000014318	ENSBTAT00000019041	-0.313439	0.0109918	0.0267125	17.6647	15.4807	18.8907	23.3808	23.1942	18.0884
ENSBTAG00000006142	ENSBTAT00000008082	0.163189	0.00283878	0.00806497	18.7458	17.7701	19.6315	16.4204	17.3791	16.3429
ENSBTAG00000006142	ENSBTAT00000008082	0.163189	0.00283878	0.00806497	18.7458	17.7701	19.6315	16.4204	17.3791	16.3429
ENSBTAG00000023445	ENSBTAT00000044404	-0.112553	0.595614	0.704513	7.43269	7.07966	7.1688	6.84352	8.54448	8.05236
ENSBTAG00000015163	ENSBTAT00000020168	0.00928013	0.464125	0.587026	54.487	49.4649	60.0189	55.9104	59.0687	47.9405
ENSBTAG00000031178	ENSBTAT00000044136	-0.675418	2.45846e-09	1.78205e-08	3.2851	2.72	3.05517	4.81205	4.95831	4.69945
ENSBTAG00000018138	ENSBTAT00000024143	0.262044	0.0493847	0.0970326	1.8768	1.4836	1.65639	1.35452	1.37076	1.45825
ENSBTAG00000006222	ENSBTAT00000076561	0.451678	7.48192e-06	3.53754e-05	10.7596	10.0227	11.4362	8.19726	8.52482	6.83575
ENSBTAG00000014843	ENSBTAT00000085263	-0.187011	0.0587727	0.112652	63.6108	59.7251	65.8797	73.5358	72.9361	68.9316
ENSBTAG00000006909	ENSBTAT00000009083	0.317699	0.0597264	0.114228	0.683933	0.697632	0.706924	0.6341	0.601054	0.440542
ENSBTAG00000019949	ENSBTAT00000026574	-0.118831	0.54769	0.663582	5.06426	4.86408	4.66741	5.41092	5.01763	5.42031
ENSBTAG00000015198	ENSBTAT00000020222	-0.0639558	0.969737	0.98232	2.29857	2.3829	2.35053	2.17589	3.00969	2.16517
ENSBTAG00000000750	ENSBTAT00000000991	-0.3164	0.0297107	0.0627065	4.46802	4.87118	4.67721	6.08329	6.01177	5.35844
ENSBTAG00000014461	ENSBTAT00000019228	-0.444507	0.00724211	0.0184444	12.2977	10.0031	10.5763	16.3256	11.9402	16.4749
ENSBTAG00000000742	ENSBTAT00000074081	-0.0683935	0.866109	0.911638	31.0243	33.5409	33.1014	32.8694	35.1442	34.3946
ENSBTAG00000016999	ENSBTAT00000022607	-0.042101	0.839464	0.893879	48.0881	48.7946	47.1061	51.5068	49.6797	47.0661
ENSBTAG00000030942	ENSBTAT00000067478	-0.531788	2.89426e-10	2.33152e-09	32.1897	30.4964	29.7548	44.4644	46.5701	42.6093
ENSBTAG00000020456	ENSBTAT00000087371	0.0573647	0.216717	0.326769	10.4698	10.1016	10.1481	10.0308	10.503	8.98823
ENSBTAG00000017882	ENSBTAT00000023769	0.43035	0.000294598	0.00105576	4.8306	5.53453	5.97398	4.0918	4.26688	3.76628
ENSBTAG00000030670	ENSBTAT00000029328	-0.454878	2.24705e-05	9.80796e-05	2.0038	1.80314	1.8007	2.54826	2.65074	2.4872
ENSBTAG00000018688	ENSBTAT00000024873	-0.266491	0.162615	0.259894	3.60831	4.09024	4.03453	4.98121	4.13001	5.00226
ENSBTAG00000011876	ENSBTAT00000015758	-0.0169756	0.67014	0.768005	8.42436	7.91593	8.64519	8.57148	8.87788	7.83185
ENSBTAG00000001771	ENSBTAT00000002319	0.460707	3.86911e-09	2.74074e-08	22.9184	20.7233	22.2508	16.873	17.3201	13.6864
ENSBTAG00000001771	ENSBTAT00000072702	0.460707	3.86911e-09	2.74074e-08	22.9184	20.7233	22.2508	16.873	17.3201	13.6864
ENSBTAG00000020787	ENSBTAT00000084643	0.341341	2.10647e-08	1.38263e-07	19.1886	18.0313	18.55	15.3372	14.569	14.1134
ENSBTAG00000019129	ENSBTAT00000025464	-0.578084	0.0125416	0.0298918	0.527986	0.643686	0.646601	0.953616	0.799727	0.961095
ENSBTAG00000008240	ENSBTAT00000010847	-0.0370835	0.938546	0.961611	0.997059	0.901076	1.10115	0.933155	0.896686	1.24754
ENSBTAG00000000746	ENSBTAT00000077399	0.18291	0.00509876	0.0135417	21.6447	20.5652	22.358	18.8968	21.3178	16.6649
ENSBTAG00000011528	ENSBTAT00000015319	-0.218599	0.274675	0.393457	13.8277	12.8204	15.7751	14.6372	15.3937	19.3328
ENSBTAG00000012594	ENSBTAT00000081747	0.083921	0.0903817	0.160673	27.5194	31.0961	29.2059	27.0888	27.2688	28.501
ENSBTAG00000008482	ENSBTAT00000011175	-0.0600298	0.950162	0.969299	30.8503	29.7029	32.2874	31.7702	32.9589	32.056
ENSBTAG00000008482	ENSBTAT00000011175	-0.0600298	0.950162	0.969299	30.8503	29.7029	32.2874	31.7702	32.9589	32.056
ENSBTAG00000012899	ENSBTAT00000066996	0.154006	0.00248141	0.00715975	69.1724	66.4831	66.0218	61.0392	60.3846	59.834
ENSBTAG00000021819	ENSBTAT00000029080	-0.44529	1.02851e-06	5.48358e-06	16.7763	15.4311	17.5137	22.565	24.2475	20.8872
ENSBTAG00000021819	ENSBTAT00000029080	-0.44529	1.02851e-06	5.48358e-06	16.7763	15.4311	17.5137	22.565	24.2475	20.8872
ENSBTAG00000004139	ENSBTAT00000005416	0.38727	1.19475e-07	7.17556e-07	23.6849	24.4148	28.7807	20.0035	20.2122	18.5652
ENSBTAG00000020122	ENSBTAT00000026801	-0.116669	0.441237	0.564843	27.3598	25.5998	28.9988	30.7435	31.1827	26.9354
ENSBTAG00000020122	ENSBTAT00000026801	-0.116669	0.441237	0.564843	27.3598	25.5998	28.9988	30.7435	31.1827	26.9354
ENSBTAG00000019043	ENSBTAT00000025345	-0.319285	0.00487992	0.0130117	15.5706	12.7132	14.8851	18.7507	18.3977	16.714
ENSBTAG00000000603	ENSBTAT00000080737	0.988034	1.90448e-46	8.32765e-45	16.5737	15.5794	16.643	8.30716	8.43797	7.85612
ENSBTAG00000019314	ENSBTAT00000025716	0.267393	3.5347e-05	0.000150132	17.5142	17.2478	18.9558	14.9446	15.8982	13.7869
ENSBTAG00000026156	ENSBTAT00000037060	0.14538	0.0125435	0.0298918	68.524	71.6898	74.5336	59.3486	64.5698	70.2437
ENSBTAG00000023675	ENSBTAT00000084938	0.13549	0.143152	0.234364	4.73501	3.39024	4.55841	3.49985	4.24567	3.80118
ENSBTAG00000004124	ENSBTAT00000005398	0.0707491	0.220323	0.330893	7.90684	7.54313	7.49782	7.77917	7.47744	6.59298
ENSBTAG00000014889	ENSBTAT00000019822	-0.845818	3.19681e-28	7.31836e-27	55.6279	59.5174	57.5138	101.829	109.368	99.1198
ENSBTAG00000013663	ENSBTAT00000018160	0.241468	0.0357854	0.0737425	6.73931	6.42672	5.48468	5.62314	5.09206	5.06114
ENSBTAG00000015662	ENSBTAT00000020801	-0.240994	0.501215	0.622156	0.257209	0.35522	0.543299	0.38011	0.465864	0.519873
ENSBTAG00000015662	ENSBTAT00000020801	-0.240994	0.501215	0.622156	0.257209	0.35522	0.543299	0.38011	0.465864	0.519873
ENSBTAG00000013460	ENSBTAT00000017903	-0.247032	0.0402008	0.0815964	5.31153	4.65002	5.34905	6.21611	6.09203	5.8619
ENSBTAG00000013460	ENSBTAT00000017903	-0.247032	0.0402008	0.0815964	5.31153	4.65002	5.34905	6.21611	6.09203	5.8619
ENSBTAG00000013461	ENSBTAT00000017905	-0.630864	2.60631e-16	3.31058e-15	380.43	392.571	390.614	604.89	577.91	619.048
ENSBTAG00000013057	ENSBTAT00000078595	-0.183926	0.0668895	0.1252	18.0854	17.2705	18.2689	19.934	21.2615	19.7208
ENSBTAG00000009084	ENSBTAT00000011976	0.0988728	0.0569242	0.109628	43.8455	42.3934	38.5171	37.8735	37.7176	40.9014
ENSBTAG00000005723	ENSBTAT00000007523	-0.0447447	0.934784	0.959733	6.97173	6.68712	8.92541	7.96698	8.66422	6.66448
ENSBTAG00000013937	ENSBTAT00000057527	-0.177635	0.293523	0.413995	3.20678	3.23994	3.52996	4.03052	3.83067	3.42272
ENSBTAG00000021000	ENSBTAT00000027966	0.0243921	0.35597	0.480228	3.39293	3.42105	3.3877	3.40437	3.53212	3.09416
ENSBTAG00000001390	ENSBTAT00000047259	0.284671	9.40294e-07	5.042e-06	54.3695	55.6659	56.9677	46.404	44.8421	45.8516
ENSBTAG00000000213	ENSBTAT00000000254	0.0501421	0.264868	0.382736	15.274	13.3742	14.3979	12.5801	14.1281	14.8676
ENSBTAG00000002182	ENSBTAT00000002828	-0.81856	7.38777e-08	4.55404e-07	44.591	43.0554	45.9039	65.4987	68.6694	101.367
ENSBTAG00000048057	ENSBTAT00000073437	-0.0327638	0.75248	0.829442	32.0784	30.8905	32.1723	33.7964	33.9294	29.6008
ENSBTAG00000033170	ENSBTAT00000047119	0.00571179	0.626748	0.732304	6.16094	5.86881	6.93497	6.31522	7.00922	5.56535
ENSBTAG00000008862	ENSBTAT00000069890	0.256227	3.07876e-05	0.000131502	18.0623	16.7749	17.4753	15.1062	15.4258	13.2679
ENSBTAG00000013069	ENSBTAT00000017379	-0.0620515	0.969736	0.98232	4.89272	5.05584	5.47657	5.40416	6.11629	4.58261
ENSBTAG00000054520	ENSBTAT00000072634	-0.203071	0.121063	0.204111	7.35867	7.85403	7.28843	9.21679	8.09353	8.59178
ENSBTAG00000054326	ENSBTAT00000071769	0.166793	0.309662	0.431581	2.92265	2.761	2.19785	2.46727	2.81382	1.7399
ENSBTAG00000005066	ENSBTAT00000076030	-0.14633	0.637671	0.741065	1.95975	1.42792	1.52343	1.80268	1.64704	1.98565
ENSBTAG00000000566	ENSBTAT00000000740	-0.201382	0.251102	0.367449	1.95314	1.73705	1.97978	2.20532	2.39678	1.91724
ENSBTAG00000013755	ENSBTAT00000018278	0.746909	1.92581e-28	4.43373e-27	57.6855	58.8787	57.2721	32.8511	34.4778	36.2564
ENSBTAG00000021396	ENSBTAT00000028521	-0.165452	0.237913	0.351962	6.08962	6.3613	5.48225	6.69097	6.41984	7.00156
ENSBTAG00000050482	ENSBTAT00000070820	0.171828	0.0135669	0.0320106	12.3785	10.9393	11.9673	10.5999	11.2479	9.47544
ENSBTAG00000006471	ENSBTAT00000008486	0.0384819	0.298251	0.418847	6.44309	6.00558	6.84841	6.29016	6.69805	5.80093
ENSBTAG00000021364	ENSBTAT00000028482	-0.293694	0.00908088	0.0225669	4.21753	4.11914	4.00169	5.0527	4.77063	5.30073
ENSBTAG00000007577	ENSBTAT00000009970	-0.360762	0.00123494	0.00382924	14.5871	11.9108	14.3718	18.3283	16.8512	17.3014
ENSBTAG00000013317	ENSBTAT00000017712	0.744963	0.000347115	0.00122483	5.18965	5.02677	4.87725	4.63079	2.36955	2.00579
ENSBTAG00000013192	ENSBTAT00000017558	-0.0767411	0.90533	0.93917	2.55692	2.92531	2.90662	3.23568	3.13082	2.48066
ENSBTAG00000013192	ENSBTAT00000017558	-0.0767411	0.90533	0.93917	2.55692	2.92531	2.90662	3.23568	3.13082	2.48066
ENSBTAG00000000448	ENSBTAT00000000573	-0.27871	0.251961	0.368262	2.00249	1.58545	1.7756	2.06749	1.79701	2.64207
ENSBTAG00000003151	ENSBTAT00000004094	-0.467743	5.77432e-09	4.02481e-08	39.7008	40.8974	38.8905	56.2396	55.8211	53.1856
ENSBTAG00000001749	ENSBTAT00000002296	-0.121848	0.426169	0.549949	14.9465	14.1432	14.8814	17.178	16.0178	14.6504
ENSBTAG00000001749	ENSBTAT00000002296	-0.121848	0.426169	0.549949	14.9465	14.1432	14.8814	17.178	16.0178	14.6504
ENSBTAG00000040199	ENSBTAT00000000606	-0.0748588	0.853978	0.903146	9.68097	9.61762	8.51963	9.26414	9.1268	10.9088
ENSBTAG00000006920	ENSBTAT00000009087	-0.0529937	0.966493	0.980787	15.5712	15.745	16.1002	16.5721	16.6999	15.9185
ENSBTAG00000014451	ENSBTAT00000019219	0.0560164	0.132472	0.220141	8.82596	8.10706	8.91803	8.53361	8.09843	8.23451
ENSBTAG00000017450	ENSBTAT00000023192	0.405988	4.75945e-05	0.000197595	7.50214	7.0566	7.25864	4.77207	6.2239	5.47003
ENSBTAG00000017450	ENSBTAT00000023192	0.405988	4.75945e-05	0.000197595	7.50214	7.0566	7.25864	4.77207	6.2239	5.47003
ENSBTAG00000010397	ENSBTAT00000052404	-0.410348	0.0116289	0.028009	2.22032	2.33057	2.39367	3.43654	3.19269	2.60013
ENSBTAG00000016457	ENSBTAT00000016666	-0.0411181	0.830316	0.887521	66.7849	63.7438	66.404	70.2732	69.3495	63.0035
ENSBTAG00000001968	ENSBTAT00000002554	-0.276572	0.0183636	0.0415771	12.244	10.8505	12.9736	15.225	15.8204	12.6444
ENSBTAG00000037393	ENSBTAT00000048967	-0.278671	0.0305373	0.0642122	12.2011	10.5779	12.7575	14.7317	15.1359	13.241
ENSBTAG00000009232	ENSBTAT00000012168	0.508025	1.51705e-14	1.71547e-13	22.1612	22.0603	23.5974	15.6701	16.9327	15.0864
ENSBTAG00000019376	ENSBTAT00000025816	0.627791	1.29955e-20	2.1176e-19	66.6182	65.6589	67.6837	43.8839	46.1525	39.3717
ENSBTAG00000004154	ENSBTAT00000005438	0.174374	0.0136117	0.0320914	17.5746	18.083	18.3624	16.4967	17.9368	13.4364
ENSBTAG00000039442	ENSBTAT00000009720	0.0368676	0.233236	0.346265	49.5079	50.0624	50.2862	51.7362	51.249	43.0902
ENSBTAG00000013142	ENSBTAT00000044888	0.0762775	0.221022	0.331614	9.5513	7.8573	9.12747	8.72313	9.38934	7.05704
ENSBTAG00000013142	ENSBTAT00000044888	0.0762775	0.221022	0.331614	9.5513	7.8573	9.12747	8.72313	9.38934	7.05704
ENSBTAG00000014960	ENSBTAT00000067223	-0.228852	0.0452404	0.0902309	7.45959	6.98363	7.21382	7.77052	9.07458	8.53483
ENSBTAG00000031561	ENSBTAT00000044707	-0.686741	6.22049e-11	5.34768e-10	13.3389	13.9657	12.3208	23.643	20.2756	19.8642
ENSBTAG00000009012	ENSBTAT00000011863	3.06343	4.67235e-34	1.35231e-32	2.3293	2.7326	2.75927	0.433976	0.195855	0.30576
ENSBTAG00000012120	ENSBTAT00000016071	0.0693959	0.149602	0.242831	18.1682	15.6902	17.6339	17.2791	17.3454	14.4495
ENSBTAG00000013013	ENSBTAT00000069914	-0.0765137	0.80782	0.871405	35.2755	34.7129	35.8864	38.4756	40.2615	32.9044
ENSBTAG00000055257	ENSBTAT00000083623	-0.651163	1.71402e-11	1.55027e-10	5.44304	5.74864	5.79169	8.85662	9.59643	8.21819
ENSBTAG00000001465	ENSBTAT00000001919	-0.855724	1.26067e-06	6.62549e-06	1.69599	1.48881	1.68035	3.04719	2.89294	2.86416
ENSBTAG00000033740	ENSBTAT00000033854	-0.594507	0.00356477	0.00986417	6.33338	7.24628	6.09856	10.7736	9.97251	8.96715
ENSBTAG00000004564	ENSBTAT00000077550	0.0798057	0.277224	0.395935	20.4878	20.2823	25.9466	25.5664	20.2741	17.2858
ENSBTAG00000018402	ENSBTAT00000024485	-0.103981	0.520261	0.639787	18.1571	17.9881	19.1025	19.2062	21.3838	18.7868
ENSBTAG00000007933	ENSBTAT00000010430	-0.588051	9.23017e-09	6.31057e-08	7.65491	6.91553	8.20195	11.7046	12.4289	10.0983
ENSBTAG00000002185	ENSBTAT00000002831	-0.188811	0.225974	0.337544	15.4071	13.5633	16.4417	15.8109	19.2665	16.6844
ENSBTAG00000015413	ENSBTAT00000044150	-0.0801872	0.832734	0.88918	5.02646	4.65037	5.14558	5.23473	5.78219	4.65267
ENSBTAG00000040061	ENSBTAT00000052575	-0.11826	0.434017	0.55812	8.10065	7.83046	7.49593	8.74109	8.6854	8.00181
ENSBTAG00000050763	ENSBTAT00000018647	0.310502	0.00168725	0.00508435	2.63603	2.48054	2.30116	1.9318	2.14187	1.90771
ENSBTAG00000009115	ENSBTAT00000012013	-0.995321	2.96431e-11	2.63215e-10	1.90251	1.88627	1.57158	3.40189	3.36068	3.92344
ENSBTAG00000015310	ENSBTAT00000020353	0.0173283	0.335804	0.459171	28.1222	25.8767	28.8567	26.3005	29.3706	26.1952
ENSBTAG00000001497	ENSBTAT00000052818	-0.0954358	0.56371	0.677282	22.7942	22.4503	22.7001	23.9465	24.9066	23.7381
ENSBTAG00000019952	ENSBTAT00000070152	0.0460149	0.249625	0.365684	5.0252	5.10768	5.02216	5.04853	5.11434	4.51642
ENSBTAG00000018427	ENSBTAT00000024518	0.176571	0.00435547	0.0117947	23.6838	24.4347	25.114	21.4484	23.3137	20.0342
ENSBTAG00000023416	ENSBTAT00000031908	0.0712475	0.24709	0.362844	4.48675	3.57372	4.77367	3.93508	4.54172	3.73892
ENSBTAG00000023416	ENSBTAT00000069850	0.0712475	0.24709	0.362844	4.48675	3.57372	4.77367	3.93508	4.54172	3.73892
ENSBTAG00000007014	ENSBTAT00000085483	-0.199792	0.192779	0.297691	4.7619	4.86051	4.47458	5.56068	5.55869	5.0715
ENSBTAG00000044075	ENSBTAT00000061601	-0.0200407	0.645465	0.747549	26.5451	24.9756	28.6132	27.9752	28.1533	25.1263
ENSBTAG00000035556	ENSBTAT00000023484	0.0652086	0.100767	0.175767	214.261	189.725	217.737	203.235	204.492	186.521
ENSBTAG00000019577	ENSBTAT00000026082	6.13187	3.85676e-38	1.29869e-36	0.587629	1.09336	0.82937	0.013918	0.02188	0
ENSBTAG00000002966	ENSBTAT00000003865	-0.0769548	0.795962	0.862825	14.6578	14.3212	15.8839	16.0212	17.0413	14.2583
ENSBTAG00000013602	ENSBTAT00000018087	0.228116	0.000213192	0.000786515	8.03916	7.38804	8.50213	6.65382	7.24995	6.52586
ENSBTAG00000023106	ENSBTAT00000030356	-0.292506	0.0139311	0.032743	19.385	20.5022	18.9529	24.9268	21.9901	25.1484
ENSBTAG00000021253	ENSBTAT00000069342	-0.363466	0.0286612	0.0608313	1.02353	0.873729	0.853376	1.17542	1.14341	1.2199
ENSBTAG00000011645	ENSBTAT00000068582	-0.368583	0.000346605	0.00122338	57.4299	57.1334	56.7351	68.9172	69.3907	82.8528
ENSBTAG00000011437	ENSBTAT00000015200	0.192658	0.00135426	0.00416874	14.9855	15.3209	15.9113	13.4024	14.5974	12.4403
ENSBTAG00000014880	ENSBTAT00000077110	0.258641	0.000612133	0.00204425	7.14178	7.79062	7.2811	5.72319	6.32954	6.51498
ENSBTAG00000014880	ENSBTAT00000077110	0.258641	0.000612133	0.00204425	7.14178	7.79062	7.2811	5.72319	6.32954	6.51498
ENSBTAG00000018936	ENSBTAT00000054230	1.14556	4.01613e-31	1.03652e-29	7.9799	8.31977	6.78022	3.43673	3.3293	3.66637
ENSBTAG00000003148	ENSBTAT00000004097	-0.0142951	0.54951	0.664966	14.1461	13.2951	13.747	13.7878	14.4623	13.3482
ENSBTAG00000043957	ENSBTAT00000061350	-1.3553	1	1	0.331764	0.406076	0.494999	0.954293	1.10809	1.09185
ENSBTAG00000033679	ENSBTAT00000057284	-0.141936	0.539627	0.656365	2.7237	2.41108	2.66978	3.05376	2.8819	2.67578
ENSBTAG00000004791	ENSBTAT00000050520	0.200158	0.00283068	0.00805094	9.61961	9.98298	9.3967	8.33991	8.22289	8.67978
ENSBTAG00000049122	ENSBTAT00000072186	0.679938	9.75768e-25	1.93498e-23	19.8858	21.2689	19.896	12.8007	12.4277	12.879
ENSBTAG00000049122	ENSBTAT00000072186	0.679938	9.75768e-25	1.93498e-23	19.8858	21.2689	19.896	12.8007	12.4277	12.879
ENSBTAG00000019202	ENSBTAT00000025560	-0.193945	0.0936014	0.165558	28.2723	29.2459	27.7221	30.5953	31.6009	35.3091
ENSBTAG00000024815	ENSBTAT00000034553	-0.843684	1.04649e-18	1.53267e-17	5.47107	5.40706	5.28552	9.15189	9.68098	10.1748
ENSBTAG00000003916	ENSBTAT00000072711	-0.0533858	0.972515	0.984173	20.0283	18.715	20.9723	20.7576	22.5323	18.6769
ENSBTAG00000021158	ENSBTAT00000028199	0.238384	0.111423	0.190688	0.989785	0.993585	0.869009	0.915505	0.810557	0.691884
ENSBTAG00000004061	ENSBTAT00000005303	-0.0290437	0.980196	0.989229	0.439341	0.346947	0.524617	0.348072	0.448685	0.540806
ENSBTAG00000049158	ENSBTAT00000005967	0.0542028	0.452095	0.574981	2.97742	2.30823	2.43362	2.28714	2.79514	2.35236
ENSBTAG00000016895	ENSBTAT00000022471	-0.263064	0.0170272	0.0389871	25.898	25.5333	30.3575	34.166	34.1831	29.7993
ENSBTAG00000050824	ENSBTAT00000075020	-0.129953	0.411725	0.535917	8.99292	10.4546	9.08005	10.1296	10.1793	10.9076
ENSBTAG00000008089	ENSBTAT00000079776	-0.207549	0.0395989	0.0805092	9.23362	9.10068	9.16439	10.263	11.2323	10.2581
ENSBTAG00000053244	ENSBTAT00000074897	-0.168379	0.189805	0.293919	11.9365	11.5123	12.3454	12.5588	13.7389	13.9275
ENSBTAG00000005987	ENSBTAT00000007859	-0.0355487	0.782917	0.852867	10.2859	11.0162	11.2878	11.3537	11.354	10.6954
ENSBTAG00000004216	ENSBTAT00000005525	0.336765	0.000696328	0.00228834	7.75851	6.55071	7.6889	5.79047	6.28275	5.34523
ENSBTAG00000010498	ENSBTAT00000048226	-0.907707	1.66234e-16	2.12709e-15	3.69373	3.29328	3.98052	6.77663	6.75901	7.04012
ENSBTAG00000027020	ENSBTAT00000038684	0.514989	1.41005e-16	1.81189e-15	999.494	949.74	999.158	728.572	679.161	655.547
ENSBTAG00000027020	ENSBTAT00000038684	0.514989	1.41005e-16	1.81189e-15	999.494	949.74	999.158	728.572	679.161	655.547
ENSBTAG00000008483	ENSBTAT00000011169	0.885509	2.53213e-14	2.81874e-13	5.3381	4.25649	5.37223	2.7354	3.05595	2.31013
ENSBTAG00000050322	ENSBTAT00000066374	0.0337543	0.63253	0.736639	2.23334	2.15614	2.15829	2.37383	2.02465	1.99786
ENSBTAG00000021726	ENSBTAT00000028962	-0.0241374	0.698149	0.789701	8.26311	8.30569	8.59454	8.73514	8.72348	8.12927
ENSBTAG00000027875	ENSBTAT00000073360	-0.293858	0.00676517	0.0173974	10.1249	8.25801	10.4939	12.006	12.1857	11.2087
ENSBTAG00000052709	ENSBTAT00000074598	2.61476	4.07687e-133	1.05443e-130	63.6986	46.5454	56.557	9.08997	9.54787	8.59411
ENSBTAG00000027694	ENSBTAT00000039896	-0.220267	0.1413	0.232034	4.24413	3.94057	4.28112	4.41251	5.33122	4.7783
ENSBTAG00000027696	ENSBTAT00000017865	-0.233282	0.411135	0.53555	0.551648	0.569926	0.610715	0.607075	0.750611	0.67863
ENSBTAG00000019255	ENSBTAT00000025637	0.372915	3.13513e-08	2.0175e-07	39.6288	43.1266	43.8192	34.0946	33.7076	29.9414
ENSBTAG00000021636	ENSBTAT00000078829	0.425622	0.000345111	0.00121846	4.25732	3.60112	4.26293	3.29675	3.27859	2.44923
ENSBTAG00000000176	ENSBTAT00000000201	-0.0849068	0.719155	0.80431	20.7693	19.9424	21.1731	22.583	23.2363	19.8169
ENSBTAG00000007898	ENSBTAT00000010387	0.091535	0.0707341	0.130994	18.8713	16.5826	18.5682	17.1382	17.7245	15.8383
ENSBTAG00000016430	ENSBTAT00000080267	0.0922159	0.311387	0.433389	4.91827	4.34842	4.60956	4.76227	5.01424	3.24054
ENSBTAG00000006918	ENSBTAT00000009090	0.356424	3.31651e-06	1.65123e-05	14.2601	13.5232	14.5575	10.9262	12.0721	10.074
ENSBTAG00000005501	ENSBTAT00000007231	0.0469533	0.198762	0.305301	16.8305	15.6828	16.8025	15.744	17.5983	14.3943
ENSBTAG00000011909	ENSBTAT00000015797	0.286328	4.4255e-07	2.49288e-06	40.0208	39.2405	40.909	32.4182	33.9705	32.1493
ENSBTAG00000048151	ENSBTAT00000064349	-0.00120236	0.484653	0.606927	39.8346	39.9804	42.6821	43.2208	43.071	36.3074
ENSBTAG00000006907	ENSBTAT00000061000	1.06997	9.27353e-41	3.41603e-39	42.6044	35.9562	45.2155	18.7517	20.3681	19.8384
ENSBTAG00000006907	ENSBTAT00000061000	1.06997	9.27353e-41	3.41603e-39	42.6044	35.9562	45.2155	18.7517	20.3681	19.8384
ENSBTAG00000032369	ENSBTAT00000045923	-0.203216	0.166844	0.265362	19.8044	20.7717	17.2658	25.3694	21.7273	19.4945
ENSBTAG00000016217	ENSBTAT00000021579	-0.259332	0.0773541	0.141274	3.36854	3.6211	3.9064	4.17537	4.422	4.44438
ENSBTAG00000039731	ENSBTAT00000045869	0.0471291	0.203443	0.310451	84.9858	85.9712	93.3638	88.9636	91.598	75.264
ENSBTAG00000012615	ENSBTAT00000061551	0.131689	0.00878754	0.0219211	43.3349	47.3233	44.9783	41.0844	40.8259	41.8936
ENSBTAG00000005238	ENSBTAT00000006893	2.56509	1.01372e-45	4.32378e-44	1.37323	1.41575	1.35933	0.203708	0.200455	0.296811
ENSBTAG00000005234	ENSBTAT00000006890	-1.43118	1	1	0.026279	0.058506	0.052391	0.119947	0.160808	0.089163
ENSBTAG00000015077	ENSBTAT00000045489	-0.0290314	0.746665	0.825583	18.6042	17.4962	20.0865	19.3099	20.217	17.8021
ENSBTAG00000009517	ENSBTAT00000012523	-0.575313	1.30675e-10	1.08726e-09	38.8891	41.8721	40.2636	59.4156	56.593	64.3184
ENSBTAG00000009517	ENSBTAT00000012523	-0.575313	1.30675e-10	1.08726e-09	38.8891	41.8721	40.2636	59.4156	56.593	64.3184
ENSBTAG00000009058	ENSBTAT00000011932	-0.508886	0.0097731	0.0240149	2.37977	2.04303	2.03591	2.97006	3.06634	3.15401
ENSBTAG00000032021	ENSBTAT00000026694	-0.295049	0.00164718	0.00498461	22.6	20.9429	21.7369	26.7706	28.5698	24.7532
ENSBTAG00000049058	ENSBTAT00000082364	1.48731	9.90838e-44	4.0283e-42	6.78063	6.22604	6.85607	2.43759	2.15049	2.4965
ENSBTAG00000006059	ENSBTAT00000069948	-0.449077	1.83193e-07	1.07735e-06	30.8921	29.0937	32.7917	42.2799	44.9011	39.4756
ENSBTAG00000016782	ENSBTAT00000022316	-0.742197	1.10742e-13	1.18189e-12	4.72558	3.93468	4.77284	7.83411	7.8363	6.79941
ENSBTAG00000012589	ENSBTAT00000078821	-0.49582	8.02429e-08	4.93141e-07	69.7192	73.0714	67.0552	98.0758	91.5191	106.313
ENSBTAG00000002056	ENSBTAT00000002662	0.0399954	0.647367	0.74889	2.34091	1.48255	2.19374	1.86577	2.36853	1.61837
ENSBTAG00000009952	ENSBTAT00000053405	-0.100342	0.810591	0.873929	2.95115	3.00367	2.64692	2.88787	3.61473	2.7187
ENSBTAG00000031579	ENSBTAT00000044771	-0.915308	4.76542e-12	4.53274e-11	2.89321	2.93928	3.27312	6.01568	6.67276	4.48446
ENSBTAG00000010998	ENSBTAT00000014607	-0.184311	0.259766	0.377041	4.10498	4.2898	4.88786	5.21294	5.07393	4.80586
ENSBTAG00000002283	ENSBTAT00000002946	0.891362	9.17519e-25	1.82244e-23	16.2476	15.4351	16.7274	7.92233	8.843	9.33278
ENSBTAG00000005517	ENSBTAT00000007254	-0.139693	0.287451	0.407622	47.2879	47.9454	50.2463	57.5108	54.7354	48.0244
ENSBTAG00000006420	ENSBTAT00000073964	0.00482755	0.499038	0.62053	18.6573	17.889	20.704	18.4742	21.7815	16.8033
ENSBTAG00000016000	ENSBTAT00000021288	0.196513	0.0656971	0.123491	2.91109	2.51655	3.26927	2.4697	2.76736	2.35237
ENSBTAG00000014469	ENSBTAT00000065285	0.279943	9.58897e-05	0.000376254	4.55285	3.93502	4.64604	3.46069	3.86889	3.48781
ENSBTAG00000011017	ENSBTAT00000076221	-0.519019	0.000155542	0.000589023	3.74957	3.59673	3.9757	5.74958	5.78886	4.68579
ENSBTAG00000011971	ENSBTAT00000070967	0.316125	2.21019e-06	1.12697e-05	18.7108	20.6521	18.3556	15.2679	16.0845	15.0085
ENSBTAG00000028809	ENSBTAT00000041189	-1.45487	0.0755541	0.138527	0.265805	8.70331	4.2013	16.9497	16.6918	2.46275
ENSBTAG00000054879	ENSBTAT00000084820	0.57063	0.00462517	0.0124141	2.33439	2.35401	2.46538	2.10242	1.60028	1.1141
ENSBTAG00000016193	ENSBTAT00000021553	-0.241325	0.0609441	0.116301	7.63441	6.88959	7.15569	8.81643	8.92487	7.8858
ENSBTAG00000005474	ENSBTAT00000007201	-0.214046	0.210748	0.319194	4.6106	4.13803	4.81074	5.4905	5.69367	4.54385
ENSBTAG00000016297	ENSBTAT00000038209	-0.246616	0.0146071	0.03416	45.3926	45.3329	47.6517	57.5106	57.5337	49.1294
ENSBTAG00000003807	ENSBTAT00000004955	-0.175586	0.114189	0.1946	20.2546	18.9139	19.5164	23.5695	22.2771	20.4335
ENSBTAG00000017258	ENSBTAT00000022939	-0.194554	0.0772374	0.141124	20.8234	19.776	22.7118	24.568	25.6571	22.2264
ENSBTAG00000011514	ENSBTAT00000015301	-0.246381	0.0498023	0.0977076	14.6607	12.4396	13.5903	16.7633	15.9405	15.5645
ENSBTAG00000040055	ENSBTAT00000053463	0.166454	0.0056179	0.0147497	18.8501	17.607	19.2456	16.7914	17.9592	14.8822
ENSBTAG00000017605	ENSBTAT00000023406	-0.492854	1.0192e-09	7.64779e-09	46.792	48.7694	46.4835	67.8918	64.5659	67.4315
ENSBTAG00000051540	ENSBTAT00000067292	-0.183384	0.078747	0.143151	28.2683	25.9422	26.9742	30.0286	30.4158	31.7444
ENSBTAG00000026684	ENSBTAT00000038058	0.503936	4.48721e-15	5.26003e-14	55.9018	56.4737	61.4055	40.1742	42.598	39.7748
ENSBTAG00000027159	ENSBTAT00000085375	-0.46729	0.000134374	0.000514311	7.2988	7.72206	7.84001	10.8017	10.3824	10.4214
ENSBTAG00000039121	ENSBTAT00000054758	0.119838	0.0211708	0.0469364	236.582	244.296	243.713	236.57	230.793	199.472
ENSBTAG00000016817	ENSBTAT00000022372	-0.384501	0.000427817	0.00148375	19.6988	18.4627	22.1356	25.1712	24.8769	28.6642
ENSBTAG00000047524	ENSBTAT00000063823	-0.0746049	0.865339	0.911214	5.17529	5.44978	5.23401	5.70576	5.75154	5.24346
ENSBTAG00000026660	ENSBTAT00000037998	0.0431925	0.308094	0.429889	15.7737	15.8374	15.6107	14.9661	16.2466	14.6162
ENSBTAG00000018385	ENSBTAT00000024465	-0.0592768	0.980448	0.989319	42.0668	45.6703	43.2092	49.476	46.2044	40.7582
ENSBTAG00000018374	ENSBTAT00000071995	0.0720371	0.0782222	0.142516	39.388	41.3118	37.0005	37.8171	38.3283	35.8221
ENSBTAG00000018413	ENSBTAT00000024500	1.63132	1.42165e-52	7.29178e-51	7.98618	8.99647	8.32384	2.66869	2.86172	2.63835
ENSBTAG00000014850	ENSBTAT00000019774	0.0567478	0.359437	0.483652	2.50353	2.28807	2.73121	2.64826	2.22223	2.36214
ENSBTAG00000005105	ENSBTAT00000006727	-0.0637644	0.94721	0.9671	4.35857	4.4093	4.73398	4.47616	5.02372	4.6121
ENSBTAG00000013761	ENSBTAT00000079833	-1.02851	5.24278e-35	1.56973e-33	15.5716	14.9153	17.0555	34.1771	32.1585	30.6472
ENSBTAG00000013761	ENSBTAT00000079910	-1.02851	5.24278e-35	1.56973e-33	15.5716	14.9153	17.0555	34.1771	32.1585	30.6472
ENSBTAG00000013761	ENSBTAT00000079910	-1.02851	5.24278e-35	1.56973e-33	15.5716	14.9153	17.0555	34.1771	32.1585	30.6472
ENSBTAG00000021786	ENSBTAT00000029039	-0.704371	0.00699165	0.0178815	0.887458	0.611085	0.727262	1.18997	1.0145	1.42234
ENSBTAG00000014885	ENSBTAT00000085441	0.555082	6.31276e-16	7.8304e-15	17.0896	15.4459	15.6126	10.5333	11.6356	10.6016
ENSBTAG00000030434	ENSBTAT00000042970	0.288829	1.63601e-06	8.48435e-06	39.9366	40.3258	40.1048	33.6621	31.3971	33.4693
ENSBTAG00000002594	ENSBTAT00000003359	-0.0289359	0.795273	0.862154	10.908	9.23233	9.33513	9.91291	10.5115	9.64816
ENSBTAG00000016578	ENSBTAT00000083092	-0.18757	0.0543969	0.105412	54.902	54.2893	56.86	65.0381	61.6706	62.3979
ENSBTAG00000009502	ENSBTAT00000012504	0.437155	1.54529e-11	1.40393e-10	19.7834	20.6226	21.3074	15.2241	15.8514	14.5054
ENSBTAG00000006940	ENSBTAT00000009110	-0.279736	0.00262066	0.0075116	12.6335	12.9369	12.7166	15.8167	16.128	14.5346
ENSBTAG00000040215	ENSBTAT00000037768	0.144978	0.00429152	0.0116456	26.8183	25.7391	25.8829	24.1865	24.6746	22.0797
ENSBTAG00000040215	ENSBTAT00000037768	0.144978	0.00429152	0.0116456	26.8183	25.7391	25.8829	24.1865	24.6746	22.0797
ENSBTAG00000018656	ENSBTAT00000076273	-0.240541	0.0221154	0.0487637	40.4598	38.4867	41.9106	48.7058	51.8381	42.2409
ENSBTAG00000018656	ENSBTAT00000076273	-0.240541	0.0221154	0.0487637	40.4598	38.4867	41.9106	48.7058	51.8381	42.2409
ENSBTAG00000018656	ENSBTAT00000076273	-0.240541	0.0221154	0.0487637	40.4598	38.4867	41.9106	48.7058	51.8381	42.2409
ENSBTAG00000017644	ENSBTAT00000023470	-0.0409879	1	1	0.318676	0.193077	0.209005	0.14357	0.29224	0.305719
ENSBTAG00000034978	ENSBTAT00000051818	0.0826633	0.0469471	0.0929763	29.3052	28.6942	31.033	27.9491	29.3338	26.7915
ENSBTAG00000005444	ENSBTAT00000007163	-0.416855	8.54073e-07	4.61427e-06	20.0001	19.4625	21.4174	27.7656	28.2156	25.2946
ENSBTAG00000000266	ENSBTAT00000000331	0.300975	0.000331755	0.00117404	6.85577	5.61843	6.99725	5.26529	5.56081	4.97894
ENSBTAG00000007584	ENSBTAT00000084681	0.0968187	0.224299	0.335426	5.54156	5.86616	5.35845	5.1765	5.91468	4.58674
ENSBTAG00000026994	ENSBTAT00000038641	-0.794786	1	1	0.883148	1.01649	0.851815	1.56229	2.01863	1.19236
ENSBTAG00000018795	ENSBTAT00000072587	-0.310321	0.0389124	0.0792062	5.46363	4.36191	5.25231	6.97452	6.49595	5.22582
ENSBTAG00000000492	ENSBTAT00000056728	-0.16354	0.157226	0.252876	33.6926	30.274	35.2235	37.3061	38.6628	35.1271
ENSBTAG00000050392	ENSBTAT00000081025	0.0251734	0.325304	0.44814	6.7293	6.67594	6.88017	7.22203	6.54995	6.16254
ENSBTAG00000021762	ENSBTAT00000029007	-0.111511	0.435353	0.55907	38.5806	38.1711	40.962	44.1459	42.3184	40.7087
ENSBTAG00000020961	ENSBTAT00000027915	0.0764176	0.412689	0.536655	5.34495	4.18692	3.91822	4.6855	4.84497	3.22572
ENSBTAG00000008390	ENSBTAT00000076813	-0.222976	0.0244646	0.0531817	45.8296	43.0241	45.9217	55.1141	54.2909	47.8965
ENSBTAG00000000937	ENSBTAT00000001241	-0.226723	0.0772915	0.14118	5.51373	4.92327	6.24347	6.41786	7.14431	5.95688
ENSBTAG00000049845	ENSBTAT00000076582	0.244347	0.0201217	0.0448477	9.60458	9.594	9.95971	7.51704	8.35136	8.74695
ENSBTAG00000001083	ENSBTAT00000038527	-0.108072	0.551888	0.667015	9.99355	8.59802	10.8311	10.3401	11.0956	10.2756
ENSBTAG00000001083	ENSBTAT00000038527	-0.108072	0.551888	0.667015	9.99355	8.59802	10.8311	10.3401	11.0956	10.2756
ENSBTAG00000017266	ENSBTAT00000022960	1.61765	2.20736e-86	2.37457e-84	18.9442	20.9075	18.1222	6.35736	6.69123	5.84306
ENSBTAG00000017266	ENSBTAT00000022960	1.61765	2.20736e-86	2.37457e-84	18.9442	20.9075	18.1222	6.35736	6.69123	5.84306
ENSBTAG00000017266	ENSBTAT00000022960	1.61765	2.20736e-86	2.37457e-84	18.9442	20.9075	18.1222	6.35736	6.69123	5.84306
ENSBTAG00000007683	ENSBTAT00000064596	0.0784217	0.317705	0.440217	4.97298	3.69768	4.88103	4.58483	4.08367	4.16621
ENSBTAG00000049118	ENSBTAT00000084126	2.52677	1	1	0.434002	0.271463	0.241434	0.109844	0	0.054468
ENSBTAG00000001093	ENSBTAT00000074131	-0.128612	0.714524	0.801377	0.975636	0.851155	1.19582	1.26644	1.11746	0.92055
ENSBTAG00000001093	ENSBTAT00000001447	-0.128612	0.714524	0.801377	0.975636	0.851155	1.19582	1.26644	1.11746	0.92055
ENSBTAG00000017743	ENSBTAT00000023600	0.490058	1.48786e-05	6.70363e-05	8.90437	6.16288	9.49777	5.8521	6.39793	5.24018
ENSBTAG00000006654	ENSBTAT00000046172	-0.0236274	0.747612	0.826255	10.6391	10.7698	11.533	12.2166	11.8267	9.44256
ENSBTAG00000013773	ENSBTAT00000018330	-0.154996	0.37348	0.498466	5.04011	5.19616	4.81377	6.33538	5.83021	4.59141
ENSBTAG00000026851	ENSBTAT00000078539	0.0298902	0.469284	0.592072	5.26127	5.75163	6.54684	5.14246	7.00896	5.04825
ENSBTAG00000021020	ENSBTAT00000027997	-0.37452	0.0005436	0.00183658	6.02975	5.52424	6.29443	7.36175	8.84413	6.93295
ENSBTAG00000021020	ENSBTAT00000027997	-0.37452	0.0005436	0.00183658	6.02975	5.52424	6.29443	7.36175	8.84413	6.93295
ENSBTAG00000019592	ENSBTAT00000061479	-0.05543	0.991314	0.996715	2.7699	2.60042	2.4841	2.82909	2.83165	2.50133
ENSBTAG00000018114	ENSBTAT00000024108	-0.454307	1.02551e-05	4.73997e-05	11.8115	11.1389	10.9614	15.6185	17.4057	13.4392
ENSBTAG00000013455	ENSBTAT00000017898	-0.228443	0.0825842	0.149034	9.22748	8.54436	8.86423	10.4687	10.9662	9.77112
ENSBTAG00000015169	ENSBTAT00000020184	0.112067	0.0353906	0.0730157	69.2537	66.1482	67.1717	67.2358	65.0448	55.1529
ENSBTAG00000014158	ENSBTAT00000018816	0.0738497	0.0981646	0.171993	10.3055	9.36902	10.0926	9.09789	10.1839	8.9999
ENSBTAG00000018744	ENSBTAT00000084669	-0.158921	0.330079	0.453127	3.52071	3.44846	3.15927	3.76926	3.61953	3.91913
ENSBTAG00000005234	ENSBTAT00000006890	-1.43118	1	1	0.026279	0.058506	0.052391	0.119947	0.160808	0.089163
ENSBTAG00000010221	ENSBTAT00000013489	-0.00656368	0.538968	0.655694	12.6196	12.3627	13.1938	13.5536	12.7272	12.0694
ENSBTAG00000021494	ENSBTAT00000038355	0.520832	8.78253e-10	6.66419e-09	15.2047	15.3824	14.0482	10.6016	10.8416	9.66624
ENSBTAG00000010599	ENSBTAT00000014020	0.0414626	0.578925	0.69001	6.3626	6.3443	8.32629	7.25992	6.96542	6.21197
ENSBTAG00000026829	ENSBTAT00000038352	0.283931	0.00052757	0.00178938	11.0922	9.56313	11.3727	8.68574	8.76252	8.85793
ENSBTAG00000013196	ENSBTAT00000017564	0.96335	2.79514e-19	4.21561e-18	17.7562	16.2233	17.9734	9.17698	10.0822	7.38568
ENSBTAG00000020696	ENSBTAT00000063835	0.190678	0.200906	0.307778	0.78311	0.616656	0.582541	0.536164	0.579525	0.621196
ENSBTAG00000012586	ENSBTAT00000064253	-0.51734	3.20375e-10	2.56553e-09	123.679	122.761	126.389	185.144	186.496	161.995
ENSBTAG00000005416	ENSBTAT00000076254	-0.0695808	0.912353	0.944038	6.03087	5.63186	5.83321	6.52715	6.63834	5.19496
ENSBTAG00000007395	ENSBTAT00000060956	-0.159699	0.175828	0.276861	6.67904	6.69815	6.69147	7.56583	7.66443	7.18753
ENSBTAG00000049402	ENSBTAT00000080879	-0.391921	2.42125e-05	0.000105079	27.4617	30.0893	27.2217	37.6142	38.7568	34.8628
ENSBTAG00000052083	ENSBTAT00000068324	-0.389279	0.00821839	0.0206816	3.36111	3.45668	3.45587	4.70066	4.07432	4.68083
ENSBTAG00000020957	ENSBTAT00000027911	-1.23063	0.000134971	0.00051611	0.180136	0.175352	0.356349	0.552695	0.551749	0.566023
ENSBTAG00000021600	ENSBTAT00000064044	-0.117286	0.678248	0.773722	2.44887	2.47973	2.75652	2.56551	3.36775	2.40273
ENSBTAG00000015066	ENSBTAT00000020055	0.0352007	0.318156	0.44049	23.4031	19.5865	24.777	22.3004	23.862	19.9708
ENSBTAG00000048438	ENSBTAT00000082783	-2.06289	1	1	0.126194	0	0	0	0.25335	0.273918
ENSBTAG00000054218	ENSBTAT00000078855	-3.70295	2.36283e-219	2.87226e-216	7.26759	8.96008	6.65941	106.222	102.799	89.0294
ENSBTAG00000016951	ENSBTAT00000022552	0.183638	0.003111	0.00874186	27.2579	27.9007	26.4756	23.6416	22.2151	26.0206
ENSBTAG00000021769	ENSBTAT00000029018	0.146665	0.00359142	0.00992887	31.651	30.2806	32.9864	28.5663	29.1171	28.0595
ENSBTAG00000037640	ENSBTAT00000021532	0.830684	1.09947e-30	2.79023e-29	21.36	22.749	21.5725	12.5501	12.2025	12.1776
ENSBTAG00000021653	ENSBTAT00000038151	-0.020495	0.598917	0.707388	37.8194	36.7686	38.1538	38.4743	39.7127	36.1677
ENSBTAG00000018067	ENSBTAT00000024053	-0.220167	0.0348332	0.0720607	14.7489	14.2405	14.4897	17.159	18.1877	15.3006
ENSBTAG00000018199	ENSBTAT00000024222	0.623233	1.23294e-06	6.50221e-06	2.53799	2.54766	2.60765	1.69966	1.71676	1.57819
ENSBTAG00000015103	ENSBTAT00000020098	-0.317604	0.0982989	0.172154	2.3602	3.25451	2.33307	3.34002	3.01423	3.55073
ENSBTAG00000016818	ENSBTAT00000022373	-0.240392	0.0120282	0.0288391	26.1165	25.4456	26.6463	31.7479	29.4393	31.2014
ENSBTAG00000015771	ENSBTAT00000020940	0.0654636	0.106115	0.183122	21.6523	20.2493	20.8706	19.083	21.0729	19.8315
ENSBTAG00000003788	ENSBTAT00000072394	-0.0946813	0.654937	0.755567	9.61126	8.49625	9.06479	9.29424	9.68214	10.039
ENSBTAG00000002678	ENSBTAT00000003468	-0.297261	0.130729	0.217661	4.07384	5.12503	3.90639	5.09326	5.69959	5.31102
ENSBTAG00000003866	ENSBTAT00000005043	0.108217	0.0457239	0.0909838	11.6962	10.8749	11.9782	11.2026	10.5811	10.2689
ENSBTAG00000001513	ENSBTAT00000071412	0.0194936	0.680855	0.776332	1.69115	1.5745	2.00877	1.73764	1.75389	1.71211
ENSBTAG00000021781	ENSBTAT00000042894	0.0777977	0.122116	0.205517	15.6651	14.5748	16.2546	14.5128	15.6495	13.8912
ENSBTAG00000002988	ENSBTAT00000003890	0.215843	0.000687779	0.00226514	18.4608	20.1379	18.7119	17.0994	17.122	15.1255
ENSBTAG00000009470	ENSBTAT00000054397	0.0321464	0.196003	0.301787	205.217	208.214	216.981	208.951	211.404	196.165
ENSBTAG00000013048	ENSBTAT00000082568	0.137226	0.0503062	0.0986325	8.96351	10.3157	9.98641	8.56485	8.93621	9.10912
ENSBTAG00000030435	ENSBTAT00000042971	-0.395565	0.000252013	0.000916124	56.8227	54.4939	55.9331	78.9282	80.1728	60.909
ENSBTAG00000040602	ENSBTAT00000056243	-0.409964	1.1182e-06	5.93833e-06	177.279	178.188	180.55	245.983	248.589	217.608
ENSBTAG00000006084	ENSBTAT00000029455	-0.184387	0.123315	0.207276	12.6007	11.4524	13.4669	14.5834	13.6533	14.3985
ENSBTAG00000011950	ENSBTAT00000042854	-0.422415	2.72918e-07	1.57605e-06	30.1122	29.3575	27.6819	38.8465	38.7054	39.246
ENSBTAG00000012052	ENSBTAT00000015991	0.0373228	0.629443	0.734239	0.993528	0.956022	1.19356	0.966875	1.11285	0.983107
ENSBTAG00000003822	ENSBTAT00000042789	-0.153122	0.379316	0.504482	1.66165	1.69501	1.74384	1.76979	1.92721	1.97462
ENSBTAG00000009251	ENSBTAT00000037763	-0.509904	2.78739e-07	1.60738e-06	15.0381	13.5178	14.9802	19.3084	21.6605	21.0245
ENSBTAG00000008931	ENSBTAT00000011757	0.327529	5.31e-05	0.00021829	16.4139	17.2239	15.8952	13.0061	14.6817	11.7851
ENSBTAG00000047468	ENSBTAT00000066304	-1.6025	1	1	0.112645	0.0445946	0.0158761	0.177046	0.132581	0.216071
ENSBTAG00000013210	ENSBTAT00000017583	-1.15109	9.91161e-16	1.21213e-14	2.0124	1.65068	1.48401	3.90674	3.47375	4.05026
ENSBTAG00000005796	ENSBTAT00000086437	0.119269	0.209541	0.317842	31.3294	30.9431	34.6146	34.0399	34.515	20.6446
ENSBTAG00000002419	ENSBTAT00000003140	-0.0137825	0.682255	0.77765	5.32203	5.47836	5.43558	6.01742	5.56663	4.80776
ENSBTAG00000008649	ENSBTAT00000011404	0.0382861	0.251917	0.368243	12.3948	12.6602	13.8925	13.2936	13.2167	11.4172
ENSBTAG00000015794	ENSBTAT00000020974	-1.09925	3.86061e-52	1.94728e-50	149.624	143.331	147.958	325.499	323.949	295.18
ENSBTAG00000009435	ENSBTAT00000012415	0.187447	0.000409435	0.00142569	17.5841	17.8	17.8172	15.2461	15.9097	15.5633
ENSBTAG00000019158	ENSBTAT00000025498	-0.204783	0.470698	0.593241	1.3925	1.12502	1.30418	1.26589	1.3747	1.76396
ENSBTAG00000001212	ENSBTAT00000073018	-0.325558	5.76691e-05	0.00023548	187.291	191.161	193.026	243.497	239.799	232.852
ENSBTAG00000000108	ENSBTAT00000000119	0.238081	0.000605772	0.00202468	14.8919	13.6455	14.9456	12.9518	12.9388	10.9775
ENSBTAG00000000105	ENSBTAT00000000114	-0.258094	0.0117926	0.0283471	17.0259	15.4762	16.0844	19.7076	20.7419	17.655
ENSBTAG00000000105	ENSBTAT00000000114	-0.258094	0.0117926	0.0283471	17.0259	15.4762	16.0844	19.7076	20.7419	17.655
ENSBTAG00000003954	ENSBTAT00000005172	0.190288	0.000545917	0.00184296	13.0398	12.6574	13.908	11.4122	12.1877	11.1113
ENSBTAG00000017819	ENSBTAT00000023689	0.313899	0.0138158	0.0325097	4.25493	4.29347	3.63411	3.26793	3.17918	3.35329
ENSBTAG00000007519	ENSBTAT00000009896	-0.0881569	0.663822	0.76321	14.4451	13.8732	14.4992	14.592	15.9757	14.9478
ENSBTAG00000020026	ENSBTAT00000026674	0.0460565	0.540397	0.657104	41.7395	42.5481	27.1803	29.9748	47.0482	30.9426
ENSBTAG00000011284	ENSBTAT00000034015	-0.101779	0.501288	0.622183	103.143	104.702	106.425	109.929	111.786	115.527
ENSBTAG00000006678	ENSBTAT00000008766	0.0892741	0.0867672	0.155406	14.5278	13.7019	12.9332	13.4184	13.6309	11.6436
ENSBTAG00000012471	ENSBTAT00000016549	-0.356422	1.77925e-05	7.89939e-05	59.4975	53.705	58.5467	73.512	73.0168	73.3527
ENSBTAG00000019203	ENSBTAT00000025561	0.0552109	0.20763	0.315534	765.161	735.828	752.633	681.336	667.006	820.666
ENSBTAG00000015147	ENSBTAT00000020150	-0.193043	0.0972465	0.17068	161.237	172.389	153.727	202.747	180.946	173.436
ENSBTAG00000000797	ENSBTAT00000001054	-0.544128	4.69105e-11	4.08484e-10	29.2977	30.9868	31.4817	43.991	44.2939	45.523
ENSBTAG00000021289	ENSBTAT00000033883	0.104522	0.0348485	0.0720607	6.76017	7.05695	7.00849	6.55186	6.54914	6.26917
ENSBTAG00000020394	ENSBTAT00000027182	-2.60109	1	1	0	0.077255	0	0.132758	0	0.335983
ENSBTAG00000020357	ENSBTAT00000027131	0.0258972	0.344948	0.468984	13.3824	12.4376	12.2056	12.6507	12.2764	12.4221
ENSBTAG00000007123	ENSBTAT00000009379	-0.225147	0.0199164	0.0444798	23.3909	22.2017	24.998	27.6117	28.0371	26.8644
ENSBTAG00000007123	ENSBTAT00000009379	-0.225147	0.0199164	0.0444798	23.3909	22.2017	24.998	27.6117	28.0371	26.8644
ENSBTAG00000015154	ENSBTAT00000020159	0.453896	2.0751e-08	1.36277e-07	117.013	111.769	126.442	91.0299	95.0996	73.2085
ENSBTAG00000001586	ENSBTAT00000021435	-0.0990296	0.647584	0.74889	13.2119	12.7682	13.2099	13.0652	12.8625	16.0468
ENSBTAG00000046003	ENSBTAT00000055068	-0.693256	0.0145465	0.0340467	1.39096	1.60485	1.45924	2.50974	2.08354	2.61021
ENSBTAG00000020060	ENSBTAT00000026724	0.218869	0.00141364	0.00433289	107.373	85.2903	92.1313	82.1411	86.2326	76.333
ENSBTAG00000006720	ENSBTAT00000008837	-1.11836	2.69988e-19	4.07699e-18	3.3954	4.04965	4.26896	8.02829	8.58862	8.81423
ENSBTAG00000007767	ENSBTAT00000033724	0.925443	2.29411e-38	7.81153e-37	18.6341	19.2552	18.0021	10.0332	9.62689	9.76773
ENSBTAG00000007767	ENSBTAT00000010213	0.925443	2.29411e-38	7.81153e-37	18.6341	19.2552	18.0021	10.0332	9.62689	9.76773
ENSBTAG00000000678	ENSBTAT00000000901	-0.0723954	0.825914	0.884253	130.427	130.24	137.02	145.069	144.918	128.165
ENSBTAG00000012194	ENSBTAT00000074469	-0.197025	0.18937	0.293358	4.42953	4.49815	4.75306	5.61431	5.59189	4.47647
ENSBTAG00000048431	ENSBTAT00000044498	-0.890052	1	1	0.452609	0.260752	0.432099	0.495539	1.09367	0.533604
ENSBTAG00000001499	ENSBTAT00000001967	-0.0761585	0.811694	0.874372	6.53307	6.47901	6.95468	6.83478	7.1886	7.02572
ENSBTAG00000031940	ENSBTAT00000026134	0.0223099	0.590287	0.699846	1.62232	1.6061	1.66877	1.48902	1.6218	1.71122
ENSBTAG00000031940	ENSBTAT00000026134	0.0223099	0.590287	0.699846	1.62232	1.6061	1.66877	1.48902	1.6218	1.71122
ENSBTAG00000015107	ENSBTAT00000020102	-0.604424	8.16652e-12	7.60707e-11	44.9256	41.2919	45.8655	68.7299	72.331	59.7542
ENSBTAG00000012659	ENSBTAT00000016798	0.182172	0.00679594	0.0174654	8.10485	7.83702	7.59992	6.95907	7.5609	6.22917
ENSBTAG00000020384	ENSBTAT00000027170	0.209572	0.0105792	0.0258172	7.13884	5.8524	6.69229	5.91375	6.20986	4.89858
ENSBTAG00000021217	ENSBTAT00000028276	0.362484	1.0613e-09	7.93914e-09	302.384	286.533	305.814	237.036	241.437	217.471
ENSBTAG00000021217	ENSBTAT00000028276	0.362484	1.0613e-09	7.93914e-09	302.384	286.533	305.814	237.036	241.437	217.471
ENSBTAG00000021217	ENSBTAT00000028276	0.362484	1.0613e-09	7.93914e-09	302.384	286.533	305.814	237.036	241.437	217.471
ENSBTAG00000019026	ENSBTAT00000025321	-0.24406	0.070823	0.131139	6.93313	6.51732	7.08224	8.63438	8.89954	6.78338
ENSBTAG00000019026	ENSBTAT00000025321	-0.24406	0.070823	0.131139	6.93313	6.51732	7.08224	8.63438	8.89954	6.78338
ENSBTAG00000007101	ENSBTAT00000009341	1.09328	1.59064e-20	2.57812e-19	5.95613	6.36995	5.87572	2.71577	2.96679	2.8485
ENSBTAG00000004190	ENSBTAT00000071906	0.316798	3.16036e-06	1.58161e-05	37.8075	35.8119	40.2212	31.4483	32.7227	27.226
ENSBTAG00000047679	ENSBTAT00000010317	0.0998066	0.0667365	0.125	40.5415	39.1824	42.5165	40.6373	40.5893	32.843
ENSBTAG00000047679	ENSBTAT00000010317	0.0998066	0.0667365	0.125	40.5415	39.1824	42.5165	40.6373	40.5893	32.843
ENSBTAG00000003245	ENSBTAT00000063777	-0.738299	7.47023e-16	9.2191e-15	4.67183	4.56577	5.07185	7.66181	8.10976	8.09958
ENSBTAG00000002028	ENSBTAT00000002628	-0.0356906	0.828089	0.885969	13.2801	11.4895	13.5301	12.9717	14.2385	12.0487
ENSBTAG00000011363	ENSBTAT00000040289	0.220663	0.00119013	0.00371716	8.07127	7.79506	8.74984	7.26372	6.98338	6.87778
ENSBTAG00000011200	ENSBTAT00000067737	-0.13345	0.47258	0.595193	7.26091	5.93684	8.06197	7.68888	8.786	6.8452
ENSBTAG00000011200	ENSBTAT00000067737	-0.13345	0.47258	0.595193	7.26091	5.93684	8.06197	7.68888	8.786	6.8452
ENSBTAG00000052268	ENSBTAT00000072535	-0.0931828	0.651024	0.751724	87.0132	86.2618	90.0383	98.1915	100.36	82.3304
ENSBTAG00000052722	ENSBTAT00000082721	-0.378351	0.00520731	0.0137819	2.7297	2.91927	2.84168	3.39214	3.94601	3.69847
ENSBTAG00000013851	ENSBTAT00000018398	0.0415013	0.319309	0.441834	12.9007	12.9493	14.361	13.8255	14.1336	11.1117
ENSBTAG00000016326	ENSBTAT00000021717	0.426059	0.000110689	0.000430297	9.55505	9.41769	10.3475	7.8657	8.02577	5.93134
ENSBTAG00000003444	ENSBTAT00000004474	0.00366061	0.741784	0.821755	1.35867	0.961755	1.18178	1.01435	1.401	1.07797
ENSBTAG00000003444	ENSBTAT00000004474	0.00366061	0.741784	0.821755	1.35867	0.961755	1.18178	1.01435	1.401	1.07797
ENSBTAG00000003791	ENSBTAT00000004931	0.422634	1.43485e-05	6.48643e-05	5.46856	4.73401	4.90618	3.96571	3.53292	3.77342
ENSBTAG00000017419	ENSBTAT00000043918	-0.0639211	0.927226	0.954229	17.0511	15.8337	17.4144	18.077	18.8449	15.656
ENSBTAG00000005445	ENSBTAT00000007164	0.285219	0.0587817	0.112652	5.22302	4.72271	4.72117	3.39772	5.28526	3.35292
ENSBTAG00000004037	ENSBTAT00000005279	-0.535534	7.05204e-09	4.87903e-08	22.5513	25.1514	24.7185	36.9612	32.6001	35.4116
ENSBTAG00000013961	ENSBTAT00000033324	-0.0233372	0.715548	0.802283	6.9095	6.35778	6.3565	6.75997	7.4771	5.70673
ENSBTAG00000017326	ENSBTAT00000023044	-0.294744	0.178473	0.280123	2.28028	1.96639	1.97582	3.02959	2.64447	1.95886
ENSBTAG00000016990	ENSBTAT00000061043	-0.265913	0.00429189	0.0116456	7.62868	7.22772	8.19257	9.07508	9.37991	9.259
ENSBTAG00000040313	ENSBTAT00000052546	-0.128582	0.715379	0.802227	1.66813	1.24564	1.51738	1.33785	1.57716	1.9292
ENSBTAG00000010717	ENSBTAT00000087193	0.0449762	0.288958	0.409248	11.7269	12.8712	10.4693	11.0407	11.6899	11.2605
ENSBTAG00000007112	ENSBTAT00000009357	0.0305838	0.500871	0.622008	11.9536	11.2352	10.4378	10.9697	11.2666	10.685
ENSBTAG00000003485	ENSBTAT00000004528	-0.348498	0.00227497	0.00662839	50.066	46.3734	44.105	55.6664	56.2111	67.0684
ENSBTAG00000002721	ENSBTAT00000079224	0.512645	4.73272e-11	4.11523e-10	7.98862	8.38348	8.16398	5.85835	6.24216	5.09772
ENSBTAG00000002721	ENSBTAT00000079224	0.512645	4.73272e-11	4.11523e-10	7.98862	8.38348	8.16398	5.85835	6.24216	5.09772
ENSBTAG00000011024	ENSBTAT00000014645	-0.302749	0.000601704	0.00201275	32.3836	31.6617	31.3966	40.228	39.3632	38.1357
ENSBTAG00000005542	ENSBTAT00000053382	-0.268435	0.00610756	0.0159014	36.1477	34.912	36.2484	45.4494	45.3299	38.4733
ENSBTAG00000003128	ENSBTAT00000004068	-0.598753	1.21081e-05	5.54162e-05	4.72895	6.05817	5.49125	8.03582	8.73125	7.885
ENSBTAG00000051070	ENSBTAT00000084822	-0.218776	0.453849	0.576909	1.90624	2.30045	2.5872	2.22531	2.95313	2.72791
ENSBTAG00000017844	ENSBTAT00000023728	-1.60151	3.92657e-22	6.90758e-21	0.599973	0.606861	0.731072	2.15455	2.01896	1.70726
ENSBTAG00000023551	ENSBTAT00000032168	0.0308504	0.477277	0.599605	3.26592	3.70659	3.14923	3.00928	3.45476	3.44355
ENSBTAG00000003642	ENSBTAT00000004751	-0.796886	1.58625e-23	2.96197e-22	227.635	245.969	234.148	423.765	387.617	418.229
ENSBTAG00000019013	ENSBTAT00000025307	-0.394601	0.000410512	0.00142903	8.84716	8.11389	8.3709	10.7999	10.129	12.372
ENSBTAG00000009617	ENSBTAT00000042960	-0.144175	0.297271	0.417712	8.73784	8.20362	8.94702	9.61552	9.77261	9.22118
ENSBTAG00000017387	ENSBTAT00000023120	0.820264	1	1	0.371276	0.302428	0.300145	0.205942	0.106902	0.238684
ENSBTAG00000017382	ENSBTAT00000023110	-0.23413	0.0108391	0.0263982	57.2111	60.151	56.5495	67.0039	68.6924	68.8581
ENSBTAG00000054059	ENSBTAT00000066686	1.12044	2.12113e-06	1.08657e-05	0.487671	0.371683	0.542185	0.207116	0.176903	0.260626
ENSBTAG00000009368	ENSBTAT00000012331	0.411613	5.03222e-08	3.15643e-07	38.6108	33.1974	37.5114	28.4451	29.3014	24.438
ENSBTAG00000053523	ENSBTAT00000071861	-0.60808	1	1	0.351232	0.202145	0.26331	0.391551	0.360657	0.49261
ENSBTAG00000014325	ENSBTAT00000019047	0.24904	0.00424013	0.0115206	6.04483	5.26026	5.56871	4.94967	5.01616	4.23274
ENSBTAG00000016852	ENSBTAT00000083163	0.0314896	0.365669	0.490085	6.26632	6.54227	7.05251	6.62337	6.70328	6.10564
ENSBTAG00000016852	ENSBTAT00000083163	0.0314896	0.365669	0.490085	6.26632	6.54227	7.05251	6.62337	6.70328	6.10564
ENSBTAG00000007994	ENSBTAT00000075531	-0.316166	0.247442	0.36323	1.45213	1.86611	1.47397	1.47041	2.16343	2.33255
ENSBTAG00000010175	ENSBTAT00000013427	0.0138842	0.434509	0.558517	5.42019	5.9052	5.31724	5.35446	5.33394	5.79483
ENSBTAG00000021948	ENSBTAT00000070872	0.144506	0.0706989	0.130969	5.02851	4.83887	5.76817	5.3419	4.84626	3.95716
ENSBTAG00000013867	ENSBTAT00000006420	-0.599557	0.00973155	0.0239225	0.694179	0.596197	0.68938	0.984384	0.767904	1.24754
ENSBTAG00000014235	ENSBTAT00000018920	-0.128535	0.487651	0.609614	20.288	16.4838	18.8897	20.3625	19.022	21.4638
ENSBTAG00000014079	ENSBTAT00000018720	0.107625	0.022925	0.0503571	19.1431	20.4277	18.8453	18.4567	18.1149	17.6452
ENSBTAG00000013869	ENSBTAT00000087052	-0.12604	0.325225	0.448083	28.1096	29.6047	27.5163	30.3393	31.2496	31.4226
ENSBTAG00000005354	ENSBTAT00000068452	0.395627	9.88495e-11	8.31567e-10	23.2112	23.4401	22.7245	17.4215	18.3264	16.9888
ENSBTAG00000015973	ENSBTAT00000048470	0.0764204	0.152704	0.247008	4.87702	4.63128	4.72209	4.60106	4.50201	4.39315
ENSBTAG00000009123	ENSBTAT00000012025	-0.24851	0.0658374	0.123659	3.36318	3.81681	4.04035	4.61751	4.48056	4.23146
ENSBTAG00000037819	ENSBTAT00000083041	-0.0784949	0.85433	0.903221	4.15864	3.99804	4.42157	4.62585	4.73854	3.91719
ENSBTAG00000020969	ENSBTAT00000027930	0.0183535	0.295159	0.415368	15.9576	15.8967	15.582	15.5766	15.6754	15.5847
ENSBTAG00000002823	ENSBTAT00000003653	-0.277057	0.00392942	0.010763	42.6929	41.6321	42.9125	52.8361	55.2154	46.1247
ENSBTAG00000010775	ENSBTAT00000049793	-0.371477	0.000138913	0.000530346	7.56007	7.80169	7.86491	10.3115	10.7226	9.0137
ENSBTAG00000010775	ENSBTAT00000049793	-0.371477	0.000138913	0.000530346	7.56007	7.80169	7.86491	10.3115	10.7226	9.0137
ENSBTAG00000044150	ENSBTAT00000061309	-0.572839	3.50564e-09	2.49939e-08	11.714	12.9448	11.9251	17.7473	18.4404	18.229
ENSBTAG00000054238	ENSBTAT00000069622	-0.236105	0.300053	0.420697	3.53177	3.62089	3.10483	4.16597	3.87582	4.03957
ENSBTAG00000054766	ENSBTAT00000077614	0.281196	1	1	0	0.073397	0	0	0.036813	0.023586
ENSBTAG00000021705	ENSBTAT00000028928	-0.392915	2.00225e-05	8.82499e-05	51.9122	52.5159	53.7152	67.925	65.6127	74.1114
ENSBTAG00000020153	ENSBTAT00000079563	-0.0451952	0.921871	0.950086	6.54278	5.64856	5.83478	6.54431	5.9639	6.09155
ENSBTAG00000000404	ENSBTAT00000080451	-0.0893508	0.712674	0.799932	18.5114	22.0074	20.8381	22.3006	20.5738	22.4027
ENSBTAG00000011754	ENSBTAT00000048084	-0.217599	0.101574	0.176875	19.5654	20.9266	18.8336	21.1149	22.2865	25.5822
ENSBTAG00000011754	ENSBTAT00000048084	-0.217599	0.101574	0.176875	19.5654	20.9266	18.8336	21.1149	22.2865	25.5822
ENSBTAG00000011209	ENSBTAT00000014885	0.0273372	0.2767	0.395426	14.9181	14.6105	14.3659	14.9894	15.0871	12.9941
ENSBTAG00000010622	ENSBTAT00000014043	-3.2445	1	1	0	0.0110988	0.0455087	0.206746	0.136497	0.193252
ENSBTAG00000010673	ENSBTAT00000033972	-0.586841	1	1	0.255557	0.160528	0.306644	0.551562	0.209415	0.324529
ENSBTAG00000024476	ENSBTAT00000033975	-1.35695	2.38489e-23	4.40588e-22	12.4282	11.2715	12.2257	28.9722	30.0972	32.951
ENSBTAG00000005161	ENSBTAT00000081817	0.0712903	0.0852274	0.153054	16.1477	17.0166	15.4366	14.8496	15.9378	15.4704
ENSBTAG00000005161	ENSBTAT00000081817	0.0712903	0.0852274	0.153054	16.1477	17.0166	15.4366	14.8496	15.9378	15.4704
ENSBTAG00000006099	ENSBTAT00000008015	-0.030968	0.747112	0.825927	15.3539	16.097	17.1964	17.4545	16.3286	15.9197
ENSBTAG00000024378	ENSBTAT00000033773	-0.088905	0.675982	0.772079	18.8553	19.6036	19.9185	21.2678	19.9643	20.8559
ENSBTAG00000021485	ENSBTAT00000028638	-0.316371	0.144662	0.236391	5.37129	5.27816	5.33086	6.95574	5.99558	6.94729
ENSBTAG00000004852	ENSBTAT00000006381	-0.172541	0.175707	0.276805	12.8484	12.7553	11.5588	14.1526	14.0295	13.7016
ENSBTAG00000006050	ENSBTAT00000007946	-0.0439879	0.940627	0.963047	8.33794	6.47467	7.01928	8.32477	6.84505	7.33797
ENSBTAG00000003586	ENSBTAT00000072527	0.184054	0.00205136	0.00605397	27.8919	28.2407	29.5237	26.4626	26.378	22.5563
ENSBTAG00000015392	ENSBTAT00000033711	-0.984096	9.0213e-30	2.18018e-28	6.66394	6.43951	6.11631	12.763	13.2745	11.9806
ENSBTAG00000005788	ENSBTAT00000066611	0.043887	0.408852	0.533206	4.39838	4.61648	4.95287	4.55903	4.17108	4.81912
ENSBTAG00000019611	ENSBTAT00000061528	-0.283712	0.00174807	0.00525588	6.86649	6.55227	6.91606	8.54918	8.28987	7.91498
ENSBTAG00000008525	ENSBTAT00000071713	0.117858	0.0551351	0.106638	7.91955	7.00819	7.52638	6.4476	7.51406	6.73104
ENSBTAG00000018717	ENSBTAT00000024914	0.0949027	0.0571818	0.110037	17.3025	15.6936	17.5047	16.4792	16.0829	14.7236
ENSBTAG00000012555	ENSBTAT00000052066	-0.253393	0.089811	0.159835	4.31586	4.03919	3.93562	4.31537	5.19487	5.14033
ENSBTAG00000000283	ENSBTAT00000000353	-0.574112	2.9135e-13	2.99632e-12	21.5363	19.7768	21.6934	32.1332	30.6837	30.9845
ENSBTAG00000015470	ENSBTAT00000020561	1.35129	7.6888e-28	1.72764e-26	8.04843	8.2295	7.29832	3.45538	3.16783	2.61731
ENSBTAG00000005439	ENSBTAT00000007157	0.0256707	0.584854	0.694896	4.48182	3.99123	5.27144	4.09424	4.7146	4.69325
ENSBTAG00000048635	ENSBTAT00000072536	-0.204187	1	1	0.961335	1.24867	1.1652	1.22961	1.60844	1.0503
ENSBTAG00000039951	ENSBTAT00000009750	-0.369776	0.0195239	0.0437884	6.81621	6.12799	6.81524	7.33805	8.27552	9.91864
ENSBTAG00000039951	ENSBTAT00000009750	-0.369776	0.0195239	0.0437884	6.81621	6.12799	6.81524	7.33805	8.27552	9.91864
ENSBTAG00000019027	ENSBTAT00000025323	-0.172479	0.160148	0.256524	13.7089	14.2213	13.5576	16.051	15.1887	15.5166
ENSBTAG00000015781	ENSBTAT00000020955	0.0021933	0.667027	0.765664	6.24566	6.60219	7.88909	7.32041	8.08361	5.30143
ENSBTAG00000015776	ENSBTAT00000068268	0.497609	1.42687e-05	6.45759e-05	24.1604	24.1957	24.1235	19.4938	19.3585	12.4835
ENSBTAG00000017655	ENSBTAT00000081779	0.418007	1.16161e-06	6.15276e-06	7.55255	6.86676	6.70646	5.24113	5.38136	5.18925
ENSBTAG00000008737	ENSBTAT00000011514	0.263918	0.000226358	0.000830548	28.7767	28.6919	30.5631	24.931	27.2751	21.1086
ENSBTAG00000001393	ENSBTAT00000001831	-0.112425	0.63607	0.739911	3.79238	3.96961	4.16596	4.62145	4.39919	3.874
ENSBTAG00000002026	ENSBTAT00000002626	-0.504315	4.06357e-10	3.2055e-09	473.004	498.216	480.542	717.219	648.168	693.864
ENSBTAG00000018739	ENSBTAT00000067088	-0.114641	0.555516	0.669727	5.10549	4.46969	5.29421	5.24485	5.96575	4.88856
ENSBTAG00000006167	ENSBTAT00000008109	0.164775	0.0699744	0.129844	1.79755	1.74929	1.743	1.78323	1.55975	1.37591
ENSBTAG00000006167	ENSBTAT00000008109	0.164775	0.0699744	0.129844	1.79755	1.74929	1.743	1.78323	1.55975	1.37591
ENSBTAG00000006167	ENSBTAT00000008109	0.164775	0.0699744	0.129844	1.79755	1.74929	1.743	1.78323	1.55975	1.37591
ENSBTAG00000016307	ENSBTAT00000021696	-0.188233	0.187334	0.290883	6.41346	5.49053	5.75596	6.92233	7.28967	5.90916
ENSBTAG00000019133	ENSBTAT00000084549	0.0760543	0.0872015	0.156	23.8184	24.3867	25.47	25.0961	23.3914	21.4043
ENSBTAG00000019133	ENSBTAT00000084549	0.0760543	0.0872015	0.156	23.8184	24.3867	25.47	25.0961	23.3914	21.4043
ENSBTAG00000020958	ENSBTAT00000027912	0.295357	0.00295017	0.008342	4.95104	5.51545	4.47443	3.73772	4.25719	4.18002
ENSBTAG00000000900	ENSBTAT00000085971	-0.388653	9.6734e-05	0.000379444	6.3118	6.46924	6.43554	8.42487	8.80985	7.92306
ENSBTAG00000020214	ENSBTAT00000069929	-0.305207	0.177767	0.279298	0.764019	0.821426	0.921167	0.983974	1.15651	0.956676
ENSBTAG00000021900	ENSBTAT00000029201	0.0728785	0.0783668	0.142587	19.1481	19.0004	20.3567	18.6618	19.2212	17.7402
ENSBTAG00000021900	ENSBTAT00000029201	0.0728785	0.0783668	0.142587	19.1481	19.0004	20.3567	18.6618	19.2212	17.7402
ENSBTAG00000000305	ENSBTAT00000000389	0.000180606	0.41671	0.540842	69.3386	66.0059	66.0977	69.342	68.2352	63.8398
ENSBTAG00000017595	ENSBTAT00000023395	-0.0739681	0.89865	0.935113	7.175	7.21538	9.09098	8.73619	8.57825	7.40222
ENSBTAG00000009844	ENSBTAT00000074422	-0.683176	8.36193e-06	3.91103e-05	230.76	260.743	223.63	461.144	413.654	273.471
ENSBTAG00000012305	ENSBTAT00000016324	0.367108	4.85692e-09	3.40152e-08	14.2625	13.2823	14.8951	11.2645	11.028	10.6126
ENSBTAG00000012305	ENSBTAT00000078113	0.367108	4.85692e-09	3.40152e-08	14.2625	13.2823	14.8951	11.2645	11.028	10.6126
ENSBTAG00000015902	ENSBTAT00000043774	1.81495	1.09325e-66	7.34226e-65	9.5983	7.66307	9.52356	2.49764	2.70135	2.41366
ENSBTAG00000021752	ENSBTAT00000028994	0.759392	1.03714e-16	1.34265e-15	115.286	119.586	130.21	79.8005	76.5246	59.3455
ENSBTAG00000008921	ENSBTAT00000039125	0.321976	4.3985e-06	2.14301e-05	148.849	142.426	151.752	128.314	123.19	102.906
ENSBTAG00000008921	ENSBTAT00000039125	0.321976	4.3985e-06	2.14301e-05	148.849	142.426	151.752	128.314	123.19	102.906
ENSBTAG00000024240	ENSBTAT00000033470	-0.149315	0.325632	0.44844	17.5273	16.3748	16.6656	19.9687	20.1808	15.9324
ENSBTAG00000013860	ENSBTAT00000033450	-0.00391325	0.493885	0.61576	168.307	169.308	170.568	159.411	167.272	182.88
ENSBTAG00000005443	ENSBTAT00000076759	-0.0313108	0.75507	0.831247	12.9504	12.5403	13.4492	12.6607	14.2872	12.8463
ENSBTAG00000005443	ENSBTAT00000007161	-0.0313108	0.75507	0.831247	12.9504	12.5403	13.4492	12.6607	14.2872	12.8463
ENSBTAG00000016455	ENSBTAT00000021878	0.131676	0.177472	0.278944	1.50692	1.65621	1.79527	1.69498	1.2721	1.5588
ENSBTAG00000045168	ENSBTAT00000062601	inf	1	1	0.056175	0.008038	0.070653	0	0	0
ENSBTAG00000010124	ENSBTAT00000013356	-0.152201	0.436908	0.560711	6.59032	6.33078	6.78875	7.52348	8.48764	5.89173
ENSBTAG00000020451	ENSBTAT00000027254	-0.448572	1.6113e-05	7.21787e-05	16.7266	14.6313	14.7318	21.9237	22.6393	18.3352
ENSBTAG00000020451	ENSBTAT00000027254	-0.448572	1.6113e-05	7.21787e-05	16.7266	14.6313	14.7318	21.9237	22.6393	18.3352
ENSBTAG00000000074	ENSBTAT00000033431	-0.672546	6.099e-05	0.00024771	0.861385	0.829495	1.05853	1.53342	1.37139	1.47743
ENSBTAG00000015931	ENSBTAT00000021186	0.0718848	0.161514	0.258304	12.8475	11.3452	13.4156	12.4381	10.729	12.6133
ENSBTAG00000015931	ENSBTAT00000021186	0.0718848	0.161514	0.258304	12.8475	11.3452	13.4156	12.4381	10.729	12.6133
ENSBTAG00000014649	ENSBTAT00000019505	-0.104437	0.492246	0.614032	32.7185	32.9851	31.8158	35.4836	35.5949	33.7622
ENSBTAG00000054697	ENSBTAT00000085796	0.245344	0.013579	0.0320264	4.39405	3.59364	4.45822	3.48227	3.6097	3.40758
ENSBTAG00000019680	ENSBTAT00000082754	-0.129377	0.373329	0.498371	8.92347	8.7027	9.51964	9.73255	10.3408	9.61933
ENSBTAG00000014289	ENSBTAT00000063202	0.222738	0.000334907	0.0011845	10.306	9.02936	9.9288	8.49415	8.46359	8.11978
ENSBTAG00000011025	ENSBTAT00000014646	-0.187589	0.15008	0.243445	27.3313	25.6199	28.9965	33.8814	32.3863	27.0591
ENSBTAG00000054545	ENSBTAT00000086641	0.0208958	0.337645	0.460973	28.2392	25.4377	27.7031	27.8785	28.2046	24.1266
ENSBTAG00000052979	ENSBTAT00000076519	-0.112276	0.6556	0.75626	9.33975	11.0705	9.90611	11.0127	11.2988	10.4585
ENSBTAG00000011243	ENSBTAT00000043071	-0.385992	0.00245381	0.00708515	3.08144	3.37654	2.98653	3.93622	4.07577	4.32971
ENSBTAG00000000253	ENSBTAT00000087285	0.461167	2.20058e-13	2.29419e-12	30.1975	29.8489	29.6448	20.6132	22.069	22.4693
ENSBTAG00000017386	ENSBTAT00000023118	-0.22587	0.180781	0.282865	12.7888	10.6748	14.7103	15.0365	14.5476	15.0595
ENSBTAG00000004590	ENSBTAT00000077412	-0.377022	0.00053565	0.00181274	8.22452	8.90808	8.99063	12.0054	10.4376	11.4822
ENSBTAG00000012982	ENSBTAT00000017259	0.0227423	0.570454	0.683129	6.99379	7.0209	6.79526	7.17482	6.26891	7.04074
ENSBTAG00000002644	ENSBTAT00000078501	0.388954	0.0885509	0.158112	1.23627	0.82297	0.595903	0.647307	0.573932	0.806445
ENSBTAG00000000533	ENSBTAT00000076025	-0.238195	1	1	0.404414	0.532855	0.766594	0.637234	0.724193	0.648308
ENSBTAG00000000533	ENSBTAT00000076025	-0.238195	1	1	0.404414	0.532855	0.766594	0.637234	0.724193	0.648308
ENSBTAG00000000532	ENSBTAT00000000690	0.0183149	0.608059	0.715682	3.22731	3.13818	3.5274	3.40284	3.56841	2.79685
ENSBTAG00000039287	ENSBTAT00000052349	0.137286	0.066922	0.125212	9.78554	8.95901	9.31548	8.74047	9.01354	7.75895
ENSBTAG00000044178	ENSBTAT00000061030	-0.0364132	0.84599	0.898153	18.3763	16.7375	19.193	19.3781	21.0707	15.2462
ENSBTAG00000019695	ENSBTAT00000026252	0.137472	0.0441057	0.088284	5.58167	5.0755	5.49847	5.09177	5.38497	4.21053
ENSBTAG00000019695	ENSBTAT00000026252	0.137472	0.0441057	0.088284	5.58167	5.0755	5.49847	5.09177	5.38497	4.21053
ENSBTAG00000019695	ENSBTAT00000026252	0.137472	0.0441057	0.088284	5.58167	5.0755	5.49847	5.09177	5.38497	4.21053
ENSBTAG00000019695	ENSBTAT00000026252	0.137472	0.0441057	0.088284	5.58167	5.0755	5.49847	5.09177	5.38497	4.21053
ENSBTAG00000013363	ENSBTAT00000017775	-0.0807346	0.727279	0.810414	166.222	172.837	176.864	187.956	185.727	171.935
ENSBTAG00000013054	ENSBTAT00000017353	0.0891422	0.188059	0.291698	3.43	3.62296	3.58884	3.24882	3.45288	3.30246
ENSBTAG00000021024	ENSBTAT00000087050	0.64744	2.12208e-17	2.88546e-16	55.8914	47.1648	56.903	31.8646	36.56	33.6953
ENSBTAG00000021024	ENSBTAT00000087050	0.64744	2.12208e-17	2.88546e-16	55.8914	47.1648	56.903	31.8646	36.56	33.6953
ENSBTAG00000004715	ENSBTAT00000006186	-0.00463012	0.53442	0.651981	20.4307	19.598	19.968	20.0128	22.4867	17.69
ENSBTAG00000002306	ENSBTAT00000002976	-0.113936	0.59495	0.704002	22.4551	20.0969	23.1189	26.0781	25.8844	19.1052
ENSBTAG00000014326	ENSBTAT00000019049	-3.51161	4.4408e-52	2.2215e-50	0.665936	0.827642	0.350313	6.48929	7.76024	6.78031
ENSBTAG00000024095	ENSBTAT00000069875	-0.287483	0.00295961	0.00836481	49.5446	52.9576	58.9993	67.5993	66.6458	62.869
ENSBTAG00000021715	ENSBTAT00000028950	-0.0983131	0.682932	0.777916	9.47812	9.23868	10.2316	10.8339	9.38753	10.7684
ENSBTAG00000018324	ENSBTAT00000073962	0.302136	0.00325488	0.00909361	2.90246	2.32952	3.06913	2.07545	2.31724	2.33993
ENSBTAG00000012253	ENSBTAT00000067110	-0.277918	0.0023243	0.00675453	7.58933	6.90388	7.74928	9.17817	9.02541	8.76418
ENSBTAG00000021023	ENSBTAT00000084859	-0.0470053	0.906744	0.940155	5.79893	5.524	5.89718	5.73074	6.33141	5.72827
ENSBTAG00000006555	ENSBTAT00000073613	-0.335834	0.0362359	0.074532	3.67411	3.04785	4.04269	4.66688	5.24759	3.67167
ENSBTAG00000053153	ENSBTAT00000084119	-0.0722285	0.896568	0.933585	7.61184	7.10974	6.6297	6.70183	7.36843	8.37719
ENSBTAG00000049314	ENSBTAT00000067790	-0.649661	1	1	0.027899	0.05917	0.135519	0.169867	0.072385	0.106944
ENSBTAG00000000784	ENSBTAT00000085288	-0.0514777	0.969657	0.98232	9.56955	9.7267	10.2142	10.5572	10.4643	9.56083
ENSBTAG00000000785	ENSBTAT00000001044	-0.0311496	0.890985	0.929285	0.790846	0.691817	0.624408	0.812072	0.728096	0.612892
ENSBTAG00000017086	ENSBTAT00000081071	-0.227028	0.0150874	0.0351698	17.4218	17.5927	18.2027	21.6383	20.3374	20.3109
ENSBTAG00000001500	ENSBTAT00000001962	-1.16687	1.70699e-09	1.25835e-08	0.93019	1.02586	0.835035	2.24759	2.22216	1.79689
ENSBTAG00000002107	ENSBTAT00000002720	1.42862	8.22921e-97	1.03128e-94	47.5421	44.1594	48.5915	17.2029	17.9149	16.999
ENSBTAG00000002107	ENSBTAT00000002720	1.42862	8.22921e-97	1.03128e-94	47.5421	44.1594	48.5915	17.2029	17.9149	16.999
ENSBTAG00000027319	ENSBTAT00000039166	-0.183356	0.237598	0.351538	6.80311	6.15663	6.00097	7.0414	7.65644	6.83247
ENSBTAG00000007442	ENSBTAT00000069177	0.392102	1.1719e-08	7.9142e-08	6.08777	5.66315	6.11198	4.71204	4.77888	4.12094
ENSBTAG00000007442	ENSBTAT00000069177	0.392102	1.1719e-08	7.9142e-08	6.08777	5.66315	6.11198	4.71204	4.77888	4.12094
ENSBTAG00000007442	ENSBTAT00000069177	0.392102	1.1719e-08	7.9142e-08	6.08777	5.66315	6.11198	4.71204	4.77888	4.12094
ENSBTAG00000034936	ENSBTAT00000061475	-0.0193611	0.646484	0.748301	15.3107	13.7024	15.5149	14.9901	16.3885	13.7509
ENSBTAG00000018363	ENSBTAT00000024429	0.155128	0.0854089	0.153312	5.51039	5.16061	5.36228	5.24136	4.92143	4.23595
ENSBTAG00000000820	ENSBTAT00000001086	-0.167785	0.181528	0.283748	38.4401	37.2654	37.918	44.6369	42.5969	40.4031
ENSBTAG00000013472	ENSBTAT00000033863	-0.0667963	0.869009	0.913734	5764.13	5234.32	5490.58	5746.47	5769.66	5754.28
ENSBTAG00000053735	ENSBTAT00000080204	-0.926049	8.57617e-36	2.70083e-34	25.7154	23.8031	24.5349	47.7592	48.1682	44.7791
ENSBTAG00000053735	ENSBTAT00000080204	-0.926049	8.57617e-36	2.70083e-34	25.7154	23.8031	24.5349	47.7592	48.1682	44.7791
ENSBTAG00000053735	ENSBTAT00000080204	-0.926049	8.57617e-36	2.70083e-34	25.7154	23.8031	24.5349	47.7592	48.1682	44.7791
ENSBTAG00000053735	ENSBTAT00000080204	-0.926049	8.57617e-36	2.70083e-34	25.7154	23.8031	24.5349	47.7592	48.1682	44.7791
ENSBTAG00000024426	ENSBTAT00000070279	0.548441	4.00758e-06	1.96912e-05	1.4745	1.45378	1.61662	0.99556	1.0592	1.05285
ENSBTAG00000024426	ENSBTAT00000070279	0.548441	4.00758e-06	1.96912e-05	1.4745	1.45378	1.61662	0.99556	1.0592	1.05285
ENSBTAG00000015925	ENSBTAT00000021172	-0.228768	0.265782	0.383742	4.53397	4.09528	5.33958	5.35777	5.1926	5.81878
ENSBTAG00000004995	ENSBTAT00000068688	0.359041	3.20796e-06	1.60214e-05	15.2514	14.6894	16.5101	12.5862	12.67	10.9606
ENSBTAG00000054892	ENSBTAT00000081963	-0.176292	1	1	0.039079	0.037517	0.038702	0.042119	0.045247	0.042918
ENSBTAG00000002869	ENSBTAT00000003722	0.442732	0.000429768	0.00149009	7.33998	6.00593	7.01808	5.32154	5.18344	4.47763
ENSBTAG00000014389	ENSBTAT00000019135	-0.0602841	0.976488	0.986904	1.80088	2.07867	1.90411	1.97542	2.05	2.00504
ENSBTAG00000016014	ENSBTAT00000021317	-0.219014	0.204894	0.312078	7.60944	6.90716	9.38883	9.72479	9.39301	8.70662
ENSBTAG00000000604	ENSBTAT00000000796	1.0044	4.80161e-52	2.38238e-50	47.2424	44.464	47.9408	23.4543	23.2029	22.9538
ENSBTAG00000019403	ENSBTAT00000080331	-0.182133	0.389696	0.514795	2.15227	2.00965	1.9878	2.0231	2.50663	2.4475
ENSBTAG00000013010	ENSBTAT00000074740	0.058066	0.559172	0.673206	1.38557	1.39642	0.995258	1.09203	1.21753	1.31869
ENSBTAG00000024394	ENSBTAT00000061438	-0.581316	1.76691e-12	1.73915e-11	33.5639	36.1817	38.4367	55.9944	53.2212	52.6484
ENSBTAG00000018133	ENSBTAT00000080859	-0.464118	1.64912e-07	9.75506e-07	12.7263	12.6581	13.7361	18.452	18.8523	16.6616
ENSBTAG00000014920	ENSBTAT00000019866	2.4785	6.58534e-59	3.96294e-57	2.94369	3.44685	3.13174	0.600833	0.573159	0.5346
ENSBTAG00000006138	ENSBTAT00000008076	1.35795	1.88373e-91	2.16025e-89	98.4244	100.563	104.968	39.4798	39.2159	39.8879
ENSBTAG00000033290	ENSBTAT00000047310	-0.00932285	0.720728	0.805254	13.8997	10.6634	11.5327	12.8803	11.8873	11.5621
ENSBTAG00000014161	ENSBTAT00000084299	0.0396876	0.322293	0.4449	13.763	12.9876	15.1815	12.4075	14.5021	13.8847
ENSBTAG00000009207	ENSBTAT00000086538	-0.00508911	0.468852	0.591712	15.3499	14.8835	15.092	14.7132	16.0985	14.6738
ENSBTAG00000033197	ENSBTAT00000047158	-0.872439	5.97887e-15	6.96161e-14	4.11431	3.9745	3.82636	7.62852	7.33482	6.85042
ENSBTAG00000021469	ENSBTAT00000083298	0.0881825	0.090561	0.160944	4.54454	4.62603	5.07977	4.38981	4.57557	4.44001
ENSBTAG00000008097	ENSBTAT00000010650	0.356853	0.000517913	0.00176006	5.63251	4.95434	5.01349	3.67766	4.41693	4.08718
ENSBTAG00000006733	ENSBTAT00000008851	3.42332	9.48002e-161	3.71739e-158	9.38806	9.4335	9.44729	0.800156	1.08475	0.750121
ENSBTAG00000006733	ENSBTAT00000008851	3.42332	9.48002e-161	3.71739e-158	9.38806	9.4335	9.44729	0.800156	1.08475	0.750121
ENSBTAG00000007608	ENSBTAT00000010002	0.0101385	0.53417	0.65188	5.67006	4.62454	5.46314	5.24911	5.48849	4.90979
ENSBTAG00000021967	ENSBTAT00000029286	-0.102293	0.646248	0.748099	8.08149	7.39425	8.34849	8.31556	9.75254	7.50669
ENSBTAG00000002011	ENSBTAT00000002605	1.05851	1.97913e-10	1.61682e-09	2.44362	2.15499	2.30048	1.0654	1.32644	0.920601
ENSBTAG00000015105	ENSBTAT00000020101	0.395293	4.2191e-08	2.674e-07	24.059	25.9529	27.0946	19.8865	20.9298	17.8105
ENSBTAG00000017541	ENSBTAT00000023312	0.179835	0.0483357	0.0953071	5.24069	4.72775	4.8358	4.03464	4.62976	4.40483
ENSBTAG00000016709	ENSBTAT00000033700	-0.235892	0.253007	0.369392	5.37421	3.76269	5.19398	6.29889	5.98025	4.5974
ENSBTAG00000003115	ENSBTAT00000004051	0.113583	0.0462252	0.0917709	17.1719	16.0772	17.5394	16.5487	16.3503	14.0443
ENSBTAG00000007870	ENSBTAT00000082931	-0.154252	0.228051	0.339771	13.9482	12.9903	13.673	15.6833	16.1783	13.3328
ENSBTAG00000005726	ENSBTAT00000007527	-0.559712	4.56079e-12	4.34831e-11	265.6	262.784	269.428	425.988	380.974	368.993
ENSBTAG00000003506	ENSBTAT00000004557	1.05822	5.7408e-17	7.58535e-16	8.00162	5.88739	8.51375	3.69721	3.55892	3.50221
ENSBTAG00000003506	ENSBTAT00000004557	1.05822	5.7408e-17	7.58535e-16	8.00162	5.88739	8.51375	3.69721	3.55892	3.50221
ENSBTAG00000009655	ENSBTAT00000076803	0.805414	2.89931e-30	7.19265e-29	7.6464	8.00005	7.71386	4.3058	4.48101	4.57991
ENSBTAG00000052945	ENSBTAT00000075704	-0.303505	0.0148291	0.0346526	9.31446	8.95503	10.3509	11.2305	13.5709	10.5202
ENSBTAG00000009472	ENSBTAT00000079426	0.198308	0.0206433	0.0458757	7.11591	7.1724	7.65131	7.07711	6.04109	6.00377
ENSBTAG00000018715	ENSBTAT00000024911	0.204369	0.00882242	0.02199	16.2745	18.8475	17.2647	15.5969	15.5077	14.3627
ENSBTAG00000016332	ENSBTAT00000021725	-0.0590522	0.985787	0.992647	5.08153	4.53792	4.71043	5.47161	5.17139	4.28559
ENSBTAG00000002938	ENSBTAT00000003820	-0.162148	0.303586	0.424699	5.21306	5.06382	5.38985	5.83448	6.62839	5.06745
ENSBTAG00000024291	ENSBTAT00000033556	0.543009	0.00325654	0.00909617	1.1033	0.960441	0.999572	0.704902	0.63702	0.760547
ENSBTAG00000016481	ENSBTAT00000021909	-0.0170892	0.569148	0.681901	291.288	294.177	301.218	311.766	307.862	277.621
ENSBTAG00000051697	ENSBTAT00000081436	-0.529871	8.75732e-09	6.00079e-08	25.021	23.2643	23.6749	35.6107	32.4779	35.8076
ENSBTAG00000000548	ENSBTAT00000077244	0.00953583	0.437686	0.561532	16.2032	16.1699	16.062	15.2868	16.1816	16.6476
ENSBTAG00000011127	ENSBTAT00000044609	-0.422612	2.28123e-07	1.33001e-06	9.16352	8.968	9.54003	12.7541	12.6039	11.7316
ENSBTAG00000002431	ENSBTAT00000003151	0.18583	0.0099064	0.0243179	7.01864	7.20608	7.59412	6.16068	7.04965	5.97156
ENSBTAG00000014021	ENSBTAT00000076117	0.321865	0.000146649	0.000557442	3.61993	3.54561	3.66333	2.87007	2.98286	2.81055
ENSBTAG00000014021	ENSBTAT00000076117	0.321865	0.000146649	0.000557442	3.61993	3.54561	3.66333	2.87007	2.98286	2.81055
ENSBTAG00000008736	ENSBTAT00000068449	-0.14504	0.335637	0.459121	25.7064	23.2611	29.1222	29.5456	31.3045	25.4983
ENSBTAG00000006022	ENSBTAT00000007912	0.0538698	0.365908	0.490297	5.87294	7.15869	5.72676	6.11538	5.94426	6.01122
ENSBTAG00000014402	ENSBTAT00000019150	0.501119	0.000126495	0.000486761	2.79822	3.27223	3.00019	2.12785	2.34877	1.93232
ENSBTAG00000014371	ENSBTAT00000019108	0.140619	0.0243545	0.0529897	13.6264	13.5252	13.5907	12.0633	11.572	13.3233
ENSBTAG00000036355	ENSBTAT00000050855	-0.119723	1	1	0.077043	0.091265	0.086874	0.084239	0.102973	0.09005
ENSBTAG00000004540	ENSBTAT00000005970	0.255246	1.92524e-05	8.50716e-05	23.477	24.2631	24.5277	20.6291	20.2056	19.7144
ENSBTAG00000008032	ENSBTAT00000038295	-0.23155	0.140436	0.231012	3.72624	3.44871	3.96566	4.20132	4.21322	4.66559
ENSBTAG00000001592	ENSBTAT00000069908	1.15315	2.21597e-22	3.92101e-21	5.52036	5.05578	4.51233	2.06855	2.52653	2.18934
ENSBTAG00000045617	ENSBTAT00000063130	0.0862576	0.240113	0.354573	4.50031	3.99751	4.74188	4.69507	3.94267	3.83357
ENSBTAG00000045617	ENSBTAT00000063130	0.0862576	0.240113	0.354573	4.50031	3.99751	4.74188	4.69507	3.94267	3.83357
ENSBTAG00000002750	ENSBTAT00000003566	0.0779211	0.108303	0.186293	11.666	10.6459	11.7912	11.3063	10.8445	10.1592
ENSBTAG00000050705	ENSBTAT00000080299	-0.0690927	0.929442	0.955701	10.705	10.1897	10.3727	11.4261	11.9921	9.38303
ENSBTAG00000053050	ENSBTAT00000071205	0.280837	0.00435848	0.0117947	1.69553	1.75585	1.72615	1.43932	1.49354	1.32882
ENSBTAG00000053050	ENSBTAT00000071205	0.280837	0.00435848	0.0117947	1.69553	1.75585	1.72615	1.43932	1.49354	1.32882
ENSBTAG00000003773	ENSBTAT00000004912	-0.294765	0.0179036	0.040693	3.95294	3.91767	3.95301	4.97278	4.67884	4.85224
ENSBTAG00000010980	ENSBTAT00000014576	-0.0259126	0.754546	0.830992	12.0988	12.3895	13.3295	13.4632	14.1583	10.8817
ENSBTAG00000014074	ENSBTAT00000018702	0.0387646	0.192012	0.296694	15.5837	15.0067	15.8467	14.8805	15.8965	14.4289
ENSBTAG00000046922	ENSBTAT00000065629	-1.35569	1.70338e-40	6.23683e-39	20.0638	19.3865	20.9817	54.4535	57.1388	43.0654
ENSBTAG00000006721	ENSBTAT00000047621	-0.835104	1.81838e-19	2.76303e-18	17.3974	19.464	20.4198	35.4244	33.3964	33.368
ENSBTAG00000051150	ENSBTAT00000070920	-0.516531	0.000908886	0.00291515	58.1931	55.5104	56.4828	70.5384	68.2938	104.621
ENSBTAG00000004575	ENSBTAT00000067056	-0.495302	2.91372e-09	2.09581e-08	32.9164	31.3705	36.0591	46.3248	49.4265	45.698
ENSBTAG00000014711	ENSBTAT00000019578	-0.909091	1.15298e-12	1.14695e-11	3.25024	3.66168	3.36172	7.11842	6.39929	5.77479
ENSBTAG00000017866	ENSBTAT00000080828	1.35249	6.11878e-09	4.25514e-08	0.586708	0.501846	0.678734	0.241188	0.28791	0.163
ENSBTAG00000052433	ENSBTAT00000078079	-0.370097	1	1	0.089184	0.028296	0.109507	0.065189	0.154581	0.073597
ENSBTAG00000003825	ENSBTAT00000068950	-0.0506549	0.941657	0.963668	14.7041	14.9776	15.8588	15.995	17.0948	14.0781
ENSBTAG00000014161	ENSBTAT00000018822	0.0396876	0.322293	0.4449	13.763	12.9876	15.1815	12.4075	14.5021	13.8847
ENSBTAG00000003784	ENSBTAT00000004925	-0.186779	0.147658	0.240381	34.1074	28.2082	35.4922	37.4409	39.9328	33.9531
ENSBTAG00000011412	ENSBTAT00000015166	0.305601	2.97453e-08	1.91924e-07	143.599	139.352	141.408	114.891	116.999	111.46
ENSBTAG00000024387	ENSBTAT00000017658	0.0346408	0.288131	0.408381	13.2591	12.3036	12.4575	12.7588	12.9127	11.4467
ENSBTAG00000024387	ENSBTAT00000017658	0.0346408	0.288131	0.408381	13.2591	12.3036	12.4575	12.7588	12.9127	11.4467
ENSBTAG00000006161	ENSBTAT00000008102	-1.5949	6.98111e-78	6.2861e-76	3.59295	3.67312	4.085	11.533	11.5346	11.2209
ENSBTAG00000006161	ENSBTAT00000008102	-1.5949	6.98111e-78	6.2861e-76	3.59295	3.67312	4.085	11.533	11.5346	11.2209
ENSBTAG00000017869	ENSBTAT00000023751	0.483748	1.71977e-11	1.55431e-10	146.994	131.737	158.465	107.852	108.277	96.5174
ENSBTAG00000011246	ENSBTAT00000014933	0.316915	0.00539845	0.0142412	3.16312	3.12956	3.16104	2.88436	2.34404	2.3609
ENSBTAG00000010555	ENSBTAT00000013956	-0.224445	0.412588	0.536638	1.98137	2.41288	2.37764	2.15178	3.16081	2.59919
ENSBTAG00000004398	ENSBTAT00000005770	-0.510782	0.00075947	0.00247908	10.3366	9.27542	9.97463	14.0453	14.2481	13.8623
ENSBTAG00000004399	ENSBTAT00000005771	-0.590388	9.02074e-05	0.000354759	3.27674	3.65859	2.89729	5.0777	5.29214	4.43467
ENSBTAG00000046588	ENSBTAT00000064412	0.219529	0.00520466	0.0137801	22.4465	19.8902	24.7165	19.5352	21.1927	16.8605
ENSBTAG00000019065	ENSBTAT00000033712	1.00807	2.85715e-23	5.26236e-22	6.58276	6.42555	5.74802	3.13599	3.10881	3.08104
ENSBTAG00000001182	ENSBTAT00000046363	0.177809	0.00768789	0.0194534	141.928	137.739	144.192	134.52	134.642	105.549
ENSBTAG00000000260	ENSBTAT00000000325	-0.244639	0.123944	0.208189	4.85976	5.68379	5.2773	6.7984	6.18955	5.75654
ENSBTAG00000052317	ENSBTAT00000081374	1.69407	5.16611e-80	4.94482e-78	36.4196	34.9171	33.8344	10.3275	10.4467	11.7295
ENSBTAG00000020931	ENSBTAT00000027880	0.982458	2.19794e-21	3.74729e-20	8.61346	9.56832	8.98984	4.69391	4.57447	4.48362
ENSBTAG00000018909	ENSBTAT00000068556	-1.26989	3.25436e-22	5.75001e-21	0.686455	0.630728	0.777026	1.73215	1.80059	1.51729
ENSBTAG00000015303	ENSBTAT00000020351	-0.179921	0.291532	0.411838	4.53784	4.29782	5.27587	5.02192	5.72045	5.24348
ENSBTAG00000011997	ENSBTAT00000015917	0.409452	1.93192e-07	1.13223e-06	7.2504	8.32008	7.20284	5.6422	5.51262	5.99143
ENSBTAG00000006029	ENSBTAT00000007922	0.081599	0.182233	0.284586	17.9744	22.1776	16.5918	17.3695	17.0821	19.1718
ENSBTAG00000000274	ENSBTAT00000000341	0.219982	7.38908e-05	0.000295297	98.716	91.4559	100.753	83.0783	82.4705	84.2323
ENSBTAG00000008143	ENSBTAT00000010704	-0.257026	0.0213027	0.0471943	13.3237	11.9446	13.4729	15.8725	15.8929	14.5307
ENSBTAG00000000991	ENSBTAT00000001313	-0.319691	0.0259369	0.0559777	16.9267	13.7984	17.8419	20.5071	18.9703	21.1372
ENSBTAG00000001528	ENSBTAT00000002003	-0.0686289	0.865498	0.911303	7.0934	7.15555	7.28498	7.5435	7.73969	7.29987
ENSBTAG00000001528	ENSBTAT00000002003	-0.0686289	0.865498	0.911303	7.0934	7.15555	7.28498	7.5435	7.73969	7.29987
ENSBTAG00000001892	ENSBTAT00000002462	-0.147475	0.422471	0.546163	5.6509	5.23432	6.06172	6.04579	6.02611	6.69902
ENSBTAG00000015337	ENSBTAT00000020385	-0.280135	0.104995	0.181605	1.70113	1.78129	1.6302	2.03175	1.9946	2.18195
ENSBTAG00000009334	ENSBTAT00000012287	-0.257581	0.0316101	0.066091	34.5658	37.5872	41.5755	48.5594	42.5285	44.8713
ENSBTAG00000020004	ENSBTAT00000084622	-0.0205101	0.711622	0.798899	8.43306	7.66073	8.16486	8.58119	8.88798	7.13681
ENSBTAG00000017001	ENSBTAT00000022610	-0.0971484	0.606034	0.713921	8.36738	7.79302	8.27605	9.19051	8.58444	8.36368
ENSBTAG00000011247	ENSBTAT00000014941	-0.361772	8.49579e-05	0.000335526	15.4458	15.0272	14.6564	19.6415	19.8319	18.5181
ENSBTAG00000003372	ENSBTAT00000004376	-0.454002	0.00995939	0.0244381	3.51021	2.68223	3.35256	4.25615	4.67058	4.14833
ENSBTAG00000001773	ENSBTAT00000002323	-0.0796476	0.852445	0.901856	5.72789	5.63516	5.75363	6.07615	5.77327	6.2388
ENSBTAG00000002317	ENSBTAT00000002983	0.0593565	0.134387	0.222927	486.427	492.62	491.743	491.94	501.921	417.645
ENSBTAG00000002317	ENSBTAT00000002983	0.0593565	0.134387	0.222927	486.427	492.62	491.743	491.94	501.921	417.645
ENSBTAG00000012239	ENSBTAT00000083884	0.145103	0.0295879	0.0624754	4.85014	4.56614	5.35501	4.75668	4.5444	4.05682
ENSBTAG00000012239	ENSBTAT00000083884	0.145103	0.0295879	0.0624754	4.85014	4.56614	5.35501	4.75668	4.5444	4.05682
ENSBTAG00000008306	ENSBTAT00000010932	-0.00641143	0.651936	0.752534	9.01749	9.05621	9.0669	9.83643	8.15389	9.27117
ENSBTAG00000005285	ENSBTAT00000006954	-0.275255	0.00933906	0.0230931	34.1867	32.8036	35.1954	43.7313	40.6633	39.2714
ENSBTAG00000002554	ENSBTAT00000057182	-0.193317	0.103188	0.179244	12.9902	11.1248	11.8618	14.2146	14.6271	12.2939
ENSBTAG00000017143	ENSBTAT00000022782	-0.823144	4.99829e-28	1.13569e-26	87.5154	89.9869	86.0323	153.295	153.068	159.898
ENSBTAG00000014768	ENSBTAT00000019646	-0.140022	0.451745	0.574656	5.47602	5.40728	5.11886	5.74528	6.42983	5.45801
ENSBTAG00000014768	ENSBTAT00000019646	-0.140022	0.451745	0.574656	5.47602	5.40728	5.11886	5.74528	6.42983	5.45801
ENSBTAG00000031861	ENSBTAT00000006102	0.294968	2.10382e-06	1.07816e-05	57.8344	53.8532	56.9135	45.4695	48.4898	43.4658
ENSBTAG00000002917	ENSBTAT00000079692	-0.190138	0.0782815	0.14256	11.4033	11.0224	12.636	13.593	13.2498	13.1582
ENSBTAG00000024199	ENSBTAT00000028347	0.145827	0.0220555	0.0486495	4.10744	3.93258	4.28052	3.31858	3.72461	4.09286
ENSBTAG00000013256	ENSBTAT00000017631	2.99719	1.17743e-162	5.11175e-160	9.09025	8.09807	8.77515	1.12713	1.17953	0.94511
ENSBTAG00000012272	ENSBTAT00000016277	-0.129199	0.405199	0.529977	12.3862	11.293	12.7558	13.4241	14.4668	11.9577
ENSBTAG00000053598	ENSBTAT00000086555	0.246968	0.00122752	0.00381047	13.9889	14.1779	13.3099	12.3023	12.4862	10.1624
ENSBTAG00000035083	ENSBTAT00000049560	0.085751	0.0527553	0.102673	36.0909	33.3511	36.4453	34.0251	34.9326	30.8192
ENSBTAG00000008382	ENSBTAT00000011034	-0.0650312	0.96869	0.982019	1.91322	1.7932	1.93254	2.11156	1.91211	1.87529
ENSBTAG00000044874	ENSBTAT00000062307	0	1	1	NA	NA	NA	NA	NA	NA
ENSBTAG00000009023	ENSBTAT00000011881	0.255606	0.00228399	0.00664691	13.6747	13.0005	15.2807	12.149	13.2085	9.78626
ENSBTAG00000049773	ENSBTAT00000082415	0.487905	1	1	5.92001	6.11143	4.54842	2.27913	5.47069	4.07262
ENSBTAG00000007447	ENSBTAT00000009797	0.655925	1.16019e-16	1.49876e-15	42.0786	39.867	45.8534	28.5983	28.8622	23.6494
ENSBTAG00000052916	ENSBTAT00000086712	0.434734	0.0179222	0.0407219	11.0004	9.61165	12.1326	9.32766	7.99379	6.90404
ENSBTAG00000053941	ENSBTAT00000077325	-0.300123	1	1	0.210706	0.058653	0	0.103538	0.160474	0.067636
ENSBTAG00000019944	ENSBTAT00000026568	-0.131768	0.291485	0.411819	58.2803	58.7827	60.9904	69.1271	63.6817	62.2729
ENSBTAG00000001562	ENSBTAT00000002043	-0.0056839	1	1	0	0.156561	0.0665605	0.0753991	0.0776482	0.0709552
ENSBTAG00000052501	ENSBTAT00000086710	0	1	1	NA	NA	NA	NA	NA	NA
ENSBTAG00000020758	ENSBTAT00000061092	-0.0432289	0.893763	0.931383	6.22598	6.5747	5.5049	6.43556	6.31299	6.11383
ENSBTAG00000010928	ENSBTAT00000014517	0.205483	0.0204465	0.0454882	7.10668	7.57008	7.70384	6.01885	6.19256	7.19814
ENSBTAG00000032914	ENSBTAT00000068742	0.0833846	0.0731306	0.134734	8.03787	7.48919	8.20545	7.45845	7.49604	7.44521
ENSBTAG00000012342	ENSBTAT00000016376	-0.397547	3.2466e-06	1.62077e-05	114.248	119.557	123.174	162.335	163.47	144.433
ENSBTAG00000012342	ENSBTAT00000016376	-0.397547	3.2466e-06	1.62077e-05	114.248	119.557	123.174	162.335	163.47	144.433
ENSBTAG00000012784	ENSBTAT00000016988	-1.40238	1.87293e-68	1.28629e-66	6.34632	7.03132	7.13287	18.6036	18.1493	17.4639
ENSBTAG00000017781	ENSBTAT00000023645	-0.0765179	0.870403	0.914832	4.55039	4.65678	4.94776	4.82982	4.96737	5.12876
ENSBTAG00000014429	ENSBTAT00000019193	-0.0350767	0.788652	0.857568	4.84907	4.77093	4.84625	4.46516	5.27268	5.08444
ENSBTAG00000014429	ENSBTAT00000019193	-0.0350767	0.788652	0.857568	4.84907	4.77093	4.84625	4.46516	5.27268	5.08444
ENSBTAG00000015825	ENSBTAT00000021022	-0.539642	0.0631085	0.119492	0.550946	0.45278	0.456005	0.510526	0.856961	0.754395
ENSBTAG00000021810	ENSBTAT00000029071	-0.0823245	0.719624	0.804538	22.7525	24.0092	23.1828	24.8156	23.6898	25.5464
ENSBTAG00000005861	ENSBTAT00000007703	0.0654113	0.226688	0.33832	5.62384	5.47123	6.36153	5.2986	5.73459	5.64961
ENSBTAG00000000289	ENSBTAT00000000361	-0.106291	0.568547	0.681419	11.1555	10.4172	11.1039	12.5411	11.8757	10.7583
ENSBTAG00000018690	ENSBTAT00000024878	-0.121923	0.525317	0.64392	9.63772	8.32261	9.91496	11.4648	9.64445	9.22417
ENSBTAG00000001810	ENSBTAT00000070393	0.0898242	0.079231	0.143858	22.3705	20.801	23.4135	21.2687	22.8681	18.429
ENSBTAG00000001810	ENSBTAT00000070393	0.0898242	0.079231	0.143858	22.3705	20.801	23.4135	21.2687	22.8681	18.429
ENSBTAG00000032183	ENSBTAT00000045616	-0.474742	1.94947e-09	1.42586e-08	17.8571	18.2403	18.4675	26.0865	25.0974	24.6434
ENSBTAG00000004718	ENSBTAT00000045587	-0.18427	0.392532	0.517642	4.39282	3.65214	4.08367	5.13108	5.16036	3.48961
ENSBTAG00000019119	ENSBTAT00000025452	-0.138805	0.421485	0.545467	27.6327	28.1371	28.6902	35.1393	31.7283	26.1224
ENSBTAG00000043962	ENSBTAT00000061504	0.194193	0.0365681	0.0751389	7.512	7.58609	7.46122	6.54075	7.60652	5.57097
ENSBTAG00000004832	ENSBTAT00000006351	-0.171448	0.520532	0.639991	0.375981	0.429042	0.43168	0.497234	0.462975	0.432551
ENSBTAG00000013496	ENSBTAT00000072626	0.73976	4.93561e-08	3.10384e-07	2.23993	1.88008	2.33611	1.45899	1.30851	1.09867
ENSBTAG00000002004	ENSBTAT00000002597	-0.363031	0.00232567	0.00675688	25.0486	20.9367	26.8462	32.3373	30.7016	30.6314
ENSBTAG00000011857	ENSBTAT00000015736	-0.248359	0.0552768	0.106878	5.20793	4.99938	5.61008	6.08266	6.64097	6.06513
ENSBTAG00000002227	ENSBTAT00000002883	-0.696034	2.45543e-13	2.54461e-12	17.8728	14.1434	15.9082	27.2317	26.3611	24.0469
ENSBTAG00000002227	ENSBTAT00000002883	-0.696034	2.45543e-13	2.54461e-12	17.8728	14.1434	15.9082	27.2317	26.3611	24.0469
ENSBTAG00000004494	ENSBTAT00000005893	0.113142	0.325564	0.448397	1.68155	2.01323	1.50546	1.58265	1.58689	1.63846
ENSBTAG00000010624	ENSBTAT00000067198	-0.503618	3.66934e-08	2.34144e-07	79.9756	82.9696	80.4989	124.116	103.605	117.425
ENSBTAG00000018358	ENSBTAT00000024422	0.266131	9.03146e-05	0.000355066	14.6676	14.0861	15.1825	12.1112	12.1764	12.2474
ENSBTAG00000043214	ENSBTAT00000060206	0.58729	1	1	1.62484	1.18581	1.33473	1.17293	1.20202	0.384174
ENSBTAG00000014659	ENSBTAT00000019519	-0.82464	8.30218e-06	3.88607e-05	1.34845	0.84601	1.06438	2.14593	1.97275	1.65304
ENSBTAG00000038498	ENSBTAT00000056411	-0.393735	0.0153884	0.0357641	2.57638	2.33357	2.60866	3.43229	3.11957	3.32601
ENSBTAG00000010701	ENSBTAT00000086995	-0.594364	5.94905e-14	6.49162e-13	79.298	78.2379	83.2545	122.715	114.938	125.894
ENSBTAG00000004374	ENSBTAT00000005733	-0.0889748	0.701549	0.791832	38.4042	40.2049	39.7246	42.2473	39.5454	44.0687
ENSBTAG00000014697	ENSBTAT00000071881	-0.0356356	0.787153	0.856637	19.7398	21.1173	20.1312	20.851	19.8108	21.8517
ENSBTAG00000031146	ENSBTAT00000044075	-0.31176	0.0409555	0.0827965	5.11985	4.42291	4.33851	5.86238	5.29786	6.06949
ENSBTAG00000020662	ENSBTAT00000027539	-0.347205	0.0062954	0.0163379	20.4647	21.2987	24.387	30.7723	28.6673	24.71
ENSBTAG00000016271	ENSBTAT00000021643	-0.411004	9.01385e-06	4.19978e-05	29.8759	31.7871	30.7655	40.476	39.1237	43.2944
ENSBTAG00000013859	ENSBTAT00000018408	0.23994	0.000100004	0.000391641	17.6627	16.3329	17.6504	14.7622	15.6228	13.3478
ENSBTAG00000003239	ENSBTAT00000066699	-0.140819	0.2846	0.404254	6.71684	6.64251	7.40716	7.94753	7.91594	7.03223
ENSBTAG00000017287	ENSBTAT00000022976	0.897197	9.16686e-40	3.25825e-38	32.3145	31.6718	33.0151	17.3702	18.1377	16.5749
ENSBTAG00000021633	ENSBTAT00000028828	-0.26053	0.0135814	0.0320264	19.6764	18.8605	20.3418	24.2212	25.5377	20.773
ENSBTAG00000020933	ENSBTAT00000081561	0.281109	8.87158e-05	0.000349232	9.3372	8.01097	9.33921	7.66099	7.58161	6.72001
ENSBTAG00000010644	ENSBTAT00000014069	-0.588042	1.44193e-05	6.51604e-05	4.55049	4.47687	4.87416	6.40374	6.80811	7.68498
ENSBTAG00000021196	ENSBTAT00000028244	-0.352102	0.0270702	0.0579517	4.55801	4.20535	4.52537	6.48553	5.86313	4.61332
ENSBTAG00000050973	ENSBTAT00000082382	-0.0244642	0.770854	0.843657	9.50703	10.203	8.48707	8.805	9.20956	10.6647
ENSBTAG00000004781	ENSBTAT00000038043	-0.353271	0.000472623	0.00162019	7.44334	6.49834	6.98816	8.8383	9.34274	8.55585
ENSBTAG00000000147	ENSBTAT00000029270	0.00422703	0.576372	0.688114	3.42044	3.21858	3.03473	3.08695	3.33484	3.22366
ENSBTAG00000030648	ENSBTAT00000069079	-0.178587	0.411346	0.535653	2.71202	2.26475	2.71658	2.59842	2.99543	3.1133
ENSBTAG00000002651	ENSBTAT00000075486	0.33075	0.0513865	0.100468	0.720394	0.53087	0.599083	0.47619	0.511126	0.483937
ENSBTAG00000002651	ENSBTAT00000075486	0.33075	0.0513865	0.100468	0.720394	0.53087	0.599083	0.47619	0.511126	0.483937
ENSBTAG00000020315	ENSBTAT00000027075	0.159442	0.0217824	0.0481431	6.59852	6.65107	7.12645	5.51006	6.66045	6.07362
ENSBTAG00000019373	ENSBTAT00000031418	0.00743189	0.473276	0.595872	6.70089	6.85021	6.21564	6.8646	6.74667	6.0539
ENSBTAG00000019373	ENSBTAT00000031418	0.00743189	0.473276	0.595872	6.70089	6.85021	6.21564	6.8646	6.74667	6.0539
ENSBTAG00000014106	ENSBTAT00000018760	-0.00787444	0.55117	0.666404	9.64836	8.48412	9.97405	9.83826	9.4978	8.9243
ENSBTAG00000011096	ENSBTAT00000014730	-0.195932	0.0894918	0.159487	34.5757	33.269	34.8982	41.3623	41.6428	34.6831
ENSBTAG00000002972	ENSBTAT00000056453	0.0404847	0.675797	0.772079	0.601756	0.579145	0.521986	0.622617	0.561757	0.471391
ENSBTAG00000013825	ENSBTAT00000018370	-0.594893	3.50939e-13	3.59395e-12	27.3788	25.3425	28.6357	40.4392	43.3269	39.1124
ENSBTAG00000013825	ENSBTAT00000018370	-0.594893	3.50939e-13	3.59395e-12	27.3788	25.3425	28.6357	40.4392	43.3269	39.1124
ENSBTAG00000022360	ENSBTAT00000084515	-0.406122	0.0472644	0.0935286	1.26803	0.960805	1.32492	1.65845	1.4042	1.64649
ENSBTAG00000019603	ENSBTAT00000026118	-0.87232	6.3619e-32	1.70718e-30	107.268	110.715	112.992	205.768	195.829	204.288
ENSBTAG00000005868	ENSBTAT00000007711	-0.262648	0.0562834	0.108617	14.6116	14.0729	12.2459	17.1127	15.2662	16.7245
ENSBTAG00000011761	ENSBTAT00000061164	0.212056	0.00159362	0.00483335	5.0465	5.30792	5.2716	4.65006	4.42087	4.41911
ENSBTAG00000051472	ENSBTAT00000085089	0.097271	0.434405	0.558449	9.78549	10.8111	9.73276	10.4984	9.88083	7.97268
ENSBTAG00000018207	ENSBTAT00000024233	0.0742092	0.0729519	0.134507	29.6397	32.6923	31.4231	30.3122	29.9923	28.75
ENSBTAG00000013126	ENSBTAT00000017445	-0.312437	0.0011835	0.00369836	18.8971	18.2133	20.3577	23.7897	22.5839	24.9904
ENSBTAG00000053346	ENSBTAT00000070334	-0.381265	0.0218943	0.0483816	5.41057	4.70012	5.50503	6.3491	8.72637	5.26374
ENSBTAG00000030369	ENSBTAT00000019606	0.511112	0.000209412	0.000774448	2.65089	2.76593	2.37547	1.57405	1.91074	1.98291
ENSBTAG00000014729	ENSBTAT00000019602	-0.279985	0.00718028	0.0182984	13.0529	11.6256	12.529	16.1077	15.2945	13.7745
ENSBTAG00000000275	ENSBTAT00000068193	0.0826015	0.100837	0.175864	5.7328	5.63516	5.52685	5.51632	5.39438	5.04398
ENSBTAG00000020472	ENSBTAT00000071767	0.0452102	0.56703	0.680234	8.08956	7.41322	4.95517	7.4046	7.85158	4.57061
ENSBTAG00000000049	ENSBTAT00000079346	-0.420289	0.0353662	0.0729777	1.80089	1.48829	1.39239	2.322	2.18577	1.75708
ENSBTAG00000054367	ENSBTAT00000068978	-0.304486	0.0231469	0.0507707	3.76205	4.49396	3.62298	4.72861	4.86692	5.07476
ENSBTAG00000011067	ENSBTAT00000014695	0.0602278	0.159866	0.256241	12.1946	12.6508	12.3409	11.1376	11.737	12.7912
ENSBTAG00000004820	ENSBTAT00000006328	-0.286503	0.0697446	0.129477	13.6551	13.7752	14.4813	15.6689	14.4337	21.0161
ENSBTAG00000009886	ENSBTAT00000013035	0.104446	0.0219254	0.0484326	191.132	178.86	201.542	178.286	180.564	172.768
ENSBTAG00000010157	ENSBTAT00000013405	-0.564088	5.68117e-09	3.96443e-08	44.4385	44.955	53.7385	72.4164	73.8208	65.3767
ENSBTAG00000010324	ENSBTAT00000065429	-0.474021	1.15819e-06	6.13728e-06	6.89783	7.40422	6.7693	9.85289	9.57834	9.83636
ENSBTAG00000017439	ENSBTAT00000081921	-0.32283	0.00049133	0.00167629	9.35866	8.5567	9.30739	11.8242	11.5647	10.6608
ENSBTAG00000021076	ENSBTAT00000068585	-0.273974	0.00785621	0.019838	4.85061	4.50785	4.99748	5.77509	5.95116	5.63199
ENSBTAG00000009507	ENSBTAT00000012510	0.564312	2.01706e-13	2.10647e-12	18.6965	16.3385	17.3961	11.656	12.7082	11.0937
ENSBTAG00000017652	ENSBTAT00000023480	-0.267063	0.00288002	0.00816834	28.3099	27.0889	28.0072	33.6065	33.1784	33.5822
ENSBTAG00000012267	ENSBTAT00000030417	-0.0340984	0.824002	0.883035	13.8854	10.9055	13.7354	13.38	14.4264	11.6414
ENSBTAG00000012267	ENSBTAT00000030417	-0.0340984	0.824002	0.883035	13.8854	10.9055	13.7354	13.38	14.4264	11.6414
ENSBTAG00000050467	ENSBTAT00000069163	0.172684	0.0617845	0.117499	3.16492	3.03415	3.2067	2.96463	3.02075	2.35932
ENSBTAG00000004427	ENSBTAT00000005804	0.348644	4.71133e-07	2.638e-06	17.9722	17.8772	20.3704	14.4255	15.7518	13.9733
ENSBTAG00000043949	ENSBTAT00000061166	0.129747	0.059165	0.113297	25.2038	29.8872	25.4848	24.1134	22.8253	26.7069
ENSBTAG00000014609	ENSBTAT00000061600	0.307849	7.1768e-07	3.93156e-06	51.6001	53.2264	51.4901	43.014	44.6688	38.5968
ENSBTAG00000014609	ENSBTAT00000061600	0.307849	7.1768e-07	3.93156e-06	51.6001	53.2264	51.4901	43.014	44.6688	38.5968
ENSBTAG00000014609	ENSBTAT00000061600	0.307849	7.1768e-07	3.93156e-06	51.6001	53.2264	51.4901	43.014	44.6688	38.5968
ENSBTAG00000014609	ENSBTAT00000061600	0.307849	7.1768e-07	3.93156e-06	51.6001	53.2264	51.4901	43.014	44.6688	38.5968
ENSBTAG00000008382	ENSBTAT00000011034	-0.0650312	0.96869	0.982019	1.91322	1.7932	1.93254	2.11156	1.91211	1.87529
ENSBTAG00000026966	ENSBTAT00000038601	1.75499	1	1	0.332385	0.304427	0.264627	0.068007	0.139707	0.05936
ENSBTAG00000018745	ENSBTAT00000024961	0.114679	0.257809	0.374692	2.55598	2.5614	3.00782	2.83204	2.83342	1.83887
ENSBTAG00000018745	ENSBTAT00000024961	0.114679	0.257809	0.374692	2.55598	2.5614	3.00782	2.83204	2.83342	1.83887
ENSBTAG00000051348	ENSBTAT00000063396	0.185315	0.224201	0.335349	2.22888	2.35528	2.76218	2.53413	2.46044	1.46622
ENSBTAG00000017549	ENSBTAT00000065938	-0.0337275	0.890909	0.929285	2.40585	2.62149	2.57983	2.94085	2.6939	2.15235
ENSBTAG00000000687	ENSBTAT00000000919	-0.471281	0.00037283	0.00130835	4.69148	4.99817	4.38914	7.19094	6.73467	5.59239
ENSBTAG00000009552	ENSBTAT00000012570	0.148266	0.0107624	0.0262285	24.3798	22.0017	25.661	22.113	23.0569	19.8365
ENSBTAG00000001745	ENSBTAT00000002279	0.0364748	0.180323	0.282366	520.003	506.475	536.967	535.064	512.284	477.065
ENSBTAG00000020330	ENSBTAT00000066529	0.126461	0.0214428	0.0474614	68.4345	66.7246	74.7423	67.6584	67.0314	57.5958
ENSBTAG00000000421	ENSBTAT00000081019	0.387209	1.52126e-07	9.03835e-07	20.4249	19.1503	21.4247	16.4639	16.5934	13.5836
ENSBTAG00000000421	ENSBTAT00000081019	0.387209	1.52126e-07	9.03835e-07	20.4249	19.1503	21.4247	16.4639	16.5934	13.5836
ENSBTAG00000004484	ENSBTAT00000067615	-0.12612	0.554514	0.66905	5.62095	5.02325	5.488	6.75239	5.95688	4.89668
ENSBTAG00000001553	ENSBTAT00000013110	-0.849336	2.10014e-24	4.08469e-23	271.604	308.332	281.309	547.364	520.002	484.313
ENSBTAG00000012149	ENSBTAT00000016117	0.12001	0.163359	0.26091	5.87403	6.28686	5.41238	5.24698	6.06784	4.85577
ENSBTAG00000006879	ENSBTAT00000009028	-0.0759063	0.922129	0.950117	2.18754	2.21509	2.61112	2.44602	2.33093	2.61569
ENSBTAG00000052501	ENSBTAT00000086710	0	1	1	NA	NA	NA	NA	NA	NA
ENSBTAG00000003021	ENSBTAT00000003929	-0.245393	0.0113125	0.0273553	10.9554	11.7365	11.1272	13.5222	13.719	12.8484
ENSBTAG00000021658	ENSBTAT00000028862	0.58306	3.56765e-10	2.83453e-09	8.58327	8.23102	8.74389	5.32258	5.66838	6.07031
ENSBTAG00000018131	ENSBTAT00000024135	0.0082807	0.456885	0.580102	12.7154	12.1374	13.7191	13.527	13.3494	11.4746
ENSBTAG00000005246	ENSBTAT00000006902	-0.0521553	0.956788	0.973607	16.0004	16.0315	17.6584	17.0989	17.9409	16.4796
ENSBTAG00000017164	ENSBTAT00000072760	0.108402	0.0311234	0.0652528	15.0867	13.7583	14.6555	13.3789	14.3682	12.6046
ENSBTAG00000000808	ENSBTAT00000001069	-0.186567	0.14412	0.235727	74.1128	80.7738	72.1127	85.2494	80.5973	92.4905
ENSBTAG00000004660	ENSBTAT00000006116	-0.354193	9.49056e-05	0.000372513	14.1234	13.5837	14.1793	18.801	17.4227	17.3185
ENSBTAG00000015825	ENSBTAT00000021022	-0.539642	0.0631085	0.119492	0.550946	0.45278	0.456005	0.510526	0.856961	0.754395
ENSBTAG00000015825	ENSBTAT00000021022	-0.539642	0.0631085	0.119492	0.550946	0.45278	0.456005	0.510526	0.856961	0.754395
ENSBTAG00000032331	ENSBTAT00000045866	-0.0421903	0.892378	0.930418	6.34429	7.44628	7.15951	7.4889	7.13509	6.9478
ENSBTAG00000011087	ENSBTAT00000014719	0.0442822	0.225711	0.337234	5.89562	6.35892	6.52259	6.45455	6.07905	5.67595
ENSBTAG00000032148	ENSBTAT00000045612	0.28618	0.0174549	0.0397718	4.74591	3.47294	4.84969	3.85013	3.80983	3.05717
ENSBTAG00000003748	ENSBTAT00000057053	-0.15377	0.215915	0.325965	17.8806	17.408	18.8681	21.1912	20.7095	18.3472
ENSBTAG00000031950	ENSBTAT00000022990	0.230503	0.0019025	0.0056614	9.74858	9.60483	9.77283	9.0884	7.8906	7.84639
ENSBTAG00000019155	ENSBTAT00000025495	0.549567	1.58597e-13	1.66918e-12	10.2699	10.0003	10.3107	6.78441	7.15179	6.95745
ENSBTAG00000002256	ENSBTAT00000002913	0.255218	0.0029533	0.0083489	13.1425	13.2368	12.8748	11.4343	11.8866	9.5685
ENSBTAG00000010422	ENSBTAT00000075725	0.632621	1.3881e-16	1.78558e-15	34.2039	29.7463	34.1018	20.554	23.2416	19.4484
ENSBTAG00000051975	ENSBTAT00000083053	-0.0176473	1	1	0.307469	0.134208	0.269444	0.235633	0.334267	0.149973
ENSBTAG00000009939	ENSBTAT00000013112	-0.10349	0.538288	0.655129	41.9374	36.8031	41.4593	44.3861	45.1752	39.5777
ENSBTAG00000020806	ENSBTAT00000063430	-0.225164	0.17766	0.279167	2.1991	2.00213	2.55941	2.6225	2.72837	2.55171
ENSBTAG00000039435	ENSBTAT00000053178	0.230825	0.00490533	0.0130737	7.76607	7.96025	7.40518	5.90511	7.08842	6.71791
ENSBTAG00000051013	ENSBTAT00000071902	-0.20423	0.054653	0.105824	9.36355	9.33385	9.18556	10.8793	10.9471	10.2967
ENSBTAG00000011892	ENSBTAT00000015786	-0.269671	0.00684174	0.0175683	7.75931	7.51845	7.1441	8.96899	9.17045	8.89085
ENSBTAG00000004753	ENSBTAT00000006237	-0.0143007	0.750338	0.827717	8.13382	6.26009	7.67038	6.62512	8.12067	7.5383
ENSBTAG00000011068	ENSBTAT00000086358	-0.0829618	0.705815	0.79495	13.4573	13.2192	14.0544	14.7287	14.7914	13.6217
ENSBTAG00000011068	ENSBTAT00000086358	-0.0829618	0.705815	0.79495	13.4573	13.2192	14.0544	14.7287	14.7914	13.6217
ENSBTAG00000053892	ENSBTAT00000084117	0.485613	1	1	0.03841	0	0.060874	0.070908	0	0
ENSBTAG00000021287	ENSBTAT00000028361	-0.293582	0.0402517	0.0816698	3.91519	4.47794	4.09451	5.01169	5.41671	4.87745
ENSBTAG00000016910	ENSBTAT00000022493	0.0811157	0.250369	0.366574	3.70558	3.55576	3.36678	3.47543	3.54492	3.02668
ENSBTAG00000016904	ENSBTAT00000022483	0.464541	6.74114e-06	3.20475e-05	5.61997	5.12742	4.91714	3.61223	3.76034	3.97955
ENSBTAG00000003942	ENSBTAT00000005146	-0.204871	0.0369529	0.0757887	23.5288	21.9827	22.2762	26.3488	25.7441	26.038
ENSBTAG00000017830	ENSBTAT00000023705	-0.0436766	0.88569	0.925594	33.6902	35.7315	30.9191	36.4265	31.7581	35.2405
ENSBTAG00000004378	ENSBTAT00000005745	-0.0722106	0.956663	0.973607	3.25628	3.69678	2.55617	3.55111	3.83637	2.60982
ENSBTAG00000009543	ENSBTAT00000044160	-0.367094	4.945e-06	2.39012e-05	48.6601	49.2146	47.4899	62.1166	61.8629	63.5046
ENSBTAG00000006160	ENSBTAT00000008101	-0.324395	0.00802733	0.0202407	6.09277	6.78377	6.83757	8.00048	8.40533	8.27898
ENSBTAG00000052178	ENSBTAT00000077810	-1.68129	1	1	0.029057	0.033346	0.054304	0.131565	0.126009	0.116722
ENSBTAG00000001510	ENSBTAT00000077282	-0.151517	0.32184	0.444528	11.6636	10.1417	12.4477	13.4018	13.4915	11.1529
ENSBTAG00000021660	ENSBTAT00000028864	0.179215	0.00460559	0.0123643	31.9642	32.4066	33.2197	29.1335	31.1076	25.9492
ENSBTAG00000006040	ENSBTAT00000007936	-0.0156523	0.647391	0.74889	12.6402	11.8336	13.7126	13.3067	14.0695	11.2268
ENSBTAG00000019409	ENSBTAT00000083649	0.590837	1.44515e-17	1.98052e-16	19.715	17.2306	19.7651	12.4921	12.3424	12.8191
ENSBTAG00000000925	ENSBTAT00000001224	0.535894	8.29125e-05	0.000328194	2.69466	2.81242	3.04664	1.70737	2.22695	1.96545
ENSBTAG00000021875	ENSBTAT00000083157	0.275409	0.000671408	0.00221904	8.57844	7.76973	9.21283	7.26537	7.67162	6.18192
ENSBTAG00000021875	ENSBTAT00000083157	0.275409	0.000671408	0.00221904	8.57844	7.76973	9.21283	7.26537	7.67162	6.18192
ENSBTAG00000030784	ENSBTAT00000043505	0.395024	2.23473e-08	1.46523e-07	15.7662	16.4256	16.0295	12.9412	11.3989	12.331
ENSBTAG00000011913	ENSBTAT00000015804	-0.467705	5.92513e-10	4.58471e-09	105.526	102.444	105.775	146.726	146.169	140.985
ENSBTAG00000010144	ENSBTAT00000013386	0.281676	0.105847	0.18281	1.82996	1.54744	2.14747	1.41735	1.83911	1.28849
ENSBTAG00000011070	ENSBTAT00000014699	0.0385382	0.182662	0.284859	36.4652	33.1018	35.8933	34.0459	35.1298	33.5048
ENSBTAG00000050644	ENSBTAT00000068830	1.21879	1.49565e-32	4.08563e-31	31.1751	24.1952	32.2593	12.0051	13.7866	11.8577
ENSBTAG00000021953	ENSBTAT00000029269	0.458997	7.93003e-13	7.96016e-12	13.1328	13.241	13.0226	9.61146	9.67339	9.37578
ENSBTAG00000020125	ENSBTAT00000070015	0.118942	0.0321056	0.0670231	22.1085	21.8024	18.7493	19.6336	18.734	19.3339
ENSBTAG00000020125	ENSBTAT00000070015	0.118942	0.0321056	0.0670231	22.1085	21.8024	18.7493	19.6336	18.734	19.3339
ENSBTAG00000048740	ENSBTAT00000069263	-1.71681	1	1	0.150679	0.046949	0.089425	0.308538	0.226851	0.408182
ENSBTAG00000015044	ENSBTAT00000071948	-0.675395	4.15459e-06	2.03396e-05	3.35241	2.57552	2.20391	4.39573	4.43323	4.15787
ENSBTAG00000030632	ENSBTAT00000043297	-0.121832	0.542323	0.658919	8.79844	8.15958	9.73838	10.2456	10.685	8.11809
ENSBTAG00000005453	ENSBTAT00000067481	0.222468	0.0624019	0.118395	1.62642	1.68274	1.91583	1.57816	1.69952	1.20065
ENSBTAG00000006734	ENSBTAT00000086409	-0.818513	4.20208e-18	5.93959e-17	7.32799	8.10756	8.766	14.4029	14.4494	13.8293
ENSBTAG00000004999	ENSBTAT00000052937	0.034244	0.421061	0.544977	3.64234	4.82689	4.82566	4.46561	4.63208	3.88535
ENSBTAG00000004999	ENSBTAT00000052937	0.034244	0.421061	0.544977	3.64234	4.82689	4.82566	4.46561	4.63208	3.88535
ENSBTAG00000004999	ENSBTAT00000052937	0.034244	0.421061	0.544977	3.64234	4.82689	4.82566	4.46561	4.63208	3.88535
ENSBTAG00000042468	ENSBTAT00000059460	0	1	1	NA	NA	NA	NA	NA	NA
ENSBTAG00000006372	ENSBTAT00000008359	-0.203991	0.252731	0.369169	4.39294	4.20751	3.97816	5.05515	4.47144	4.96246
ENSBTAG00000021980	ENSBTAT00000029308	0.477834	2.76129e-12	2.68745e-11	31.6142	32.605	29.9922	23.4519	22.115	22.0821
ENSBTAG00000053951	ENSBTAT00000070012	-0.164089	0.620902	0.726718	1.16295	1.66003	1.46112	1.40938	1.84772	1.54306
ENSBTAG00000030503	ENSBTAT00000043046	-0.373088	0.000840566	0.00271392	40.7781	45.2916	39.1227	52.918	51.1053	58.1161
ENSBTAG00000003221	ENSBTAT00000004182	-0.247649	0.0122436	0.0292848	8.52141	8.79898	8.71247	10.2819	10.7193	9.90684
ENSBTAG00000019608	ENSBTAT00000076989	-0.18558	0.0997879	0.17431	16.501	16.7752	16.9045	18.7345	19.3759	18.9588
ENSBTAG00000002362	ENSBTAT00000003055	-1.02249	1.58969e-08	1.05655e-07	1.25501	1.37505	1.36195	3.14016	3.00473	1.96458
ENSBTAG00000018254	ENSBTAT00000024297	-0.0292906	0.801719	0.86706	12.132	9.91644	10.1183	11.0017	12.3949	9.42986
ENSBTAG00000011957	ENSBTAT00000043028	0.153463	0.0487351	0.0959576	8.66343	7.41541	8.13879	7.42991	8.21538	6.12853
ENSBTAG00000014605	ENSBTAT00000083145	-0.356877	4.89145e-05	0.00020266	9.75588	9.69177	9.08827	12.2659	11.9657	12.3129
ENSBTAG00000052681	ENSBTAT00000067953	-0.334036	0.170388	0.269868	8.14262	7.94204	10.4349	11.7468	10.1789	11.5031
ENSBTAG00000004556	ENSBTAT00000042889	-0.00859991	0.49396	0.615791	65.3031	68.3465	62.9795	65.775	67.7766	64.2531
ENSBTAG00000003598	ENSBTAT00000037738	-0.101313	0.560357	0.674365	34.5154	37.6456	33.4044	36.4821	38.4077	38.3554
ENSBTAG00000016650	ENSBTAT00000022146	0.279703	0.070072	0.129995	5.40503	5.53744	5.0295	5.27588	4.81003	3.07116
ENSBTAG00000049163	ENSBTAT00000067041	-0.952026	2.18181e-25	4.45749e-24	11.8172	10.2061	11.6484	20.1775	21.1427	23.8206
ENSBTAG00000019788	ENSBTAT00000036296	-0.125043	0.496674	0.618033	11.2886	12.0998	12.8436	12.3135	12.4149	14.784
ENSBTAG00000015878	ENSBTAT00000021104	-0.888934	7.9457e-17	1.03303e-15	10.2224	9.65935	8.99095	19.1676	18.2954	16.0037
ENSBTAG00000015878	ENSBTAT00000021104	-0.888934	7.9457e-17	1.03303e-15	10.2224	9.65935	8.99095	19.1676	18.2954	16.0037
ENSBTAG00000020472	ENSBTAT00000071767	0.0452102	0.56703	0.680234	8.08956	7.41322	4.95517	7.4046	7.85158	4.57061
ENSBTAG00000009887	ENSBTAT00000083709	-0.172983	0.113504	0.193606	79.8222	71.2277	77.9555	86.5069	91.2619	80.4088
ENSBTAG00000006200	ENSBTAT00000085075	-0.215177	0.0489148	0.0962616	11.3736	11.265	11.727	13.706	13.7149	12.4724
ENSBTAG00000006200	ENSBTAT00000085075	-0.215177	0.0489148	0.0962616	11.3736	11.265	11.727	13.706	13.7149	12.4724
ENSBTAG00000006202	ENSBTAT00000008146	-0.097856	0.542069	0.658676	101.782	103.815	101.155	111.46	111.693	105.128
ENSBTAG00000006202	ENSBTAT00000008146	-0.097856	0.542069	0.658676	101.782	103.815	101.155	111.46	111.693	105.128
ENSBTAG00000006423	ENSBTAT00000008423	-0.294468	0.0167425	0.0384293	16.3163	13.8861	16.4083	19.392	19.8813	17.8916
ENSBTAG00000006104	ENSBTAT00000008022	-0.239662	0.027308	0.0583952	36.5944	42.0574	40.5548	47.2633	44.361	49.1248
ENSBTAG00000009956	ENSBTAT00000013133	-0.440117	0.00111558	0.00351319	6.85265	7.2229	6.36214	9.48829	9.19025	9.04958
ENSBTAG00000009506	ENSBTAT00000012508	0.265544	1.73925e-05	7.73879e-05	69.8905	73.3106	67.2455	56.6436	57.2639	61.1597
ENSBTAG00000044478	ENSBTAT00000061911	-0.896373	1	1	0.027595	0.312329	0.033162	0.192916	0.084508	0.417031
ENSBTAG00000016507	ENSBTAT00000021944	inf	1	1	0	0.0232918	0	0	0	0
ENSBTAG00000003574	ENSBTAT00000064701	-0.596541	0.000351283	0.00123738	4.28013	3.22708	4.04493	5.46748	5.37792	6.62243
ENSBTAG00000014966	ENSBTAT00000067451	0.212809	0.000430931	0.0014937	36.689	37.7327	35.7867	29.8286	31.2118	34.0534
ENSBTAG00000021746	ENSBTAT00000028988	0.235788	4.80257e-05	0.000199181	929.573	942.859	953.14	854.843	808.576	736.116
ENSBTAG00000024888	ENSBTAT00000014479	0.617351	5.95815e-20	9.30942e-19	41.7922	38.8419	42.082	26.1041	28.8219	25.0686
ENSBTAG00000046440	ENSBTAT00000065591	-0.563452	0.0186615	0.0421574	1.8453	1.4232	1.37266	2.69452	2.23677	1.92743
ENSBTAG00000017808	ENSBTAT00000023672	0.223637	7.10617e-05	0.000284621	39.1814	38.9834	41.0518	35.664	34.1918	32.2418
ENSBTAG00000026936	ENSBTAT00000049376	-0.995621	3.85577e-11	3.38661e-10	1.04328	0.785431	1.01183	1.8126	2.11409	1.73717
ENSBTAG00000026936	ENSBTAT00000049376	-0.995621	3.85577e-11	3.38661e-10	1.04328	0.785431	1.01183	1.8126	2.11409	1.73717
ENSBTAG00000010564	ENSBTAT00000067475	-0.125503	0.451087	0.574059	12.0923	12.0856	11.7211	13.1772	14.559	11.4256
ENSBTAG00000015230	ENSBTAT00000020263	-0.281763	0.00239361	0.0069311	14.9823	14.3795	15.4443	17.651	19.3587	17.4601
ENSBTAG00000033648	ENSBTAT00000047799	0.244269	0.00889981	0.0221602	10.9916	12.1861	12.2722	11.3818	8.80057	9.74591
ENSBTAG00000040088	ENSBTAT00000012761	-0.454423	0.0398923	0.0810378	1.06864	1.29015	1.26623	1.3757	1.885	1.70645
ENSBTAG00000019761	ENSBTAT00000026334	0.0101316	0.399553	0.524645	15.2759	16.3347	14.8522	16.3337	14.8529	14.9511
ENSBTAG00000016005	ENSBTAT00000021305	-0.219041	0.0204843	0.0455556	28.2492	29.8074	29.2065	34.1132	34.0032	33.4542
ENSBTAG00000046333	ENSBTAT00000064829	1.94717	2.89485e-47	1.29374e-45	4.29297	5.05284	4.21725	0.948339	1.23968	1.32921
ENSBTAG00000009522	ENSBTAT00000012530	-0.128047	0.42794	0.551597	55.9905	51.9223	58.7865	65.6367	64.7901	51.7444
ENSBTAG00000011187	ENSBTAT00000071336	-0.496797	6.00722e-09	4.18474e-08	9.36677	8.92061	9.69896	13.3498	14.066	12.075
ENSBTAG00000010120	ENSBTAT00000013357	-0.240677	0.0256816	0.0555392	5.90283	5.8695	5.9748	7.23406	7.14831	6.5867
ENSBTAG00000020541	ENSBTAT00000027369	0.209337	0.000439621	0.00151819	39.5512	37.4522	41.4487	36.2235	33.1338	33.096
ENSBTAG00000005754	ENSBTAT00000007563	-0.368157	6.55643e-05	0.000264257	20.3051	17.3281	19.283	23.805	26.1309	23.526
ENSBTAG00000019441	ENSBTAT00000025895	-0.12779	0.344204	0.46813	48.5216	48.1197	50.3954	52.8463	55.6709	52.1379
ENSBTAG00000003897	ENSBTAT00000039673	-0.363496	0.00157542	0.00478411	41.4945	41.5921	41.7382	49.1582	49.512	61.9219
ENSBTAG00000003602	ENSBTAT00000004696	-0.0401165	0.825537	0.884239	35.3215	35.1536	34.5876	36.5785	37.8449	33.6017
ENSBTAG00000019353	ENSBTAT00000047170	0.267008	2.93375e-05	0.000125839	17.2112	16.3324	17.8411	14.6111	14.9335	13.1583
ENSBTAG00000000061	ENSBTAT00000075153	-0.193391	0.576049	0.687795	10.931	23.4857	9.61982	16.626	17.1201	16.6074
ENSBTAG00000005773	ENSBTAT00000007589	-0.0129531	0.583516	0.693911	12.5894	12.7757	13.4859	13.6563	13.0308	12.5143
ENSBTAG00000033160	ENSBTAT00000086949	0.016343	0.300294	0.420842	37.4101	37.2517	37.7761	37.9892	35.9531	37.2291
ENSBTAG00000000175	ENSBTAT00000000200	0.325481	0.000104368	0.000407046	7.4314	7.26386	8.95078	5.80204	7.00267	6.06558
ENSBTAG00000010677	ENSBTAT00000039655	1.82441	6.39585e-55	3.44017e-53	2.63192	2.97482	2.62662	0.771986	0.79874	0.754013
ENSBTAG00000000473	ENSBTAT00000000601	0.051301	0.219586	0.330071	4.52753	4.34156	4.95363	4.59209	4.46029	4.28747
ENSBTAG00000010611	ENSBTAT00000014028	-0.214018	0.0386773	0.0787803	56.4911	55.1582	55.2084	68.7547	66.2791	58.5067
ENSBTAG00000020647	ENSBTAT00000027515	0.696637	3.87253e-17	5.18441e-16	15.164	14.0848	15.1517	8.71171	9.85143	8.83235
ENSBTAG00000020647	ENSBTAT00000027515	0.696637	3.87253e-17	5.18441e-16	15.164	14.0848	15.1517	8.71171	9.85143	8.83235
ENSBTAG00000007173	ENSBTAT00000067659	0.265453	3.26857e-06	1.63106e-05	44.8233	43.6944	44.3764	37.0742	38.7824	34.7029
ENSBTAG00000007173	ENSBTAT00000067659	0.265453	3.26857e-06	1.63106e-05	44.8233	43.6944	44.3764	37.0742	38.7824	34.7029
ENSBTAG00000014913	ENSBTAT00000019855	-0.0462514	0.945475	0.965896	3.48838	5.07512	3.52049	4.32952	4.40188	3.74626
ENSBTAG00000032637	ENSBTAT00000046297	0.0986342	0.0480626	0.0948513	14.8218	14.4753	15.3393	14.2813	14.7942	12.6112
ENSBTAG00000011789	ENSBTAT00000039615	-0.0353609	0.79093	0.859132	6.59911	6.64571	6.45582	6.79056	7.38706	6.01186
ENSBTAG00000007190	ENSBTAT00000009462	0.49164	3.07882e-08	1.98344e-07	4.77191	4.43803	4.84763	3.43002	3.48218	3.08576
ENSBTAG00000017028	ENSBTAT00000022642	0.0209801	0.329475	0.452503	65.5172	61.7166	64.9322	66.4975	67.3141	55.58
ENSBTAG00000021372	ENSBTAT00000068737	-0.217651	0.0320752	0.0669826	39.0193	36.8214	39.3592	46.5122	47.1165	40.3302
ENSBTAG00000021372	ENSBTAT00000075617	-0.217651	0.0320752	0.0669826	39.0193	36.8214	39.3592	46.5122	47.1165	40.3302
ENSBTAG00000010716	ENSBTAT00000080436	0.149198	0.0103982	0.0254021	4.96797	4.77238	4.61712	3.97051	4.60971	4.36665
ENSBTAG00000001126	ENSBTAT00000001500	-0.369629	0.000179798	0.000675618	6.21349	5.54679	6.18787	8.01439	8.27082	6.90416
ENSBTAG00000032034	ENSBTAT00000045443	0	1	1	NA	NA	NA	NA	NA	NA
ENSBTAG00000014805	ENSBTAT00000019702	-0.272874	0.0026329	0.00753957	28.1594	26.7136	28.3122	32.9999	34.9157	32.5897
ENSBTAG00000022450	ENSBTAT00000030398	-0.236834	0.145466	0.237417	2.90483	2.35336	2.81197	3.04697	3.20207	3.26087
ENSBTAG00000018155	ENSBTAT00000067534	-0.0221379	0.824302	0.88315	12.0113	10.5768	12.6185	11.3169	10.9768	13.4573
ENSBTAG00000018155	ENSBTAT00000067534	-0.0221379	0.824302	0.88315	12.0113	10.5768	12.6185	11.3169	10.9768	13.4573
ENSBTAG00000017592	ENSBTAT00000023396	-0.616258	5.47359e-10	4.26519e-09	11.6646	9.83262	11.4701	17.179	17.7672	15.5892
ENSBTAG00000017592	ENSBTAT00000023396	-0.616258	5.47359e-10	4.26519e-09	11.6646	9.83262	11.4701	17.179	17.7672	15.5892
ENSBTAG00000014947	ENSBTAT00000055276	-0.479153	1.05848e-08	7.20834e-08	8.49446	8.37609	9.03498	12.443	12.2669	11.4005
ENSBTAG00000018488	ENSBTAT00000070038	0.709798	6.06008e-22	1.05691e-20	7.90279	8.33972	8.36452	4.83686	5.18633	5.02168
ENSBTAG00000005712	ENSBTAT00000007503	0.0592477	0.216591	0.32666	8.77458	8.6311	8.90085	8.61111	9.04211	7.59485
ENSBTAG00000055011	ENSBTAT00000081648	0.0330613	0.692487	0.785103	0.852386	1.1842	1.06616	1.09664	0.876654	1.05915
ENSBTAG00000019427	ENSBTAT00000025878	0.0371109	0.261343	0.378839	9.70611	8.4087	9.10446	9.49842	8.88614	8.14347
ENSBTAG00000005493	ENSBTAT00000073510	0.108057	0.0288701	0.0611934	11.0547	10.495	10.2487	9.59836	10.4323	9.47297
ENSBTAG00000001504	ENSBTAT00000044320	-0.0124727	0.565787	0.679347	15.7222	14.1015	15.786	15.0443	15.8026	15.1587
ENSBTAG00000024787	ENSBTAT00000034513	0.0176211	0.508624	0.629008	7.4581	6.41446	7.48095	7.16635	7.87884	6.0491
ENSBTAG00000024787	ENSBTAT00000034513	0.0176211	0.508624	0.629008	7.4581	6.41446	7.48095	7.16635	7.87884	6.0491
ENSBTAG00000012658	ENSBTAT00000067978	-0.250311	0.0556025	0.107491	20.7911	23.9058	22.2081	27.7392	25.6536	26.1883
ENSBTAG00000010350	ENSBTAT00000049054	1.41451	1.80421e-72	1.3881e-70	24.5713	27.0085	26.9869	9.86083	10.531	9.08147
ENSBTAG00000002574	ENSBTAT00000003330	1.96399	1.02585e-70	7.55768e-69	140.241	133.161	161.986	33.9654	45.1596	32.4735
ENSBTAG00000014080	ENSBTAT00000018721	-0.00281564	0.5966	0.7052	9.75595	8.13715	9.35614	9.56092	9.66033	8.08121
ENSBTAG00000009632	ENSBTAT00000084701	-0.108192	0.583651	0.693941	14.9228	14.8195	16.3453	17.8082	17.449	14.4195
ENSBTAG00000017375	ENSBTAT00000023103	0.527634	4.39414e-05	0.000183683	6.17368	5.34899	6.19386	4.53611	4.62139	3.13231
ENSBTAG00000000748	ENSBTAT00000000992	-0.105259	0.627054	0.732362	25.8611	25.5287	27.7787	29.5232	30.0069	25.6303
ENSBTAG00000011611	ENSBTAT00000035535	-0.223746	0.0891752	0.159086	121.743	113.416	125.916	151.612	155.249	114.788
ENSBTAG00000012972	ENSBTAT00000017246	-0.145118	0.577587	0.689091	1.02957	0.842513	0.948009	1.02684	1.08211	1.00956
ENSBTAG00000016805	ENSBTAT00000022353	0.394424	0.00112572	0.00353873	2.66587	3.16839	2.83771	2.19212	2.38783	2.01763
ENSBTAG00000016805	ENSBTAT00000022353	0.394424	0.00112572	0.00353873	2.66587	3.16839	2.83771	2.19212	2.38783	2.01763
ENSBTAG00000004230	ENSBTAT00000076410	-0.137691	0.363114	0.487521	39.8773	37.8545	42.9072	47.3522	47.307	38.061
ENSBTAG00000013927	ENSBTAT00000018510	-0.520261	2.1652e-05	9.47111e-05	3.07694	2.89668	3.20566	4.40085	4.937	3.82721
ENSBTAG00000017682	ENSBTAT00000023517	-0.154462	0.188559	0.292288	7.43671	7.92016	7.39558	8.59666	8.43806	8.28891
ENSBTAG00000017682	ENSBTAT00000023517	-0.154462	0.188559	0.292288	7.43671	7.92016	7.39558	8.59666	8.43806	8.28891
ENSBTAG00000020270	ENSBTAT00000027016	0.148819	0.0159892	0.0369443	7.2703	6.84996	7.40066	6.16805	6.67949	6.56408
ENSBTAG00000016004	ENSBTAT00000084428	-0.157956	0.209921	0.318139	8.63318	8.39842	8.57559	9.77274	9.76741	9.02992
ENSBTAG00000002081	ENSBTAT00000002690	0.493705	3.89967e-07	2.21205e-06	3.42181	2.86307	3.18962	2.3058	2.32706	2.09591
ENSBTAG00000015265	ENSBTAT00000020304	-0.0886548	0.801391	0.86706	4.5076	4.3061	4.43085	4.79187	4.7522	4.53989
ENSBTAG00000046561	ENSBTAT00000075421	-0.244164	0.106072	0.183083	0.925029	0.835138	0.902183	1.06136	1.12545	0.966499
ENSBTAG00000046561	ENSBTAT00000075421	-0.244164	0.106072	0.183083	0.925029	0.835138	0.902183	1.06136	1.12545	0.966499
ENSBTAG00000004653	ENSBTAT00000069292	0.00865034	0.375996	0.501218	19.5867	21.1041	19.5612	19.446	20.9992	19.4466
ENSBTAG00000004329	ENSBTAT00000005668	-0.850868	1.16947e-13	1.24266e-12	4.75918	4.5652	5.92904	9.4836	9.16552	8.86174
ENSBTAG00000014042	ENSBTAT00000073994	3.22806	1	1	0	0	0.0552497	0	0.0058964	0
ENSBTAG00000014515	ENSBTAT00000019296	-0.108278	0.526067	0.644369	16.4311	15.3418	16.8491	18.5364	18.3534	15.5219
ENSBTAG00000027569	ENSBTAT00000039647	0.685193	1.25243e-26	2.6663e-25	31.8977	32.3361	33.0387	19.9878	21.1397	19.3686
ENSBTAG00000002550	ENSBTAT00000003304	-0.652612	1	1	2.3686	1.24877	1.79405	1.79021	2.14022	4.57639
ENSBTAG00000000137	ENSBTAT00000000158	0.40096	2.16548e-10	1.76432e-09	16.0465	15.887	16.8807	12.2469	13.1697	11.553
ENSBTAG00000000137	ENSBTAT00000000158	0.40096	2.16548e-10	1.76432e-09	16.0465	15.887	16.8807	12.2469	13.1697	11.553
ENSBTAG00000014601	ENSBTAT00000053713	0.371107	1.08179e-07	6.51322e-07	26.9336	24.2332	26.4962	20.5123	21.5959	17.9401
ENSBTAG00000003443	ENSBTAT00000004472	0.205595	0.00341947	0.00950538	10.1816	10.3962	11.7313	9.52784	10.2556	8.2344
ENSBTAG00000020658	ENSBTAT00000051993	-0.567251	0.0116418	0.0280289	0.75648	0.561021	0.493502	0.899273	0.892365	0.891721
ENSBTAG00000020583	ENSBTAT00000079184	-0.0938375	0.739636	0.820498	2.90365	2.68109	2.92615	3.1373	3.26158	2.68398
ENSBTAG00000001323	ENSBTAT00000001748	-0.182342	0.209733	0.317934	6.65998	6.2142	6.71362	7.60041	8.2067	6.41964
ENSBTAG00000014041	ENSBTAT00000018663	0.0502505	0.154033	0.248692	28.2901	25.054	27.7199	27.339	25.7557	25.1944
ENSBTAG00000007639	ENSBTAT00000007240	-0.0878851	0.743024	0.822759	11.9975	10.0828	12.017	12.3061	13.2846	10.6484
ENSBTAG00000049571	ENSBTAT00000075104	-0.255995	0.0237522	0.0518555	6.43041	6.12741	6.67662	7.61427	8.62646	6.72825
ENSBTAG00000001126	ENSBTAT00000001500	-0.369629	0.000179798	0.000675618	6.21349	5.54679	6.18787	8.01439	8.27082	6.90416
ENSBTAG00000032034	ENSBTAT00000045443	0	1	1	NA	NA	NA	NA	NA	NA
ENSBTAG00000014324	ENSBTAT00000019050	-0.0923028	0.631797	0.736138	51.9126	51.5924	53.4326	57.7557	59.0089	50.5419
ENSBTAG00000014804	ENSBTAT00000019699	-0.263872	0.00256028	0.00735414	70.808	74.1049	74.7482	90.2547	89.1504	84.3411
ENSBTAG00000032588	ENSBTAT00000083042	-0.186371	0.18257	0.284784	27.6854	21.9616	24.3632	26.1656	26.3508	31.6996
ENSBTAG00000032588	ENSBTAT00000083042	-0.186371	0.18257	0.284784	27.6854	21.9616	24.3632	26.1656	26.3508	31.6996
ENSBTAG00000032588	ENSBTAT00000080009	-0.186371	0.18257	0.284784	27.6854	21.9616	24.3632	26.1656	26.3508	31.6996
ENSBTAG00000020525	ENSBTAT00000027346	0.0732846	0.134455	0.223005	69.7171	83.6597	68.876	73.5896	69.1385	68.5169
ENSBTAG00000010546	ENSBTAT00000030399	-0.276472	0.015393	0.0357641	5.54039	6.44388	6.11895	7.70116	7.33162	6.89438
ENSBTAG00000018151	ENSBTAT00000072121	0.16753	0.186963	0.290517	1.90693	1.48823	1.37965	1.30725	1.58339	1.36069
ENSBTAG00000014076	ENSBTAT00000018700	-0.0146314	0.716725	0.803056	9.76238	9.39591	10.9862	10.4756	11.1892	8.78689
ENSBTAG00000050234	ENSBTAT00000076377	-0.0494626	0.943552	0.964742	6.98885	6.38957	6.67617	7.00134	6.88455	6.86819
ENSBTAG00000003218	ENSBTAT00000004180	0.0315019	0.299675	0.42041	15.4309	14.9177	16.0407	15.5207	15.6275	14.2391
ENSBTAG00000021214	ENSBTAT00000028266	-0.0301295	0.734553	0.816424	13.9274	13.5005	14.1321	14.4315	14.4687	13.5369
ENSBTAG00000044374	ENSBTAT00000061807	0.293875	1	1	0.066367	0.156164	0.219333	0	0	0.360432
ENSBTAG00000001505	ENSBTAT00000068191	0.0202153	0.577859	0.689348	2.16984	2.29136	2.28384	2.38522	2.20813	2.05783
ENSBTAG00000014017	ENSBTAT00000067150	-0.223165	0.0309699	0.0649646	15.267	13.8973	15.3727	17.4505	17.2388	17.2983
ENSBTAG00000002215	ENSBTAT00000002867	1.71632	1.0787e-116	2.08138e-114	44.8616	48.2714	43.3867	14.2876	13.8704	13.3884
ENSBTAG00000009738	ENSBTAT00000049734	0.0193218	0.35808	0.482414	19.8206	21.1354	19.4909	18.4902	19.9087	21.2439
ENSBTAG00000017123	ENSBTAT00000073262	0.115798	0.347799	0.472384	5.31228	6.21253	3.56444	5.33986	4.10866	4.47692
ENSBTAG00000017123	ENSBTAT00000022760	0.115798	0.347799	0.472384	5.31228	6.21253	3.56444	5.33986	4.10866	4.47692
ENSBTAG00000004652	ENSBTAT00000006105	-1.50056	2.73092e-08	1.76862e-07	0.256875	0.129683	0.234662	0.604616	0.545881	0.607263
ENSBTAG00000013288	ENSBTAT00000017672	0.187338	0.00315072	0.00883918	13.3133	11.4907	13.6882	11.7	11.393	10.7117
ENSBTAG00000008578	ENSBTAT00000011312	-0.600673	3.03088e-10	2.43835e-09	20.301	20.3862	22.2092	32.3798	30.7374	32.2603
ENSBTAG00000017074	ENSBTAT00000022706	0.2103	0.0493218	0.0969371	3.19304	2.835	2.54598	2.20743	2.77088	2.43271
ENSBTAG00000012634	ENSBTAT00000016768	-0.560483	7.17984e-06	3.40001e-05	44.5761	44.8918	47.305	61.9979	59.5062	80.2033
ENSBTAG00000016874	ENSBTAT00000036270	0.311843	2.80125e-06	1.41236e-05	19.4378	19.8208	21.0085	15.5903	16.5949	16.3667
ENSBTAG00000021818	ENSBTAT00000076703	-0.0188597	0.634394	0.738315	11.8585	11.2783	10.7787	11.0629	11.7811	11.5178
ENSBTAG00000006082	ENSBTAT00000007993	-0.0842242	0.737247	0.818744	31.4813	33.7836	31.8715	33.15	32.793	37.0328
ENSBTAG00000016077	ENSBTAT00000021396	-0.0767174	0.862276	0.908855	6.8576	5.47597	6.6541	6.58696	6.35346	7.08428
ENSBTAG00000050244	ENSBTAT00000086552	0.279038	0.00381475	0.0104875	8.43486	7.22578	8.23245	6.82843	6.74919	6.11363
ENSBTAG00000025146	ENSBTAT00000054299	0.268564	0.00370952	0.0102298	4.8319	4.62941	4.85897	4.10397	3.89413	3.88982
ENSBTAG00000010303	ENSBTAT00000013608	-0.335	0.00596265	0.0155607	4.25915	4.41574	4.14003	5.27278	5.53515	5.35653
ENSBTAG00000040076	ENSBTAT00000018818	-0.441852	4.16103e-08	2.63995e-07	27.7459	28.7833	27.7989	39.0701	37.1526	38.3242
ENSBTAG00000008196	ENSBTAT00000010778	-0.356405	0.179109	0.280754	1.64175	1.1088	1.06846	1.92107	1.41488	1.55327
ENSBTAG00000030929	ENSBTAT00000043771	0.0753636	0.354392	0.478505	3.08846	2.97555	2.88504	2.83639	2.79093	2.86625
ENSBTAG00000048824	ENSBTAT00000067643	-0.411837	0.0257208	0.0556041	3.65485	4.55707	3.81791	5.29566	5.07264	5.63594
ENSBTAG00000048824	ENSBTAT00000067643	-0.411837	0.0257208	0.0556041	3.65485	4.55707	3.81791	5.29566	5.07264	5.63594
ENSBTAG00000011805	ENSBTAT00000015669	-0.755938	2.34066e-15	2.78952e-14	10.5703	10.3459	10.3026	16.9042	16.9465	18.8694
ENSBTAG00000018655	ENSBTAT00000024823	-0.470801	3.08063e-08	1.98348e-07	51.4835	50.6282	55.4535	71.8252	71.1244	75.4167
ENSBTAG00000005272	ENSBTAT00000006935	-0.0217635	0.800079	0.866017	7.0364	6.32558	7.79582	6.34016	7.09537	8.04386
ENSBTAG00000013624	ENSBTAT00000018110	-1.09355	4.67636e-33	1.3068e-31	6.90455	6.81978	5.77863	13.5155	13.9899	14.1137
ENSBTAG00000013623	ENSBTAT00000018109	-0.321074	0.00383913	0.0105394	47.5644	52.8362	54.0997	58.9952	62.5278	71.4881
ENSBTAG00000025477	ENSBTAT00000035821	-0.0615448	0.949928	0.969142	19.3059	18.8258	21.1572	22.169	20.7667	18.937
ENSBTAG00000025477	ENSBTAT00000035821	-0.0615448	0.949928	0.969142	19.3059	18.8258	21.1572	22.169	20.7667	18.937
ENSBTAG00000025443	ENSBTAT00000083520	0.346158	3.95569e-07	2.24279e-06	13.9464	13.2307	14.6608	10.3313	11.8544	10.7272
ENSBTAG00000000682	ENSBTAT00000000910	-0.017788	0.716498	0.80289	2.58444	2.40172	2.41037	2.33393	2.7846	2.36976
ENSBTAG00000017835	ENSBTAT00000023708	-0.286619	0.270004	0.388238	2.15613	2.51546	2.08155	2.61015	2.37439	3.25279
ENSBTAG00000006797	ENSBTAT00000008938	-0.617077	7.65079e-13	7.69256e-12	30.8226	29.6186	31.3925	43.9063	46.3533	50.5917
ENSBTAG00000009646	ENSBTAT00000012710	-0.155193	0.141394	0.23208	26.5381	26.7603	26.5604	29.5351	30.005	29.3883
ENSBTAG00000017451	ENSBTAT00000023198	-0.128178	0.309843	0.43173	30.8747	31.9569	31.7611	35.0431	33.1658	35.1725
ENSBTAG00000025426	ENSBTAT00000034204	-0.164066	0.140972	0.231731	11.5001	12.2598	11.7149	13.4042	13.8572	12.4859
ENSBTAG00000005009	ENSBTAT00000006594	-0.0559922	0.998438	1	98.5663	100.745	99.4682	102.726	100.088	107.789
ENSBTAG00000001394	ENSBTAT00000001830	-0.211546	0.0491948	0.0967188	121.859	122.039	125.804	136.732	134.5	156.856
ENSBTAG00000006368	ENSBTAT00000008355	1.73908	5.86747e-33	1.62471e-31	4.28521	4.43451	4.75199	1.21602	1.42483	1.39474
ENSBTAG00000019814	ENSBTAT00000026396	-0.142139	0.571246	0.683807	2.1579	2.03453	2.07492	2.24202	2.52195	2.15231
ENSBTAG00000010772	ENSBTAT00000014258	-0.48444	0.00127102	0.00392742	5.19065	5.60463	5.29858	7.03894	7.35106	8.126
ENSBTAG00000019714	ENSBTAT00000026274	-0.588771	5.43095e-12	5.12169e-11	17.395	18.4894	17.7824	25.3331	27.3378	28.0422
ENSBTAG00000015683	ENSBTAT00000020825	-0.0290318	0.693785	0.786355	74.931	72.9536	76.873	78.9068	78.6574	71.762
ENSBTAG00000021687	ENSBTAT00000084531	-0.214455	0.327986	0.451163	0.673492	0.575487	0.500841	0.673226	0.666823	0.690207
ENSBTAG00000021519	ENSBTAT00000028680	0.0498177	0.270124	0.388366	9.33352	10.6423	9.97004	9.71789	9.25924	9.95232
ENSBTAG00000021520	ENSBTAT00000080984	-0.462596	8.88885e-09	6.08377e-08	18.5946	18.7653	19.2717	26.8276	26.4893	24.7225
ENSBTAG00000012762	ENSBTAT00000016958	-0.0184846	0.699369	0.790105	12.2276	12.1234	13.1825	12.7756	14.2088	11.0331
ENSBTAG00000014744	ENSBTAT00000019620	-0.0164595	0.676401	0.772128	10.5568	9.67485	10.3685	10.7172	10.4411	9.79293
ENSBTAG00000014182	ENSBTAT00000018863	-0.0662549	0.88729	0.926544	69.9095	68.6701	68.6293	74.8232	74.0459	68.0775
ENSBTAG00000006756	ENSBTAT00000057156	-0.0562659	0.99701	1	90.8917	85.8845	95.3028	99.3823	100.733	82.7842
ENSBTAG00000006756	ENSBTAT00000057156	-0.0562659	0.99701	1	90.8917	85.8845	95.3028	99.3823	100.733	82.7842
ENSBTAG00000004161	ENSBTAT00000055723	-0.123201	0.317883	0.44034	77.8527	74.5813	76.2833	82.1656	83.6745	83.267
ENSBTAG00000015041	ENSBTAT00000020018	-0.374438	0.000242447	0.000885041	37.057	34.526	35.6027	47.1878	46.1147	45.646
ENSBTAG00000015042	ENSBTAT00000020021	-0.156563	0.16759	0.266313	28.2192	28.859	29.5809	31.1468	33.0084	32.4375
ENSBTAG00000053160	ENSBTAT00000073918	inf	1	1	0.23288	0	0	0	0	0
ENSBTAG00000045683	ENSBTAT00000064554	0.308538	0.0522714	0.101992	2.08348	1.51214	1.76849	1.21153	1.52247	1.5973
ENSBTAG00000017349	ENSBTAT00000023076	0.0396496	0.160271	0.256686	22.0157	22.4467	21.4028	21.0652	21.8643	21.1501
ENSBTAG00000011642	ENSBTAT00000083308	-0.148446	0.367619	0.492155	6.62639	6.22957	7.04172	7.47367	8.24623	6.33418
ENSBTAG00000052546	ENSBTAT00000078912	0.292672	1	1	0.485161	0.393937	0.308177	0.228595	0.382023	0.35866
ENSBTAG00000019950	ENSBTAT00000026575	0.121457	0.0923412	0.163654	7.44416	6.83564	6.67298	6.80175	7.06671	5.39256
ENSBTAG00000014615	ENSBTAT00000019462	0.128444	0.0894874	0.159487	7.60259	6.23329	7.50471	6.70501	6.7929	6.02483
ENSBTAG00000012768	ENSBTAT00000035157	-0.208624	0.0399759	0.0811723	12.7193	13.4084	14.0261	16.035	15.3335	15.0327
ENSBTAG00000010487	ENSBTAT00000013855	-0.376234	6.69325e-05	0.000269147	26.3205	25.3462	26.1336	31.3403	33.6814	35.9592
ENSBTAG00000020309	ENSBTAT00000027067	-0.317658	0.000204625	0.000758359	51.3584	51.8488	54.9726	67.9148	64.7501	64.4755
ENSBTAG00000005800	ENSBTAT00000007628	-0.667244	1.54088e-10	1.27421e-09	4.13866	4.01963	3.85247	6.50099	6.35507	6.21747
ENSBTAG00000017079	ENSBTAT00000022712	-0.0494557	0.943811	0.964881	11.323	9.65034	11.2237	11.2115	12.5237	9.58469
ENSBTAG00000008443	ENSBTAT00000011109	0.149086	0.0020723	0.0061054	63.3902	63.2335	62.4016	56.1542	57.9905	56.3223
ENSBTAG00000012086	ENSBTAT00000016027	0.217247	0.0024483	0.00707093	11.8004	10.8005	10.4343	9.34843	9.6221	9.44647
ENSBTAG00000010321	ENSBTAT00000013634	-0.00212475	0.458426	0.581284	34.2857	32.4205	33.1669	33.9269	33.213	32.8805
ENSBTAG00000021577	ENSBTAT00000079523	0.27758	0.000326771	0.00115775	14.7505	13.267	15.2206	11.9894	13.4513	10.2295
ENSBTAG00000005265	ENSBTAT00000006931	0.0645626	0.227273	0.338895	14.9976	15.5887	16.2215	16.6819	14.4325	13.6449
ENSBTAG00000024275	ENSBTAT00000042719	0.517628	2.90196e-06	1.45951e-05	7.51352	6.25389	6.90091	5.27425	4.4672	4.69577
ENSBTAG00000014906	ENSBTAT00000019852	-0.684514	3.27573e-21	5.55367e-20	51.8933	51.5283	52.3491	83.3952	86.8896	80.0639
ENSBTAG00000009565	ENSBTAT00000073443	-0.438593	1.64682e-07	9.7462e-07	16.8508	16.3277	17.9313	23.1937	24.3421	21.7323
ENSBTAG00000044077	ENSBTAT00000077677	-0.228614	0.2516	0.368	3.29445	3.09287	2.90058	3.48312	4.13537	3.26422
ENSBTAG00000006107	ENSBTAT00000008026	0.408833	7.86723e-05	0.000312836	4.29267	4.1194	4.74345	3.30842	3.7385	2.86224
ENSBTAG00000000874	ENSBTAT00000011029	0.301989	5.43639e-07	3.02448e-06	73.6471	74.5747	73.9754	61.7242	63.0866	55.4207
ENSBTAG00000019900	ENSBTAT00000026511	-0.115593	0.514593	0.634486	6.1467	5.41697	6.59493	6.37909	6.78865	6.50564
ENSBTAG00000055286	ENSBTAT00000083647	0.180338	0.0213245	0.0472341	8.35922	7.99379	9.09931	8.07303	7.86033	6.52822
ENSBTAG00000003051	ENSBTAT00000074821	-0.0136454	0.621033	0.726801	11.382	11.3678	11.234	12.1439	11.8035	10.3594
ENSBTAG00000003051	ENSBTAT00000074821	-0.0136454	0.621033	0.726801	11.382	11.3678	11.234	12.1439	11.8035	10.3594
ENSBTAG00000009667	ENSBTAT00000042610	0.0812435	0.116626	0.198003	15.9406	16.2189	17.8179	15.4402	16.7841	15.0164
ENSBTAG00000002281	ENSBTAT00000021140	-0.0348091	0.914224	0.945296	3.26687	2.55041	3.82132	2.75025	3.74824	3.3755
ENSBTAG00000004188	ENSBTAT00000005482	0.384778	1.5313e-05	6.89171e-05	8.96215	8.98852	9.98519	6.74331	7.47679	7.17589
ENSBTAG00000015618	ENSBTAT00000020744	0.183233	0.0772819	0.14118	6.47876	8.55077	7.68705	6.78434	6.60853	6.61424
ENSBTAG00000002566	ENSBTAT00000003320	-0.127215	0.448866	0.572491	5.01164	5.23857	5.03825	5.46876	6.15965	5.06938
ENSBTAG00000002566	ENSBTAT00000003320	-0.127215	0.448866	0.572491	5.01164	5.23857	5.03825	5.46876	6.15965	5.06938
ENSBTAG00000014579	ENSBTAT00000019403	-0.240403	0.125968	0.211123	12.2447	14.8976	12.9776	15.0402	14.9428	17.4115
ENSBTAG00000011125	ENSBTAT00000014779	-0.142371	0.238538	0.352758	13.5053	14.2048	13.3505	14.4513	15.2933	15.5747
ENSBTAG00000025908	ENSBTAT00000036708	0	1	1	NA	NA	NA	NA	NA	NA
ENSBTAG00000021818	ENSBTAT00000076703	-0.0188597	0.634394	0.738315	11.8585	11.2783	10.7787	11.0629	11.7811	11.5178
ENSBTAG00000016933	ENSBTAT00000022524	0.817355	1.01027e-33	2.88283e-32	28.1798	26.8363	27.7765	15.9258	15.609	15.4486
ENSBTAG00000016354	ENSBTAT00000021755	0.109833	0.129528	0.216076	16.2491	19.463	17.4812	18.9751	14.9412	15.3776
ENSBTAG00000016350	ENSBTAT00000021751	-0.416963	9.91693e-07	5.30591e-06	14.0504	15.0482	14.2106	19.8784	19.6965	18.2478
ENSBTAG00000015114	ENSBTAT00000020111	-0.804096	1.69893e-24	3.32563e-23	425.12	474.698	436.166	793.672	757.782	781.243
ENSBTAG00000016211	ENSBTAT00000045996	-0.0501571	0.965003	0.979834	3.9656	3.53763	3.66816	3.78158	4.01294	3.77209
ENSBTAG00000012046	ENSBTAT00000015987	-0.087523	0.698754	0.789929	70.4526	82.6761	78.2253	85.2466	79.0276	81.5496
ENSBTAG00000012046	ENSBTAT00000015987	-0.087523	0.698754	0.789929	70.4526	82.6761	78.2253	85.2466	79.0276	81.5496
ENSBTAG00000049339	ENSBTAT00000070879	-0.50219	0.0034434	0.00956536	0.946572	0.965697	1.20316	1.43708	1.52348	1.45201
ENSBTAG00000010179	ENSBTAT00000013440	1.69487	1.34909e-43	5.43032e-42	3.60818	3.17944	2.83652	0.895435	1.06815	1.00913
ENSBTAG00000010179	ENSBTAT00000013440	1.69487	1.34909e-43	5.43032e-42	3.60818	3.17944	2.83652	0.895435	1.06815	1.00913
ENSBTAG00000010179	ENSBTAT00000013440	1.69487	1.34909e-43	5.43032e-42	3.60818	3.17944	2.83652	0.895435	1.06815	1.00913
ENSBTAG00000010318	ENSBTAT00000013630	-0.291674	0.0672178	0.125688	10.3353	10.3215	10.0799	10.5189	13.1085	13.9961
ENSBTAG00000010318	ENSBTAT00000013630	-0.291674	0.0672178	0.125688	10.3353	10.3215	10.0799	10.5189	13.1085	13.9961
ENSBTAG00000003543	ENSBTAT00000004604	0.223966	0.00611324	0.0159093	15.3544	17.0281	16.0596	11.7862	14.2326	15.4578
ENSBTAG00000010727	ENSBTAT00000014200	-0.023907	0.79042	0.858962	4.4315	4.37836	4.90241	4.82135	4.90065	4.21939
ENSBTAG00000002148	ENSBTAT00000073232	0.0410044	0.259334	0.376459	9.49525	9.40434	8.56081	8.84436	9.41996	8.42659
ENSBTAG00000015487	ENSBTAT00000020586	0.318561	8.53339e-06	3.98356e-05	7.37432	7.43485	7.68527	5.72561	6.12471	6.18729
ENSBTAG00000037765	ENSBTAT00000055062	-0.207058	0.201737	0.3087	3.3939	3.46965	3.64926	4.41084	3.85071	3.87372
ENSBTAG00000000753	ENSBTAT00000001000	-0.218875	0.064365	0.121475	6.44856	6.62684	6.62542	8.09596	7.77335	7.059
ENSBTAG00000008396	ENSBTAT00000011049	-0.150075	0.263436	0.38132	18.8359	21.4242	19.4736	21.5368	22.4205	22.3249
ENSBTAG00000012181	ENSBTAT00000085254	-0.0182713	0.611932	0.718848	20.0968	18.4259	19.3712	18.648	20.214	19.7698
ENSBTAG00000012868	ENSBTAT00000017099	-0.165557	0.573621	0.685638	2.19551	2.28131	2.90104	2.4787	2.85732	2.93898
ENSBTAG00000008397	ENSBTAT00000011050	0.320384	0.0686012	0.127745	1.48146	1.11472	1.13435	1.0471	0.909064	1.03146
ENSBTAG00000025462	ENSBTAT00000035803	-0.0847495	0.747921	0.826385	45.7536	35.4957	38.9176	40.3805	44.2266	42.8304
ENSBTAG00000014956	ENSBTAT00000019913	-0.227437	0.136267	0.225586	6.94985	6.96668	7.78659	8.70582	8.30448	8.39871
ENSBTAG00000011252	ENSBTAT00000014945	-0.0414322	0.8581	0.906164	12.7869	12.6486	12.5677	13.5337	14.3747	11.2021
ENSBTAG00000005961	ENSBTAT00000052263	0.241305	0.000528499	0.00179187	11.8115	10.611	11.7402	10.0556	10.1161	8.72928
ENSBTAG00000014661	ENSBTAT00000019521	0.188295	0.0138503	0.0325656	8.78741	8.27937	9.82107	7.49907	8.63655	7.4623
ENSBTAG00000031135	ENSBTAT00000044060	1.96249	2.62028e-11	2.33691e-10	1.16606	0.623153	1.01754	0.250409	0.257707	0.212057
ENSBTAG00000002882	ENSBTAT00000072055	-2.38956	8.78623e-161	3.56018e-158	3.58814	3.91091	3.79405	20.7455	19.8993	18.5309
ENSBTAG00000009647	ENSBTAT00000035608	-0.123795	0.404734	0.529596	41.4543	42.6457	42.8044	50.0144	47.2077	41.0525
ENSBTAG00000017550	ENSBTAT00000023329	0.156737	0.0580364	0.111417	10.4196	9.24709	11.1133	9.07809	10.9277	7.60551
ENSBTAG00000020578	ENSBTAT00000027421	0.360983	0.0402313	0.0816448	0.94216	1.10717	0.904634	0.70799	0.94603	0.646038
ENSBTAG00000014320	ENSBTAT00000053358	0.237067	0.00136706	0.00420391	23.2532	23.1375	23.4088	21.8208	19.7867	17.6152
ENSBTAG00000014551	ENSBTAT00000019342	0.132812	0.0941909	0.166422	6.06241	5.15645	6.41249	5.5822	5.47244	5.02608
ENSBTAG00000010734	ENSBTAT00000014212	0.210112	0.0035219	0.00975666	26.8002	29.2944	27.3227	25.4696	22.6142	24.028
ENSBTAG00000005009	ENSBTAT00000006594	-0.0559922	0.998438	1	98.5663	100.745	99.4682	102.726	100.088	107.789
ENSBTAG00000006428	ENSBTAT00000008427	-0.205149	0.294273	0.414705	4.45543	3.303	3.54157	4.30322	4.33034	4.39314
ENSBTAG00000001546	ENSBTAT00000066191	-0.194115	0.0636759	0.120349	23.9416	26.3813	24.6362	29.1978	28.7909	27.7662
ENSBTAG00000019651	ENSBTAT00000026185	0.127782	0.351072	0.47534	2.21593	1.57871	1.59224	1.438	1.77981	1.71247
ENSBTAG00000009478	ENSBTAT00000012476	-1.11657	1	1	0.034978	0.036048	0.074449	0.048121	0.160413	0.106901
ENSBTAG00000009482	ENSBTAT00000012480	0.299721	3.7432e-06	1.84894e-05	28.6647	27.3814	29.9901	22.9689	25.4926	21.4351
ENSBTAG00000009482	ENSBTAT00000012480	0.299721	3.7432e-06	1.84894e-05	28.6647	27.3814	29.9901	22.9689	25.4926	21.4351
ENSBTAG00000030616	ENSBTAT00000035343	0.312011	0.00557624	0.0146593	8.28107	8.06998	9.60828	7.11694	6.71065	7.08312
ENSBTAG00000004602	ENSBTAT00000006039	-0.0957873	0.788131	0.857163	3.04749	3.36422	2.73961	3.58335	3.13219	3.06401
ENSBTAG00000016929	ENSBTAT00000022514	-0.34572	0.00181269	0.00542606	15.6121	13.9828	15.3656	17.6211	20.2635	19.2506
ENSBTAG00000011415	ENSBTAT00000035255	-0.00395917	0.505489	0.626118	73.3756	71.7098	77.4531	76.6521	80.3442	66.1538
ENSBTAG00000011415	ENSBTAT00000035255	-0.00395917	0.505489	0.626118	73.3756	71.7098	77.4531	76.6521	80.3442	66.1538
ENSBTAG00000011415	ENSBTAT00000035255	-0.00395917	0.505489	0.626118	73.3756	71.7098	77.4531	76.6521	80.3442	66.1538
ENSBTAG00000045306	ENSBTAT00000062739	-0.109104	1	1	5.91598	5.63393	7.23869	8.48447	5.51166	6.26847
ENSBTAG00000017957	ENSBTAT00000023876	-0.352135	0.0114653	0.0276641	7.30989	8.39771	8.45813	10.1614	9.90384	10.7811
ENSBTAG00000051779	ENSBTAT00000073542	-0.500974	2.71564e-07	1.56973e-06	30.5027	31.0701	29.6366	43.1376	38.8431	47.0961
ENSBTAG00000051779	ENSBTAT00000073542	-0.500974	2.71564e-07	1.56973e-06	30.5027	31.0701	29.6366	43.1376	38.8431	47.0961
ENSBTAG00000015041	ENSBTAT00000020018	-0.374438	0.000242447	0.000885041	37.057	34.526	35.6027	47.1878	46.1147	45.646
ENSBTAG00000018847	ENSBTAT00000025094	-0.108023	0.475104	0.597678	30.3992	31.4011	31.8857	32.7564	33.6991	34.5146
ENSBTAG00000019472	ENSBTAT00000077017	-0.00782007	0.564065	0.677547	17.8471	15.43	17.7657	17.0034	18.8031	15.5136
ENSBTAG00000012758	ENSBTAT00000016956	-0.206114	0.0294586	0.0622456	51.9352	49.9751	53.191	60.216	60.9202	57.785
ENSBTAG00000044169	ENSBTAT00000060989	-0.109054	0.667853	0.766395	3.34608	3.13787	3.26644	3.70379	3.38443	3.42778
ENSBTAG00000017151	ENSBTAT00000086696	-0.169093	0.477088	0.59943	0.9429	1.06346	0.865404	1.0889	1.06935	1.07063
ENSBTAG00000012834	ENSBTAT00000017050	-0.189124	0.316633	0.439132	3.59552	3.7854	3.63663	3.76765	3.89205	4.9011
ENSBTAG00000025124	ENSBTAT00000035145	-0.221147	0.407685	0.532311	1.19046	0.91367	1.21595	1.23527	1.40917	1.22565
ENSBTAG00000014835	ENSBTAT00000075057	0.40075	3.48771e-10	2.77646e-09	12374.9	13181.1	11824.4	9714.3	9147.65	9452.36
ENSBTAG00000008340	ENSBTAT00000010982	-0.304219	0.00617566	0.0160512	77.2555	77.2612	68.6802	90.0832	86.2866	99.2224
ENSBTAG00000052642	ENSBTAT00000086717	0.0859145	1	1	0.399406	0.257906	0.432255	0.515952	0.249163	0.261461
ENSBTAG00000050263	ENSBTAT00000018133	-0.121761	0.535258	0.652748	10.6697	10.6233	10.6045	11.8916	11.9342	10.8806
ENSBTAG00000016199	ENSBTAT00000021559	-0.0468883	0.895488	0.932861	50.1008	48.5298	46.7722	51.4503	53.3153	45.4406
ENSBTAG00000025099	ENSBTAT00000056189	-0.640542	6.20394e-14	6.76369e-13	12.4514	11.0242	12.9677	19.1928	19.0816	18.5376
ENSBTAG00000054287	ENSBTAT00000080305	1.01885	1.89599e-08	1.25123e-07	1.04249	1.22468	1.18201	0.644082	0.548072	0.510046
ENSBTAG00000030282	ENSBTAT00000042759	0.0823169	0.147916	0.24064	7.965	7.27825	7.04096	7.23489	6.81119	7.00224
ENSBTAG00000030282	ENSBTAT00000042759	0.0823169	0.147916	0.24064	7.965	7.27825	7.04096	7.23489	6.81119	7.00224
ENSBTAG00000008457	ENSBTAT00000011131	0.177059	0.00283653	0.00806192	28.1933	26.1971	29.8618	26.0462	24.8223	23.6529
ENSBTAG00000008457	ENSBTAT00000011131	0.177059	0.00283653	0.00806192	28.1933	26.1971	29.8618	26.0462	24.8223	23.6529
ENSBTAG00000020701	ENSBTAT00000086206	3.16904	0	0	71.2119	68.208	70.8666	7.49961	8.04388	7.83609
ENSBTAG00000014373	ENSBTAT00000019111	-0.0108549	0.637626	0.741065	22.3388	20.1692	22.9648	23.746	21.6334	20.5878
ENSBTAG00000027713	ENSBTAT00000039933	0.0103295	0.531774	0.649804	10.0712	11.3523	10.2455	10.9737	10.5869	9.88246
ENSBTAG00000007116	ENSBTAT00000009364	-0.125758	0.539774	0.656477	9.67018	8.13214	10.4246	11.0346	11.3241	8.43918
ENSBTAG00000007116	ENSBTAT00000009364	-0.125758	0.539774	0.656477	9.67018	8.13214	10.4246	11.0346	11.3241	8.43918
ENSBTAG00000003144	ENSBTAT00000000923	0.198254	0.218745	0.329046	0.862243	0.664771	0.95904	0.797649	0.786904	0.582303
ENSBTAG00000011763	ENSBTAT00000015624	0.124656	0.0278455	0.0593737	23.0226	23.0257	23.5271	23.0208	21.2675	19.5279
ENSBTAG00000020860	ENSBTAT00000034967	-0.00634983	0.549699	0.665088	14.8006	13.7062	14.3911	14.8279	15.7531	12.5061
ENSBTAG00000020860	ENSBTAT00000034967	-0.00634983	0.549699	0.665088	14.8006	13.7062	14.3911	14.8279	15.7531	12.5061
ENSBTAG00000021445	ENSBTAT00000028590	-0.794385	4.94085e-08	3.10553e-07	2.25675	2.15532	2.50234	3.77328	4.40223	3.81641
ENSBTAG00000027728	ENSBTAT00000039965	0.113755	0.308661	0.430483	2.19196	2.85266	2.63673	2.46118	2.85049	1.78727
ENSBTAG00000001081	ENSBTAT00000072269	0.0891309	0.0737715	0.135721	54.1144	57.7221	54.8158	48.6597	50.7719	57.2364
ENSBTAG00000016845	ENSBTAT00000056644	-0.85684	3.74775e-21	6.33625e-20	9.10535	8.43253	8.83974	16.2435	17.2086	14.3195
ENSBTAG00000016845	ENSBTAT00000056644	-0.85684	3.74775e-21	6.33625e-20	9.10535	8.43253	8.83974	16.2435	17.2086	14.3195
ENSBTAG00000000500	ENSBTAT00000000637	-0.10858	0.601682	0.709964	13.6345	13.2981	14.624	13.6375	15.97	15.1974
ENSBTAG00000008845	ENSBTAT00000049079	-0.197673	0.178575	0.280242	4.71731	5.00036	5.19894	5.56129	5.54396	6.00182
ENSBTAG00000006547	ENSBTAT00000008601	-0.115269	0.479459	0.601748	29.1823	29.9332	29.5082	32.5742	31.4321	31.9889
ENSBTAG00000005905	ENSBTAT00000048966	-0.108375	0.505833	0.626481	11.4093	10.862	10.7538	12.2344	12.2105	11.1566
ENSBTAG00000005905	ENSBTAT00000048966	-0.108375	0.505833	0.626481	11.4093	10.862	10.7538	12.2344	12.2105	11.1566
ENSBTAG00000013011	ENSBTAT00000017298	-0.0422909	0.845617	0.897992	25.3846	25.0623	25.8188	26.2773	27.6031	24.654
ENSBTAG00000013011	ENSBTAT00000017298	-0.0422909	0.845617	0.897992	25.3846	25.0623	25.8188	26.2773	27.6031	24.654
ENSBTAG00000051567	ENSBTAT00000083400	0.132146	0.102072	0.177459	12.6791	15.8176	13.5029	12.1701	12.1566	13.9968
ENSBTAG00000052735	ENSBTAT00000068813	-0.0589574	0.985719	0.992647	2.58989	2.06169	2.33665	2.50754	2.45514	2.31705
ENSBTAG00000012375	ENSBTAT00000016420	-0.145811	0.321898	0.444557	12.4118	10.9162	12.5859	13.7373	13.9328	12.0634
ENSBTAG00000014124	ENSBTAT00000067312	0.220102	0.0454435	0.0905443	4.65086	4.65529	4.08713	4.57781	3.70758	3.21281
ENSBTAG00000019843	ENSBTAT00000031479	-0.486533	1.25504e-06	6.60446e-06	8.92019	8.34202	8.4324	11.7945	13.3805	10.825
ENSBTAG00000003669	ENSBTAT00000004780	0.028181	0.29357	0.413995	10.1198	10.217	10.8906	10.1039	9.90729	10.6121
ENSBTAG00000043961	ENSBTAT00000061015	-0.313236	0.000232812	0.000851914	7.40596	7.45377	7.59672	9.32704	9.6487	8.92621
ENSBTAG00000010178	ENSBTAT00000066459	-0.370344	0.00017945	0.000674519	4.85096	4.40001	5.2163	6.08695	6.31964	6.29469
ENSBTAG00000015963	ENSBTAT00000067469	-0.322522	0.0169796	0.0389	12.7498	12.8158	11.8205	14.8868	14.7612	17.1039
ENSBTAG00000012168	ENSBTAT00000016139	-0.0505625	0.953982	0.972054	10.5627	10.273	11.6227	12.035	10.9842	10.597
ENSBTAG00000047550	ENSBTAT00000063356	0.00827045	0.490449	0.612356	4.29118	4.2264	4.19082	4.48611	4.48112	3.66853
ENSBTAG00000047550	ENSBTAT00000063356	0.00827045	0.490449	0.612356	4.29118	4.2264	4.19082	4.48611	4.48112	3.66853
ENSBTAG00000047550	ENSBTAT00000063356	0.00827045	0.490449	0.612356	4.29118	4.2264	4.19082	4.48611	4.48112	3.66853
ENSBTAG00000013357	ENSBTAT00000017765	-0.344154	0.000128115	0.000492212	22.4373	20.4744	22.6655	28.5005	28.0862	26.6574
ENSBTAG00000000269	ENSBTAT00000000335	-0.223422	0.128489	0.214489	9.73716	10.2239	9.06938	11.6556	11.9488	10.2886
ENSBTAG00000009917	ENSBTAT00000067151	0.348386	1	1	0.176333	0.0172567	0.0550864	0.059385	0.109088	0.0268533
ENSBTAG00000009917	ENSBTAT00000067151	0.348386	1	1	0.176333	0.0172567	0.0550864	0.059385	0.109088	0.0268533
ENSBTAG00000011770	ENSBTAT00000075921	0.247183	0.000191673	0.000713841	11.6634	12.7407	11.6833	10.5589	10.6222	9.22398
ENSBTAG00000017369	ENSBTAT00000023092	-0.327386	0.040823	0.0825697	3.57905	2.77634	3.77002	4.5854	4.14215	3.97719
ENSBTAG00000018437	ENSBTAT00000061396	-0.115062	0.441866	0.565223	14.4517	15.4716	15.5834	16.728	17.0929	15.4638
ENSBTAG00000008101	ENSBTAT00000076846	0.417931	2.70952e-07	1.56693e-06	3.97525	4.48554	4.31853	3.00524	3.3146	3.24544
ENSBTAG00000020752	ENSBTAT00000036653	-1.10487	8.55724e-31	2.18533e-29	4.79009	4.20073	4.54267	9.89454	9.63695	9.57629
ENSBTAG00000003532	ENSBTAT00000075126	-0.18818	0.215177	0.325011	3.7709	3.45766	3.29545	4.13486	4.10219	3.75323
ENSBTAG00000003532	ENSBTAT00000075126	-0.18818	0.215177	0.325011	3.7709	3.45766	3.29545	4.13486	4.10219	3.75323
ENSBTAG00000011397	ENSBTAT00000069266	0.565375	3.76507e-05	0.000159471	1.04119	1.26774	0.995732	0.739442	0.740209	0.753576
ENSBTAG00000021696	ENSBTAT00000028915	-0.613679	1	1	0.30649	0.149309	0.275332	0.210061	0.342966	0.565718
ENSBTAG00000025859	ENSBTAT00000028791	0.0828758	0.157435	0.253113	10.2766	9.55305	9.95295	9.09329	9.90835	9.11835
ENSBTAG00000012243	ENSBTAT00000016250	0.0614548	0.205855	0.313266	15.1377	13.5684	15.3307	13.3248	15.2041	13.6714
ENSBTAG00000046574	ENSBTAT00000070127	-0.669858	1.05228e-07	6.3576e-07	1.27456	1.344	1.23984	2.06862	2.01823	2.05154
ENSBTAG00000003719	ENSBTAT00000083775	0.0638848	0.155209	0.250196	6.60925	6.87096	6.98322	6.62618	6.48254	6.46831
ENSBTAG00000018035	ENSBTAT00000073237	-0.0914509	0.638783	0.741788	29.9449	28.4009	29.2219	29.3587	33.1572	30.7823
ENSBTAG00000008016	ENSBTAT00000010541	-0.318811	0.00872487	0.0217916	7.47515	6.99802	7.38533	9.29817	9.19418	8.7718
ENSBTAG00000009806	ENSBTAT00000069660	-0.0316746	0.764483	0.838496	7.76753	6.8517	7.31872	7.63014	7.71593	7.07885
ENSBTAG00000019225	ENSBTAT00000068468	0.151613	0.00476994	0.0127548	17.285	15.6838	16.4262	15.1896	15.3752	13.9027
ENSBTAG00000035958	ENSBTAT00000050448	-0.11293	0.67452	0.771136	1.39165	1.60674	1.3737	1.50614	1.59747	1.62448
ENSBTAG00000019099	ENSBTAT00000025426	-0.652062	5.29077e-12	4.99337e-11	10.4441	10.5438	10.0499	16.0571	17.2543	15.4619
ENSBTAG00000015513	ENSBTAT00000020616	0.792972	4.05697e-12	3.88013e-11	1.67103	2.00996	1.96447	1.14519	1.09063	1.02248
ENSBTAG00000018317	ENSBTAT00000078062	-0.218247	0.0285669	0.0606956	20.328	19.2302	20.8774	23.2337	24.5928	22.4792
ENSBTAG00000016265	ENSBTAT00000021637	-0.142201	0.218599	0.328954	89.6128	81.4573	88.4143	96.672	93.3415	96.3503
ENSBTAG00000054773	ENSBTAT00000087064	-0.29716	0.0011038	0.00348062	33.098	34.0597	32.8226	42.7122	42.2505	37.8853
ENSBTAG00000008376	ENSBTAT00000066981	-0.375846	0.198092	0.304502	0.237217	0.265192	0.171701	0.283063	0.292244	0.299418
ENSBTAG00000021135	ENSBTAT00000028164	-0.349073	0.0379651	0.0775505	4.70693	3.63796	4.80589	5.73727	6.31581	4.69764
ENSBTAG00000000738	ENSBTAT00000000982	0.280924	0.000188864	0.000705187	3.89534	4.02948	4.31723	3.48096	3.49638	3.09864
ENSBTAG00000000699	ENSBTAT00000000938	0.3941	9.17648e-10	6.94146e-09	29.3087	31.103	29.8688	22.5916	22.2173	23.8913
ENSBTAG00000000699	ENSBTAT00000000938	0.3941	9.17648e-10	6.94146e-09	29.3087	31.103	29.8688	22.5916	22.2173	23.8913
ENSBTAG00000020626	ENSBTAT00000050778	-0.122106	0.5438	0.660269	5.24579	5.03622	5.70877	6.26502	6.45425	4.68386
ENSBTAG00000020626	ENSBTAT00000027486	-0.122106	0.5438	0.660269	5.24579	5.03622	5.70877	6.26502	6.45425	4.68386
ENSBTAG00000020626	ENSBTAT00000027486	-0.122106	0.5438	0.660269	5.24579	5.03622	5.70877	6.26502	6.45425	4.68386
ENSBTAG00000005803	ENSBTAT00000083815	0.0745449	0.225944	0.337541	3.50666	3.25657	3.35436	3.40253	3.32168	2.88387
ENSBTAG00000005092	ENSBTAT00000061589	-0.288841	0.000825843	0.00267206	30.8922	32.1901	31.3444	37.2736	39.807	38.2766
ENSBTAG00000052146	ENSBTAT00000077901	-0.0313236	0.906375	0.939933	1.50954	1.26746	1.69676	1.29306	1.6134	1.66549
ENSBTAG00000015348	ENSBTAT00000020403	-0.128103	0.537881	0.654699	6.92718	5.5956	6.89347	6.92104	7.44225	6.85587
ENSBTAG00000008772	ENSBTAT00000011562	-1.54407	9.07242e-55	4.85834e-53	2.84124	2.99638	3.19075	8.97566	9.33459	8.01788
ENSBTAG00000010247	ENSBTAT00000013538	-0.410685	0.000662685	0.00219319	8.20688	7.5783	8.41818	11.1802	10.4544	10.5394
ENSBTAG00000019187	ENSBTAT00000025536	-0.665815	5.65829e-18	7.9609e-17	5.60315	5.61403	5.78444	8.72026	9.11553	9.13667
ENSBTAG00000001926	ENSBTAT00000002506	-0.0853335	0.70524	0.794595	93.6348	91.0856	90.0521	101.042	102.804	87.6689
ENSBTAG00000014471	ENSBTAT00000076228	-0.308097	0.000248775	0.000905964	41.8549	43.5005	42.8888	52.5401	55.2679	50.9678
ENSBTAG00000002744	ENSBTAT00000003558	-0.286751	0.111266	0.190458	4.95322	6.60814	4.53305	6.41259	6.09484	7.12599
ENSBTAG00000030960	ENSBTAT00000011980	-0.0363054	0.858157	0.906164	13.3158	12.3605	14.8632	15.0953	14.3751	12.1022
ENSBTAG00000005115	ENSBTAT00000074514	0.440479	0.000454053	0.00156359	6.33761	5.59376	6.4716	4.22489	5.28021	4.05586
ENSBTAG00000004571	ENSBTAT00000006004	-0.158938	0.292044	0.412465	11.2501	9.38658	10.5341	12.5929	11.6327	10.5755
ENSBTAG00000004499	ENSBTAT00000005904	-1.10491	5.54341e-23	1.00877e-21	3.74006	3.50197	4.21498	7.8913	7.68177	9.06931
ENSBTAG00000004499	ENSBTAT00000005904	-1.10491	5.54341e-23	1.00877e-21	3.74006	3.50197	4.21498	7.8913	7.68177	9.06931
ENSBTAG00000000204	ENSBTAT00000055284	0.101549	0.130679	0.217607	6.20426	6.34331	5.84781	5.97725	5.67714	5.49069
ENSBTAG00000048407	ENSBTAT00000082404	-0.0293367	0.848614	0.899206	2.69887	2.36447	2.57713	2.27599	2.94424	2.57721
ENSBTAG00000048407	ENSBTAT00000082404	-0.0293367	0.848614	0.899206	2.69887	2.36447	2.57713	2.27599	2.94424	2.57721
ENSBTAG00000005403	ENSBTAT00000079138	-0.319058	0.00931399	0.0230452	11.8967	10.195	12.1606	12.8938	14.2566	15.5798
ENSBTAG00000018387	ENSBTAT00000065800	0.155355	0.103492	0.17967	6.27467	7.61583	6.68862	5.48186	5.865	7.13137
ENSBTAG00000022013	ENSBTAT00000029363	0.193305	0.0080335	0.020252	9.2555	8.68617	8.13734	7.68465	8.23881	6.88525
ENSBTAG00000001508	ENSBTAT00000001976	-0.341687	0.000848165	0.00273773	8.74076	7.19962	8.06197	9.898	10.5191	9.99953
ENSBTAG00000044123	ENSBTAT00000061276	-0.0713502	0.933719	0.958882	2.98078	2.54694	2.31858	2.51282	2.24758	3.48371
ENSBTAG00000006715	ENSBTAT00000008831	0.0741595	0.153082	0.247389	9.34624	8.7928	10.0756	8.28851	9.40132	9.11109
ENSBTAG00000012432	ENSBTAT00000016504	1.77659	5.65066e-71	4.18838e-69	23.7026	25.6842	20.9302	7.27876	6.35643	6.88845
ENSBTAG00000003726	ENSBTAT00000004852	0.11644	0.114764	0.195389	6.39016	5.66983	6.92368	5.41859	6.39617	5.69693
ENSBTAG00000010819	ENSBTAT00000066390	-0.0388856	0.886179	0.92594	2.68958	3.08579	2.70629	2.60273	2.94954	3.1611
ENSBTAG00000035084	ENSBTAT00000061597	-0.705048	3.55889e-11	3.13946e-10	5.54208	5.21006	5.42388	8.60277	9.67191	8.09544
ENSBTAG00000002730	ENSBTAT00000003541	-0.000143774	0.52101	0.640449	8.95864	8.28851	8.26373	8.61314	8.29038	8.60989
ENSBTAG00000043171	ENSBTAT00000060163	-2.54995	1	1	0	0	0.197289	0.609899	0.545449	0
ENSBTAG00000053413	ENSBTAT00000066680	0.00881883	0.732242	0.814674	3.67723	3.21805	3.52398	3.40519	3.12229	3.82828
ENSBTAG00000003097	ENSBTAT00000068450	-0.138538	0.240116	0.354573	13.3159	13.1896	13.9809	14.6655	15.5673	14.3342
ENSBTAG00000033543	ENSBTAT00000031476	-0.0588603	0.969794	0.98232	49.1171	52.1519	53.2641	55.4247	52.5289	53.0147
ENSBTAG00000002997	ENSBTAT00000061071	1.45901	2.90033e-61	1.7988e-59	5.11512	4.63966	5.10935	1.79197	1.71515	1.8996
ENSBTAG00000001847	ENSBTAT00000081095	0.356176	5.64607e-06	2.71387e-05	5.92528	5.44284	5.72489	4.59645	4.71982	4.03734
ENSBTAG00000015788	ENSBTAT00000078315	0.250959	0.124086	0.208398	0.501017	0.511736	0.562578	0.463298	0.477984	0.382528
ENSBTAG00000004592	ENSBTAT00000068560	-0.0268682	0.767095	0.840755	11.2328	11.1731	10.0781	11.2827	11.5512	10.2608
ENSBTAG00000010431	ENSBTAT00000035504	-0.872562	1.17502e-05	5.38796e-05	2.19576	1.44481	2.05466	3.89936	3.51223	3.01585
ENSBTAG00000020815	ENSBTAT00000027737	0.113704	0.0351076	0.0725056	14.0306	13.177	14.4848	13.7093	12.4951	12.3282
ENSBTAG00000020815	ENSBTAT00000027737	0.113704	0.0351076	0.0725056	14.0306	13.177	14.4848	13.7093	12.4951	12.3282
ENSBTAG00000000095	ENSBTAT00000008067	1.39139	1.09882e-13	1.17478e-12	3.5127	3.00305	4.17471	1.55813	1.37249	1.14457
ENSBTAG00000012047	ENSBTAT00000015986	0.278773	0.00153832	0.00468316	9.26769	7.26297	9.1067	7.04963	7.77546	6.30757
ENSBTAG00000029932	ENSBTAT00000042311	inf	1	1	0	0	0.005193	0	0	0
ENSBTAG00000017137	ENSBTAT00000022777	0.317663	5.16378e-05	0.000213072	26.6278	25.4112	29.5478	23.2029	23.0679	19.1918
ENSBTAG00000019125	ENSBTAT00000025456	1.61266	6.54405e-19	9.713e-18	1.07387	1.10448	1.06624	0.327402	0.378287	0.355274
ENSBTAG00000008062	ENSBTAT00000010604	0.0867284	0.0792218	0.143858	16.6313	14.8489	16.5361	15.1697	15.8262	14.2189
ENSBTAG00000005826	ENSBTAT00000077879	0.0547215	0.473984	0.596516	4.5385	3.44187	4.7063	4.02226	4.3959	3.79631
ENSBTAG00000005090	ENSBTAT00000077502	-1.13041	8.25569e-43	3.22689e-41	7.85744	7.31069	8.409	18.058	17.6324	15.925
ENSBTAG00000005090	ENSBTAT00000077502	-1.13041	8.25569e-43	3.22689e-41	7.85744	7.31069	8.409	18.058	17.6324	15.925
ENSBTAG00000006816	ENSBTAT00000008957	-0.125202	0.663195	0.762633	3.95857	2.85778	4.21697	3.73588	4.76146	3.53626
ENSBTAG00000009417	ENSBTAT00000012394	0.466632	9.82788e-10	7.39738e-09	35.0685	29.5585	32.6291	23.8041	25.2676	21.3079
ENSBTAG00000012991	ENSBTAT00000017205	-0.0780781	0.825529	0.884239	6.9985	5.33862	7.60208	6.7578	7.35417	6.93607
ENSBTAG00000015000	ENSBTAT00000019970	-0.122341	0.322148	0.44475	145.772	144.998	147.131	155.372	158.535	162.748
ENSBTAG00000011394	ENSBTAT00000015139	-0.200732	0.168543	0.267433	3.89651	4.46099	4.57212	4.67882	5.23192	4.94905
ENSBTAG00000011431	ENSBTAT00000073289	-0.0898805	0.700177	0.790723	10.3958	10.0983	9.19798	10.2342	10.8133	10.5533
ENSBTAG00000007761	ENSBTAT00000010202	-0.19316	0.155825	0.251027	7.24676	8.11887	7.24482	9.07798	8.4544	8.31735
ENSBTAG00000032777	ENSBTAT00000046547	-0.704946	4.79584e-08	3.02063e-07	48.1075	49.9799	52.4847	72.3113	72.9585	100.175
ENSBTAG00000014936	ENSBTAT00000019883	0.319185	0.000759369	0.00247908	11.7269	10.9212	12.6682	10.146	10.6144	7.54653
ENSBTAG00000005133	ENSBTAT00000006765	-0.0713114	0.894023	0.931558	5.61328	6.1026	5.63027	5.5733	5.80525	6.84655
ENSBTAG00000002454	ENSBTAT00000003187	-0.0895052	0.807396	0.871024	7.55664	7.36793	10.1599	10.1166	8.89083	7.68256
ENSBTAG00000044003	ENSBTAT00000061149	-0.227466	0.0577834	0.111019	6.28571	7.03467	6.80782	7.81916	8.01855	7.72793
ENSBTAG00000000841	ENSBTAT00000072022	0.452031	9.69284e-10	7.30026e-09	8.74688	7.58394	8.23688	6.16658	5.7063	6.08644
ENSBTAG00000003483	ENSBTAT00000004527	0.0362789	0.612132	0.718945	1.95921	1.97928	2.23993	2.00896	2.1535	1.86252
ENSBTAG00000005470	ENSBTAT00000007195	-0.422653	0.0003762	0.00131827	10.0807	10.4602	11.5218	14.3761	13.2902	15.3103
ENSBTAG00000006768	ENSBTAT00000071190	-0.028116	0.710808	0.79828	12.2285	12.699	13.4859	13.5127	12.7834	12.8732
ENSBTAG00000002252	ENSBTAT00000002910	0	1	1	NA	NA	NA	NA	NA	NA
ENSBTAG00000015249	ENSBTAT00000020286	-0.241556	0.00697497	0.0178538	26.9669	26.6748	26.3085	31.7812	32.5439	30.1974
ENSBTAG00000051957	ENSBTAT00000083781	-0.875963	1	1	0	0	0.091887	0.168634	0	0
ENSBTAG00000017845	ENSBTAT00000023720	-0.198634	0.0500651	0.0981915	40.9137	42.5942	43.6713	50.7006	49.4438	45.8079
ENSBTAG00000003323	ENSBTAT00000004312	-0.32101	0.00243672	0.00704009	6.68354	6.40696	6.03235	7.57668	7.88973	8.42194
ENSBTAG00000016295	ENSBTAT00000021677	-0.137982	0.49514	0.616653	8.1047	6.68888	7.87038	8.76972	8.53225	7.63665
ENSBTAG00000005247	ENSBTAT00000006906	0.10812	0.195916	0.301692	2.60801	2.30298	2.93083	2.60719	2.50113	2.16728
ENSBTAG00000020436	ENSBTAT00000027236	-0.320058	0.00549579	0.014476	5.86852	5.26943	5.71182	7.65279	7.26371	6.11843
ENSBTAG00000020436	ENSBTAT00000027236	-0.320058	0.00549579	0.014476	5.86852	5.26943	5.71182	7.65279	7.26371	6.11843
ENSBTAG00000053156	ENSBTAT00000079550	0.0668979	0.079373	0.143987	44.4485	41.2408	43.5704	41.6183	42.2916	39.4928
ENSBTAG00000001737	ENSBTAT00000085249	0.0656767	0.127542	0.213113	10.0485	9.43748	10.0459	9.78945	9.96285	8.46536
ENSBTAG00000001737	ENSBTAT00000085249	0.0656767	0.127542	0.213113	10.0485	9.43748	10.0459	9.78945	9.96285	8.46536
ENSBTAG00000001737	ENSBTAT00000085249	0.0656767	0.127542	0.213113	10.0485	9.43748	10.0459	9.78945	9.96285	8.46536
ENSBTAG00000001737	ENSBTAT00000085249	0.0656767	0.127542	0.213113	10.0485	9.43748	10.0459	9.78945	9.96285	8.46536
ENSBTAG00000046803	ENSBTAT00000065839	-0.292526	0.207703	0.315604	3.14121	4.19241	2.9828	3.66749	4.41096	4.55693
ENSBTAG00000009903	ENSBTAT00000013074	-0.165861	0.316715	0.439195	1.60672	1.46915	1.43833	1.69697	1.78196	1.58527
ENSBTAG00000011589	ENSBTAT00000075759	-0.301202	0.00954574	0.0235371	4.92223	4.56804	4.94826	6.11663	6.41839	5.2557
ENSBTAG00000031682	ENSBTAT00000013807	-0.559031	4.76004e-06	2.30806e-05	5.98961	5.09327	5.28381	8.30835	8.80625	6.9981
ENSBTAG00000031682	ENSBTAT00000013807	-0.559031	4.76004e-06	2.30806e-05	5.98961	5.09327	5.28381	8.30835	8.80625	6.9981
ENSBTAG00000031682	ENSBTAT00000013807	-0.559031	4.76004e-06	2.30806e-05	5.98961	5.09327	5.28381	8.30835	8.80625	6.9981
ENSBTAG00000031682	ENSBTAT00000013807	-0.559031	4.76004e-06	2.30806e-05	5.98961	5.09327	5.28381	8.30835	8.80625	6.9981
ENSBTAG00000000974	ENSBTAT00000001290	-0.610731	2.09066e-15	2.50139e-14	76.3237	73.1331	78.9105	118.735	120.413	109.576
ENSBTAG00000018613	ENSBTAT00000024770	-0.0896496	0.741739	0.821755	11.5601	10.0727	11.7581	13.0589	12.6189	9.85373
ENSBTAG00000018613	ENSBTAT00000024770	-0.0896496	0.741739	0.821755	11.5601	10.0727	11.7581	13.0589	12.6189	9.85373
ENSBTAG00000011814	ENSBTAT00000068875	-2.24693	2.8851e-36	9.25364e-35	1.67542	1.26955	1.67123	7.09375	8.30138	6.5167
ENSBTAG00000011859	ENSBTAT00000015737	-0.618529	2.80324e-11	2.49643e-10	7.63446	6.72042	7.37696	10.3338	11.781	11.2503
ENSBTAG00000046549	ENSBTAT00000065971	-0.151884	0.176535	0.277758	13.9904	13.2764	13.5376	14.879	15.5198	14.9356
ENSBTAG00000046549	ENSBTAT00000065971	-0.151884	0.176535	0.277758	13.9904	13.2764	13.5376	14.879	15.5198	14.9356
ENSBTAG00000003044	ENSBTAT00000003961	0.268752	0.000145924	0.000555194	11.228	10.5654	12.4729	9.92769	9.93844	8.5762
ENSBTAG00000008962	ENSBTAT00000011798	-0.348031	0.0110232	0.0267759	10.7957	10.4671	10.9954	13.9676	14.4907	12.6008
ENSBTAG00000015358	ENSBTAT00000065235	0.135068	0.591983	0.701297	0.357677	0.425205	0.149861	0.261504	0.175002	0.412875
ENSBTAG00000020661	ENSBTAT00000027538	-1.71954	2.91657e-41	1.10105e-39	0.729755	0.700637	0.643042	2.04819	2.409	2.37129
ENSBTAG00000020355	ENSBTAT00000027125	0.483939	5.8372e-10	4.52532e-09	14.5614	17.0252	16.8186	11.0321	12.0265	11.5522
ENSBTAG00000018841	ENSBTAT00000025085	0.119391	0.334831	0.458262	0.720159	0.945117	0.850166	0.685632	0.774947	0.855077
ENSBTAG00000020243	ENSBTAT00000001939	0.671049	9.20685e-28	2.05732e-26	58.7036	56.5427	57.177	35.6216	36.5183	36.1505
ENSBTAG00000016750	ENSBTAT00000022272	-0.217965	0.0734615	0.135282	9.49777	8.88067	10.1199	11.727	11.08	10.3391
ENSBTAG00000019275	ENSBTAT00000025666	-0.0781573	0.9062	0.939832	9.96405	9.67135	9.84255	10.5241	11.8946	8.70024
ENSBTAG00000005116	ENSBTAT00000006746	0.160775	0.00535213	0.0141344	12.2296	12.7834	12.7826	11.9983	10.5919	11.2196
ENSBTAG00000005116	ENSBTAT00000006746	0.160775	0.00535213	0.0141344	12.2296	12.7834	12.7826	11.9983	10.5919	11.2196
ENSBTAG00000005116	ENSBTAT00000006746	0.160775	0.00535213	0.0141344	12.2296	12.7834	12.7826	11.9983	10.5919	11.2196
ENSBTAG00000000250	ENSBTAT00000000314	-0.368948	0.0184394	0.04171	3.71754	3.59308	3.62269	4.9805	4.48701	4.65188
ENSBTAG00000000250	ENSBTAT00000000314	-0.368948	0.0184394	0.04171	3.71754	3.59308	3.62269	4.9805	4.48701	4.65188
ENSBTAG00000013706	ENSBTAT00000043692	1.02267	4.5235e-19	6.7886e-18	4.74212	3.98535	4.65453	2.26638	2.26627	2.05402
ENSBTAG00000000712	ENSBTAT00000085937	0.0444856	0.20433	0.311453	18.3194	16.839	18.2271	17.7174	16.8234	17.2237
ENSBTAG00000016952	ENSBTAT00000022548	-0.0652735	0.91066	0.943167	22.6591	22.6481	23.4155	24.5632	25.267	22.0732
ENSBTAG00000003012	ENSBTAT00000043659	-0.633261	0.0012015	0.00374402	0.893353	0.994345	0.934456	1.28534	1.55929	1.53271
ENSBTAG00000020498	ENSBTAT00000027314	-0.337999	0.00194195	0.00576187	15.8259	14.8869	17.9679	20.0505	21.4216	20.0605
ENSBTAG00000019139	ENSBTAT00000025476	0.164083	0.00342738	0.00952303	18.721	18.2025	18.8715	17.0487	17.7485	14.9995
ENSBTAG00000019139	ENSBTAT00000025476	0.164083	0.00342738	0.00952303	18.721	18.2025	18.8715	17.0487	17.7485	14.9995
ENSBTAG00000002171	ENSBTAT00000061569	0.0707401	0.206272	0.313784	3.89941	3.72714	4.22159	3.77917	4.07019	3.43185
ENSBTAG00000016374	ENSBTAT00000021778	-0.21457	0.203053	0.310128	6.00075	6.7661	7.18503	7.18647	8.44449	7.52035
ENSBTAG00000005869	ENSBTAT00000007718	-0.129738	0.388109	0.513239	30.5852	26.6013	28.7683	32.4326	33.9183	27.6917
ENSBTAG00000005869	ENSBTAT00000007718	-0.129738	0.388109	0.513239	30.5852	26.6013	28.7683	32.4326	33.9183	27.6917
ENSBTAG00000049321	ENSBTAT00000076845	-0.855818	0.0014021	0.00430185	2.47707	1.84464	3.97764	4.84489	4.86866	5.30648
ENSBTAG00000000676	ENSBTAT00000061076	0.0172737	0.375979	0.501218	4.29371	4.13319	4.64503	4.19151	4.6244	4.10044
ENSBTAG00000000676	ENSBTAT00000061076	0.0172737	0.375979	0.501218	4.29371	4.13319	4.64503	4.19151	4.6244	4.10044
ENSBTAG00000000676	ENSBTAT00000061076	0.0172737	0.375979	0.501218	4.29371	4.13319	4.64503	4.19151	4.6244	4.10044
ENSBTAG00000000679	ENSBTAT00000071281	-0.303216	0.00112795	0.00354483	30.3357	25.8955	28.1036	35.3094	35.4807	33.27
ENSBTAG00000052055	ENSBTAT00000068329	0.635277	2.04125e-21	3.48503e-20	23.8089	22.8302	22.6197	15.0655	15.3032	14.2213
ENSBTAG00000003919	ENSBTAT00000005116	0.785706	1.05963e-27	2.35482e-26	22.0949	21.6533	21.4792	13.0293	12.9061	11.9009
ENSBTAG00000003887	ENSBTAT00000073487	-0.110729	0.509446	0.629673	28.5983	25.574	29.9702	30.865	32.5536	27.4363
ENSBTAG00000038849	ENSBTAT00000056240	0.91605	4.30467e-05	0.000180192	1.28667	1.02105	1.29579	0.71034	0.758839	0.440528
ENSBTAG00000024381	ENSBTAT00000061143	-0.435131	7.98896e-07	4.34319e-06	156.067	144.896	158.449	212.165	223.071	185.905
ENSBTAG00000012929	ENSBTAT00000017179	0.357657	6.23457e-05	0.000252625	5.15978	5.02314	5.69172	4.2056	4.16052	4.02294
ENSBTAG00000016046	ENSBTAT00000021350	0.306479	4.04432e-06	1.98436e-05	18.0865	18.7625	19.1319	15.5496	14.7551	14.9621
ENSBTAG00000003878	ENSBTAT00000005061	-0.0434289	0.911562	0.943591	6.22782	6.00272	5.67025	6.54065	6.45671	5.45048
ENSBTAG00000010885	ENSBTAT00000014457	0.00906521	0.358647	0.483018	25.6391	27.3976	26.7553	27.28	26.5352	25.477
ENSBTAG00000009127	ENSBTAT00000012028	-0.2766	0.069581	0.129232	2.35999	2.28974	2.11974	2.88525	2.88384	2.43102
ENSBTAG00000010760	ENSBTAT00000060948	1.17042	9.50045e-43	3.70152e-41	8.60612	8.19706	8.57825	3.81655	4.21728	3.24292
ENSBTAG00000010760	ENSBTAT00000060948	1.17042	9.50045e-43	3.70152e-41	8.60612	8.19706	8.57825	3.81655	4.21728	3.24292
ENSBTAG00000007288	ENSBTAT00000009583	-0.00373255	0.568969	0.681754	7.80461	8.75354	8.63026	8.25296	8.38466	8.61605
ENSBTAG00000010116	ENSBTAT00000020294	-0.274428	1	1	0.280269	0.203077	0.205165	0.237385	0.396023	0.199356
ENSBTAG00000010113	ENSBTAT00000013338	0.100017	0.143246	0.234423	3.74126	3.39421	3.64397	3.68407	3.42657	2.94682
ENSBTAG00000010113	ENSBTAT00000013338	0.100017	0.143246	0.234423	3.74126	3.39421	3.64397	3.68407	3.42657	2.94682
ENSBTAG00000017992	ENSBTAT00000023937	0.356389	1.49942e-07	8.92168e-07	289.505	332.181	304.008	254.45	240.981	227.645
ENSBTAG00000016562	ENSBTAT00000022030	0.0708928	0.0746358	0.136988	44.2491	43.5045	45.269	43.5963	43.9774	39.0702
ENSBTAG00000020482	ENSBTAT00000065100	-0.310295	0.000324029	0.00114937	7.80319	7.96236	7.84014	9.96975	9.79303	9.50735
ENSBTAG00000020482	ENSBTAT00000027294	-0.310295	0.000324029	0.00114937	7.80319	7.96236	7.84014	9.96975	9.79303	9.50735
ENSBTAG00000018528	ENSBTAT00000067380	-0.158857	0.542548	0.659126	2.9674	2.48201	2.53282	3.36092	3.29118	2.25927
ENSBTAG00000019730	ENSBTAT00000026293	0.0317875	0.232959	0.345981	36.0467	36.0795	37.1741	37.8286	36.5219	32.5678
ENSBTAG00000019730	ENSBTAT00000026293	0.0317875	0.232959	0.345981	36.0467	36.0795	37.1741	37.8286	36.5219	32.5678
ENSBTAG00000019729	ENSBTAT00000026292	-0.155358	0.281898	0.401399	16.3914	14.791	16.9905	18.1192	18.4671	17.0638
ENSBTAG00000044061	ENSBTAT00000061622	0.105097	0.142727	0.233952	7.16004	7.65589	7.43384	6.98803	6.90498	6.79355
ENSBTAG00000005729	ENSBTAT00000007531	0.459666	7.91802e-06	3.72202e-05	5.18358	5.04385	6.09958	4.0524	3.91678	3.90307
ENSBTAG00000003174	ENSBTAT00000004122	-0.202432	0.215152	0.325011	9.92746	10.6031	12.2003	12.6762	12.4797	12.5053
ENSBTAG00000002915	ENSBTAT00000003785	0.125544	0.107957	0.185803	9.74264	8.54331	9.49239	8.49952	8.89298	8.07075
ENSBTAG00000021420	ENSBTAT00000074043	-0.264828	0.440951	0.564647	0.207699	0.374332	0.253838	0.357024	0.313317	0.333949
ENSBTAG00000002625	ENSBTAT00000074847	0.371842	5.70391e-08	3.56121e-07	55.3054	49.7552	58.7883	44.2505	43.2831	39.0881
ENSBTAG00000001644	ENSBTAT00000002157	-0.0965792	0.569642	0.682425	5.40414	4.85135	5.45816	5.56455	5.67273	5.5643
ENSBTAG00000026604	ENSBTAT00000037876	-0.415144	0.0047699	0.0127548	10.6742	9.2509	8.33034	14.2802	12.0342	11.3623
ENSBTAG00000003764	ENSBTAT00000004897	0.1127	0.0240061	0.0523545	26.698	25.4595	24.1985	23.4526	24.0841	23.0816
ENSBTAG00000003764	ENSBTAT00000004897	0.1127	0.0240061	0.0523545	26.698	25.4595	24.1985	23.4526	24.0841	23.0816
ENSBTAG00000006672	ENSBTAT00000008774	-0.00559275	0.510118	0.630355	96.958	100.29	93.3636	103.263	100.857	87.6206
ENSBTAG00000003384	ENSBTAT00000004386	-0.353525	0.012198	0.0291944	3.01991	2.53484	3.1381	3.62031	4.13873	3.34762
ENSBTAG00000003384	ENSBTAT00000004386	-0.353525	0.012198	0.0291944	3.01991	2.53484	3.1381	3.62031	4.13873	3.34762
ENSBTAG00000021970	ENSBTAT00000066910	-0.383732	1.39487e-05	6.32214e-05	9.46909	9.54737	9.56933	12.735	12.8055	11.7557
ENSBTAG00000035370	ENSBTAT00000049877	-0.265882	0.047615	0.0941553	8.32905	8.33826	9.08245	11.3565	10.3901	9.21422
ENSBTAG00000000436	ENSBTAT00000000557	0.488777	0.00140368	0.00430344	0.84238	0.970758	0.885722	0.734842	0.600446	0.587998
ENSBTAG00000000243	ENSBTAT00000000304	-0.184477	0.107875	0.185714	33.3525	37.442	33.7703	40.5254	39.7407	38.5618
ENSBTAG00000020707	ENSBTAT00000037735	-0.0852479	0.720273	0.80482	6.27433	5.8889	5.97445	6.35764	6.69681	6.18727
ENSBTAG00000032163	ENSBTAT00000021934	0.125617	0.012996	0.0308135	29.8355	29.3996	31.7564	27.9445	28.0823	27.3771
ENSBTAG00000021107	ENSBTAT00000073234	-0.221799	0.0839356	0.15098	7.09551	6.09979	6.94492	8.18009	8.35024	6.95695
ENSBTAG00000001826	ENSBTAT00000077167	-0.14733	0.224596	0.335775	13.3157	12.9766	13.243	14.7829	15.5836	13.4195
ENSBTAG00000031917	ENSBTAT00000068799	-0.0692192	0.881215	0.92234	10.5292	9.67501	9.298	10.9289	10.7127	9.31068
ENSBTAG00000010047	ENSBTAT00000081961	-0.150869	0.265803	0.383742	5.7113	6.34064	6.28441	6.8992	7.04063	6.41788
ENSBTAG00000018464	ENSBTAT00000024571	-0.184498	0.582217	0.69279	0.619402	0.526127	0.589261	0.833679	0.558103	0.57967
ENSBTAG00000000817	ENSBTAT00000039096	1.87639	4.08522e-76	3.47272e-74	4.29947	4.28575	4.31865	1.18736	1.22262	1.10458
ENSBTAG00000007974	ENSBTAT00000010484	-0.0179888	0.649848	0.750837	15.9145	14.4269	15.2646	14.9593	15.8583	15.3607
ENSBTAG00000015166	ENSBTAT00000020180	0.0572817	0.381908	0.507078	1.7068	1.65642	1.76195	1.63962	1.90785	1.37819
ENSBTAG00000020079	ENSBTAT00000026753	-0.345875	2.6561e-05	0.000114536	16.2356	16.7702	16.8765	20.8567	21.2996	21.2402
ENSBTAG00000005557	ENSBTAT00000083796	0.482187	3.17901e-13	3.26385e-12	8.68786	8.45486	8.56439	5.87034	6.15055	6.38263
ENSBTAG00000003925	ENSBTAT00000005121	0.120945	0.0220657	0.0486631	17.4131	16.0876	16.9897	15.0397	16.1556	15.2349
ENSBTAG00000003884	ENSBTAT00000086653	0.0470702	0.274216	0.392947	6.68347	5.65612	6.52577	6.26894	6.3493	5.64155
ENSBTAG00000000892	ENSBTAT00000001184	-1.14804	2.2866e-05	9.96269e-05	0.591651	0.548228	0.351928	1.28404	1.2158	0.806201
ENSBTAG00000014534	ENSBTAT00000087016	-0.780844	9.31338e-14	1.00545e-12	931.989	1014.17	1262.53	1889.62	1758.65	1864.7
ENSBTAG00000005096	ENSBTAT00000006715	-0.635635	1.43846e-12	1.41932e-11	86.6567	82.1257	90.0152	131.966	125.182	144.926
ENSBTAG00000000053	ENSBTAT00000085924	2.02436	9.47435e-81	9.36343e-79	8.12994	6.7174	8.20917	1.89793	2.10491	1.66477
ENSBTAG00000024688	ENSBTAT00000068801	-0.363654	5.28025e-05	0.000217361	6.40349	6.34036	6.60068	8.28907	8.74143	7.85974
ENSBTAG00000024688	ENSBTAT00000068801	-0.363654	5.28025e-05	0.000217361	6.40349	6.34036	6.60068	8.28907	8.74143	7.85974
ENSBTAG00000052031	ENSBTAT00000074561	-0.231484	0.322552	0.445106	5.47141	6.09973	5.53845	7.69096	5.77965	6.61677
ENSBTAG00000043950	ENSBTAT00000068631	-1.34902	5.98571e-06	2.86691e-05	0.405501	0.211571	0.366498	0.924156	0.573388	1.00798
ENSBTAG00000000995	ENSBTAT00000001319	-0.170118	0.248214	0.364054	16.9224	13.9959	18.7149	18.6156	19.7924	17.4367
ENSBTAG00000026716	ENSBTAT00000079816	-0.248913	0.0397702	0.080844	13.6154	13.665	14.6392	16.157	19.2926	14.364
ENSBTAG00000034531	ENSBTAT00000038099	0.366707	7.31999e-09	5.04432e-08	46.4852	45.8549	49.8641	37.8826	37.9297	34.4743
ENSBTAG00000008121	ENSBTAT00000010680	-0.0839075	0.839423	0.893879	2.67216	2.70397	2.49059	2.80121	3.04897	2.48764
ENSBTAG00000008121	ENSBTAT00000010680	-0.0839075	0.839423	0.893879	2.67216	2.70397	2.49059	2.80121	3.04897	2.48764
ENSBTAG00000046503	ENSBTAT00000049978	-0.304633	0.00679527	0.0174654	6.3791	6.2109	7.083	7.70062	8.83465	7.76294
ENSBTAG00000046503	ENSBTAT00000052586	-0.304633	0.00679527	0.0174654	6.3791	6.2109	7.083	7.70062	8.83465	7.76294
ENSBTAG00000046503	ENSBTAT00000052586	-0.304633	0.00679527	0.0174654	6.3791	6.2109	7.083	7.70062	8.83465	7.76294
ENSBTAG00000001835	ENSBTAT00000002398	0.510789	1.05312e-10	8.84706e-10	388.43	375.649	421.985	300.229	294.807	237.389
ENSBTAG00000053374	ENSBTAT00000082564	-0.263405	0.0345212	0.0714768	11.8946	10.2773	12.4616	14.7165	15.0305	11.8239
ENSBTAG00000046282	ENSBTAT00000063492	1.86714	6.62306e-33	1.82977e-31	3.11559	3.35326	2.85347	0.850955	0.869375	0.835073
ENSBTAG00000009689	ENSBTAT00000012779	-0.0690674	0.87035	0.914832	67.5519	69.7054	72.9287	77.8435	75.102	67.5476
ENSBTAG00000033554	ENSBTAT00000047671	0	1	1	NA	NA	NA	NA	NA	NA
ENSBTAG00000005205	ENSBTAT00000076070	0.00245437	0.442685	0.565914	41.7381	38.4696	42.7865	41.643	43.8352	37.3069
ENSBTAG00000009243	ENSBTAT00000037995	-0.0572398	1	1	0.752784	0.690966	0.744119	0.717352	0.681437	0.87763
ENSBTAG00000016584	ENSBTAT00000022060	-0.078088	0.813725	0.875641	19.4368	16.2011	20.5519	19.5162	20.5297	19.269
ENSBTAG00000016584	ENSBTAT00000022060	-0.078088	0.813725	0.875641	19.4368	16.2011	20.5519	19.5162	20.5297	19.269
ENSBTAG00000016584	ENSBTAT00000084321	-0.078088	0.813725	0.875641	19.4368	16.2011	20.5519	19.5162	20.5297	19.269
ENSBTAG00000021398	ENSBTAT00000028523	0.14315	0.106474	0.183615	8.9234	7.62542	8.93429	8.33831	7.98721	6.75046
ENSBTAG00000017557	ENSBTAT00000023342	-0.220078	0.0810033	0.14642	6.69101	6.48647	7.47214	8.14495	8.36305	7.5446
ENSBTAG00000038931	ENSBTAT00000054366	-0.419677	0.0352775	0.0728194	5.80507	4.92483	4.84672	7.43085	7.80233	5.60254
ENSBTAG00000005026	ENSBTAT00000006614	-0.128167	0.439744	0.563458	13.0346	12.9828	14.1981	15.5446	15.1341	13.273
ENSBTAG00000011313	ENSBTAT00000015037	0.0562853	0.274806	0.393515	3.56878	3.01654	3.2176	3.22793	3.36451	2.8354
ENSBTAG00000011313	ENSBTAT00000015037	0.0562853	0.274806	0.393515	3.56878	3.01654	3.2176	3.22793	3.36451	2.8354
ENSBTAG00000003455	ENSBTAT00000078700	-0.425644	0.0957195	0.16856	3.07706	2.76331	1.34973	3.11841	3.42307	3.11606
ENSBTAG00000019110	ENSBTAT00000025441	0.721459	5.00189e-12	4.73544e-11	11.4212	12.5075	9.78151	7.05132	6.8102	6.58316
ENSBTAG00000016969	ENSBTAT00000022571	-0.484393	5.50613e-05	0.000225894	3.38937	3.32533	3.58233	4.81641	4.75344	4.83566
ENSBTAG00000021663	ENSBTAT00000070263	-0.964825	1.63039e-05	7.29712e-05	5.33111	2.74614	5.05133	9.28558	8.35463	7.9845
ENSBTAG00000046612	ENSBTAT00000064161	-0.0260277	0.733875	0.815969	5.2667	4.67812	5.04114	4.9483	5.71301	4.59746
ENSBTAG00000046612	ENSBTAT00000064161	-0.0260277	0.733875	0.815969	5.2667	4.67812	5.04114	4.9483	5.71301	4.59746
ENSBTAG00000046612	ENSBTAT00000064161	-0.0260277	0.733875	0.815969	5.2667	4.67812	5.04114	4.9483	5.71301	4.59746
ENSBTAG00000020829	ENSBTAT00000061187	0.578362	6.30685e-12	5.91559e-11	4.50382	4.31006	4.4692	3.21084	2.82923	2.85592
ENSBTAG00000015381	ENSBTAT00000046411	-0.582853	4.69975e-05	0.000195384	1.52429	1.44955	1.36038	2.06945	2.47824	1.94413
ENSBTAG00000005960	ENSBTAT00000007823	-0.792112	6.39393e-23	1.1618e-21	25.3081	26.8932	23.9083	43.6649	43.3993	44.7278
ENSBTAG00000006367	ENSBTAT00000008357	0.728666	1.0095e-24	1.99862e-23	1229.89	1363.1	1446.54	816.598	793.094	828.006
ENSBTAG00000015242	ENSBTAT00000020271	-0.364305	0.00345892	0.00960188	8.39148	9.04959	8.80455	11.8663	11.4764	10.4422
ENSBTAG00000017958	ENSBTAT00000085719	0.148243	0.00766978	0.0194197	7.34633	7.22752	7.47635	6.53182	6.90417	6.46098
ENSBTAG00000012544	ENSBTAT00000016650	-0.039122	0.823691	0.882884	21.8247	21.4358	22.8296	23.7578	21.9378	22.2112
ENSBTAG00000012544	ENSBTAT00000016650	-0.039122	0.823691	0.882884	21.8247	21.4358	22.8296	23.7578	21.9378	22.2112
ENSBTAG00000000245	ENSBTAT00000084104	0.070244	0.122196	0.205622	5.15539	5.74628	5.36304	4.89837	5.273	5.32039
ENSBTAG00000002964	ENSBTAT00000056227	1.15543	1.14778e-13	1.22175e-12	2.79844	3.67275	3.8689	1.42839	1.62529	1.58833
ENSBTAG00000011224	ENSBTAT00000014907	0.0162068	0.41266	0.536655	23.9547	24.8627	24.708	26.7487	24.9975	20.9578
ENSBTAG00000011224	ENSBTAT00000014907	0.0162068	0.41266	0.536655	23.9547	24.8627	24.708	26.7487	24.9975	20.9578
ENSBTAG00000051273	ENSBTAT00000069359	1.67283	1	1	0.030069	0.032028	0	0	0	0.019476
ENSBTAG00000001146	ENSBTAT00000001526	0.322007	2.13843e-07	1.24975e-06	10.7128	11.2525	10.2808	8.50983	8.70969	8.57585
ENSBTAG00000005376	ENSBTAT00000081154	0.268303	6.22268e-05	0.000252227	11.2872	10.3754	11.5641	8.82028	9.63223	9.13547
ENSBTAG00000008112	ENSBTAT00000010673	-0.048305	0.936131	0.960548	5.18285	4.90552	5.65942	5.69502	5.68204	4.90692
ENSBTAG00000008112	ENSBTAT00000010673	-0.048305	0.936131	0.960548	5.18285	4.90552	5.65942	5.69502	5.68204	4.90692
ENSBTAG00000016980	ENSBTAT00000022582	0.328158	4.47887e-06	2.17868e-05	10.1435	9.73387	10.1957	7.9588	8.77315	7.2229
ENSBTAG00000015076	ENSBTAT00000020062	0.000126317	0.527453	0.645757	6.81428	6.63063	7.12555	6.89864	7.63077	6.03924
ENSBTAG00000015076	ENSBTAT00000020062	0.000126317	0.527453	0.645757	6.81428	6.63063	7.12555	6.89864	7.63077	6.03924
ENSBTAG00000014790	ENSBTAT00000019675	0.342036	0.000891722	0.00286388	4.05017	3.94817	3.78225	3.45277	3.00715	2.83411
ENSBTAG00000013224	ENSBTAT00000017596	-0.232907	0.177602	0.279111	2.00017	1.98627	2.14427	2.56426	2.26521	2.37535
ENSBTAG00000009362	ENSBTAT00000052410	0.0752554	0.0712535	0.13186	22.4196	23.5138	21.6315	21.2194	22.2911	20.6203
ENSBTAG00000009362	ENSBTAT00000052410	0.0752554	0.0712535	0.13186	22.4196	23.5138	21.6315	21.2194	22.2911	20.6203
ENSBTAG00000009275	ENSBTAT00000012219	0.0781676	0.171756	0.27161	15.418	13.2224	15.2775	13.9901	13.6912	13.9204
ENSBTAG00000010047	ENSBTAT00000081961	-0.150869	0.265803	0.383742	5.7113	6.34064	6.28441	6.8992	7.04063	6.41788
ENSBTAG00000011509	ENSBTAT00000015295	0.177755	0.152991	0.247368	2.76288	2.09151	2.21487	2.08101	2.40844	1.76033
ENSBTAG00000010347	ENSBTAT00000067802	0.0150642	0.294653	0.414896	243.838	263.315	252.363	248.583	255.414	247.629
ENSBTAG00000005955	ENSBTAT00000007814	-0.0221584	0.873586	0.916985	1.23467	0.971298	1.2905	1.23334	0.969566	1.34769
ENSBTAG00000011179	ENSBTAT00000014845	-0.0600684	0.969345	0.98232	9.69983	8.70857	10.2466	10.7256	9.65553	9.49215
ENSBTAG00000052475	ENSBTAT00000067361	-1.55846	1	1	0.153667	0.102225	0.164103	0.411522	0.497154	0.328376
ENSBTAG00000052503	ENSBTAT00000085363	0	1	1	NA	NA	NA	NA	NA	NA
ENSBTAG00000016644	ENSBTAT00000022140	1.20859	2.09379e-33	5.91908e-32	5.83087	5.63377	6.59038	2.75826	2.59306	2.46095
ENSBTAG00000007840	ENSBTAT00000010315	1.07571	9.16559e-51	4.38649e-49	23.0373	22.2688	21.6163	10.6247	11.2883	9.83755
ENSBTAG00000007840	ENSBTAT00000010315	1.07571	9.16559e-51	4.38649e-49	23.0373	22.2688	21.6163	10.6247	11.2883	9.83755
ENSBTAG00000004028	ENSBTAT00000005265	0.222148	0.0011588	0.00362864	7.70554	7.08108	7.94113	6.82559	6.52874	6.1299
ENSBTAG00000004028	ENSBTAT00000005265	0.222148	0.0011588	0.00362864	7.70554	7.08108	7.94113	6.82559	6.52874	6.1299
ENSBTAG00000006823	ENSBTAT00000008967	1.85246	4.38972e-103	6.27782e-101	8.45067	7.48331	8.38446	2.12082	2.5368	2.07664
ENSBTAG00000006823	ENSBTAT00000008967	1.85246	4.38972e-103	6.27782e-101	8.45067	7.48331	8.38446	2.12082	2.5368	2.07664
ENSBTAG00000000371	ENSBTAT00000000481	-0.0339781	0.764367	0.838445	18.873	20.5702	19.3517	20.9524	19.7969	19.4468
ENSBTAG00000033983	ENSBTAT00000048212	-0.199597	0.0373792	0.0765338	32.9819	33.079	34.161	38.0733	39.7282	37.2911
ENSBTAG00000005213	ENSBTAT00000006867	-0.649976	3.63896e-08	2.3245e-07	6.45725	6.08062	7.5848	10.7249	11.485	9.36542
ENSBTAG00000012599	ENSBTAT00000016728	0.230245	0.00308832	0.00868415	18.6814	21.7789	18.5821	15.7214	16.2111	18.4006
ENSBTAG00000045628	ENSBTAT00000066309	-0.0420947	0.974373	0.985315	2.48285	3.17774	2.92423	3.05737	2.71606	3.06557
ENSBTAG00000000218	ENSBTAT00000000265	0.184773	0.00344636	0.00957139	11.8711	11.9478	12.1578	10.1958	10.8804	10.5757
ENSBTAG00000005564	ENSBTAT00000047844	-0.0635332	0.956148	0.973445	8.10605	9.69326	8.11944	9.43001	9.36574	8.28991
ENSBTAG00000008378	ENSBTAT00000011028	-0.134315	0.371922	0.496822	14.8067	12.6545	15.2278	15.8176	16.8724	14.1642
ENSBTAG00000008378	ENSBTAT00000011028	-0.134315	0.371922	0.496822	14.8067	12.6545	15.2278	15.8176	16.8724	14.1642
ENSBTAG00000012681	ENSBTAT00000070596	0.072361	0.536071	0.653317	0.682163	0.527789	0.591294	0.535493	0.599131	0.578505
ENSBTAG00000001405	ENSBTAT00000001844	0.757514	6.78639e-27	1.47051e-25	17.6125	15.7218	17.4012	10.1412	10.1368	9.7328
ENSBTAG00000033344	ENSBTAT00000007964	0.132817	0.313052	0.43486	5.28799	5.75935	5.98791	4.30227	5.35086	5.88385
ENSBTAG00000010665	ENSBTAT00000070110	1.10994	1.59208e-10	1.31387e-09	4.77681	5.84776	5.05773	2.38971	1.86434	3.01179
ENSBTAG00000002712	ENSBTAT00000003513	-0.29795	0.130162	0.216939	9.6947	9.31587	11.0503	11.7147	10.1508	15.0912
ENSBTAG00000002709	ENSBTAT00000003509	0.00752932	0.39957	0.524645	30.2727	28.5352	28.6143	27.473	29.4576	30.0364
ENSBTAG00000012725	ENSBTAT00000083992	-0.0218017	0.834032	0.889688	1.61004	1.6279	1.4777	1.57963	1.4631	1.74472
ENSBTAG00000012724	ENSBTAT00000077205	-0.433749	4.1288e-05	0.000173487	13.0582	11.0751	11.2706	15.185	16.1824	16.454
ENSBTAG00000012723	ENSBTAT00000080337	-0.53181	4.67971e-05	0.000194617	3.55052	2.99247	3.35004	4.82695	4.70978	4.76603
ENSBTAG00000038333	ENSBTAT00000082396	0.174855	0.00632679	0.0164089	10.5622	10.5507	11.111	9.42939	9.24143	9.87498
ENSBTAG00000019077	ENSBTAT00000025397	-0.470121	6.05103e-09	4.21285e-08	57.871	60.485	58.2293	84.3634	79.4411	80.806
ENSBTAG00000044207	ENSBTAT00000061077	0.0474592	0.199527	0.305974	18.7751	17.504	18.843	17.9507	19.1202	16.2675
ENSBTAG00000020421	ENSBTAT00000027214	-0.129065	0.35227	0.476447	40.6109	37.0474	41.1241	45.4969	45.4106	38.9912
ENSBTAG00000011396	ENSBTAT00000001668	-0.024941	0.67398	0.770879	118.03	113.045	117.638	117.817	112.682	124.296
ENSBTAG00000016236	ENSBTAT00000021604	0.168072	0.0276987	0.0591127	4.39617	4.46883	4.54121	4.24284	4.20406	3.48505
ENSBTAG00000006413	ENSBTAT00000008409	0.0148794	0.409342	0.533686	20.1503	18.6751	19.2333	18.4326	19.2054	19.8251
ENSBTAG00000032518	ENSBTAT00000046117	-0.227729	0.0986193	0.172571	6.03589	5.57434	6.05673	6.82434	7.91948	5.94401
ENSBTAG00000021870	ENSBTAT00000029157	-0.352717	0.00203369	0.00600621	15.9622	13.9927	17.8593	20.6803	20.4118	19.9649
ENSBTAG00000002006	ENSBTAT00000002600	-0.455307	2.27219e-08	1.48819e-07	1041.55	1166.24	1145.18	1553.5	1531.18	1512.49
ENSBTAG00000032340	ENSBTAT00000045876	-1.68357	5.75059e-43	2.26962e-41	4.96288	3.66619	4.47359	13.9077	14.4028	13.7781
ENSBTAG00000004421	ENSBTAT00000005795	0.0505233	0.273994	0.392675	9.02538	8.82357	9.89916	8.77814	8.93384	9.08122
ENSBTAG00000053398	ENSBTAT00000068526	-3.39218	6.01544e-148	2.08925e-145	0.381377	0.436949	0.358224	4.20442	4.4973	3.65091
ENSBTAG00000053398	ENSBTAT00000068526	-3.39218	6.01544e-148	2.08925e-145	0.381377	0.436949	0.358224	4.20442	4.4973	3.65091
ENSBTAG00000013480	ENSBTAT00000017926	-0.0812934	0.863177	0.909411	6.30079	7.34714	7.58014	8.12065	6.49569	7.84224
ENSBTAG00000001671	ENSBTAT00000002191	-0.0434334	0.883468	0.924141	14.0922	13.7627	14.3116	15.4529	15.838	12.1644
ENSBTAG00000015138	ENSBTAT00000020143	0.0962619	0.0485322	0.0956326	6.51703	5.91467	6.60945	5.88412	6.37256	5.55544
ENSBTAG00000053146	ENSBTAT00000072174	-2.22879	1	1	0.149801	0	0.03811	0.468029	0	0.412787
ENSBTAG00000015138	ENSBTAT00000020143	0.0962619	0.0485322	0.0956326	6.51703	5.91467	6.60945	5.88412	6.37256	5.55544
ENSBTAG00000005661	ENSBTAT00000007438	-0.150788	0.407435	0.532087	17.6565	16.2094	16.2328	18.9844	21.7699	14.864
ENSBTAG00000048958	ENSBTAT00000085210	0.153814	0.0188974	0.0426112	2.56728	2.22614	2.50581	2.05274	2.28541	2.22291
ENSBTAG00000004926	ENSBTAT00000006480	-1.19718	1.81835e-05	8.06417e-05	0.482411	0.392466	0.685105	1.39455	1.33093	0.851425
ENSBTAG00000033891	ENSBTAT00000048092	0.0400276	0.248335	0.364145	26.6185	26.976	28.8824	28.6334	25.4719	26.1148
ENSBTAG00000045980	ENSBTAT00000063023	0.0727937	0.140155	0.230638	76.0639	80.6242	77.0101	71.1225	70.0639	81.0127
ENSBTAG00000014312	ENSBTAT00000019032	0.25101	0.203195	0.310207	0.311293	0.291036	0.281109	0.209822	0.297186	0.235352
ENSBTAG00000031707	ENSBTAT00000052708	0.342041	4.73825e-08	2.98746e-07	21.1404	22.2999	22.8318	17.1391	18.4902	16.6544
ENSBTAG00000006703	ENSBTAT00000008808	-0.190888	0.423196	0.546982	1.09011	1.28352	1.15911	1.46144	1.28507	1.286
ENSBTAG00000015806	ENSBTAT00000044965	-0.30059	0.00159935	0.00484832	32.2347	29.0848	33.4545	38.2707	37.9155	40.542
ENSBTAG00000015806	ENSBTAT00000044965	-0.30059	0.00159935	0.00484832	32.2347	29.0848	33.4545	38.2707	37.9155	40.542
ENSBTAG00000016823	ENSBTAT00000022379	-0.206445	0.0922019	0.163506	5.77476	5.51907	5.86503	6.37692	6.94162	6.48007
ENSBTAG00000053677	ENSBTAT00000087308	-0.0245402	0.830499	0.887521	1.93115	1.5794	2.03917	1.69409	2.02803	1.92281
ENSBTAG00000015904	ENSBTAT00000021144	0.189231	0.159832	0.256241	2.07207	2.32941	1.66125	1.87218	1.50729	1.93798
ENSBTAG00000005328	ENSBTAT00000007009	0.409452	1.9004e-05	8.40962e-05	7.85341	6.21794	7.81899	5.6265	6.0091	4.84584
ENSBTAG00000005328	ENSBTAT00000007009	0.409452	1.9004e-05	8.40962e-05	7.85341	6.21794	7.81899	5.6265	6.0091	4.84584
ENSBTAG00000011319	ENSBTAT00000077935	-0.12877	0.311653	0.43366	24.9577	25.1598	26.6519	29.3701	27.072	27.4945
ENSBTAG00000011319	ENSBTAT00000015043	-0.12877	0.311653	0.43366	24.9577	25.1598	26.6519	29.3701	27.072	27.4945
ENSBTAG00000005481	ENSBTAT00000075105	-0.00135658	0.500451	0.621716	33.6849	32.5678	33.1985	34.1835	36.4763	28.8848
ENSBTAG00000000271	ENSBTAT00000000337	-0.232799	0.276444	0.395301	2.0717	2.57346	2.34261	2.87171	2.69388	2.64581
ENSBTAG00000000565	ENSBTAT00000000738	-0.260687	0.0255842	0.0553862	3.43432	3.34561	3.59473	4.22356	4.49838	3.70741
ENSBTAG00000013793	ENSBTAT00000080290	0.0892193	0.0464133	0.0920993	20.08	19.2745	21.3718	19.0571	20.1826	17.8449
ENSBTAG00000013793	ENSBTAT00000080290	0.0892193	0.0464133	0.0920993	20.08	19.2745	21.3718	19.0571	20.1826	17.8449
ENSBTAG00000005848	ENSBTAT00000087201	-0.0529635	0.98993	0.995828	0.655171	0.525298	0.565847	0.598067	0.577006	0.636545
ENSBTAG00000009151	ENSBTAT00000012057	-0.00309823	0.604395	0.712266	7.89711	8.24643	7.5476	7.72732	8.02127	7.99347
ENSBTAG00000012741	ENSBTAT00000083672	0.324999	1.23772e-07	7.41897e-07	80.496	83.2835	82.0087	68.0347	67.7461	60.4317
ENSBTAG00000012741	ENSBTAT00000083672	0.324999	1.23772e-07	7.41897e-07	80.496	83.2835	82.0087	68.0347	67.7461	60.4317
ENSBTAG00000024958	ENSBTAT00000065691	-0.085284	0.698297	0.789701	8.62205	7.87286	8.40392	8.97072	8.84679	8.59757
ENSBTAG00000044748	ENSBTAT00000062181	0.364179	1	1	0.112345	0.612284	0.122813	0.118642	0.190235	0.34951
ENSBTAG00000006489	ENSBTAT00000063531	-0.337135	4.06122e-05	0.000170883	21.2446	21.4757	22.6079	28.1206	27.1674	27.2376
ENSBTAG00000013830	ENSBTAT00000018400	-0.0705124	0.861409	0.908257	12.1579	11.364	11.8675	13.0048	12.2876	11.8696
ENSBTAG00000010472	ENSBTAT00000056282	0.144163	0.130143	0.216939	3.22091	3.04076	3.51861	3.08451	2.75962	3.00609
ENSBTAG00000022801	ENSBTAT00000076865	-0.123814	0.518453	0.638259	5.6425	4.83975	5.55884	5.70188	6.25093	5.52573
ENSBTAG00000013425	ENSBTAT00000017862	-0.129551	0.360953	0.485209	15.1575	17.4963	16.108	18.395	18.1013	16.8469
ENSBTAG00000046553	ENSBTAT00000065830	0.0629101	0.112539	0.1923	17.3917	16.4064	16.6889	16.6207	16.845	14.867
ENSBTAG00000002278	ENSBTAT00000077684	-0.473065	2.47982e-09	1.79647e-08	258.532	273.543	252.024	356.588	361.675	370.11
ENSBTAG00000008771	ENSBTAT00000071571	-1.06778	7.33178e-20	1.13971e-18	4.62581	5.41734	5.69765	11.2086	10.4714	11.316
ENSBTAG00000004558	ENSBTAT00000067582	0.0773098	0.499148	0.62054	2.60262	2.0587	3.28488	2.60179	2.64008	2.28972
ENSBTAG00000017141	ENSBTAT00000022778	0.167425	0.184431	0.287061	4.57826	3.35415	5.1359	4.1968	4.17931	3.26031
ENSBTAG00000044921	ENSBTAT00000062354	-1.14145	1	1	0	0	0.22728	0.152725	0	0.348662
ENSBTAG00000001468	ENSBTAT00000001925	-0.362847	6.55219e-05	0.000264174	18.5791	18.3731	19.0834	25.1673	25.4174	21.475
ENSBTAG00000001468	ENSBTAT00000077964	-0.362847	6.55219e-05	0.000264174	18.5791	18.3731	19.0834	25.1673	25.4174	21.475
ENSBTAG00000021988	ENSBTAT00000029320	-0.0315186	0.806136	0.870206	7.92164	7.10869	7.84231	8.15164	8.08239	7.1438
ENSBTAG00000010795	ENSBTAT00000084086	0.212029	0.0417941	0.0842536	3.00203	2.82101	3.36714	2.45893	3.15772	2.31744
ENSBTAG00000017713	ENSBTAT00000043690	0.0224382	0.323999	0.446647	38.9483	35.2056	39.3193	39.1814	39.2325	33.3081
ENSBTAG00000017713	ENSBTAT00000043690	0.0224382	0.323999	0.446647	38.9483	35.2056	39.3193	39.1814	39.2325	33.3081
ENSBTAG00000017713	ENSBTAT00000043690	0.0224382	0.323999	0.446647	38.9483	35.2056	39.3193	39.1814	39.2325	33.3081
ENSBTAG00000013043	ENSBTAT00000017337	0.0974089	0.235137	0.348448	5.97966	4.5777	6.35595	5.24983	5.40961	5.14961
ENSBTAG00000018898	ENSBTAT00000025155	0.253481	0.00158248	0.00480195	8.05478	7.1773	6.96117	6.31986	6.95068	5.34671
ENSBTAG00000019421	ENSBTAT00000025871	1.28136	7.47668e-52	3.67961e-50	25.0218	28.1481	23.7763	10.6956	10.7294	10.2313
ENSBTAG00000005984	ENSBTAT00000075877	-0.334933	0.00276984	0.00789824	3.22772	3.53919	3.69138	4.28011	4.69041	4.22071
ENSBTAG00000014096	ENSBTAT00000018737	0.00367029	0.649192	0.75017	3.16927	2.63118	2.77902	3.04061	3.13595	2.38112
ENSBTAG00000014096	ENSBTAT00000018737	0.00367029	0.649192	0.75017	3.16927	2.63118	2.77902	3.04061	3.13595	2.38112
ENSBTAG00000014096	ENSBTAT00000018737	0.00367029	0.649192	0.75017	3.16927	2.63118	2.77902	3.04061	3.13595	2.38112
ENSBTAG00000014096	ENSBTAT00000018737	0.00367029	0.649192	0.75017	3.16927	2.63118	2.77902	3.04061	3.13595	2.38112
ENSBTAG00000018127	ENSBTAT00000024128	0.292562	1.24876e-06	6.57804e-06	18.1838	17.8646	17.8397	14.3265	15.1652	14.5053
ENSBTAG00000030801	ENSBTAT00000043532	-0.173408	0.22317	0.334301	17.3747	17.335	19.9876	22.3876	20.6501	18.6456
ENSBTAG00000020937	ENSBTAT00000027888	-0.0110171	0.750058	0.827717	2.44352	2.28863	1.9626	2.38308	2.43192	1.93106
ENSBTAG00000017200	ENSBTAT00000022858	0.00205778	0.762997	0.837547	1.61547	1.63639	1.37234	1.61619	1.91203	1.08938
ENSBTAG00000025450	ENSBTAT00000029285	-0.100329	0.689978	0.783062	0.967885	0.887488	1.07044	0.950314	1.20206	0.984151
ENSBTAG00000040551	ENSBTAT00000051891	-0.0220456	0.694428	0.78679	10.2324	8.90419	9.70215	9.61581	10.7113	8.95572
ENSBTAG00000019819	ENSBTAT00000026406	0.16274	0.0111098	0.0269456	12.3805	12.9009	13.7645	12.0333	12.3335	10.5139
ENSBTAG00000019819	ENSBTAT00000084921	0.16274	0.0111098	0.0269456	12.3805	12.9009	13.7645	12.0333	12.3335	10.5139
ENSBTAG00000011767	ENSBTAT00000015625	0.376931	6.5789e-05	0.000264987	6.01704	5.26127	6.10272	4.49307	5.20325	3.68836
ENSBTAG00000016311	ENSBTAT00000071779	-0.00529479	0.563631	0.677282	33.1094	30.3969	32.8767	33.5596	35.5372	27.6407
ENSBTAG00000009998	ENSBTAT00000013186	-0.0636802	0.922211	0.950117	21.633	23.5984	22.3117	22.3739	23.503	24.7143
ENSBTAG00000017811	ENSBTAT00000023676	-0.0816465	0.718125	0.803737	17.854	17.0851	18.5428	18.8423	19.245	18.5087
ENSBTAG00000025385	ENSBTAT00000009155	-0.401307	6.58728e-06	3.13896e-05	782.025	806.916	779.379	1093.41	955.921	1078.51
ENSBTAG00000025458	ENSBTAT00000035798	0.998402	1	1	0.0230923	0	0.0503221	0.0367479	0	0
ENSBTAG00000011757	ENSBTAT00000015615	0.14073	0.0127591	0.0303226	21.5691	20.7923	21.7678	21.0323	19.3217	17.815
ENSBTAG00000002842	ENSBTAT00000003681	0.570014	1	1	0.101741	0.20649	0.131688	0.0336344	0.13664	0.12606
ENSBTAG00000030557	ENSBTAT00000043138	0.356042	1.62765e-05	7.28755e-05	10.2554	9.25363	10.2167	8.49333	7.64387	7.08771
ENSBTAG00000021956	ENSBTAT00000029272	-0.245146	0.224086	0.33526	5.7418	6.10569	5.3591	5.81308	7.44355	7.13684
ENSBTAG00000049624	ENSBTAT00000072493	inf	1	1	0	0.1957	0	0	0	0
ENSBTAG00000003084	ENSBTAT00000004016	0.241439	0.000403353	0.00140653	7.58583	6.78638	7.20739	6.15996	6.37079	5.72345
ENSBTAG00000008735	ENSBTAT00000043072	0.648067	2.24893e-11	2.01311e-10	2.94722	3.21021	2.97712	1.92053	1.96633	1.94222
ENSBTAG00000008133	ENSBTAT00000010693	-0.209155	0.171811	0.271662	7.79028	6.25728	7.61331	8.0683	7.9592	9.01268
ENSBTAG00000012737	ENSBTAT00000016931	-0.372111	0.201123	0.308071	0.656459	1.16104	1.02155	1.2764	0.980147	1.41788
ENSBTAG00000049895	ENSBTAT00000070049	-0.690076	1	1	0.470064	0.813132	1.10265	1.06644	1.20188	1.58092
ENSBTAG00000030456	ENSBTAT00000081367	0.159698	0.190783	0.295208	2.08439	2.10055	2.91326	2.14487	2.19309	2.01644
ENSBTAG00000030453	ENSBTAT00000086942	-0.137525	0.265446	0.383317	22.4025	24.0609	23.4882	25.8952	24.7276	26.3251
ENSBTAG00000015385	ENSBTAT00000086410	-0.0398138	0.848288	0.899036	8.6707	8.71567	8.99703	9.22916	9.63484	8.25763
ENSBTAG00000012803	ENSBTAT00000017007	-0.215792	0.0482709	0.0952102	34.8737	32.9555	34.1185	41.1044	36.8689	40.4229
ENSBTAG00000018852	ENSBTAT00000025099	-0.391196	5.30277e-06	2.55087e-05	16.6583	16.1297	17.3031	22.446	23.1779	20.0695
ENSBTAG00000018852	ENSBTAT00000025099	-0.391196	5.30277e-06	2.55087e-05	16.6583	16.1297	17.3031	22.446	23.1779	20.0695
ENSBTAG00000001898	ENSBTAT00000002468	0.581792	3.70995e-10	2.94182e-09	16.0912	16.5159	17.55	12.1762	11.9993	9.33615
ENSBTAG00000008699	ENSBTAT00000011464	0.121306	0.114718	0.195337	6.67203	6.89652	7.98789	6.36856	7.75163	5.69785
ENSBTAG00000002357	ENSBTAT00000003042	-0.0486727	0.945426	0.965896	6.4849	6.11804	6.04427	7.34595	6.47574	5.46535
ENSBTAG00000035030	ENSBTAT00000049503	-0.164458	0.126867	0.212219	109.616	104.185	113.64	125.083	126.925	114.969
ENSBTAG00000050091	ENSBTAT00000076540	0.282459	0.00360648	0.00996145	6.59385	5.06589	5.02432	4.74974	4.85242	4.1153
ENSBTAG00000000898	ENSBTAT00000001191	-0.0937963	0.700866	0.791282	6.45462	7.02701	7.32533	7.44442	7.78196	6.97829
ENSBTAG00000005016	ENSBTAT00000006605	-0.227839	0.017057	0.0390344	29.928	29.2503	30.0023	36.6364	35.5809	32.2204
ENSBTAG00000007374	ENSBTAT00000009698	-0.561946	2.63036e-13	2.71893e-12	27.0801	27.7806	26.4055	39.8639	41.3781	38.7281
ENSBTAG00000025853	ENSBTAT00000017647	-0.0608691	0.965845	0.980362	13.7024	12.7025	13.9715	14.4563	15.4201	12.24
ENSBTAG00000046956	ENSBTAT00000063138	-0.125902	0.489985	0.611903	14.132	14.4274	14.4572	14.8599	16.8365	15.2429
ENSBTAG00000015732	ENSBTAT00000020886	-0.233289	0.0256172	0.0554195	44.8197	42.107	47.1146	57.2959	51.7046	48.5666
ENSBTAG00000011540	ENSBTAT00000015332	-0.0822684	0.756558	0.832131	22.7839	22.5032	23.0809	25.1669	25.6069	21.6061
ENSBTAG00000039658	ENSBTAT00000054198	0.198129	0.0452573	0.0902474	4.34304	3.22664	3.74449	3.20951	3.37891	3.27392
ENSBTAG00000012352	ENSBTAT00000086668	-0.00174477	0.787923	0.857015	2.96534	5.11671	5.15134	3.24398	5.2639	4.74153
ENSBTAG00000015158	ENSBTAT00000020164	-0.260326	0.0538147	0.104484	4.81691	4.33906	4.69225	5.20561	5.98667	5.39442
ENSBTAG00000017095	ENSBTAT00000022733	-0.298139	0.00655817	0.0169583	6.13151	5.39063	6.45433	7.74323	7.66183	6.69804
ENSBTAG00000005210	ENSBTAT00000006862	0.250699	0.115981	0.197087	3.7878	2.83476	4.25564	3.03045	2.5555	3.55705
ENSBTAG00000050356	ENSBTAT00000078044	0.0246287	1	1	0.550664	0.19575	0.416913	0.493078	0.354209	0.296349
ENSBTAG00000025822	ENSBTAT00000036523	-0.706638	7.13963e-07	3.91295e-06	9.53322	10.0623	8.38188	14.1458	14.5659	16.9474
ENSBTAG00000013982	ENSBTAT00000074550	-0.356103	6.82526e-05	0.000274093	19.416	20.0527	19.9097	26.8064	26.1803	23.0154
ENSBTAG00000003915	ENSBTAT00000084463	0.0484779	0.141089	0.231861	62.5279	67.34	66.9312	62.1031	63.5304	64.6625
ENSBTAG00000007433	ENSBTAT00000009780	-0.126739	0.402209	0.527086	4.20007	3.70217	4.23719	4.3761	4.73927	4.13874
ENSBTAG00000007433	ENSBTAT00000009780	-0.126739	0.402209	0.527086	4.20007	3.70217	4.23719	4.3761	4.73927	4.13874
ENSBTAG00000007433	ENSBTAT00000070388	-0.126739	0.402209	0.527086	4.20007	3.70217	4.23719	4.3761	4.73927	4.13874
ENSBTAG00000001578	ENSBTAT00000002065	0.059786	0.104522	0.18094	31.6067	30.533	33.5545	30.4498	31.7946	29.5653
ENSBTAG00000010666	ENSBTAT00000014108	-0.327262	0.000618696	0.00206221	14.4279	15.1419	13.5712	17.4749	17.9761	18.675
ENSBTAG00000006884	ENSBTAT00000021887	-0.188146	0.070698	0.130969	19.6177	17.6902	20.1722	22.4509	21.9109	21.1251
ENSBTAG00000047027	ENSBTAT00000063675	-0.0801705	0.830485	0.887521	25.1487	26.7991	27.7013	27.8269	26.5191	29.8545
ENSBTAG00000014824	ENSBTAT00000019744	0.366941	2.05172e-09	1.49794e-08	272.04	270.081	256.001	202.412	201.165	215.306
ENSBTAG00000014820	ENSBTAT00000019736	-0.290594	0.00276168	0.00787865	34.0933	37.7638	33.5896	45.2591	42.128	41.5894
ENSBTAG00000015146	ENSBTAT00000020149	0.101755	0.0282498	0.060141	32.9805	32.9274	35.0523	32.9918	31.0326	30.0603
ENSBTAG00000013401	ENSBTAT00000063701	0.173406	0.00202472	0.00598655	15.0705	15.5538	14.5429	12.9061	13.2527	13.8931
ENSBTAG00000006416	ENSBTAT00000008411	-0.156063	0.167877	0.266655	57.3643	54.3775	55.5312	62.1996	64.3012	59.882
ENSBTAG00000025642	ENSBTAT00000036191	-0.1809	0.406595	0.531543	0.447477	0.344252	0.431933	0.472874	0.444349	0.469909
ENSBTAG00000020100	ENSBTAT00000035838	-0.712859	0.000701164	0.00230112	5.37753	4.41588	5.42328	9.80673	10.2103	4.9239
ENSBTAG00000012712	ENSBTAT00000016895	0.329342	3.12982e-07	1.79802e-06	21.1655	20.7821	22.0463	17.208	18.2071	15.5176
ENSBTAG00000040206	ENSBTAT00000061230	0.0983116	0.315419	0.437898	3.22959	2.93154	3.71855	3.09108	3.4732	2.66459
ENSBTAG00000040206	ENSBTAT00000061230	0.0983116	0.315419	0.437898	3.22959	2.93154	3.71855	3.09108	3.4732	2.66459
ENSBTAG00000003172	ENSBTAT00000072366	-0.161836	0.233903	0.347043	9.51127	9.68955	8.73935	10.0068	10.657	10.5931
ENSBTAG00000012180	ENSBTAT00000016157	0.206234	0.0431533	0.0866632	3.70679	3.01999	2.83356	2.8827	2.78287	2.62131
ENSBTAG00000013774	ENSBTAT00000018299	0.619576	1.17451e-09	8.74839e-09	4.48869	4.34201	3.75583	2.51497	2.76356	2.91357
ENSBTAG00000010778	ENSBTAT00000074751	0.141097	0.0655116	0.123237	7.68096	6.61723	8.30933	6.46758	7.68341	6.35018
ENSBTAG00000006792	ENSBTAT00000008933	-0.431887	2.47462e-06	1.25496e-05	6.3528	6.36265	6.17127	8.69958	8.87766	7.9009
ENSBTAG00000004079	ENSBTAT00000005329	1.70765	8.01406e-115	1.49875e-112	143.418	128.155	151.062	43.2892	45.3125	40.7912
ENSBTAG00000031981	ENSBTAT00000045347	0.100968	0.133656	0.221866	9.01117	7.98494	8.42177	8.1756	8.15423	7.36997
ENSBTAG00000025564	ENSBTAT00000020267	-0.539133	1.50545e-07	8.95315e-07	125.01	138.698	119.548	186.255	169.111	201.542
ENSBTAG00000004930	ENSBTAT00000044951	0.23104	0.037704	0.077108	2.12638	2.21029	2.27348	1.90979	1.99117	1.73103
ENSBTAG00000004934	ENSBTAT00000066864	-0.252036	0.0232166	0.0509057	11.7874	10.621	11.9105	14.8637	13.8896	12.1167
ENSBTAG00000004934	ENSBTAT00000066864	-0.252036	0.0232166	0.0509057	11.7874	10.621	11.9105	14.8637	13.8896	12.1167
ENSBTAG00000005550	ENSBTAT00000007299	-0.103846	0.613053	0.719748	4.65802	4.83957	4.82372	5.33369	5.25609	4.80041
ENSBTAG00000004780	ENSBTAT00000036046	1.00062	8.73946e-05	0.000344366	0.550402	0.74785	0.649964	0.324889	0.404946	0.243856
ENSBTAG00000020281	ENSBTAT00000068471	0.116047	0.0196206	0.0439566	8.02035	7.81789	8.4242	7.73716	7.68278	6.96731
ENSBTAG00000011494	ENSBTAT00000080533	-0.479606	2.32421e-08	1.51817e-07	32.2454	35.8479	31.5998	47.1316	46.2179	45.6589
ENSBTAG00000008411	ENSBTAT00000068788	0.377394	9.51283e-09	6.49286e-08	16.5426	16.751	17.0513	12.358	12.8724	13.5265
ENSBTAG00000011146	ENSBTAT00000014802	-0.121888	0.46909	0.591951	9.5369	8.99201	9.502	10.6998	11.0981	8.70412
ENSBTAG00000017373	ENSBTAT00000023098	-0.140098	0.417388	0.541489	6.39533	6.51944	6.22953	7.08457	7.33098	6.68109
ENSBTAG00000017373	ENSBTAT00000023098	-0.140098	0.417388	0.541489	6.39533	6.51944	6.22953	7.08457	7.33098	6.68109
ENSBTAG00000014181	ENSBTAT00000018858	-0.107812	0.533679	0.651477	9.23778	9.21442	8.49405	9.75527	10.3132	8.96863
ENSBTAG00000012391	ENSBTAT00000016444	0.188642	0.0212509	0.0470968	6.3394	5.86844	6.71237	5.34081	5.96296	5.29741
ENSBTAG00000012391	ENSBTAT00000016444	0.188642	0.0212509	0.0470968	6.3394	5.86844	6.71237	5.34081	5.96296	5.29741
ENSBTAG00000040384	ENSBTAT00000002841	-0.198745	0.0943865	0.166671	18.5911	17.1044	16.4773	20.4641	20.4009	19.0137
ENSBTAG00000002586	ENSBTAT00000035927	-0.148876	0.227421	0.338956	74.6302	85.5308	78.8467	91.3534	86.8077	86.828
ENSBTAG00000005865	ENSBTAT00000007709	-0.344527	0.000189993	0.000708887	55.8556	53.8987	59.094	74.8881	75.1586	64.346
ENSBTAG00000051898	ENSBTAT00000073054	-1.59664	1.27452e-61	8.11158e-60	13.9449	14.6647	14.3921	49.1335	43.5463	37.3744
ENSBTAG00000004011	ENSBTAT00000005236	-0.202911	0.17735	0.278825	4.94517	5.38346	5.37551	5.92604	6.21709	5.93264
ENSBTAG00000022583	ENSBTAT00000015489	-0.00900854	1	1	0.203553	0.069863	0.129376	0.120832	0.112938	0.171545
ENSBTAG00000027764	ENSBTAT00000022914	-0.324778	0.0014033	0.00430335	22.3046	20.1418	23.8114	28.9637	28.0461	25.9763
ENSBTAG00000016800	ENSBTAT00000022349	0.168884	0.276705	0.395426	0.538568	0.743384	0.778627	0.474937	0.656215	0.701795
ENSBTAG00000003835	ENSBTAT00000004992	1.36628	2.33472e-17	3.15343e-16	2.6891	3.02508	2.75089	1.10576	1.15292	1.02485
ENSBTAG00000010795	ENSBTAT00000084086	0.212029	0.0417941	0.0842536	3.00203	2.82101	3.36714	2.45893	3.15772	2.31744
ENSBTAG00000013042	ENSBTAT00000017336	0.050754	0.258209	0.375229	27.2477	24.6218	28.0334	26.0671	29.3216	21.7521
ENSBTAG00000020880	ENSBTAT00000027817	-1.52376	1.51972e-68	1.04964e-66	5.65414	5.56012	5.64547	16.2616	15.8355	16.3813
ENSBTAG00000049091	ENSBTAT00000067806	-0.557721	2.13947e-06	1.09413e-05	3.63943	3.12917	3.2574	4.72474	5.52711	4.50585
ENSBTAG00000011796	ENSBTAT00000081967	-0.0328093	0.822136	0.881458	13.6408	11.5099	14.1509	14.3617	14.0574	11.7864
ENSBTAG00000016713	ENSBTAT00000022215	0.125496	0.308933	0.430763	4.19358	5.09225	4.68499	3.87436	3.78069	5.15185
ENSBTAG00000008815	ENSBTAT00000011607	-0.145388	0.506624	0.627332	6.3038	4.97328	5.89982	5.99389	5.92964	7.0746
ENSBTAG00000014334	ENSBTAT00000043260	0.440265	1.49016e-11	1.3579e-10	6.1826	5.82273	5.72589	4.28134	4.41129	4.37527
ENSBTAG00000025434	ENSBTAT00000035742	-0.0400887	0.8281	0.885969	26.7786	28.4337	26.19	29.6346	28.3717	25.6896
ENSBTAG00000025434	ENSBTAT00000035742	-0.0400887	0.8281	0.885969	26.7786	28.4337	26.19	29.6346	28.3717	25.6896
ENSBTAG00000007586	ENSBTAT00000020908	-0.0896602	0.718704	0.804102	18.1698	16.7821	18.8229	19.5128	19.8249	17.8851
ENSBTAG00000038377	ENSBTAT00000055268	1.45805	1	1	0.30793	0.132669	0.29333	0.067045	0.095189	0.104905
ENSBTAG00000011041	ENSBTAT00000064501	0.141533	0.00807767	0.0203423	13.2237	13.424	12.8608	11.4477	12.1878	12.1812
ENSBTAG00000009271	ENSBTAT00000012212	0.0451758	0.468215	0.591214	3.96642	2.94911	3.28092	3.0092	3.57527	3.29765
ENSBTAG00000019279	ENSBTAT00000061421	-0.0576673	0.998522	1	1.87014	1.89924	2.06881	2.07144	2.35415	1.6507
ENSBTAG00000019279	ENSBTAT00000061421	-0.0576673	0.998522	1	1.87014	1.89924	2.06881	2.07144	2.35415	1.6507
ENSBTAG00000019279	ENSBTAT00000061421	-0.0576673	0.998522	1	1.87014	1.89924	2.06881	2.07144	2.35415	1.6507
ENSBTAG00000013992	ENSBTAT00000018595	-0.327867	0.0571084	0.109913	9.55454	11.1451	11.4943	13.1483	11.8323	15.4278
ENSBTAG00000016612	ENSBTAT00000022098	0.0224347	0.28033	0.399589	18.903	17.4016	18.8831	18.0164	18.7444	17.5754
ENSBTAG00000005694	ENSBTAT00000007481	-0.0314483	0.710381	0.797874	165.866	167.42	167.23	170.444	170.666	170.436
ENSBTAG00000012005	ENSBTAT00000015927	-0.282027	0.0558254	0.107819	12.3785	12.2601	13.4743	15.3746	13.2527	17.7143
ENSBTAG00000020475	ENSBTAT00000083645	-0.123505	0.441709	0.565147	12.366	13.2265	11.5809	13.4249	12.9138	14.1572
ENSBTAG00000008133	ENSBTAT00000010693	-0.209155	0.171811	0.271662	7.79028	6.25728	7.61331	8.0683	7.9592	9.01268
ENSBTAG00000008133	ENSBTAT00000010693	-0.209155	0.171811	0.271662	7.79028	6.25728	7.61331	8.0683	7.9592	9.01268
ENSBTAG00000008136	ENSBTAT00000010697	0.120061	0.016248	0.0374206	50.7214	49.5808	52.1783	49.9008	46.7032	43.7008
ENSBTAG00000013652	ENSBTAT00000018145	0.0474659	0.374606	0.499694	8.60267	7.95155	8.62927	8.26266	9.79573	6.31003
ENSBTAG00000008083	ENSBTAT00000010628	-0.29505	0.000660661	0.00218718	66.6645	65.9635	66.7848	83.0849	85.8941	75.6861
ENSBTAG00000001124	ENSBTAT00000082717	0.1837	0.0268778	0.0576339	5.63309	5.37916	6.44964	5.1277	5.10775	5.13873
ENSBTAG00000046684	ENSBTAT00000069802	0.469849	2.86529e-11	2.54795e-10	5.2458	5.48189	4.90688	3.80028	3.83488	3.65365
ENSBTAG00000046684	ENSBTAT00000069802	0.469849	2.86529e-11	2.54795e-10	5.2458	5.48189	4.90688	3.80028	3.83488	3.65365
ENSBTAG00000000362	ENSBTAT00000066709	0.176953	0.00298996	0.00843882	7.16429	7.155	7.17763	6.26839	6.90824	5.83889
ENSBTAG00000000362	ENSBTAT00000066709	0.176953	0.00298996	0.00843882	7.16429	7.155	7.17763	6.26839	6.90824	5.83889
ENSBTAG00000015965	ENSBTAT00000021230	0.191312	0.0187148	0.0422465	11.2489	10.561	10.4056	8.85744	9.99983	9.35735
ENSBTAG00000019213	ENSBTAT00000025574	0.213957	0.0292858	0.0619558	4.01957	4.10629	3.51575	3.66007	3.16103	3.21593
ENSBTAG00000010846	ENSBTAT00000073188	-0.0608838	0.978026	0.987777	2.05121	2.28828	2.42129	2.56227	2.21539	2.27454
ENSBTAG00000004814	ENSBTAT00000087266	-0.77605	2.26376e-25	4.6144e-24	9.54828	9.31909	9.70534	15.8781	16.8413	16.2096
ENSBTAG00000003965	ENSBTAT00000005171	0.13881	0.191533	0.296068	4.43713	4.40293	4.90671	3.87876	4.00518	4.60181
ENSBTAG00000001034	ENSBTAT00000001371	-1.01327	7.1317e-26	1.4794e-24	7.95299	7.13913	9.03488	16.2831	16.9669	15.4498
ENSBTAG00000001034	ENSBTAT00000001371	-1.01327	7.1317e-26	1.4794e-24	7.95299	7.13913	9.03488	16.2831	16.9669	15.4498
ENSBTAG00000006150	ENSBTAT00000008093	-0.375384	0.000663515	0.00219534	8.43751	8.45109	9.19086	11.6859	11.0566	11.0873
ENSBTAG00000018578	ENSBTAT00000024724	0.131793	0.0219133	0.0484149	16.7301	17.8576	16.6007	14.648	15.5427	16.5288
ENSBTAG00000016599	ENSBTAT00000022082	-0.226323	0.0184165	0.0416659	23.0893	25.13	24.2408	28.1655	28.3861	28.2158
ENSBTAG00000050675	ENSBTAT00000075270	-0.220078	0.147809	0.240563	5.09198	4.75332	5.2247	6.20689	5.62963	5.71696
ENSBTAG00000054656	ENSBTAT00000085587	-0.300683	0.00321844	0.00900423	4.14203	3.90128	4.20651	5.16233	5.10804	4.81806
ENSBTAG00000008674	ENSBTAT00000011436	-0.227638	0.0273701	0.0584935	21.2428	19.556	21.6179	23.8626	25.0425	24.1797
ENSBTAG00000010898	ENSBTAT00000014475	0.132808	0.0382897	0.078059	14.2137	13.2264	13.9664	12.9403	13.4566	11.3681
ENSBTAG00000027932	ENSBTAT00000061440	-0.0945724	0.597253	0.705903	9.17859	8.70158	9.56188	9.5689	10.4229	9.30945
ENSBTAG00000027932	ENSBTAT00000061440	-0.0945724	0.597253	0.705903	9.17859	8.70158	9.56188	9.5689	10.4229	9.30945
ENSBTAG00000033010	ENSBTAT00000046862	0.0161411	0.404318	0.52928	15.1878	13.6994	15.9812	14.9187	15.8895	13.561
ENSBTAG00000009020	ENSBTAT00000011877	0.494777	3.91754e-15	4.62346e-14	81.6501	81.6895	79.1412	54.6036	58.9578	58.5203
ENSBTAG00000003861	ENSBTAT00000005037	-0.178647	0.239445	0.353669	11.5003	11.505	10.8626	14.1803	12.7619	11.3902
ENSBTAG00000021102	ENSBTAT00000028111	-0.785294	2.28568e-18	3.29203e-17	11.2553	9.94728	11.6682	19.1401	18.4905	19.0203
ENSBTAG00000015521	ENSBTAT00000020624	-0.156584	0.450331	0.573698	10.8555	8.59013	7.83099	9.98459	9.86392	10.5552
ENSBTAG00000024042	ENSBTAT00000033131	-0.31032	0.0200509	0.044731	13.3821	13.1936	13.2067	16.2572	16.6421	16.4301
ENSBTAG00000010935	ENSBTAT00000076456	-0.523691	3.7418e-10	2.95936e-09	13.6381	14.0873	13.7965	21.0564	20.2345	18.4022
ENSBTAG00000020614	ENSBTAT00000027471	-0.0378591	0.877268	0.919545	1.95593	2.1374	2.01096	2.06014	2.22193	1.98454
ENSBTAG00000013749	ENSBTAT00000018269	-0.0823972	0.732092	0.814582	91.9913	93.481	88.6428	100.2	101.442	88.5848
ENSBTAG00000015723	ENSBTAT00000020872	0.0201474	0.405049	0.529894	31.8911	29.908	31.2959	32.6267	32.461	26.7163
ENSBTAG00000008987	ENSBTAT00000011826	-0.34926	0.000632489	0.00210414	9.39893	8.93166	8.90504	11.9061	12.2955	10.4941
ENSBTAG00000001424	ENSBTAT00000001867	-0.141	0.235805	0.349311	11.4406	10.8884	11.5831	12.2673	12.9313	12.1953
ENSBTAG00000015151	ENSBTAT00000079323	0.062377	0.25996	0.377187	5.87544	5.50859	5.89802	5.88327	5.59745	5.07004
ENSBTAG00000004168	ENSBTAT00000005457	0.620578	8.72451e-16	1.07343e-14	7.99405	7.42117	8.40762	5.37292	5.35131	4.77039
ENSBTAG00000017460	ENSBTAT00000023208	-1.01165	1.82317e-09	1.33751e-08	5.15862	5.31225	5.11814	9.41187	8.62129	13.3976
ENSBTAG00000000542	ENSBTAT00000081409	-0.292908	0.00286406	0.00812877	32.0762	30.4398	34.3805	42.6998	38.3815	37.6272
ENSBTAG00000007414	ENSBTAT00000009749	0.105896	0.106857	0.184144	8.07909	6.90543	8.28219	6.83978	7.78437	6.99592
ENSBTAG00000005257	ENSBTAT00000006917	0.17266	0.03366	0.0698368	10.2953	8.92777	11.2898	9.47967	9.3967	8.19483
ENSBTAG00000014159	ENSBTAT00000018815	-0.0907557	0.684257	0.778579	18.3502	20.3084	19.8096	20.3597	21.0448	20.8599
ENSBTAG00000014166	ENSBTAT00000018830	-0.0859573	0.695139	0.787336	10.0409	9.19342	9.93212	10.4709	10.22	10.2662
ENSBTAG00000000184	ENSBTAT00000000210	0.145436	0.00457245	0.0122971	11.8852	11.3463	11.6485	10.6492	10.5616	10.3244
ENSBTAG00000002542	ENSBTAT00000044927	0.158654	0.0129961	0.0308135	46.1042	41.6644	45.4625	43.7	40.9446	34.712
ENSBTAG00000052021	ENSBTAT00000071789	-0.154818	1	1	0.116374	0	0	0.049366	0.039414	0.040777
ENSBTAG00000011601	ENSBTAT00000071618	0.653683	3.28693e-08	2.11072e-07	5.60133	5.63856	4.59751	3.48297	3.45573	3.12844
ENSBTAG00000018289	ENSBTAT00000024342	0.290435	0.00393842	0.0107852	4.62738	4.64224	4.59478	3.76734	4.03548	3.53348
ENSBTAG00000018046	ENSBTAT00000024024	0.899315	2.08648e-26	4.41868e-25	13.6744	14.1365	15.0226	7.67549	8.3437	6.94564
ENSBTAG00000044173	ENSBTAT00000061137	-0.692842	7.19065e-17	9.39888e-16	8.51333	8.15578	8.16318	13.6095	14.1204	12.4106
ENSBTAG00000055296	ENSBTAT00000069519	-0.472328	2.13776e-05	9.37132e-05	5.81788	5.71532	6.94086	9.10477	8.62428	7.90087
ENSBTAG00000009299	ENSBTAT00000061249	0.445376	7.61505e-07	4.15851e-06	7.53437	6.34212	7.02856	5.11013	5.32894	4.91346
ENSBTAG00000050435	ENSBTAT00000074733	-0.426823	4.43995e-05	0.000185471	475.748	451.139	501.503	707.514	668.921	543.708
ENSBTAG00000007763	ENSBTAT00000010206	-0.145013	0.190957	0.295403	32.0055	32.3284	32.5731	35.4971	37.0462	34.6106
ENSBTAG00000011727	ENSBTAT00000085474	-0.400482	0.000582783	0.00195591	8.81105	7.36535	9.72515	11.2155	12.0847	10.8886
ENSBTAG00000011727	ENSBTAT00000085474	-0.400482	0.000582783	0.00195591	8.81105	7.36535	9.72515	11.2155	12.0847	10.8886
ENSBTAG00000011727	ENSBTAT00000085474	-0.400482	0.000582783	0.00195591	8.81105	7.36535	9.72515	11.2155	12.0847	10.8886
ENSBTAG00000018401	ENSBTAT00000063133	-0.0263137	0.826052	0.884302	2.76968	2.57847	2.87807	3.13234	2.70351	2.54179
ENSBTAG00000007808	ENSBTAT00000072891	0.794985	6.5433e-30	1.60041e-28	37.4846	40.8525	37.1262	22.8758	21.9707	21.7007
ENSBTAG00000001042	ENSBTAT00000001384	0.113748	0.243579	0.358685	2.55918	2.55173	3.04617	2.67302	2.45532	2.4103
ENSBTAG00000008985	ENSBTAT00000011824	-0.248652	0.0151866	0.0353792	40.0075	41.8157	40.3567	46.6288	45.7025	52.8302
ENSBTAG00000002783	ENSBTAT00000044517	-0.26761	0.0470095	0.0930697	17.107	21.3294	16.6422	23.4037	22.0253	20.8753
ENSBTAG00000053233	ENSBTAT00000081339	-0.0850901	0.846145	0.89824	3.19699	2.78571	3.6306	3.40783	3.39704	3.39247
ENSBTAG00000003906	ENSBTAT00000005101	-0.17016	0.283146	0.402564	6.97032	5.88934	5.9411	7.19756	7.6142	6.34255
ENSBTAG00000049389	ENSBTAT00000082769	0.0654865	0.516493	0.636183	1.21479	1.21635	1.01597	1.23261	0.934749	1.12677
ENSBTAG00000017283	ENSBTAT00000022977	-0.417861	1.54751e-05	6.95951e-05	7.6364	7.09567	7.59758	10.4658	10.0803	9.28508
ENSBTAG00000019138	ENSBTAT00000025475	0.296401	0.00120098	0.00374336	2.55154	2.41842	2.56099	1.88678	2.09991	2.14562
ENSBTAG00000019138	ENSBTAT00000025475	0.296401	0.00120098	0.00374336	2.55154	2.41842	2.56099	1.88678	2.09991	2.14562
ENSBTAG00000019983	ENSBTAT00000069775	0.113669	0.0222436	0.049011	13.4555	12.8884	12.7091	12.2804	12.5409	11.2728
ENSBTAG00000021143	ENSBTAT00000070371	-0.0897533	0.698249	0.789701	4.02137	4.05723	3.65001	4.01879	4.48559	3.97706
ENSBTAG00000015012	ENSBTAT00000019984	-0.866853	1.22039e-09	9.07344e-09	4.19372	5.51234	4.83945	8.55015	8.45752	9.51869
ENSBTAG00000015012	ENSBTAT00000019984	-0.866853	1.22039e-09	9.07344e-09	4.19372	5.51234	4.83945	8.55015	8.45752	9.51869
ENSBTAG00000016987	ENSBTAT00000022591	-0.4216	0.0378005	0.0772793	0.92756	0.798841	1.06129	1.23614	1.29077	1.20695
ENSBTAG00000031014	ENSBTAT00000060987	-0.0683577	0.911421	0.943591	3.8404	3.98017	4.3308	4.31356	4.36403	4.06339
ENSBTAG00000011155	ENSBTAT00000075614	0.254969	1.03704e-05	4.78778e-05	21.3184	19.8763	21.4407	16.9791	18.0743	17.4353
ENSBTAG00000023928	ENSBTAT00000006933	-0.105671	0.661376	0.761118	9.86882	9.17541	8.93906	8.95987	10.9423	10.2077
ENSBTAG00000048286	ENSBTAT00000028703	-0.270449	0.137188	0.226831	3.83754	2.54311	3.57237	4.15496	4.13873	3.71148
ENSBTAG00000005847	ENSBTAT00000066547	0.0705903	0.0894833	0.159487	56.8064	54.7996	57.9084	54.4171	58.1611	48.8416
ENSBTAG00000005847	ENSBTAT00000066547	0.0705903	0.0894833	0.159487	56.8064	54.7996	57.9084	54.4171	58.1611	48.8416
ENSBTAG00000001928	ENSBTAT00000002508	-0.749286	7.9968e-25	1.59098e-23	116.476	117.138	121.676	201.637	196.936	198.655
ENSBTAG00000004256	ENSBTAT00000005575	-0.257286	0.00450798	0.0121559	52.5408	49.6494	56.1764	63.7848	63.7228	61.7768
ENSBTAG00000007963	ENSBTAT00000061437	0.350989	1.24519e-08	8.38126e-08	47.2668	48.1591	48.6017	39.164	39.0245	34.7358
ENSBTAG00000019470	ENSBTAT00000025935	0.4064	1.29513e-10	1.07981e-09	31.5858	32.8461	31.9457	24.107	25.5297	23.0805
ENSBTAG00000015278	ENSBTAT00000020318	-0.290274	0.00673559	0.0173363	22.9305	22.763	21.1807	27.8468	26.7798	27.1519
ENSBTAG00000011544	ENSBTAT00000081347	-0.111041	0.448194	0.571815	13.3568	12.5877	13.5636	14.2235	14.8519	13.5936
ENSBTAG00000023885	ENSBTAT00000032812	-0.027705	0.817769	0.878538	4.64562	4.70297	4.94187	5.02994	5.06836	4.46923
ENSBTAG00000004695	ENSBTAT00000006162	-0.120088	0.35138	0.475482	41.2046	40.8286	42.3131	44.7011	44.6885	45.7501
ENSBTAG00000015436	ENSBTAT00000020526	0.3626	0.00645122	0.0167031	1.95397	1.97099	1.76236	1.48473	1.37679	1.56186
ENSBTAG00000020959	ENSBTAT00000027913	-0.120281	0.383535	0.508698	202.486	195.404	197.048	230.212	218.131	198.324
ENSBTAG00000013030	ENSBTAT00000084512	0.0462007	0.20801	0.316031	21.1817	23.6543	21.4207	20.3811	20.923	22.8643
ENSBTAG00000017922	ENSBTAT00000023834	-0.288197	0.0457702	0.0910461	5.1605	4.87172	5.86604	6.92721	6.00324	6.48312
ENSBTAG00000054738	ENSBTAT00000070848	0.457421	0.00854028	0.0213612	1.16562	1.15531	1.0169	0.860408	0.707207	0.863286
ENSBTAG00000015437	ENSBTAT00000020514	-0.558605	3.32679e-06	1.65536e-05	12.6219	12.4578	10.9734	17.2572	16.6123	19.2311
ENSBTAG00000002837	ENSBTAT00000003678	0.901044	1.31369e-36	4.28128e-35	30.1513	27.4993	28.7536	14.6326	16.3071	15.3296
ENSBTAG00000004204	ENSBTAT00000005512	0.133555	0.0215506	0.0476742	25.8969	23.6248	25.8767	21.4297	23.2106	24.0916
ENSBTAG00000048071	ENSBTAT00000072388	-0.315643	0.00565763	0.0148412	8.33907	7.78978	8.63958	10.1519	10.7159	9.95816
ENSBTAG00000048071	ENSBTAT00000072388	-0.315643	0.00565763	0.0148412	8.33907	7.78978	8.63958	10.1519	10.7159	9.95816
ENSBTAG00000004400	ENSBTAT00000010939	-0.0986146	0.557496	0.671515	15.9838	14.7541	14.4784	15.5068	16.6137	16.2947
ENSBTAG00000004091	ENSBTAT00000077124	-0.00101643	0.61913	0.725224	5.70216	4.8127	5.25901	5.47932	5.14056	5.16511
ENSBTAG00000004091	ENSBTAT00000077124	-0.00101643	0.61913	0.725224	5.70216	4.8127	5.25901	5.47932	5.14056	5.16511
ENSBTAG00000001353	ENSBTAT00000001782	-0.229353	0.0460641	0.0915707	26.5138	28.3003	26.7731	31.2373	29.1105	35.2977
ENSBTAG00000030317	ENSBTAT00000026527	0.0148168	0.545139	0.661414	4.31011	3.46776	4.28782	4.01131	4.2613	3.6698
ENSBTAG00000020646	ENSBTAT00000027514	-0.00292511	0.845871	0.898105	1.85607	1.96653	2.21656	2.71938	1.86782	1.46422
ENSBTAG00000020646	ENSBTAT00000027514	-0.00292511	0.845871	0.898105	1.85607	1.96653	2.21656	2.71938	1.86782	1.46422
ENSBTAG00000008241	ENSBTAT00000010843	-0.195231	0.114592	0.195151	18.686	16.3774	16.1818	19.6304	19.5091	19.5316
ENSBTAG00000001947	ENSBTAT00000053384	-0.619057	1	1	0.165146	0.133267	0.14475	0.312061	0.246165	0.122415
ENSBTAG00000001947	ENSBTAT00000053384	-0.619057	1	1	0.165146	0.133267	0.14475	0.312061	0.246165	0.122415
ENSBTAG00000018372	ENSBTAT00000054442	-0.0718667	0.848599	0.899206	21.115	18.2744	19.5948	19.0663	20.4633	22.4673
ENSBTAG00000053107	ENSBTAT00000076309	-0.308275	0.0171636	0.0392403	63.6129	58.9246	64.6082	70.0736	68.6638	92.9915
ENSBTAG00000014873	ENSBTAT00000019802	-0.0893281	0.831381	0.887995	10.2921	8.92958	7.91741	8.57321	10.4465	9.85285
ENSBTAG00000003970	ENSBTAT00000005179	-0.173368	0.455024	0.578102	8.39331	6.2831	8.40438	9.41408	8.98045	7.63339
ENSBTAG00000043999	ENSBTAT00000066497	0.0665481	0.158923	0.254931	5.25703	5.16513	5.07889	4.80126	5.21528	4.78572
ENSBTAG00000043999	ENSBTAT00000066497	0.0665481	0.158923	0.254931	5.25703	5.16513	5.07889	4.80126	5.21528	4.78572
ENSBTAG00000012449	ENSBTAT00000016523	0.0523893	0.24047	0.354924	6.29116	5.47753	6.46681	5.59487	6.07479	5.91552
ENSBTAG00000004328	ENSBTAT00000082120	0.275778	2.3247e-05	0.000101142	15.4161	15.3367	15.759	12.1469	12.5652	13.7069
ENSBTAG00000025898	ENSBTAT00000036694	-0.227988	0.0273019	0.0583952	9.50119	10.1845	10.4604	11.4381	12.1201	11.749
ENSBTAG00000020124	ENSBTAT00000026804	0.0638984	0.294191	0.414678	5.87162	4.93373	5.32036	4.99978	5.31428	5.11301
ENSBTAG00000049783	ENSBTAT00000079812	-0.138717	0.690877	0.783862	3.12739	2.47942	2.44892	2.39936	3.55026	2.91914
ENSBTAG00000015441	ENSBTAT00000020520	-0.209478	0.0508674	0.0995781	517.563	567.408	504.188	613.037	578.602	645.859
ENSBTAG00000011172	ENSBTAT00000047267	-0.0169001	0.696887	0.78862	2.78558	2.69982	3.22481	3.07824	3.2279	2.5067
ENSBTAG00000011172	ENSBTAT00000047267	-0.0169001	0.696887	0.78862	2.78558	2.69982	3.22481	3.07824	3.2279	2.5067
ENSBTAG00000011172	ENSBTAT00000047267	-0.0169001	0.696887	0.78862	2.78558	2.69982	3.22481	3.07824	3.2279	2.5067
ENSBTAG00000011172	ENSBTAT00000047267	-0.0169001	0.696887	0.78862	2.78558	2.69982	3.22481	3.07824	3.2279	2.5067
ENSBTAG00000009242	ENSBTAT00000012184	0.00965306	0.411576	0.535781	32.2751	30.682	34.0098	34.0846	33.7932	28.4425
ENSBTAG00000009242	ENSBTAT00000012184	0.00965306	0.411576	0.535781	32.2751	30.682	34.0098	34.0846	33.7932	28.4425
ENSBTAG00000008548	ENSBTAT00000011270	-0.0218328	0.629923	0.734658	39.7045	38.344	39.3016	41.6485	40.3381	37.1529
ENSBTAG00000009021	ENSBTAT00000011880	-0.20306	0.0669048	0.1252	19.4575	20.2926	19.1849	23.6049	23.1679	21.0694
ENSBTAG00000018590	ENSBTAT00000024742	0.123109	0.0245199	0.0532732	9.94117	10.0378	10.0528	9.56744	9.56439	8.44358
ENSBTAG00000039770	ENSBTAT00000053855	0.00590271	0.408695	0.533128	31.999	29.4741	32.6442	32.814	31.9645	28.9544
ENSBTAG00000001113	ENSBTAT00000001470	-0.305447	0.0237337	0.051843	6.41882	6.31766	6.29288	7.45662	7.85768	8.20221
ENSBTAG00000001114	ENSBTAT00000070039	-0.1902	0.052094	0.101711	19.0275	18.4807	19.1404	22.1083	21.6844	20.839
ENSBTAG00000001114	ENSBTAT00000070039	-0.1902	0.052094	0.101711	19.0275	18.4807	19.1404	22.1083	21.6844	20.839
ENSBTAG00000023736	ENSBTAT00000032505	-0.266956	0.00690458	0.0176997	117.485	127.366	128.377	156.595	156.928	135.57
ENSBTAG00000010531	ENSBTAT00000013922	0.491419	3.99214e-05	0.000168385	2.98426	2.79663	3.37212	2.13602	2.14321	2.23154
ENSBTAG00000014679	ENSBTAT00000019540	-0.231511	0.0267614	0.0574451	8.22371	7.94021	8.60823	10.2169	9.72886	9.13832
ENSBTAG00000044255	ENSBTAT00000061688	0.810564	1	1	0	0	0.157521	0	0.089812	0
ENSBTAG00000013861	ENSBTAT00000018452	-0.0414544	0.87391	0.917142	7.51977	7.48098	7.64926	7.87089	7.4989	7.94049
ENSBTAG00000007508	ENSBTAT00000066115	0.0178641	0.440024	0.563699	9.13861	9.99683	10.7614	10.5317	8.8414	10.1559
ENSBTAG00000007508	ENSBTAT00000066115	0.0178641	0.440024	0.563699	9.13861	9.99683	10.7614	10.5317	8.8414	10.1559
ENSBTAG00000001425	ENSBTAT00000001868	0.0405245	0.243301	0.358405	23.073	22.1206	21.4263	22.9017	22.9979	18.875
ENSBTAG00000001425	ENSBTAT00000001868	0.0405245	0.243301	0.358405	23.073	22.1206	21.4263	22.9017	22.9979	18.875
ENSBTAG00000019458	ENSBTAT00000025921	-0.252515	0.144776	0.236545	3.60822	2.67096	3.42156	3.67186	4.34151	3.54295
ENSBTAG00000011104	ENSBTAT00000036144	0.329217	0.0030393	0.00856216	261.7	235.755	253.794	223.252	231.225	143.493
ENSBTAG00000011104	ENSBTAT00000036144	0.329217	0.0030393	0.00856216	261.7	235.755	253.794	223.252	231.225	143.493
ENSBTAG00000017469	ENSBTAT00000069307	-0.416571	1.10817e-05	5.09681e-05	9.83677	9.81197	10.4612	13.9135	14.4673	11.8085
ENSBTAG00000017469	ENSBTAT00000069307	-0.416571	1.10817e-05	5.09681e-05	9.83677	9.81197	10.4612	13.9135	14.4673	11.8085
ENSBTAG00000000545	ENSBTAT00000067169	-0.099374	0.621316	0.726992	24.2186	22.2787	25.9127	26.2689	28.4962	22.8083
ENSBTAG00000002557	ENSBTAT00000003312	0.028826	0.366536	0.491031	20.6191	19.7775	21.8382	19.4085	22.9019	18.6933
ENSBTAG00000038011	ENSBTAT00000055080	1.33519	1.69278e-21	2.90231e-20	2.10679	2.03666	1.98129	0.814437	0.793582	0.819456
ENSBTAG00000054181	ENSBTAT00000071309	1.16382	1	1	0.490702	0.510956	0.702235	0.335785	0.296389	0.128324
ENSBTAG00000016038	ENSBTAT00000068648	-0.294555	0.00837651	0.0210035	4.69218	4.05535	4.54258	5.3485	6.01167	4.94023
ENSBTAG00000021140	ENSBTAT00000028174	-0.3161	0.00196983	0.00584031	18.384	16.8748	17.7629	22.0432	24.2538	19.713
ENSBTAG00000013580	ENSBTAT00000018069	0.0911611	0.0421438	0.0849022	15.7553	14.9553	16.1595	15.1622	15.0317	13.8062
ENSBTAG00000004823	ENSBTAT00000006331	-0.358433	0.00150026	0.00457989	28.1047	27.2077	31.3219	40.4688	35.1777	35.4215
ENSBTAG00000020873	ENSBTAT00000027808	-0.272357	0.00319847	0.00895661	44.075	44.6059	49.8177	57.0872	56.5659	53.6226
ENSBTAG00000038116	ENSBTAT00000027753	0.0151636	0.451215	0.574162	20.8699	18.7566	21.8003	20.5171	21.0582	19.2092
ENSBTAG00000005654	ENSBTAT00000007429	-0.531613	1.61004e-11	1.46057e-10	1696.89	1771.72	1678.91	2503.38	2376.88	2560.71
ENSBTAG00000006027	ENSBTAT00000085412	-0.0514525	0.947202	0.9671	16.2884	15.4578	16.8509	16.692	17.6161	16.0535
ENSBTAG00000006027	ENSBTAT00000085412	-0.0514525	0.947202	0.9671	16.2884	15.4578	16.8509	16.692	17.6161	16.0535
ENSBTAG00000013254	ENSBTAT00000017629	-0.61729	1.43332e-10	1.1885e-09	15.5982	14.3068	14.9838	23.6534	25.4084	19.7972
ENSBTAG00000009290	ENSBTAT00000012239	-0.755689	6.65092e-06	3.16557e-05	3.87368	3.68844	2.87221	6.31243	6.02295	5.28234
ENSBTAG00000000899	ENSBTAT00000044807	-0.322335	0.00854971	0.0213804	14.7831	12.8251	13.5228	17.5132	18.2459	15.6693
ENSBTAG00000000115	ENSBTAT00000084043	-0.133113	0.460033	0.583064	6.30835	5.32318	6.59373	6.7459	7.2687	5.97227
ENSBTAG00000020865	ENSBTAT00000027798	-0.189018	0.17094	0.270566	12.0526	12.2412	15.1599	15.4562	16.1042	13.4163
ENSBTAG00000016720	ENSBTAT00000022227	-0.111213	0.435441	0.559106	157.612	145.31	161.446	171.992	171.18	158.408
ENSBTAG00000016939	ENSBTAT00000022529	0.153541	0.115158	0.195949	3.13651	2.75741	2.76383	2.53539	2.88453	2.36376
ENSBTAG00000023744	ENSBTAT00000032525	-0.00139392	0.554947	0.669372	34.0239	32.5064	34.3553	33.6414	38.2706	29.0711
ENSBTAG00000018196	ENSBTAT00000024220	0.0287409	0.221449	0.332174	22.7668	21.9572	23.079	22.3907	22.8328	21.2422
ENSBTAG00000055077	ENSBTAT00000078324	-0.567692	1.87936e-05	8.32067e-05	53.2676	40.6395	44.5767	57.9829	72.5971	74.6739
ENSBTAG00000003904	ENSBTAT00000005098	-0.26185	0.010652	0.0259804	11.5031	11.7033	12.9467	14.5485	14.6729	14.1267
ENSBTAG00000011324	ENSBTAT00000015049	-0.927331	2.59033e-25	5.248e-24	16.1417	15.4039	14.711	27.9475	27.7737	32.2475
ENSBTAG00000013403	ENSBTAT00000079929	-0.716491	2.5397e-12	2.47575e-11	5.99179	5.14164	5.47919	9.61563	9.43492	8.24697
ENSBTAG00000018761	ENSBTAT00000024978	-0.0344484	0.787006	0.85663	14.4801	14.8851	14.6197	14.294	14.6766	16.0772
ENSBTAG00000007837	ENSBTAT00000010310	-0.316576	0.0161275	0.0371791	7.05295	6.89023	7.52221	9.02344	9.05169	8.65724
ENSBTAG00000015007	ENSBTAT00000064008	0.0884616	0.0362336	0.074532	13.954	14.0206	14.319	13.5251	13.5576	12.6956
ENSBTAG00000015007	ENSBTAT00000064008	0.0884616	0.0362336	0.074532	13.954	14.0206	14.319	13.5251	13.5576	12.6956
ENSBTAG00000015007	ENSBTAT00000064008	0.0884616	0.0362336	0.074532	13.954	14.0206	14.319	13.5251	13.5576	12.6956
ENSBTAG00000020059	ENSBTAT00000043571	-1.81871	5.55602e-17	7.35718e-16	0.321585	0.246193	0.361744	1.24093	1.08187	0.956235
ENSBTAG00000016045	ENSBTAT00000021347	-0.389248	0.0490564	0.0964969	1.25866	1.65177	1.3283	2.18726	1.66496	1.6993
ENSBTAG00000016045	ENSBTAT00000021347	-0.389248	0.0490564	0.0964969	1.25866	1.65177	1.3283	2.18726	1.66496	1.6993
ENSBTAG00000012090	ENSBTAT00000016033	-0.154421	0.225547	0.337072	15.7609	14.727	15.593	17.6849	17.0274	16.5746
ENSBTAG00000016367	ENSBTAT00000021769	-0.111982	0.570113	0.682895	21.3823	18.896	19.9672	19.9771	21.4848	23.6462
ENSBTAG00000039815	ENSBTAT00000043362	0.0137346	0.773534	0.845753	2.91083	1.81221	2.1322	2.84687	2.01736	1.92607
ENSBTAG00000038610	ENSBTAT00000043363	0.157655	0.243842	0.358985	2.84443	2.20933	2.45187	2.26825	2.44455	2.01586
ENSBTAG00000015286	ENSBTAT00000020327	0.233083	0.00141916	0.0043487	7.4787	7.21165	7.1991	6.55488	6.58636	5.48264
ENSBTAG00000007662	ENSBTAT00000057533	-0.539281	1.07092e-11	9.86225e-11	734.954	716.746	811.953	1133.45	1098.91	1057.28
ENSBTAG00000012156	ENSBTAT00000016123	0.214244	0.0357972	0.0737544	2.5578	2.81916	2.70585	2.34703	2.26148	2.35885
ENSBTAG00000011317	ENSBTAT00000084718	-0.0929956	0.590715	0.700081	41.5983	42.2635	40.373	44.6289	44.2992	43.5786
ENSBTAG00000012484	ENSBTAT00000016564	-0.254347	0.306667	0.428275	0.768681	0.877152	0.685942	0.877438	1.04918	0.854713
ENSBTAG00000008973	ENSBTAT00000011810	-0.2135	0.099871	0.174405	7.88781	9.03864	7.82056	9.47691	9.88096	9.33623
ENSBTAG00000020313	ENSBTAT00000027072	0.0481954	0.18204	0.284395	7.44114	7.23066	6.89291	6.93731	7.28393	6.63496
ENSBTAG00000020313	ENSBTAT00000027072	0.0481954	0.18204	0.284395	7.44114	7.23066	6.89291	6.93731	7.28393	6.63496
ENSBTAG00000004542	ENSBTAT00000042953	-0.470163	0.00418911	0.0114112	1.17215	1.15178	1.25229	1.52841	1.70833	1.71727
ENSBTAG00000020791	ENSBTAT00000066818	0.742749	2.66401e-09	1.92446e-08	6.10506	6.27876	9.31612	4.04302	4.63587	4.28899
ENSBTAG00000024822	ENSBTAT00000042924	0.0146348	0.348443	0.472627	9.24914	8.3264	9.35161	8.80962	9.43976	8.406
ENSBTAG00000024822	ENSBTAT00000042924	0.0146348	0.348443	0.472627	9.24914	8.3264	9.35161	8.80962	9.43976	8.406
ENSBTAG00000024822	ENSBTAT00000042924	0.0146348	0.348443	0.472627	9.24914	8.3264	9.35161	8.80962	9.43976	8.406
ENSBTAG00000003530	ENSBTAT00000042916	-0.273698	0.00114239	0.00358381	74.9169	77.1138	77.2486	92.0921	92.9669	92.1173
ENSBTAG00000005190	ENSBTAT00000006842	0.181069	0.000761183	0.00248333	9.82094	9.56034	9.77374	8.63447	8.67748	8.40421
ENSBTAG00000006008	ENSBTAT00000007892	-0.259682	0.0222072	0.0489485	5.76031	5.31729	4.8741	6.16088	6.17312	6.76361
ENSBTAG00000006008	ENSBTAT00000007892	-0.259682	0.0222072	0.0489485	5.76031	5.31729	4.8741	6.16088	6.17312	6.76361
ENSBTAG00000051352	ENSBTAT00000072528	-0.179739	0.0673886	0.125988	63.6176	65.5282	64.7413	72.4542	73.6285	73.5291
ENSBTAG00000050928	ENSBTAT00000081722	0.0265743	1	1	0.378888	0.30371	0.291471	0.252947	0.288234	0.41511
ENSBTAG00000047715	ENSBTAT00000064376	0.480997	2.76024e-06	1.39284e-05	5.09578	5.32382	4.65981	3.46126	3.6721	3.67077
ENSBTAG00000038691	ENSBTAT00000016098	0.156023	0.0398239	0.0809124	13.0573	12.7809	14.7031	11.7212	11.8624	12.8021
ENSBTAG00000011862	ENSBTAT00000015745	0.670767	0.00985055	0.0241906	0.442076	0.30168	0.43768	0.209763	0.330266	0.202117
ENSBTAG00000012443	ENSBTAT00000061079	-1.79933	2.34658e-78	2.12873e-76	3.80567	3.88456	3.42944	13.4678	13.2216	12.0135
ENSBTAG00000016637	ENSBTAT00000022129	-0.200147	0.118334	0.200372	29.723	29.9654	30.7175	36.4957	38.0549	29.309
ENSBTAG00000034885	ENSBTAT00000049347	-0.0514623	0.97559	0.9863	4.31782	4.991	4.3267	4.01331	4.53176	5.58562
ENSBTAG00000014752	ENSBTAT00000019629	-0.169102	0.109042	0.187409	12.5818	11.7883	12.6541	13.5287	14.5335	13.5662
ENSBTAG00000014752	ENSBTAT00000019629	-0.169102	0.109042	0.187409	12.5818	11.7883	12.6541	13.5287	14.5335	13.5662
ENSBTAG00000014752	ENSBTAT00000019629	-0.169102	0.109042	0.187409	12.5818	11.7883	12.6541	13.5287	14.5335	13.5662
ENSBTAG00000016691	ENSBTAT00000022192	-0.598	3.23643e-09	2.31288e-08	14.9507	13.6545	16.2409	23.7149	23.6793	20.4856
ENSBTAG00000009416	ENSBTAT00000070166	0.267279	0.000156855	0.000593444	8.54044	8.56838	8.98707	7.28509	7.8898	6.5078
ENSBTAG00000009416	ENSBTAT00000070166	0.267279	0.000156855	0.000593444	8.54044	8.56838	8.98707	7.28509	7.8898	6.5078
ENSBTAG00000016529	ENSBTAT00000021981	0.11758	0.0356869	0.0735666	13.7917	13.3904	13.8361	12.3916	12.8287	12.5875
ENSBTAG00000019501	ENSBTAT00000025978	-0.215389	0.385553	0.510653	8.81861	5.84104	8.04928	9.87013	9.26308	7.23224
ENSBTAG00000050479	ENSBTAT00000082031	-0.218765	0.178252	0.279972	7.80734	7.46259	8.81921	8.99919	9.52463	9.5096
ENSBTAG00000006640	ENSBTAT00000008728	-0.38864	0.000185755	0.000695208	8.27715	8.11173	8.15888	11.4494	11.5143	9.17314
ENSBTAG00000002271	ENSBTAT00000002932	0.419915	4.41976e-06	2.15251e-05	14.7558	13.4679	16.5913	11.7521	11.3567	10.389
ENSBTAG00000007329	ENSBTAT00000009641	-0.0201405	0.780298	0.850828	4.21595	3.58061	3.78633	3.71702	4.74293	3.28577
ENSBTAG00000008173	ENSBTAT00000010745	0.139116	0.0757743	0.138847	10.2638	9.90552	10.4756	9.7384	10.1509	7.9386
ENSBTAG00000020149	ENSBTAT00000026838	-0.509866	0.000321501	0.00114207	5.50683	5.91343	5.57043	8.87636	8.93314	6.38386
ENSBTAG00000010337	ENSBTAT00000013659	-0.21361	0.132672	0.220413	9.57217	8.37739	9.7474	10.4119	11.1676	10.5376
ENSBTAG00000020374	ENSBTAT00000027155	-0.194378	0.223679	0.334858	3.15211	3.65169	3.4111	3.71659	4.07847	3.89314
ENSBTAG00000010949	ENSBTAT00000014539	0.143492	0.0338527	0.0701882	4.40726	4.78938	4.34167	4.12296	4.18388	3.94972
ENSBTAG00000009405	ENSBTAT00000012378	0.197023	0.000716737	0.00234526	11.5936	11.133	11.5132	9.66873	10.6898	9.51052
ENSBTAG00000009405	ENSBTAT00000012378	0.197023	0.000716737	0.00234526	11.5936	11.133	11.5132	9.66873	10.6898	9.51052
ENSBTAG00000012409	ENSBTAT00000016499	-1.05187	3.35242e-32	9.01594e-31	120.343	143.509	130.812	283.911	284.546	249.767
ENSBTAG00000008040	ENSBTAT00000010577	0.232502	6.24925e-05	0.000253135	27.0014	24.9052	26.7684	22.7496	23.2494	20.9658
ENSBTAG00000008040	ENSBTAT00000010577	0.232502	6.24925e-05	0.000253135	27.0014	24.9052	26.7684	22.7496	23.2494	20.9658
ENSBTAG00000021815	ENSBTAT00000067678	0.0844895	0.0523955	0.102202	11.4972	11.9116	11.6707	11.0557	11.2277	10.8007
ENSBTAG00000023279	ENSBTAT00000009870	0.232586	0.000537007	0.00181683	8.47395	8.32111	8.02617	7.66508	6.90757	6.55289
ENSBTAG00000023279	ENSBTAT00000067533	0.232586	0.000537007	0.00181683	8.47395	8.32111	8.02617	7.66508	6.90757	6.55289
ENSBTAG00000023279	ENSBTAT00000067533	0.232586	0.000537007	0.00181683	8.47395	8.32111	8.02617	7.66508	6.90757	6.55289
ENSBTAG00000000993	ENSBTAT00000001315	-0.182064	0.163536	0.261123	9.85957	9.60733	10.5161	11.836	11.9143	10.2656
ENSBTAG00000026384	ENSBTAT00000037484	-0.190288	0.511979	0.63216	1.43123	1.37583	1.70088	1.7381	1.41486	1.99055
ENSBTAG00000005012	ENSBTAT00000006600	-0.226326	0.0230976	0.0506996	18.9962	18.0357	19.0703	23.0279	22.4881	20.1152
ENSBTAG00000018103	ENSBTAT00000024094	-0.852297	3.95723e-22	6.95145e-21	64.0142	71.5013	70.7874	136.162	120.937	115.355
[truncated: 1,914 more rows]
