# Supplementary material for: MEF2C Expression Is Regulated by the Post-transcriptional Activation of the METTL3-m6A-YTHDF1 Axis in Myoblast Differentiation
Source: Front Vet Sci. 2022 Apr 28;9:900924. doi: 10.3389/fvets.2022.900924 (PMC9096896; doi:10.3389/fvets.2022.900924)
Supplement: Supplementary file 5 [file Table_5.XLSX]

## Sheet: Sheet 1
Supplementary Table 5. Differentially expressed transcripts which show lower m6A enrichment in DM compared to GM.
geneId	transcriptId	log2(fc)	pval	FPKM.DM_1_input	FPKM.DM_2_input	FPKM.DM_3_input	FPKM.GM_1_input	FPKM.GM_2_input	FPKM.GM_3_input
ENSBTAG00000003063	ENSBTAT00000003985	-0.12087	0.486536	5.61992	5.74541	5.33725	6.42396	6.33407	5.4042
ENSBTAG00000003063	ENSBTAT00000003985	-0.12087	0.486536	5.61992	5.74541	5.33725	6.42396	6.33407	5.4042
ENSBTAG00000018855	ENSBTAT00000083963	0.130485	0.0265163	11.7637	11.6245	10.2004	10.2024	10.5513	9.93025
ENSBTAG00000050914	ENSBTAT00000067905	-2.65106	2.52006e-19	0.037417	0.0584689	0.0574871	0.383061	0.342455	0.237863
ENSBTAG00000017753	ENSBTAT00000067940	0.143777	0.00418954	348.01	335.808	339.231	306.441	295.998	323.571
ENSBTAG00000010987	ENSBTAT00000014591	0.530845	1.14343e-06	5.35425	6.03451	5.29324	4.47519	3.46413	3.60712
ENSBTAG00000048497	ENSBTAT00000071140	0.355256	0.131109	0.869448	0.942528	0.731897	0.611147	0.865814	0.511663
ENSBTAG00000001511	ENSBTAT00000001978	0.868014	5.72463e-31	23.9558	24.13	21.4552	13.2672	12.2834	12.5509
ENSBTAG00000017312	ENSBTAT00000023020	4.00739	1.81417e-52	3.21778	3.51006	3.47855	0.12196	0.23051	0.282171
ENSBTAG00000011742	ENSBTAT00000068839	-0.151464	0.234928	29.6953	28.3186	29.3358	31.5597	35.6297	29.8296
ENSBTAG00000049676	ENSBTAT00000067844	0.499873	1	0.342628	0.314579	0.525524	0.209209	0.365215	0.261967
ENSBTAG00000013938	ENSBTAT00000066794	0.22822	0.0022591	9.16101	10.3542	10.9302	8.40197	8.58464	9.00428
ENSBTAG00000018727	ENSBTAT00000063751	0.406605	1.50865e-08	18.2488	19.6952	17.0881	14.7861	13.5591	13.1708
ENSBTAG00000048819	ENSBTAT00000071905	-3.7963	1	0.0098	0	0	0	0.136153	0
ENSBTAG00000017418	ENSBTAT00000023157	-0.0236956	0.696529	8.17184	7.69556	7.83981	8.17931	8.12649	7.79401
ENSBTAG00000007100	ENSBTAT00000009338	0.0768009	0.0804155	9.32699	9.56823	8.71575	8.42449	9.25293	8.50213
ENSBTAG00000010658	ENSBTAT00000056305	-0.420877	2.51891e-06	27.979	29.2316	28.3808	35.4058	38.4371	40.7416
ENSBTAG00000023907	ENSBTAT00000083892	0.893401	4.97935e-29	11.7331	10.7851	10.2626	5.73908	5.73842	6.16981
ENSBTAG00000023907	ENSBTAT00000083892	0.893401	4.97935e-29	11.7331	10.7851	10.2626	5.73908	5.73842	6.16981
ENSBTAG00000023907	ENSBTAT00000083892	0.893401	4.97935e-29	11.7331	10.7851	10.2626	5.73908	5.73842	6.16981
ENSBTAG00000011802	ENSBTAT00000015668	0.0445061	0.167596	1300.97	1352.08	1242	1230.22	1223.4	1323.11
ENSBTAG00000019269	ENSBTAT00000043412	0.0300997	0.22943	644.258	615.826	618.409	584.612	604.918	650.176
ENSBTAG00000005503	ENSBTAT00000007234	-0.112821	0.551895	6.38211	6.309	6.36441	7.06367	6.97105	6.57079
ENSBTAG00000014306	ENSBTAT00000019018	-0.455254	0.00185216	0.618	0.585368	0.643959	0.816672	0.873163	0.842895
ENSBTAG00000026156	ENSBTAT00000037060	0.14538	0.0125435	68.524	71.6898	74.5336	59.3486	64.5698	70.2437
ENSBTAG00000014889	ENSBTAT00000019822	-0.845818	3.19681e-28	55.6279	59.5174	57.5138	101.829	109.368	99.1198
ENSBTAG00000022155	ENSBTAT00000029891	0.258113	1.37634e-05	834.946	853.55	858.628	738.187	746.171	645.498
ENSBTAG00000023607	ENSBTAT00000072141	-0.059758	0.960556	59.0481	57.986	59.5936	64.8813	60.7953	58.4208
ENSBTAG00000014567	ENSBTAT00000086177	0.368655	9.83424e-10	24.8406	25.7837	25.9812	19.4137	20.0716	19.8461
ENSBTAG00000021364	ENSBTAT00000028482	-0.293694	0.00908088	4.21753	4.11914	4.00169	5.0527	4.77063	5.30073
ENSBTAG00000011414	ENSBTAT00000015168	-0.294067	0.00330898	14.5186	16.0269	14.9999	18.6401	17.5674	19.6355
ENSBTAG00000031891	ENSBTAT00000045228	0.868147	1	0.243975	0.169481	0.107818	0.103608	0.095308	0.086664
ENSBTAG00000014960	ENSBTAT00000031972	-0.228852	0.0452404	7.45959	6.98363	7.21382	7.77052	9.07458	8.53483
ENSBTAG00000019952	ENSBTAT00000070152	0.0460149	0.249625	5.0252	5.10768	5.02216	5.04853	5.11434	4.51642
ENSBTAG00000018508	ENSBTAT00000085114	0.751745	0.00346908	0.540948	0.366151	0.387137	0.183679	0.324205	0.260743
ENSBTAG00000018768	ENSBTAT00000008696	-1.09361	3.65145e-41	70.8566	65.7173	71.1334	155.268	154.285	133.711
ENSBTAG00000011437	ENSBTAT00000015200	0.192658	0.00135426	14.9855	15.3209	15.9113	13.4024	14.5974	12.4403
ENSBTAG00000017321	ENSBTAT00000023029	-0.170043	0.144194	26.8387	24.8458	28.7058	29.8317	30.7254	29.8895
ENSBTAG00000024162	ENSBTAT00000043357	-0.324057	0.0124964	3.68985	3.47333	3.49959	4.83078	4.141	4.37635
ENSBTAG00000004777	ENSBTAT00000086647	-0.0942386	0.721996	9.88528	10.2322	9.11855	10.0594	10.5211	10.629
ENSBTAG00000044270	ENSBTAT00000061703	0	1	NA	NA	NA	NA	NA	NA
ENSBTAG00000023377	ENSBTAT00000031822	-0.171106	0.220942	18.1019	18.414	18.475	19.5589	19.4884	22.8681
ENSBTAG00000015834	ENSBTAT00000021041	-0.213109	0.626922	0.270146	0.385679	0.229721	0.331007	0.470196	0.225307
ENSBTAG00000006003	ENSBTAT00000050755	-0.110862	0.573135	7.90828	8.7805	7.2301	8.71734	8.51233	8.59969
ENSBTAG00000019177	ENSBTAT00000069350	-0.155773	0.18662	29.0807	25.1988	28.3649	29.6512	30.9196	31.4967
ENSBTAG00000019177	ENSBTAT00000084388	-0.155773	0.18662	29.0807	25.1988	28.3649	29.6512	30.9196	31.4967
ENSBTAG00000001585	ENSBTAT00000067065	0.693719	3.78359e-22	18.5026	20.2088	19.0451	11.6463	12.8231	11.2389
ENSBTAG00000011909	ENSBTAT00000015797	0.286328	4.4255e-07	40.0208	39.2405	40.909	32.4182	33.9705	32.1493
ENSBTAG00000006907	ENSBTAT00000061000	1.06997	9.27353e-41	42.6044	35.9562	45.2155	18.7517	20.3681	19.8384
ENSBTAG00000011256	ENSBTAT00000073370	-0.404568	1.10042e-06	61.6027	60.2887	64.8629	84.907	85.7878	76.5106
ENSBTAG00000019231	ENSBTAT00000025606	-0.015899	0.768428	5.94532	6.35544	6.70523	6.91163	6.23496	6.07
ENSBTAG00000016297	ENSBTAT00000038209	-0.246616	0.0146071	45.3926	45.3329	47.6517	57.5106	57.5337	49.1294
ENSBTAG00000005596	ENSBTAT00000007349	-0.838047	7.75506e-14	60.9168	71.138	58.1051	106.218	103.741	129.977
ENSBTAG00000020610	ENSBTAT00000038173	0.211787	0.0132939	5.93276	6.71396	6.68557	6.03111	5.64494	5.01675
ENSBTAG00000046176	ENSBTAT00000066051	-0.712445	3.17914e-16	3.83308	3.41714	3.8775	5.87118	5.9407	6.42177
ENSBTAG00000046176	ENSBTAT00000066051	-0.712445	3.17914e-16	3.83308	3.41714	3.8775	5.87118	5.9407	6.42177
ENSBTAG00000052917	ENSBTAT00000072763	1.89467	1	0.09986	0	0.140703	0.064696	0	0
ENSBTAG00000053975	ENSBTAT00000066398	0	1	NA	NA	NA	NA	NA	NA
ENSBTAG00000002549	ENSBTAT00000003305	-0.645033	6.92052e-16	212.787	213.781	235.49	355.451	331.08	348.777
ENSBTAG00000045943	ENSBTAT00000053164	0.409387	2.33716e-08	55.1658	54.2938	57.5662	40.7735	38.6578	46.3297
ENSBTAG00000004603	ENSBTAT00000006041	-0.0748699	0.804095	28.988	29.9698	30.9586	30.1527	30.1629	34.3903
ENSBTAG00000008331	ENSBTAT00000038048	-0.301331	0.247627	1.55797	1.99063	1.61361	1.7871	2.61834	1.95585
ENSBTAG00000008331	ENSBTAT00000038048	-0.301331	0.247627	1.55797	1.99063	1.61361	1.7871	2.61834	1.95585
ENSBTAG00000037902	ENSBTAT00000052158	1.20102	2.69583e-06	1.50955	1.64585	1.35614	0.614751	0.767232	0.580392
ENSBTAG00000010657	ENSBTAT00000038011	-0.0796684	0.910132	0.857241	0.98882	0.644892	0.844305	0.867075	0.920997
ENSBTAG00000010378	ENSBTAT00000013699	0.0778563	0.0848693	24.3443	23.1829	23.812	22.1487	22.0671	23.3755
ENSBTAG00000026676	ENSBTAT00000038035	0.105664	0.0410693	22.8137	26.3207	22.8039	21.8924	22.4576	22.5077
ENSBTAG00000026676	ENSBTAT00000038035	0.105664	0.0410693	22.8137	26.3207	22.8039	21.8924	22.4576	22.5077
ENSBTAG00000017253	ENSBTAT00000022932	-0.0733984	0.891696	3.80892	3.735	4.18709	4.48882	4.02856	3.8259
ENSBTAG00000007554	ENSBTAT00000009939	0.522894	0.00125871	7.45604	6.41504	6.34413	4.42612	3.89833	5.74481
ENSBTAG00000037456	ENSBTAT00000061325	0.279378	0.0002243	5.57386	5.73257	4.95962	4.58632	4.58536	4.23067
ENSBTAG00000018374	ENSBTAT00000071995	0.0720371	0.0782222	39.388	41.3118	37.0005	37.8171	38.3283	35.8221
ENSBTAG00000018374	ENSBTAT00000071995	0.0720371	0.0782222	39.388	41.3118	37.0005	37.8171	38.3283	35.8221
ENSBTAG00000008766	ENSBTAT00000055788	-0.211471	0.0584603	8.74337	9.46648	8.25323	10.0125	10.2908	10.3375
ENSBTAG00000008766	ENSBTAT00000055788	-0.211471	0.0584603	8.74337	9.46648	8.25323	10.0125	10.2908	10.3375
ENSBTAG00000021832	ENSBTAT00000029103	-0.14351	0.393089	6.5916	6.43131	6.59856	6.76795	7.43354	7.47218
ENSBTAG00000002977	ENSBTAT00000076810	-0.189038	0.061178	10.8443	10.8782	11.0934	12.2959	12.4909	12.6233
ENSBTAG00000040215	ENSBTAT00000061629	0.144978	0.00429152	26.8183	25.7391	25.8829	24.1865	24.6746	22.0797
ENSBTAG00000050449	ENSBTAT00000056672	0.195994	1	0.122381	0.209651	0.061099	0.058924	0.201015	0.083253
ENSBTAG00000030340	ENSBTAT00000006694	-0.312147	0.0516583	10.5594	12.5697	10.2108	13.3633	11.848	16.1821
ENSBTAG00000030340	ENSBTAT00000006694	-0.312147	0.0516583	10.5594	12.5697	10.2108	13.3633	11.848	16.1821
ENSBTAG00000030335	ENSBTAT00000020285	-0.479678	3.37775e-06	11.2935	11.8698	10.4316	15.243	14.6082	16.9945
ENSBTAG00000008309	ENSBTAT00000010946	0.244865	0.00469567	4.28614	3.79695	3.72653	3.17782	3.44274	3.34551
ENSBTAG00000003832	ENSBTAT00000004994	0.800631	5.13335e-21	34.4177	37.6744	35.117	20.1535	18.5787	22.8163
ENSBTAG00000051080	ENSBTAT00000076508	-0.381047	0.0146318	12.4092	9.42827	15.256	14.3438	17.9754	15.9871
ENSBTAG00000055045	ENSBTAT00000079646	-0.946146	9.46972e-36	16.06	16.6027	16.4309	31.757	32.0161	30.8166
ENSBTAG00000004835	ENSBTAT00000006353	0.0104596	0.880292	0.36565	0.186055	0.312241	0.420885	0.197312	0.239508
ENSBTAG00000004835	ENSBTAT00000006353	0.0104596	0.880292	0.36565	0.186055	0.312241	0.420885	0.197312	0.239508
ENSBTAG00000004835	ENSBTAT00000006353	0.0104596	0.880292	0.36565	0.186055	0.312241	0.420885	0.197312	0.239508
ENSBTAG00000016030	ENSBTAT00000021334	-0.0752961	1	0.088254	0.04507	0.101533	0.073832	0.075729	0.097879
ENSBTAG00000029990	ENSBTAT00000042369	0	1	NA	NA	NA	NA	NA	NA
ENSBTAG00000016334	ENSBTAT00000071510	0.185021	0.181529	0.974776	0.792915	0.940793	0.733313	0.942709	0.706459
ENSBTAG00000027201	ENSBTAT00000014638	0.240078	0.00458658	4.832	4.11929	4.16468	3.73771	3.89654	3.47103
ENSBTAG00000002485	ENSBTAT00000086283	0.622341	6.83317e-22	55.149	57.4775	55.5	34.6274	37.3058	37.2845
ENSBTAG00000002485	ENSBTAT00000086283	0.622341	6.83317e-22	55.149	57.4775	55.5	34.6274	37.3058	37.2845
ENSBTAG00000002485	ENSBTAT00000086283	0.622341	6.83317e-22	55.149	57.4775	55.5	34.6274	37.3058	37.2845
ENSBTAG00000002485	ENSBTAT00000086283	0.622341	6.83317e-22	55.149	57.4775	55.5	34.6274	37.3058	37.2845
ENSBTAG00000002485	ENSBTAT00000086283	0.622341	6.83317e-22	55.149	57.4775	55.5	34.6274	37.3058	37.2845
ENSBTAG00000026772	ENSBTAT00000044020	0.114552	0.1068	3.81534	3.93628	3.36169	2.99832	3.6032	3.6635
ENSBTAG00000013798	ENSBTAT00000018336	-1.2839	1.02636e-13	1.29715	0.841445	1.01384	2.49518	2.55342	2.62747
ENSBTAG00000052917	ENSBTAT00000072763	1.89467	1	0.09986	0	0.140703	0.064696	0	0
ENSBTAG00000020537	ENSBTAT00000027364	-2.90011	1	0.018005	0	0	0.134404	0	0
ENSBTAG00000040338	ENSBTAT00000060992	0.205738	0.0018099	11.625	11.209	10.4742	9.28132	9.14083	10.4593
ENSBTAG00000015752	ENSBTAT00000020915	-0.534694	0.000710871	2.51483	1.99924	2.24996	3.57383	3.11364	3.11113
ENSBTAG00000016174	ENSBTAT00000021529	-0.279313	0.00156262	246.905	250.502	256.566	309.699	288	317.336
ENSBTAG00000008331	ENSBTAT00000038048	-0.301331	0.247627	1.55797	1.99063	1.61361	1.7871	2.61834	1.95585
ENSBTAG00000018062	ENSBTAT00000043303	0.561373	0.000146616	1.33517	1.5816	1.3291	0.964604	0.907251	1.00538
ENSBTAG00000012698	ENSBTAT00000085007	-0.387545	1.64157e-06	35.8503	34.829	36.8908	48.0631	46.0902	46.5662
ENSBTAG00000015103	ENSBTAT00000071189	-0.317604	0.0982989	2.3602	3.25451	2.33307	3.34002	3.01423	3.55073
ENSBTAG00000010366	ENSBTAT00000076106	0.929355	2.27451e-08	1.75428	1.6646	2.00489	0.813146	1.16057	0.874268
ENSBTAG00000010366	ENSBTAT00000076106	0.929355	2.27451e-08	1.75428	1.6646	2.00489	0.813146	1.16057	0.874268
ENSBTAG00000012848	ENSBTAT00000017076	1.49335	7.59634e-63	6.20465	6.01995	5.71096	2.25101	2.04022	2.07923
ENSBTAG00000002727	ENSBTAT00000003535	0.0265939	0.652422	8.74171	5.28316	7.87391	8.26233	5.3136	7.92288
ENSBTAG00000010249	ENSBTAT00000013540	-0.153547	0.329374	12.9192	13.7816	12.1425	13.1301	14.2995	15.7758
ENSBTAG00000053588	ENSBTAT00000070605	-0.456243	3.6896e-07	13.0272	13.4632	12.1798	16.8015	18.4267	17.8259
ENSBTAG00000046672	ENSBTAT00000063552	-0.237722	0.214558	5.76186	5.5415	4.6589	6.21543	5.95841	6.64772
ENSBTAG00000014447	ENSBTAT00000037922	-1.15858	3.65361e-09	0.539232	0.500849	0.572852	1.33245	1.07693	1.19128
ENSBTAG00000009580	ENSBTAT00000012599	-0.164101	0.324745	170.541	215.308	166.623	198.898	188.367	231.762
ENSBTAG00000019399	ENSBTAT00000025847	0.375403	1	0.338346	0.313749	0.24127	0.343955	0.210512	0.134219
ENSBTAG00000021778	ENSBTAT00000029033	0.298765	5.13144e-06	37.3681	41.5449	36.4582	31.0136	30.5419	32.2353
ENSBTAG00000017108	ENSBTAT00000031588	-0.364339	0.00700091	7.15374	8.09995	7.80091	9.75484	10.0321	9.89109
ENSBTAG00000003822	ENSBTAT00000042789	-0.153122	0.379316	1.66165	1.69501	1.74384	1.76979	1.92721	1.97462
ENSBTAG00000034147	ENSBTAT00000015933	-0.047215	0.932987	6.94095	5.99658	5.76678	6.225	6.42026	6.68131
ENSBTAG00000021897	ENSBTAT00000057494	-0.312864	0.0416639	3.00768	2.40415	2.47158	3.20074	3.332	3.2598
ENSBTAG00000017856	ENSBTAT00000023735	-0.872368	0.00999663	1.31682	1.83595	1.90806	1.85926	3.72826	3.67717
ENSBTAG00000018487	ENSBTAT00000079630	0.131177	0.455618	0.350316	0.499393	0.513309	0.462793	0.336818	0.444944
ENSBTAG00000005716	ENSBTAT00000007515	0.817494	2.53234e-30	42.3112	40.5921	39.9026	23.3422	22.1069	24.2344
ENSBTAG00000000404	ENSBTAT00000080451	-0.0893508	0.712674	18.5114	22.0074	20.8381	22.3006	20.5738	22.4027
ENSBTAG00000046545	ENSBTAT00000071606	0.0336994	0.320352	16.1534	17.0862	16.3516	15.0662	15.1763	18.2038
ENSBTAG00000009434	ENSBTAT00000012414	0.279774	0.127053	0.888242	1.18198	1.10101	0.799501	0.768261	1.04445
ENSBTAG00000012094	ENSBTAT00000046975	0.0928744	0.0542766	31.8901	35.3049	31.5952	31.116	29.9305	31.5844
ENSBTAG00000000057	ENSBTAT00000079983	0.731708	1.09473e-19	26.2311	27.229	24.52	14.6198	15.0167	17.3224
ENSBTAG00000007515	ENSBTAT00000009889	0.159756	0.00252292	28.2874	28.5205	26.8795	25.5896	24.3949	24.9306
ENSBTAG00000014692	ENSBTAT00000019554	0.272604	0.136554	1.08092	1.23373	1.31945	0.852139	1.30048	0.855777
ENSBTAG00000014204	ENSBTAT00000018877	-0.133859	0.356561	74.7055	78.736	74.3415	79.7266	77.4151	92.7874
ENSBTAG00000015145	ENSBTAT00000020148	-0.336331	0.000557257	209.194	236.026	209.565	283.82	257.712	285.16
ENSBTAG00000021289	ENSBTAT00000033883	0.104522	0.0348485	6.76017	7.05695	7.00849	6.55186	6.54914	6.26917
ENSBTAG00000007320	ENSBTAT00000009627	-0.0291068	0.718952	15.3585	16.6959	15.3133	16.5546	15.6308	16.1476
ENSBTAG00000018074	ENSBTAT00000024063	0.00920972	0.479144	14.9337	16.0965	15.2125	14.8064	14.2267	16.9154
ENSBTAG00000012495	ENSBTAT00000016577	-0.19094	0.0992866	25.8864	29.3898	26.1802	31.4701	30.0992	31.4137
ENSBTAG00000037565	ENSBTAT00000072991	0.551606	1	0.126466	0.249591	0.150654	0.109652	0.105843	0.143859
ENSBTAG00000007909	ENSBTAT00000010400	1.0585	1.28179e-51	126.563	124.792	123.766	56.6823	59.1637	64.261
ENSBTAG00000011500	ENSBTAT00000087392	2.23524	9.84586e-184	101.461	88.455	102.563	20.6147	20.2972	21.2064
ENSBTAG00000020966	ENSBTAT00000027924	-0.22591	0.269087	3.50606	3.71795	2.94347	3.53566	4.18651	4.16884
ENSBTAG00000020761	ENSBTAT00000027667	-0.0790528	0.803391	15.2864	13.7569	15.0121	16.2375	16.9176	13.3817
ENSBTAG00000002721	ENSBTAT00000079224	0.512645	4.73272e-11	7.98862	8.38348	8.16398	5.85835	6.24216	5.09772
ENSBTAG00000045664	ENSBTAT00000064452	0.0376864	0.178944	27.4648	25.8506	26.6877	25.5005	26.9406	25.4991
ENSBTAG00000008690	ENSBTAT00000011454	-0.222023	0.0149948	33.7597	33.3141	33.0178	38.4731	38.5967	39.6739
ENSBTAG00000015887	ENSBTAT00000060940	0.157685	0.00496063	10.9209	11.0564	11.6587	9.88919	10.8098	9.45447
ENSBTAG00000020745	ENSBTAT00000027644	0.0999928	0.434728	0.303326	0.264551	0.278688	0.2823	0.289642	0.217935
ENSBTAG00000015113	ENSBTAT00000020109	-0.209817	0.339158	3.82746	4.54484	3.42388	4.6469	4.87203	4.12384
ENSBTAG00000007300	ENSBTAT00000009604	-0.0683152	0.888621	20.7662	23.1753	22.8437	23.8594	21.4331	24.7313
ENSBTAG00000015969	ENSBTAT00000021243	-0.298198	0.00206739	8.46196	8.84331	8.84908	10.9649	10.3663	10.8284
ENSBTAG00000015969	ENSBTAT00000071402	-0.298198	0.00206739	8.46196	8.84331	8.84908	10.9649	10.3663	10.8284
ENSBTAG00000002826	ENSBTAT00000003659	-2.0378	1.13873e-20	0.48499	0.526667	0.342475	2.26442	1.81076	1.48515
ENSBTAG00000005858	ENSBTAT00000007700	-0.304786	1	0	0	0.021098	0	0	0.026061
ENSBTAG00000014079	ENSBTAT00000018720	0.107625	0.022925	19.1431	20.4277	18.8453	18.4567	18.1149	17.6452
ENSBTAG00000000149	ENSBTAT00000070077	-0.409288	0.00017307	4.28568	5.06758	5.41561	6.79878	6.6316	6.18313
ENSBTAG00000005354	ENSBTAT00000068452	0.395627	9.88495e-11	23.2112	23.4401	22.7245	17.4215	18.3264	16.9888
ENSBTAG00000010164	ENSBTAT00000063447	0.942492	1	0.117501	0.262713	0.15787	0.035672	0.089161	0.15515
ENSBTAG00000015996	ENSBTAT00000018329	0.465519	1.95654e-14	112.497	116.372	112.855	80.4882	84.05	82.9416
ENSBTAG00000015996	ENSBTAT00000018329	0.465519	1.95654e-14	112.497	116.372	112.855	80.4882	84.05	82.9416
ENSBTAG00000007215	ENSBTAT00000009492	0.604793	2.06192e-15	22.8376	25.5178	23.4092	15.4889	14.9766	16.7245
ENSBTAG00000007215	ENSBTAT00000009492	0.604793	2.06192e-15	22.8376	25.5178	23.4092	15.4889	14.9766	16.7245
ENSBTAG00000002847	ENSBTAT00000003690	0.201082	0.0704941	2.55027	3.22635	2.72599	2.25855	2.3555	2.78236
ENSBTAG00000002847	ENSBTAT00000003690	0.201082	0.0704941	2.55027	3.22635	2.72599	2.25855	2.3555	2.78236
ENSBTAG00000004334	ENSBTAT00000083662	0.119375	0.0187049	33.2733	34.8959	31.0174	31.6059	29.9377	29.7662
ENSBTAG00000005799	ENSBTAT00000007626	-0.244242	0.0461404	22.5256	25.1495	21.9557	25.0453	26.5921	30.8382
ENSBTAG00000012405	ENSBTAT00000033952	0.844932	7.94935e-12	2.99588	3.49044	2.69369	1.56436	1.7824	1.76409
ENSBTAG00000009436	ENSBTAT00000012416	0.518195	3.98813e-06	4.76722	4.71459	4.62845	2.98856	3.36305	3.50081
ENSBTAG00000009432	ENSBTAT00000012411	-1.66633	8.82806e-23	2.35321	2.03299	2.85126	8.19281	7.35768	7.42162
ENSBTAG00000014840	ENSBTAT00000067601	-0.132061	0.506714	9.72978	9.49369	8.84249	10.7354	8.87218	11.1488
ENSBTAG00000010663	ENSBTAT00000072569	0.426652	6.8826e-08	10.9669	11.5169	10.7017	7.98088	7.9208	8.78785
ENSBTAG00000021512	ENSBTAT00000028669	-0.48066	6.60545e-07	10.577	9.52469	9.8814	13.2002	13.3029	15.3347
ENSBTAG00000000186	ENSBTAT00000081315	0.03628	0.501144	4.23399	3.96516	3.62139	4.06063	3.50452	3.96184
ENSBTAG00000043590	ENSBTAT00000060582	-2.74868	1	0.193096	0.295266	0.538544	3.30076	0.866011	2.73506
ENSBTAG00000006235	ENSBTAT00000008186	0.138897	0.00927695	14.8556	15.8395	14.5008	13.975	13.3232	13.7493
ENSBTAG00000017564	ENSBTAT00000023352	1.09433	1.78826e-38	7.98604	7.56046	7.54904	3.81814	3.33264	3.66608
ENSBTAG00000018070	ENSBTAT00000024057	0.129976	0.0837498	22.4431	20.1859	18.5333	18.014	18.807	19.072
ENSBTAG00000003604	ENSBTAT00000068865	1.23158	1.33774e-52	18.5669	20.8201	17.7241	7.81732	8.15276	8.35075
ENSBTAG00000013946	ENSBTAT00000018533	0.278205	4.62782e-05	20.7918	19.8152	20.6198	18.6089	15.8688	16.0109
ENSBTAG00000021634	ENSBTAT00000028829	0.12469	0.0234916	22.5903	23.9368	21.6282	19.5194	21.3152	21.6776
ENSBTAG00000008022	ENSBTAT00000056377	0.500233	9.24633e-17	66.5887	66.1119	66.7697	45.8873	48.0643	47.0724
ENSBTAG00000001246	ENSBTAT00000086781	-0.192362	0.0404021	101.848	105.009	104.093	118.124	119.128	118.049
ENSBTAG00000001981	ENSBTAT00000002571	-0.615792	3.3295e-11	40.9225	46.4838	39.0192	62.6329	63.1713	67.9301
ENSBTAG00000000283	ENSBTAT00000000353	-0.574112	2.9135e-13	21.5363	19.7768	21.6934	32.1332	30.6837	30.9845
ENSBTAG00000037673	ENSBTAT00000021896	-1.5601	3.12644e-10	0.951008	1.57748	0.884296	3.56145	3.06002	3.44192
ENSBTAG00000013018	ENSBTAT00000080896	-0.106355	0.544668	8.82954	8.14129	8.54471	8.80624	9.12486	9.5365
ENSBTAG00000012962	ENSBTAT00000017232	-0.614835	2.41505e-14	144.202	158.547	155.483	233.445	226.937	241.348
ENSBTAG00000004383	ENSBTAT00000005756	0.0859514	0.0648993	13.9089	14.5483	14.7453	13.6989	13.948	13.0569
ENSBTAG00000018739	ENSBTAT00000067088	-0.114641	0.555516	5.10549	4.46969	5.29421	5.24485	5.96575	4.88856
ENSBTAG00000000074	ENSBTAT00000033431	-0.672546	6.099e-05	0.861385	0.829495	1.05853	1.53342	1.37139	1.47743
ENSBTAG00000000074	ENSBTAT00000033431	-0.672546	6.099e-05	0.861385	0.829495	1.05853	1.53342	1.37139	1.47743
ENSBTAG00000010715	ENSBTAT00000014187	-0.233503	0.0222998	25.0416	25.4593	24.2599	29.3607	28.6951	29.8394
ENSBTAG00000009527	ENSBTAT00000012535	0.251271	0.0172863	6.33949	5.43605	5.22425	4.50998	4.46141	5.31107
ENSBTAG00000012514	ENSBTAT00000016614	3.34176	3.92089e-229	23.9075	23.5057	21.6363	2.30611	1.94213	2.56243
ENSBTAG00000007507	ENSBTAT00000009880	-0.131151	0.70929	1.09303	1.38474	1.43944	1.22515	1.56168	1.50317
ENSBTAG00000020444	ENSBTAT00000087105	0.153394	0.0041175	10.8618	11.1787	11.5231	9.8317	9.84296	10.5035
ENSBTAG00000017368	ENSBTAT00000023094	-0.297921	0.00443317	706.538	819.46	703.56	904.483	862.611	973.862
ENSBTAG00000038617	ENSBTAT00000052178	0.690979	0.00670289	0.595199	0.72428	0.44021	0.460138	0.340021	0.289851
ENSBTAG00000016696	ENSBTAT00000033225	0.159524	0.0148527	7.04302	6.7314	6.91497	6.40336	5.94757	6.17271
ENSBTAG00000000149	ENSBTAT00000070077	-0.409288	0.00017307	4.28568	5.06758	5.41561	6.79878	6.6316	6.18313
ENSBTAG00000011538	ENSBTAT00000015335	-0.238992	0.188305	1.19559	1.21026	0.899636	1.35102	1.34613	1.20389
ENSBTAG00000004315	ENSBTAT00000070810	-0.190387	0.0525773	135.918	140.112	136.711	153.503	153.4	164.062
ENSBTAG00000004315	ENSBTAT00000070810	-0.190387	0.0525773	135.918	140.112	136.711	153.503	153.4	164.062
ENSBTAG00000009676	ENSBTAT00000012764	-0.0152428	0.619049	15.0862	16.3935	15.4981	15.4872	15.4312	16.5583
ENSBTAG00000011543	ENSBTAT00000015337	-0.21228	0.362497	1.45453	2.22435	1.96323	2.21398	2.24083	2.08168
ENSBTAG00000004976	ENSBTAT00000075947	-0.359955	0.000530228	14.5788	12.8801	14.7644	18.1026	19.9046	16.1817
ENSBTAG00000008139	ENSBTAT00000010700	0.00738851	0.805235	1.89142	0.934129	1.55243	1.62085	1.13539	1.59939
ENSBTAG00000008139	ENSBTAT00000010700	0.00738851	0.805235	1.89142	0.934129	1.55243	1.62085	1.13539	1.59939
ENSBTAG00000051248	ENSBTAT00000068714	0.208555	0.241651	2.23272	0.986928	2.04274	1.77059	1.35071	1.43279
ENSBTAG00000012241	ENSBTAT00000082243	-0.314735	0.0280576	3.37824	3.01276	3.25986	4.42671	3.8615	3.71537
ENSBTAG00000010671	ENSBTAT00000033607	0.0355895	0.289301	5.14587	5.53746	5.26751	5.17942	4.93187	5.45088
ENSBTAG00000011002	ENSBTAT00000014612	-0.335083	0.00374369	3.67234	3.50688	3.77725	4.5379	4.40259	4.88054
ENSBTAG00000013953	ENSBTAT00000018566	0.367282	6.10732e-10	1103.45	1159.7	1113.35	895.271	894.081	828.253
ENSBTAG00000002431	ENSBTAT00000003151	0.18583	0.0099064	7.01864	7.20608	7.59412	6.16068	7.04965	5.97156
ENSBTAG00000002431	ENSBTAT00000003151	0.18583	0.0099064	7.01864	7.20608	7.59412	6.16068	7.04965	5.97156
ENSBTAG00000020484	ENSBTAT00000027295	-0.0861537	0.834093	2.70504	2.79232	2.70158	3.06061	3.05085	2.59201
ENSBTAG00000017970	ENSBTAT00000077490	-0.187948	0.120958	108.807	130.367	113.318	134.661	128.002	138.874
ENSBTAG00000020445	ENSBTAT00000027245	0.303079	0.0136816	1.61785	1.70472	1.74407	1.28358	1.40572	1.41732
ENSBTAG00000038241	ENSBTAT00000056211	-0.1566	0.31275	5.03114	5.22533	5.11147	5.77244	6.09441	5.26312
ENSBTAG00000007759	ENSBTAT00000043827	-0.247482	0.0321981	5.52578	6.01602	6.26468	6.96164	7.347	6.83002
ENSBTAG00000010243	ENSBTAT00000083319	-0.150942	0.251634	8.79518	9.33445	9.07359	10.1475	9.51583	10.5402
ENSBTAG00000016435	ENSBTAT00000043572	-0.0723951	0.867639	9.36133	10.1943	9.68056	9.16013	10.157	11.4235
ENSBTAG00000015981	ENSBTAT00000021259	-0.720809	4.32093e-11	5.99299	7.26157	6.60731	11.8849	10.5748	10.2748
ENSBTAG00000053836	ENSBTAT00000085779	-0.103625	1	0.703551	1.31739	1.03892	1.1189	0.807125	1.3617
ENSBTAG00000011997	ENSBTAT00000015917	0.409452	1.93192e-07	7.2504	8.32008	7.20284	5.6422	5.51262	5.99143
ENSBTAG00000006029	ENSBTAT00000007922	0.081599	0.182233	17.9744	22.1776	16.5918	17.3695	17.0821	19.1718
ENSBTAG00000012237	ENSBTAT00000033669	0.751987	3.48473e-28	260.107	274.992	250.264	147.92	157.924	160.494
ENSBTAG00000012237	ENSBTAT00000033669	0.751987	3.48473e-28	260.107	274.992	250.264	147.92	157.924	160.494
ENSBTAG00000000296	ENSBTAT00000085598	-0.427397	0.000106633	6.39186	7.1994	6.34464	8.50539	9.01816	9.28635
ENSBTAG00000010452	ENSBTAT00000013799	-1.31163	4.09687e-07	0.455102	0.412769	0.42639	0.922461	0.881179	1.40901
ENSBTAG00000001576	ENSBTAT00000002060	-0.296914	1	0.227286	0.201275	0.513001	0.371458	0.3989	0.386364
ENSBTAG00000002810	ENSBTAT00000003635	0.0856776	0.151288	6.00087	5.6165	5.48098	5.04633	5.52843	5.53773
ENSBTAG00000031106	ENSBTAT00000018668	-0.0432659	0.902791	4.26615	3.89863	4.24584	4.1276	4.52335	4.1375
ENSBTAG00000004215	ENSBTAT00000005523	1.25668	4.08319e-16	8.10446	8.04863	8.68126	3.55942	2.73713	4.09676
ENSBTAG00000014372	ENSBTAT00000078286	0.492208	8.84719e-12	32.0283	31.8922	32.7498	23.8522	24.3985	20.4757
ENSBTAG00000024199	ENSBTAT00000028347	0.145827	0.0220555	4.10744	3.93258	4.28052	3.31858	3.72461	4.09286
ENSBTAG00000035083	ENSBTAT00000049560	0.085751	0.0527553	36.0909	33.3511	36.4453	34.0251	34.9326	30.8192
ENSBTAG00000015016	ENSBTAT00000019992	0.357265	2.38499e-07	25.8298	29.4038	25.6594	21.3171	20.5933	21.2382
ENSBTAG00000020757	ENSBTAT00000074083	-0.367281	9.77061e-06	76.3847	78.7696	76.6835	97.2204	97.8406	103.991
ENSBTAG00000007204	ENSBTAT00000007288	0.197288	0.150669	3.65915	2.69508	3.3454	3.11844	3.40276	1.9387
ENSBTAG00000014429	ENSBTAT00000019193	-0.0350767	0.788652	4.84907	4.77093	4.84625	4.46516	5.27268	5.08444
ENSBTAG00000014429	ENSBTAT00000019193	-0.0350767	0.788652	4.84907	4.77093	4.84625	4.46516	5.27268	5.08444
ENSBTAG00000044736	ENSBTAT00000062169	0	1	NA	NA	NA	NA	NA	NA
ENSBTAG00000014429	ENSBTAT00000019193	-0.0350767	0.788652	4.84907	4.77093	4.84625	4.46516	5.27268	5.08444
ENSBTAG00000014426	ENSBTAT00000046133	-0.00116679	0.450793	24.4171	24.9272	23.6201	24.5264	25.0761	23.421
ENSBTAG00000051755	ENSBTAT00000072252	-0.694838	6.72257e-13	44.5609	45.4069	44.6212	71.9688	65.1043	80.7865
ENSBTAG00000021810	ENSBTAT00000029071	-0.0823245	0.719624	22.7525	24.0092	23.1828	24.8156	23.6898	25.5464
ENSBTAG00000016414	ENSBTAT00000070955	0.555579	3.83394e-14	39.5376	44.4018	37.9512	27.2454	27.1458	28.5413
ENSBTAG00000016508	ENSBTAT00000038164	0.0048954	0.363599	53.4249	53.7178	53.2556	54.3316	54.2994	51.2239
ENSBTAG00000016913	ENSBTAT00000084348	1.89226	1.24575e-13	0.674955	1.02187	0.77957	0.158833	0.278267	0.230002
ENSBTAG00000018361	ENSBTAT00000024431	-0.249693	0.00672821	20.3435	21.1452	19.6822	24.5653	23.9986	24.1656
ENSBTAG00000018361	ENSBTAT00000024431	-0.249693	0.00672821	20.3435	21.1452	19.6822	24.5653	23.9986	24.1656
ENSBTAG00000017840	ENSBTAT00000038215	-0.278475	0.00227633	12.244	12.0726	11.0944	14.2692	14.6211	14.0602
ENSBTAG00000020459	ENSBTAT00000027263	-0.129362	0.431894	3.57986	3.87608	3.49164	4.02265	4.05957	3.89235
ENSBTAG00000004376	ENSBTAT00000061314	-0.786098	4.15204e-15	3.20419	3.17721	3.20424	5.73308	5.41389	5.38255
ENSBTAG00000011762	ENSBTAT00000015626	-0.540432	2.02069e-10	11.8696	11.3625	10.9904	16.2467	16.2092	17.3177
ENSBTAG00000014697	ENSBTAT00000071881	-0.0356356	0.787153	19.7398	21.1173	20.1312	20.851	19.8108	21.8517
ENSBTAG00000012897	ENSBTAT00000017145	-2.07186	5.00488e-130	5.6877	4.79344	5.0021	21.5875	21.7795	21.7288
ENSBTAG00000001509	ENSBTAT00000086512	-0.503233	3.834e-07	8.82345	8.54435	8.62423	13.0597	12.5429	11.2381
ENSBTAG00000012793	ENSBTAT00000016998	-0.123309	0.777229	1.87455	2.11524	1.69533	1.7197	1.74062	2.73208
ENSBTAG00000030646	ENSBTAT00000045619	-0.107733	0.709187	2.60793	3.37597	2.99535	3.03157	3.33931	3.30456
ENSBTAG00000030646	ENSBTAT00000045619	-0.107733	0.709187	2.60793	3.37597	2.99535	3.03157	3.33931	3.30456
ENSBTAG00000030646	ENSBTAT00000043312	-0.107733	0.709187	2.60793	3.37597	2.99535	3.03157	3.33931	3.30456
ENSBTAG00000014759	ENSBTAT00000084915	-0.19116	0.056143	25.1835	26.7748	26.207	30.3672	30.1424	28.7303
ENSBTAG00000009663	ENSBTAT00000074030	-0.0278729	0.738631	108.944	126.597	130.129	119.201	122.682	130.92
ENSBTAG00000019742	ENSBTAT00000026309	0.120867	0.0300566	12.8748	13.6682	12.6893	12.6902	12.0661	11.3231
ENSBTAG00000017072	ENSBTAT00000022702	0.0442683	0.244308	8.57909	8.79639	8.26094	7.83622	8.45741	8.5681
ENSBTAG00000017072	ENSBTAT00000022702	0.0442683	0.244308	8.57909	8.79639	8.26094	7.83622	8.45741	8.5681
ENSBTAG00000045460	ENSBTAT00000062893	-0.492257	1	0.412495	0.116558	0.144386	0.081896	0.122856	0.742537
ENSBTAG00000014733	ENSBTAT00000019607	0.051864	0.198421	18.8015	19.6835	20.1768	18.5578	17.5106	20.522
ENSBTAG00000004211	ENSBTAT00000005522	-0.141673	0.241958	46.1717	47.0175	44.2765	50.1317	48.8177	52.7006
ENSBTAG00000005221	ENSBTAT00000066850	0.156445	0.00316886	14.1242	14.9199	13.495	12.6432	12.9074	12.6168
ENSBTAG00000009704	ENSBTAT00000056494	0.766785	4.80235e-07	1.14654	1.22333	1.20284	0.632314	0.737063	0.730396
ENSBTAG00000030258	ENSBTAT00000028798	-0.59577	3.29378e-10	12.1244	14.359	13.2819	20.1911	19.9387	19.9667
ENSBTAG00000051118	ENSBTAT00000073064	0.0548877	0.292376	2.76319	2.83948	3.01472	2.75016	2.73419	2.81134
ENSBTAG00000002539	ENSBTAT00000042716	0.208778	0.000175194	10.4093	11.0883	10.7987	9.13339	9.55263	9.25895
ENSBTAG00000002539	ENSBTAT00000042716	0.208778	0.000175194	10.4093	11.0883	10.7987	9.13339	9.55263	9.25895
ENSBTAG00000008434	ENSBTAT00000067920	-0.0959192	0.834568	1.23998	1.18894	0.843103	1.09148	1.20204	1.20344
ENSBTAG00000037703	ENSBTAT00000026064	-0.414859	2.57586e-06	10.2998	11.0379	10.0192	13.7416	14.1628	13.8997
ENSBTAG00000037703	ENSBTAT00000026064	-0.414859	2.57586e-06	10.2998	11.0379	10.0192	13.7416	14.1628	13.8997
ENSBTAG00000037703	ENSBTAT00000026064	-0.414859	2.57586e-06	10.2998	11.0379	10.0192	13.7416	14.1628	13.8997
ENSBTAG00000010324	ENSBTAT00000065429	-0.474021	1.15819e-06	6.89783	7.40422	6.7693	9.85289	9.57834	9.83636
ENSBTAG00000019828	ENSBTAT00000026418	-0.149414	0.391934	5.50763	5.4099	4.82104	5.44061	5.5481	6.46722
ENSBTAG00000016198	ENSBTAT00000021556	0.105636	0.0191384	12.3379	11.7642	11.8682	10.9782	11.2573	11.1952
ENSBTAG00000004004	ENSBTAT00000005226	0.0496021	0.235362	13.2024	14.7522	12.1908	12.5236	13.2729	12.9922
ENSBTAG00000004004	ENSBTAT00000005226	0.0496021	0.235362	13.2024	14.7522	12.1908	12.5236	13.2729	12.9922
ENSBTAG00000014265	ENSBTAT00000018956	1.05071	9.55671e-49	24.0474	26.3383	23.8752	12.2447	12.0575	11.5458
ENSBTAG00000005595	ENSBTAT00000077168	-0.32065	0.00213803	9.58179	9.76382	10.7211	12.6758	12.4223	12.4519
ENSBTAG00000001931	ENSBTAT00000002512	-0.173838	0.311945	7.33714	7.93584	8.14541	8.10772	8.08393	10.2256
ENSBTAG00000043949	ENSBTAT00000061166	0.129747	0.059165	25.2038	29.8872	25.4848	24.1134	22.8253	26.7069
ENSBTAG00000004484	ENSBTAT00000067615	-0.12612	0.554514	5.62095	5.02325	5.488	6.75239	5.95688	4.89668
ENSBTAG00000023670	ENSBTAT00000032405	0.212974	0.103773	13.0317	15.4675	14.8583	13.1076	11.3044	12.995
ENSBTAG00000009238	ENSBTAT00000012174	-0.165849	0.30847	6.81056	7.67916	6.33279	8.12436	7.3128	7.92206
ENSBTAG00000020757	ENSBTAT00000074083	-0.367281	9.77061e-06	76.3847	78.7696	76.6835	97.2204	97.8406	103.991
ENSBTAG00000021467	ENSBTAT00000073855	-1.02148	2.22989e-35	38.0148	41.718	38.4694	78.0723	77.7537	84.1241
ENSBTAG00000006904	ENSBTAT00000080918	-0.424417	4.86244e-05	6.53048	7.64206	6.35182	9.30176	9.30757	8.93499
ENSBTAG00000006883	ENSBTAT00000072758	-0.409519	4.18633e-06	161.999	180.73	161.413	230.015	214.19	225.418
ENSBTAG00000016296	ENSBTAT00000021683	-0.276414	0.28691	0.852419	0.767823	0.910542	0.842142	1.17478	1.04832
ENSBTAG00000016589	ENSBTAT00000084486	-0.14959	0.413389	3.35308	3.55351	2.77649	3.4959	3.69373	3.55137
ENSBTAG00000008499	ENSBTAT00000073143	-3.56358	1.20267e-50	0.228097	0.574574	0.432585	4.51711	5.01939	5.06853
ENSBTAG00000021808	ENSBTAT00000029069	0.36503	1.0564e-05	8.99579	10.0786	8.54387	6.90728	6.92212	7.61489
ENSBTAG00000021105	ENSBTAT00000028115	-0.082631	0.756756	12.9609	12.2988	13.8495	14.1917	14.6538	12.5691
ENSBTAG00000007152	ENSBTAT00000009410	0.344992	4.24375e-07	74.5187	79.2105	70.7407	59.6438	55.0785	62.0057
ENSBTAG00000023289	ENSBTAT00000023967	0.603029	0.000539612	1.1699	1.384	1.44842	0.870161	0.864825	0.900027
ENSBTAG00000018003	ENSBTAT00000072165	0.0865799	0.0596701	20.5893	20.5289	19.0534	19.7638	18.88	18.023
ENSBTAG00000010616	ENSBTAT00000014034	-0.260658	0.0388057	4.93652	5.46405	5.25701	6.56264	6.04883	6.14669
ENSBTAG00000006631	ENSBTAT00000008704	-1.15789	2.2349e-06	0.258747	0.390388	0.305102	0.582286	0.751066	0.795851
ENSBTAG00000006599	ENSBTAT00000008663	-2.19833	2.00953e-36	1.24618	1.16805	1.07649	4.8156	5.08416	6.1208
ENSBTAG00000010830	ENSBTAT00000017556	0.821448	8.66787e-26	302.341	301.122	291.582	151.845	167.615	187.024
ENSBTAG00000010451	ENSBTAT00000013796	-0.190103	0.0848051	128.465	139.626	133.202	154.199	142.091	161.523
ENSBTAG00000020663	ENSBTAT00000027540	-0.131414	0.394663	30.9774	33.0995	31.2124	35.7889	32.6701	35.9176
ENSBTAG00000011918	ENSBTAT00000015810	-0.363949	0.0115434	47.0086	50.7995	44.7147	60.5653	50.4935	72.36
ENSBTAG00000020125	ENSBTAT00000070015	0.118942	0.0321056	22.1085	21.8024	18.7493	19.6336	18.734	19.3339
ENSBTAG00000010402	ENSBTAT00000013737	-0.00579567	0.439285	357.733	350.528	347.605	351.747	357.267	351.103
ENSBTAG00000000014	ENSBTAT00000000014	-0.268289	0.0135709	35.6186	38.4245	35.8175	41.1524	42.7841	48.3773
ENSBTAG00000008074	ENSBTAT00000075227	0.417136	3.46446e-10	35.5484	33.1287	32.3302	25.9196	23.986	25.7398
ENSBTAG00000000393	ENSBTAT00000000506	0.195761	0.053019	7.05342	6.11636	7.45448	5.56835	6.18444	6.2545
ENSBTAG00000014322	ENSBTAT00000019045	-0.73481	2.17087e-06	1.55659	1.41079	1.09626	2.36065	2.13118	2.27078
ENSBTAG00000014605	ENSBTAT00000083145	-0.356877	4.89145e-05	9.75588	9.69177	9.08827	12.2659	11.9657	12.3129
ENSBTAG00000018828	ENSBTAT00000025063	-0.165981	0.201223	24.3965	28.9965	24.3618	29.6346	28.12	29.4809
ENSBTAG00000016043	ENSBTAT00000082648	-0.175776	0.539511	1.43124	1.18774	1.17293	1.45595	1.59265	1.23465
ENSBTAG00000011111	ENSBTAT00000014754	0.0424424	0.237078	23.8776	25.5249	24.6162	22.4117	23.9589	25.5022
ENSBTAG00000049163	ENSBTAT00000067041	-0.952026	2.18181e-25	11.8172	10.2061	11.6484	20.1775	21.1427	23.8206
ENSBTAG00000007093	ENSBTAT00000009329	-0.606236	0.0443105	0.748793	0.413488	0.443072	0.896748	0.897908	0.649145
ENSBTAG00000005225	ENSBTAT00000055617	0.406318	1.01847e-05	6.7923	6.88797	6.60493	5.4606	4.95955	4.88598
ENSBTAG00000030285	ENSBTAT00000003353	0.0444313	0.421855	4.5621	4.58637	4.14955	4.39383	3.99214	4.50875
ENSBTAG00000009668	ENSBTAT00000012742	0.160002	0.00316267	16.7074	16.8924	15.9988	14.5699	14.9285	14.8936
ENSBTAG00000047582	ENSBTAT00000009931	-0.494314	7.74639e-07	6.73317	6.51998	6.24193	9.04684	8.81548	9.59945
ENSBTAG00000046724	ENSBTAT00000064944	0.453905	1.15717e-07	6.64918	7.03262	6.45611	5.03322	4.67824	4.99051
ENSBTAG00000045469	ENSBTAT00000062902	-inf	1	0	0	0	0.148809	0	0.067361
ENSBTAG00000012481	ENSBTAT00000075094	-0.622258	4.75042e-12	7.15979	7.14069	7.10771	11.2223	10.8934	10.8376
ENSBTAG00000000662	ENSBTAT00000000872	0.0137464	0.355498	5.84336	6.00267	5.94502	5.87748	5.99025	5.7546
ENSBTAG00000019290	ENSBTAT00000075102	-0.374537	3.7453e-05	17.1828	15.5476	16.9781	20.4438	21.2274	22.7721
ENSBTAG00000019290	ENSBTAT00000075102	-0.374537	3.7453e-05	17.1828	15.5476	16.9781	20.4438	21.2274	22.7721
ENSBTAG00000012030	ENSBTAT00000015956	0.0854004	0.178638	7.71196	8.08594	8.17654	7.58225	7.50358	7.51063
ENSBTAG00000001708	ENSBTAT00000002240	-0.0718158	0.851257	20.3679	22.2115	19.054	21.5609	20.9585	22.2597
ENSBTAG00000006273	ENSBTAT00000008234	-0.951351	0.00379953	0.356099	0.405765	0.219278	0.63761	0.413761	0.845847
ENSBTAG00000049395	ENSBTAT00000082286	-0.859957	1	0.0233	0.096214	0.0850593	0.106815	0.211756	0.052726
ENSBTAG00000008065	ENSBTAT00000010609	-0.146367	0.460554	8.95154	9.50622	8.70084	9.2665	9.65343	11.1386
ENSBTAG00000000650	ENSBTAT00000000853	-0.11622	0.586482	1.87184	1.97126	1.96196	2.1198	2.11632	2.05594
ENSBTAG00000014966	ENSBTAT00000067451	0.212809	0.000430931	36.689	37.7327	35.7867	29.8286	31.2118	34.0534
ENSBTAG00000024756	ENSBTAT00000067401	-0.0873983	0.820231	1.63112	1.61922	1.73896	1.79098	1.60263	1.90727
ENSBTAG00000021337	ENSBTAT00000028448	-0.0710166	0.856033	7.51453	7.09586	7.08979	7.04437	7.27343	8.47729
ENSBTAG00000016053	ENSBTAT00000021364	0.973349	3.11439e-27	17.3769	18.7987	17.1737	8.2224	9.36002	9.58958
ENSBTAG00000020705	ENSBTAT00000075980	0.247114	0.210739	0.454668	0.578238	0.416644	0.464123	0.458135	0.299105
ENSBTAG00000016005	ENSBTAT00000021305	-0.219041	0.0204843	28.2492	29.8074	29.2065	34.1132	34.0032	33.4542
ENSBTAG00000011187	ENSBTAT00000071336	-0.496797	6.00722e-09	9.36677	8.92061	9.69896	13.3498	14.066	12.075
ENSBTAG00000014512	ENSBTAT00000019294	-0.337294	0.00106601	5.05156	5.04288	5.3828	6.17027	6.68211	6.70133
ENSBTAG00000020653	ENSBTAT00000027525	-0.0719461	0.820231	42.2177	41.8208	42.9197	46.11	42.3739	44.966
ENSBTAG00000010593	ENSBTAT00000014015	-0.278673	0.00224718	35.9415	37.8171	36.7822	46.8181	45.2663	42.0103
ENSBTAG00000032360	ENSBTAT00000045907	-0.722373	6.94619e-15	19.2866	20.6259	21.5499	34.8554	35.8029	30.7481
ENSBTAG00000015919	ENSBTAT00000076115	-0.960291	1.95812e-15	9.26452	11.4744	9.69801	18.7074	18.9852	21.5285
ENSBTAG00000019633	ENSBTAT00000081620	-0.805849	1.34094e-09	1.25559	1.72115	1.54294	2.60836	2.80674	2.48608
ENSBTAG00000051450	ENSBTAT00000071540	0	1	NA	NA	NA	NA	NA	NA
ENSBTAG00000019847	ENSBTAT00000026443	0.301805	0.00941953	3.13107	3.48797	3.46648	2.64758	2.75055	2.78362
ENSBTAG00000004797	ENSBTAT00000006298	-0.00540959	0.689798	2.62697	2.5969	2.43129	2.41677	2.62194	2.64521
ENSBTAG00000019188	ENSBTAT00000025537	0.075004	0.0860364	13.8114	14.7375	13.9986	12.8141	13.5807	13.9972
ENSBTAG00000031553	ENSBTAT00000070237	0.357026	0.00823517	3.76536	4.87635	4.04348	3.13284	3.67791	3.0935
ENSBTAG00000010945	ENSBTAT00000048781	0.165316	0.00305468	16.4377	17.722	16.8356	15.5738	15.6938	14.2066
ENSBTAG00000007522	ENSBTAT00000077743	-0.107206	0.458039	37.1087	37.5152	38.7343	40.5545	41.8378	39.7103
ENSBTAG00000001839	ENSBTAT00000027443	-0.983713	1.67253e-18	8.43021	7.00778	7.87394	14.1338	16.3807	15.586
ENSBTAG00000004912	ENSBTAT00000006467	-0.00448692	0.464064	16.9332	16.9338	16.43	17.622	17.1201	15.7116
ENSBTAG00000020525	ENSBTAT00000027346	0.0732846	0.134455	69.7171	83.6597	68.876	73.5896	69.1385	68.5169
ENSBTAG00000020525	ENSBTAT00000027346	0.0732846	0.134455	69.7171	83.6597	68.876	73.5896	69.1385	68.5169
ENSBTAG00000046671	ENSBTAT00000082028	-0.463934	9.91157e-06	6.2217	5.66625	5.53512	7.52412	7.90391	8.60356
ENSBTAG00000046671	ENSBTAT00000082028	-0.463934	9.91157e-06	6.2217	5.66625	5.53512	7.52412	7.90391	8.60356
ENSBTAG00000012464	ENSBTAT00000016537	-0.0662909	0.885303	27.4529	27.7887	27.4191	27.3745	29.8003	29.3728
ENSBTAG00000017335	ENSBTAT00000023055	0.118115	1	0.256388	0.198897	0.316102	0.179096	0.290813	0.24084
ENSBTAG00000013996	ENSBTAT00000080424	-0.0112742	0.755632	2.3089	2.45202	2.17853	1.89422	2.55044	2.54924
ENSBTAG00000007986	ENSBTAT00000010497	-0.919394	1.33516e-26	3.75445	3.86258	3.8395	6.93429	7.43705	7.29663
ENSBTAG00000011044	ENSBTAT00000054961	-2.31079	1.53345e-79	1.34478	1.57636	1.76627	7.79015	7.73045	7.73625
ENSBTAG00000017240	ENSBTAT00000022905	0.129094	0.229977	2.29802	1.8196	2.12077	1.85322	1.70711	2.14409
ENSBTAG00000006116	ENSBTAT00000066454	-0.017332	0.637294	10.5964	10.3338	10.2856	10.7579	10.331	10.5043
ENSBTAG00000001762	ENSBTAT00000002309	-0.439281	4.52322e-05	11.8625	11.7537	12.424	15.3664	16.609	16.8925
ENSBTAG00000000813	ENSBTAT00000001076	0.507117	2.77079e-07	18.0756	16.2181	19.6449	11.7859	12.13	14.0368
ENSBTAG00000007741	ENSBTAT00000074594	-1.20423	6.17916e-07	0.605582	0.976023	0.967228	2.01056	1.76749	2.09481
ENSBTAG00000052791	ENSBTAT00000070149	0.0534778	0.154973	29.5921	32.0959	33.5724	30.592	31.1962	30.0057
ENSBTAG00000005312	ENSBTAT00000006986	0.108838	0.329519	2.22011	1.92024	2.09674	1.51657	2.33197	1.93533
ENSBTAG00000005289	ENSBTAT00000006959	-0.136758	0.317902	7.58533	7.37997	7.57044	7.97339	8.4449	8.3582
ENSBTAG00000009990	ENSBTAT00000017060	0.0922515	0.0632116	10.5506	10.2827	10.8392	10.1747	10.4404	9.09563
ENSBTAG00000010450	ENSBTAT00000087048	0.0652856	0.187507	4.51602	4.77305	4.29691	4.6195	4.39927	3.96612
ENSBTAG00000010450	ENSBTAT00000087048	0.0652856	0.187507	4.51602	4.77305	4.29691	4.6195	4.39927	3.96612
ENSBTAG00000002495	ENSBTAT00000069949	-0.0774744	0.782148	19.7301	21.6723	19.6477	21.5133	21.183	21.7218
ENSBTAG00000002495	ENSBTAT00000069949	-0.0774744	0.782148	19.7301	21.6723	19.6477	21.5133	21.183	21.7218
ENSBTAG00000043971	ENSBTAT00000060960	-1.31477	1.24113e-22	0.731063	0.920953	0.910908	2.09718	1.98907	2.28934
ENSBTAG00000016937	ENSBTAT00000081172	0.0827012	0.18037	5.97278	5.93564	5.77775	5.2864	5.29648	6.11797
ENSBTAG00000008854	ENSBTAT00000024311	-0.36525	0.0110134	1.73521	2.07843	1.77364	2.41171	2.43313	2.35215
ENSBTAG00000019325	ENSBTAT00000025736	-0.0264046	0.760205	5.48048	5.25317	5.53088	5.75649	5.37764	5.43082
ENSBTAG00000019329	ENSBTAT00000083272	-0.00186711	0.76683	0.930442	1.12391	0.985749	0.955139	0.991005	1.09789
ENSBTAG00000011825	ENSBTAT00000015695	0.0690033	0.107596	89.8221	89.9774	91.6484	85.6834	80.502	92.5849
ENSBTAG00000011811	ENSBTAT00000036826	0.608643	4.85772e-09	28.3548	29.4815	27.5257	15.8575	23.2681	16.8559
ENSBTAG00000010727	ENSBTAT00000014200	-0.023907	0.79042	4.4315	4.37836	4.90241	4.82135	4.90065	4.21939
ENSBTAG00000037941	ENSBTAT00000056840	-0.0185995	0.741494	11.0443	8.97082	10.1069	10.5275	8.94519	11.0402
ENSBTAG00000012048	ENSBTAT00000015985	-0.313158	0.00127736	19.995	22.4334	21.8253	25.679	26.3753	27.7762
ENSBTAG00000019220	ENSBTAT00000025598	-0.380013	1.20736e-05	24.7318	23.9991	23.3027	30.0895	30.4481	33.2037
ENSBTAG00000008202	ENSBTAT00000071585	-0.494984	4.26226e-10	76.139	76.7128	74.2019	108.993	102.432	108.563
ENSBTAG00000011207	ENSBTAT00000014883	-0.298697	0.00218347	157.606	168.967	159.289	188.819	192.443	216.364
ENSBTAG00000040507	ENSBTAT00000014311	0.233979	0.00119118	4.1113	4.63941	4.46155	3.63366	3.75763	3.84291
ENSBTAG00000046837	ENSBTAT00000066296	0.240751	0.0200619	12.8429	18.7182	13.4377	12.4052	12.4765	13.2011
ENSBTAG00000009178	ENSBTAT00000012094	-0.536616	3.57231e-06	11.2801	12.5966	10.4021	15.2689	16.4489	18.0058
ENSBTAG00000004294	ENSBTAT00000070397	-0.143788	0.30485	7.39796	7.39794	7.07544	7.63189	8.1766	8.355
ENSBTAG00000017291	ENSBTAT00000071276	0.151788	0.0132741	13.559	15.2331	13.5455	12.5896	12.5809	12.939
ENSBTAG00000021018	ENSBTAT00000027991	-0.334258	0.000295625	18.9425	20.5505	20.5043	23.7433	25.3344	26.5626
ENSBTAG00000021018	ENSBTAT00000027991	-0.334258	0.000295625	18.9425	20.5505	20.5043	23.7433	25.3344	26.5626
ENSBTAG00000021016	ENSBTAT00000027988	0.177248	0.00157349	37.7944	38.3328	38.3187	33.3241	32.7063	35.1843
ENSBTAG00000025550	ENSBTAT00000035967	1.20069	1.70394e-05	0.620977	0.872403	0.563327	0.417057	0.215317	0.262434
ENSBTAG00000001795	ENSBTAT00000078879	-0.647735	4.96501e-16	42.3276	43.9917	43.1271	64.9298	66.3781	71.4965
ENSBTAG00000019966	ENSBTAT00000026593	-0.207206	0.191096	4.45822	4.41339	4.09064	4.79915	4.86741	5.29771
ENSBTAG00000006007	ENSBTAT00000007890	-0.121578	0.427175	46.8842	51.8561	45.7912	52.8148	48.9069	55.5176
ENSBTAG00000020117	ENSBTAT00000035866	0.0302121	0.241609	7.7006	7.6243	7.23812	7.25663	7.60437	7.23443
ENSBTAG00000008395	ENSBTAT00000011048	0.398044	9.1416e-06	4.9217	4.96068	4.70462	3.60565	3.67545	3.78878
ENSBTAG00000031363	ENSBTAT00000074330	0.132555	0.0668178	104.344	126.769	101.498	97.306	92.658	113.448
ENSBTAG00000009996	ENSBTAT00000082174	-0.074782	0.822143	6.05666	5.79584	5.85974	6.39149	6.32563	5.93745
ENSBTAG00000025452	ENSBTAT00000035788	0.064166	0.156237	13.9829	14.4666	13.4073	13.2258	12.7987	14.0114
ENSBTAG00000009034	ENSBTAT00000011906	0.120992	0.0201726	43.4118	47.2747	41.2178	39.8303	40.3016	41.1614
ENSBTAG00000009034	ENSBTAT00000011906	0.120992	0.0201726	43.4118	47.2747	41.2178	39.8303	40.3016	41.1614
ENSBTAG00000014526	ENSBTAT00000019309	-0.0515689	0.962126	10.6698	12.1399	10.0879	10.7143	10.7921	12.5884
ENSBTAG00000018049	ENSBTAT00000024029	-0.432614	1.22308e-07	65.2124	60.4129	58.9291	80.5931	85.3314	83.1644
ENSBTAG00000012994	ENSBTAT00000017275	0.121866	0.00691975	387.368	399.244	403.078	358.777	369.318	365.228
ENSBTAG00000043994	ENSBTAT00000061163	-0.292653	0.0243116	4.81534	4.59996	4.2459	5.42806	5.56473	5.74067
ENSBTAG00000011398	ENSBTAT00000015147	0.626648	0.0109202	0.708496	1.0224	1.1505	0.567188	0.65218	0.646854
ENSBTAG00000019646	ENSBTAT00000080042	0.0730065	0.169787	8.56465	8.48152	7.58764	7.49745	7.72685	8.19395
ENSBTAG00000002098	ENSBTAT00000002707	-0.459903	6.42543e-05	11.6999	13.2788	10.8598	16.086	15.0047	18.2033
ENSBTAG00000016648	ENSBTAT00000040082	-0.905864	1.3476e-28	343.825	377.292	347.71	650.262	642.813	709.551
ENSBTAG00000003018	ENSBTAT00000028801	0.319388	7.32115e-08	85.9762	88.1309	88.0722	67.4805	70.1786	72.4539
ENSBTAG00000019771	ENSBTAT00000026348	0.444945	4.70696e-08	11.7323	12.4783	11.0786	8.12826	8.66829	9.12739
ENSBTAG00000008607	ENSBTAT00000011354	-1.03083	1.21158e-22	5.73295	5.97019	5.04636	11.5394	11.04	11.6432
ENSBTAG00000012172	ENSBTAT00000081626	-0.467461	1.89222e-06	7.18811	6.94717	8.12137	9.64059	10.4234	10.7097
ENSBTAG00000007480	ENSBTAT00000004477	-0.166703	0.141111	25.1585	25.6341	26.0872	27.5047	27.9808	30.8114
ENSBTAG00000019419	ENSBTAT00000053067	-0.375698	0.00408305	15.1551	16.0417	13.7293	17.3716	18.5811	22.3374
ENSBTAG00000019714	ENSBTAT00000026274	-0.588771	5.43095e-12	17.395	18.4894	17.7824	25.3331	27.3378	28.0422
ENSBTAG00000045762	ENSBTAT00000065646	0.00509668	0.528336	11.5172	12.2299	10.3926	10.4	11.9789	11.6403
ENSBTAG00000016797	ENSBTAT00000022345	0.304409	8.87542e-06	26.8563	30.6009	27.908	22.3309	22.7978	23.9979
ENSBTAG00000007782	ENSBTAT00000010231	2.25457	1.79401e-190	41.8438	45.2093	45.5263	9.59204	9.46368	8.72758
ENSBTAG00000030529	ENSBTAT00000013264	-0.109556	0.494157	12.1291	12.7103	12.0764	14.175	12.7562	12.8971
ENSBTAG00000010068	ENSBTAT00000070659	0.328114	0.104362	0.587921	0.943123	0.935699	0.692905	0.639335	0.632712
ENSBTAG00000030584	ENSBTAT00000043199	-0.234238	0.0248525	14.6275	16.2118	15.3903	18.3166	18.3401	17.7224
ENSBTAG00000030589	ENSBTAT00000043202	-0.0576749	0.996236	8.89439	9.86519	7.94461	9.70631	8.54284	9.54424
ENSBTAG00000015034	ENSBTAT00000020011	0.0706226	0.0713089	62.0551	60.9897	59.6736	59.7934	56.3515	57.8446
ENSBTAG00000017349	ENSBTAT00000023076	0.0396496	0.160271	22.0157	22.4467	21.4028	21.0652	21.8643	21.1501
ENSBTAG00000017349	ENSBTAT00000023076	0.0396496	0.160271	22.0157	22.4467	21.4028	21.0652	21.8643	21.1501
ENSBTAG00000015224	ENSBTAT00000020259	-0.0237611	0.706658	6.34487	5.89783	5.95053	6.32036	6.49462	5.68037
ENSBTAG00000013744	ENSBTAT00000018267	1.28315	4.59101e-33	4.86741	5.84763	4.59091	2.00834	2.112	2.16882
ENSBTAG00000043553	ENSBTAT00000060554	2.7128	2.46575e-61	7.38488	9.18851	9.26644	1.1553	1.21056	1.57559
ENSBTAG00000013880	ENSBTAT00000019472	-1.35352	1.48677e-56	5.36956	5.44784	5.30995	13.686	13.9588	13.5661
ENSBTAG00000009565	ENSBTAT00000076668	-0.438593	1.64682e-07	16.8508	16.3277	17.9313	23.1937	24.3421	21.7323
ENSBTAG00000000874	ENSBTAT00000079894	0.301989	5.43639e-07	73.6471	74.5747	73.9754	61.7242	63.0866	55.4207
ENSBTAG00000048107	ENSBTAT00000064711	-0.00921333	0.502007	279.831	273.633	284.08	293.95	290.386	258.574
ENSBTAG00000001762	ENSBTAT00000002309	-0.439281	4.52322e-05	11.8625	11.7537	12.424	15.3664	16.609	16.8925
ENSBTAG00000001762	ENSBTAT00000002309	-0.439281	4.52322e-05	11.8625	11.7537	12.424	15.3664	16.609	16.8925
ENSBTAG00000020922	ENSBTAT00000027868	0.147403	0.00442677	19.254	18.3303	18.2037	16.3985	17.0477	16.9233
ENSBTAG00000007739	ENSBTAT00000036534	0.0308125	0.44165	16.9584	15.903	15.0914	13.9713	16.3123	16.6559
ENSBTAG00000007737	ENSBTAT00000010176	-0.061538	0.955862	638.891	754.557	630.609	666.828	632.237	813.195
ENSBTAG00000002566	ENSBTAT00000003320	-0.127215	0.448866	5.01164	5.23857	5.03825	5.46876	6.15965	5.06938
ENSBTAG00000018349	ENSBTAT00000070970	0.334125	3.12326e-05	36.3588	30.634	33.4997	27.9212	27.8581	23.9379
ENSBTAG00000020709	ENSBTAT00000019513	0.0996399	0.159901	3.75883	3.47508	3.44369	3.39994	3.39243	3.17267
ENSBTAG00000016775	ENSBTAT00000055878	-0.140266	0.59773	2.60002	2.3415	1.70032	2.3908	2.38867	2.54056
ENSBTAG00000011135	ENSBTAT00000047416	-0.0987244	0.74066	10.0469	10.7249	9.67822	12.1863	10.6691	9.75131
ENSBTAG00000011125	ENSBTAT00000014779	-0.142371	0.238538	13.5053	14.2048	13.3505	14.4513	15.2933	15.5747
ENSBTAG00000004553	ENSBTAT00000005982	0.200252	0.000516446	1158.95	1084.8	1194.18	1049.05	1034.5	908.804
ENSBTAG00000008841	ENSBTAT00000011642	-0.158968	0.328052	8.39617	9.84108	8.59342	9.78396	9.33936	10.8328
ENSBTAG00000006068	ENSBTAT00000007973	0.207577	0.00102976	9.20847	9.45024	9.36115	8.08888	8.19781	7.97825
ENSBTAG00000002516	ENSBTAT00000003269	0.312482	0.0024103	6.74535	7.46296	8.03775	5.51371	6.23275	6.1673
ENSBTAG00000010179	ENSBTAT00000013440	1.69487	1.34909e-43	3.60818	3.17944	2.83652	0.895435	1.06815	1.00913
ENSBTAG00000015721	ENSBTAT00000020887	-0.463505	9.20127e-06	4.41037	4.06454	4.04311	5.80567	5.56395	5.89133
ENSBTAG00000015721	ENSBTAT00000020887	-0.463505	9.20127e-06	4.41037	4.06454	4.04311	5.80567	5.56395	5.89133
ENSBTAG00000025606	ENSBTAT00000036109	-0.209265	0.0350549	32.6908	30.5348	31.694	37.3026	37.7889	34.6451
ENSBTAG00000009568	ENSBTAT00000012586	0.0253231	0.231892	38.462	37.8911	36.4332	36.5068	37.5866	36.7304
ENSBTAG00000009569	ENSBTAT00000077213	-0.423011	0.000116384	5.02642	5.76209	5.01788	6.50978	6.96056	7.72165
ENSBTAG00000002148	ENSBTAT00000073232	0.0410044	0.259334	9.49525	9.40434	8.56081	8.84436	9.41996	8.42659
ENSBTAG00000014415	ENSBTAT00000019173	-0.271821	0.227352	1.03255	0.952528	0.781273	1.0391	1.17004	1.13076
ENSBTAG00000014415	ENSBTAT00000019173	-0.271821	0.227352	1.03255	0.952528	0.781273	1.0391	1.17004	1.13076
ENSBTAG00000007660	ENSBTAT00000010078	-0.136378	0.602945	5.06903	7.52151	5.24571	6.56552	6.43511	6.60395
ENSBTAG00000007660	ENSBTAT00000010078	-0.136378	0.602945	5.06903	7.52151	5.24571	6.56552	6.43511	6.60395
ENSBTAG00000014207	ENSBTAT00000018887	0.247246	0.00105735	5.87675	6.03653	5.32272	4.93713	4.69163	4.89262
ENSBTAG00000001796	ENSBTAT00000002352	0.294651	0.0132206	2.77418	2.47219	2.72321	2.0565	2.22456	2.2163
ENSBTAG00000015487	ENSBTAT00000020586	0.318561	8.53339e-06	7.37432	7.43485	7.68527	5.72561	6.12471	6.18729
ENSBTAG00000002224	ENSBTAT00000044908	-1.5609	4.72156e-29	1.60109	2.10241	1.58238	5.68024	5.11827	4.79687
ENSBTAG00000053812	ENSBTAT00000080258	-1.47859	3.80281e-14	1.13403	1.65632	1.01456	3.45382	3.74834	3.40117
ENSBTAG00000008520	ENSBTAT00000039403	0.0272985	0.358239	21.3525	24.9443	19.7019	21.6448	22.2396	20.8772
ENSBTAG00000020759	ENSBTAT00000078406	-0.114138	0.428009	16.8236	16.6847	16.4084	17.1794	18.5486	18.2982
ENSBTAG00000012181	ENSBTAT00000085254	-0.0182713	0.611932	20.0968	18.4259	19.3712	18.648	20.214	19.7698
ENSBTAG00000004524	ENSBTAT00000035792	0.0681543	0.157468	10.4159	9.76168	10.4953	9.95917	9.45981	9.83859
ENSBTAG00000015426	ENSBTAT00000020501	-0.160118	0.169169	67.5011	68.3952	70.3776	76.4519	72.1419	81.8922
ENSBTAG00000002882	ENSBTAT00000052423	-2.38956	8.78623e-161	3.58814	3.91091	3.79405	20.7455	19.8993	18.5309
ENSBTAG00000011400	ENSBTAT00000019445	-0.251446	0.00689633	80.5702	85.7773	78.35	96.0226	95.6459	99.6193
ENSBTAG00000011400	ENSBTAT00000084797	-0.251446	0.00689633	80.5702	85.7773	78.35	96.0226	95.6459	99.6193
ENSBTAG00000011400	ENSBTAT00000084797	-0.251446	0.00689633	80.5702	85.7773	78.35	96.0226	95.6459	99.6193
ENSBTAG00000015192	ENSBTAT00000020211	0.283668	0.000418159	5.9918	6.15226	5.50108	5.05373	4.75406	4.68768
ENSBTAG00000015192	ENSBTAT00000020211	0.283668	0.000418159	5.9918	6.15226	5.50108	5.05373	4.75406	4.68768
ENSBTAG00000013628	ENSBTAT00000018115	0.149227	0.217236	1.80919	1.62672	1.78063	1.46	1.76473	1.4792
ENSBTAG00000019646	ENSBTAT00000080042	0.0730065	0.169787	8.56465	8.48152	7.58764	7.49745	7.72685	8.19395
ENSBTAG00000002645	ENSBTAT00000077799	0.0782334	0.0969296	10.6997	10.4735	10.8321	10.387	9.84163	10.0873
ENSBTAG00000019767	ENSBTAT00000026341	-0.0903899	0.728294	5.81667	6.09606	5.5389	6.25354	6.11894	6.20753
ENSBTAG00000014349	ENSBTAT00000067359	-0.201857	0.0898832	17.987	18.711	18.9892	20.5951	20.9979	22.4571
ENSBTAG00000047217	ENSBTAT00000064681	-0.478488	0.00533638	3.92699	3.90152	2.45129	5.1413	4.9556	4.22577
ENSBTAG00000011351	ENSBTAT00000064314	0.165526	0.00793294	50.9083	55.8581	50.9619	44.6667	44.717	51.2474
ENSBTAG00000020780	ENSBTAT00000074450	0.37944	1.23847e-06	8.72524	8.7858	8.27956	6.74274	5.85954	7.22388
ENSBTAG00000046263	ENSBTAT00000065686	0.129154	0.0617017	4.8221	5.48321	5.52694	5.04094	4.69099	4.74456
ENSBTAG00000008695	ENSBTAT00000028599	0.1157	0.0212818	11.6042	11.0505	10.539	9.99881	10.4541	10.1827
ENSBTAG00000005288	ENSBTAT00000006958	2.61795	4.84147e-29	1.74036	2.7496	1.9093	0.401791	0.386115	0.254527
ENSBTAG00000001450	ENSBTAT00000043198	-0.161338	0.433871	3.74892	3.78928	4.01819	4.05886	3.96895	4.89598
ENSBTAG00000030499	ENSBTAT00000023082	0.0666376	0.181365	8.55947	7.43052	8.15918	7.90837	7.14692	8.00381
ENSBTAG00000049273	ENSBTAT00000081575	0.995522	1	0	0.312329	0	0	0.15665	0
ENSBTAG00000014835	ENSBTAT00000075057	0.40075	3.48771e-10	12374.9	13181.1	11824.4	9714.3	9147.65	9452.36
ENSBTAG00000013557	ENSBTAT00000018026	-0.188286	0.0807951	9.3527	9.27688	9.34595	10.8014	10.5081	10.5661
ENSBTAG00000001081	ENSBTAT00000072269	0.0891309	0.0737715	54.1144	57.7221	54.8158	48.6597	50.7719	57.2364
ENSBTAG00000001081	ENSBTAT00000072269	0.0891309	0.0737715	54.1144	57.7221	54.8158	48.6597	50.7719	57.2364
ENSBTAG00000015578	ENSBTAT00000020692	-0.365692	0.0105809	6.82092	7.5583	6.3945	8.31371	8.73994	9.71326
ENSBTAG00000012442	ENSBTAT00000036795	1.03554	1.73252e-58	371.124	351.482	377.791	177.198	181.374	178.237
ENSBTAG00000007872	ENSBTAT00000010356	-0.414869	5.63821e-05	15.111	16.5179	16.2361	23.5023	21.6587	18.6515
ENSBTAG00000043961	ENSBTAT00000061015	-0.313236	0.000232812	7.40596	7.45377	7.59672	9.32704	9.6487	8.92621
ENSBTAG00000045064	ENSBTAT00000062497	0	1	NA	NA	NA	NA	NA	NA
ENSBTAG00000014467	ENSBTAT00000047471	-0.801669	4.57381e-05	2.12341	3.01952	2.5593	4.07527	4.66304	4.68758
ENSBTAG00000000269	ENSBTAT00000000335	-0.223422	0.128489	9.73716	10.2239	9.06938	11.6556	11.9488	10.2886
ENSBTAG00000011406	ENSBTAT00000015161	0.223114	0.00579089	10.1866	12.071	9.98469	9.66748	8.62827	9.32671
ENSBTAG00000011431	ENSBTAT00000075913	-0.0898805	0.700177	10.3958	10.0983	9.19798	10.2342	10.8133	10.5533
ENSBTAG00000011434	ENSBTAT00000080254	0.100106	0.0656747	8.9984	10.3942	10.0123	8.88396	9.12987	9.41991
ENSBTAG00000018922	ENSBTAT00000053555	0.0415531	0.339853	14.9726	15.239	15.5084	16.5811	14.3209	13.52
ENSBTAG00000000917	ENSBTAT00000001218	0.13073	0.00684892	60.1995	62.2666	59.9019	54.4929	55.3643	56.7121
ENSBTAG00000014401	ENSBTAT00000019149	0.384798	1.95565e-09	30.3373	32.1999	29.0544	23.5766	23.2446	23.3276
ENSBTAG00000005469	ENSBTAT00000007194	-0.103175	0.49611	29.9901	29.1228	28.8034	32.5383	31.3347	30.561
ENSBTAG00000012385	ENSBTAT00000045206	0.167276	0.00423632	8.48477	8.08248	8.43513	7.06464	7.58214	7.61839
ENSBTAG00000054773	ENSBTAT00000087064	-0.29716	0.0011038	33.098	34.0597	32.8226	42.7122	42.2505	37.8853
ENSBTAG00000000320	ENSBTAT00000076606	-0.326417	0.000120447	21.9243	21.8145	22.5584	27.7305	27.0264	28.3728
ENSBTAG00000015807	ENSBTAT00000020997	-0.182943	0.231844	10.449	9.3633	9.84316	10.56	10.3391	12.7657
ENSBTAG00000011202	ENSBTAT00000014878	-0.128011	0.566889	6.15776	5.49539	5.66991	6.09287	5.62171	7.21582
ENSBTAG00000012922	ENSBTAT00000017171	0.175876	0.00214562	10.768	11.0995	10.85	10.0055	9.70697	9.24999
ENSBTAG00000015171	ENSBTAT00000020188	0.162729	0.0160992	10.4971	11.7909	10.9031	9.4359	10.0117	10.2032
ENSBTAG00000009516	ENSBTAT00000012521	0.230764	0.000113496	15.8709	15.059	16.4361	14.0131	13.3004	13.051
ENSBTAG00000001926	ENSBTAT00000002506	-0.0853335	0.70524	93.6348	91.0856	90.0521	101.042	102.804	87.6689
ENSBTAG00000051452	ENSBTAT00000082716	-0.258387	1	1.35803	1.78119	1.21779	1.98742	1.89579	1.3284
ENSBTAG00000019915	ENSBTAT00000053931	0.470439	1.16634e-11	108.469	109.047	103.667	74.4691	73.6881	83.655
ENSBTAG00000050986	ENSBTAT00000073028	-0.350138	0.000130604	47.0903	47.0551	44.3732	54.8352	58.7648	62.9673
ENSBTAG00000050986	ENSBTAT00000073028	-0.350138	0.000130604	47.0903	47.0551	44.3732	54.8352	58.7648	62.9673
ENSBTAG00000007494	ENSBTAT00000083498	0.119043	0.0169261	9.46539	9.44057	9.46302	8.44928	9.21037	8.46247
ENSBTAG00000008877	ENSBTAT00000068028	0.638451	3.75272e-11	2.36797	2.53561	2.48054	1.59418	1.49449	1.65491
ENSBTAG00000009789	ENSBTAT00000016160	-0.0590811	0.967898	11.6464	10.7012	12.4297	11.5906	11.5954	13.045
ENSBTAG00000015005	ENSBTAT00000056722	0.059397	0.254992	6.33204	6.41567	6.54405	6.23146	6.46666	5.81551
ENSBTAG00000011388	ENSBTAT00000015136	-0.311094	0.000432202	26.5195	25.4581	26.1838	31.7947	32.0362	33.1399
ENSBTAG00000011394	ENSBTAT00000015139	-0.200732	0.168543	3.89651	4.46099	4.57212	4.67882	5.23192	4.94905
ENSBTAG00000025868	ENSBTAT00000074863	-0.0137076	0.529014	107.988	105.005	103.662	102.811	108.181	108.686
ENSBTAG00000011434	ENSBTAT00000080254	0.100106	0.0656747	8.9984	10.3942	10.0123	8.88396	9.12987	9.41991
ENSBTAG00000005519	ENSBTAT00000086028	-0.0940966	0.659355	6.91478	6.41646	6.74146	7.38099	7.27986	6.76468
ENSBTAG00000009734	ENSBTAT00000012834	0.360668	2.43924e-05	8.34504	7.06906	8.48787	6.6363	6.33369	5.64495
ENSBTAG00000000841	ENSBTAT00000080306	0.452031	9.69284e-10	8.74688	7.58394	8.23688	6.16658	5.7063	6.08644
ENSBTAG00000009504	ENSBTAT00000073453	-0.718251	1.63707e-10	4.82221	4.7758	4.71171	7.73279	7.70634	8.10302
ENSBTAG00000019293	ENSBTAT00000073967	1.01532	0.000596483	0.666099	1.66763	1.81664	0.751482	0.614099	0.687677
ENSBTAG00000006214	ENSBTAT00000008159	-0.100239	0.514832	419.24	407.055	403.169	427.161	433.634	457.13
ENSBTAG00000006214	ENSBTAT00000008159	-0.100239	0.514832	419.24	407.055	403.169	427.161	433.634	457.13
ENSBTAG00000015249	ENSBTAT00000020286	-0.241556	0.00697497	26.9669	26.6748	26.3085	31.7812	32.5439	30.1974
ENSBTAG00000000695	ENSBTAT00000070963	-0.0325866	0.750221	22.9945	25.0528	22.5192	24.641	23.5273	24.0102
ENSBTAG00000031569	ENSBTAT00000044756	0.135364	0.016769	75.1154	82.7931	74.0642	68.9783	67.6618	74.5571
ENSBTAG00000046549	ENSBTAT00000065971	-0.151884	0.176535	13.9904	13.2764	13.5376	14.879	15.5198	14.9356
ENSBTAG00000001939	ENSBTAT00000002523	0.101605	0.0697094	8.46745	8.30615	9.26123	8.25196	8.16744	7.84493
ENSBTAG00000000575	ENSBTAT00000066849	-0.588822	3.8695e-16	708.569	703.358	723.159	1048.62	1085.13	1077.45
ENSBTAG00000000575	ENSBTAT00000066849	-0.588822	3.8695e-16	708.569	703.358	723.159	1048.62	1085.13	1077.45
ENSBTAG00000017803	ENSBTAT00000023671	-0.109197	0.523666	50.547	46.2104	50.8539	52.9312	58.9308	47.3557
ENSBTAG00000038190	ENSBTAT00000053205	-0.0126183	0.651848	13.753	12.3544	13.858	13.9283	14.2078	12.1804
ENSBTAG00000013222	ENSBTAT00000061271	-0.205768	0.0388053	35.1384	31.4921	34.6455	39.5067	40.6123	36.6825
ENSBTAG00000008600	ENSBTAT00000011347	0.494164	3.43877e-08	16.272	19.367	15.7452	12.2712	11.535	12.6752
ENSBTAG00000007288	ENSBTAT00000009583	-0.00373255	0.568969	7.80461	8.75354	8.63026	8.25296	8.38466	8.61605
ENSBTAG00000016281	ENSBTAT00000077452	-0.139415	0.263819	28.9782	30.1719	28.2094	30.8945	31.6237	33.7046
ENSBTAG00000001644	ENSBTAT00000002157	-0.0965792	0.569642	5.40414	4.85135	5.45816	5.56455	5.67273	5.5643
ENSBTAG00000047037	ENSBTAT00000065410	-inf	1	0	0	0	0	0.313299	0.169489
ENSBTAG00000003764	ENSBTAT00000004897	0.1127	0.0240061	26.698	25.4595	24.1985	23.4526	24.0841	23.0816
ENSBTAG00000008159	ENSBTAT00000010726	1.60082	1	0.299668	0.552715	0.342725	0.137191	0.0387494	0.218074
ENSBTAG00000009784	ENSBTAT00000012905	-0.0643624	0.920372	19.8521	21.0901	20.7723	20.5291	21.627	22.3741
ENSBTAG00000051913	ENSBTAT00000068674	-0.246912	0.0650462	5.24647	5.83141	5.24131	6.94058	6.33338	6.09145
ENSBTAG00000031917	ENSBTAT00000068799	-0.0692192	0.881215	10.5292	9.67501	9.298	10.9289	10.7127	9.31068
ENSBTAG00000002728	ENSBTAT00000003537	0.0420297	0.220923	6.29332	6.35025	6.3554	5.89769	6.11744	6.43834
ENSBTAG00000005083	ENSBTAT00000045051	0.527092	4.18112e-11	6.02295	5.98017	5.5347	4.00393	4.15041	4.01606
ENSBTAG00000011593	ENSBTAT00000069603	-0.0146591	0.610361	118.843	126.029	120.141	117.556	116.782	134.402
ENSBTAG00000000918	ENSBTAT00000001212	0.376103	0.00164794	3.1478	2.6405	3.21338	2.52396	2.14345	2.26853
ENSBTAG00000009355	ENSBTAT00000012314	1.24368	2.4412e-53	17.7729	17.689	16.4219	7.20286	7.31357	7.39378
ENSBTAG00000033803	ENSBTAT00000017593	-0.971833	0.000449565	2.49711	3.02775	1.34009	4.57406	4.61193	4.27844
ENSBTAG00000047338	ENSBTAT00000063169	-0.666579	2.16819e-13	8.81292	8.5025	9.02267	13.8597	14.7407	13.2062
ENSBTAG00000015615	ENSBTAT00000020742	-0.161077	1	0.082638	0.076206	0.049644	0.057448	0.104277	0.07139
ENSBTAG00000006367	ENSBTAT00000008357	0.728666	1.0095e-24	1229.89	1363.1	1446.54	816.598	793.094	828.006
ENSBTAG00000000245	ENSBTAT00000084104	0.070244	0.122196	5.15539	5.74628	5.36304	4.89837	5.273	5.32039
ENSBTAG00000010347	ENSBTAT00000067802	0.0150642	0.294653	243.838	263.315	252.363	248.583	255.414	247.629
ENSBTAG00000000625	ENSBTAT00000081089	-1.39583	1.67602e-22	1.42148	1.52186	1.68081	4.45629	3.73354	3.97813
ENSBTAG00000019734	ENSBTAT00000026300	0.192606	0.00286156	14.9719	15.816	14.701	12.8067	12.5903	14.4068
ENSBTAG00000010235	ENSBTAT00000047185	-0.190933	0.192388	7.06011	6.23778	7.47592	8.4229	7.7532	7.53725
ENSBTAG00000002715	ENSBTAT00000003519	-0.204426	0.152516	12.7545	11.495	11.3819	14.8242	12.4132	13.8181
ENSBTAG00000038733	ENSBTAT00000053024	0.312585	8.52407e-05	8.74331	9.20532	8.47604	7.20829	7.00904	7.05975
ENSBTAG00000038733	ENSBTAT00000053024	0.312585	8.52407e-05	8.74331	9.20532	8.47604	7.20829	7.00904	7.05975
ENSBTAG00000011571	ENSBTAT00000067715	-0.0810091	0.72406	35.0242	35.7812	34.1949	37.6208	35.4879	37.9561
ENSBTAG00000011571	ENSBTAT00000067715	-0.0810091	0.72406	35.0242	35.7812	34.1949	37.6208	35.4879	37.9561
ENSBTAG00000011349	ENSBTAT00000015083	-0.624265	0.0126859	0.409845	0.497987	0.622822	0.635931	0.935851	0.787607
ENSBTAG00000038333	ENSBTAT00000082396	0.174855	0.00632679	10.5622	10.5507	11.111	9.42939	9.24143	9.87498
ENSBTAG00000020422	ENSBTAT00000027215	0.020088	0.284698	11.8549	11.6616	10.9261	11.3896	11.3404	11.2363
ENSBTAG00000021008	ENSBTAT00000027974	0.860241	6.59341e-10	3.72524	3.33158	3.34053	2.13361	1.83974	1.75414
ENSBTAG00000046189	ENSBTAT00000064229	1.36853	1.78372e-08	1.37275	1.23294	1.10665	0.314945	0.610847	0.511949
ENSBTAG00000002748	ENSBTAT00000003561	0.370083	1.68341e-05	15.4791	15.999	15.2943	12.3576	10.852	12.9799
ENSBTAG00000044029	ENSBTAT00000080415	0.0503258	0.178899	17.0321	17.418	16.1738	16.959	16.2879	15.6415
ENSBTAG00000010371	ENSBTAT00000013689	-0.360943	0.00191672	12.1641	14.6836	14.1469	16.9455	16.9848	18.7176
ENSBTAG00000013032	ENSBTAT00000017326	0.14835	0.0101777	27.0171	24.506	29.3232	24.3048	24.9789	23.6624
ENSBTAG00000001468	ENSBTAT00000001925	-0.362847	6.55219e-05	18.5791	18.3731	19.0834	25.1673	25.4174	21.475
ENSBTAG00000001468	ENSBTAT00000077964	-0.362847	6.55219e-05	18.5791	18.3731	19.0834	25.1673	25.4174	21.475
ENSBTAG00000007809	ENSBTAT00000010271	-0.00318548	0.780665	1.50944	1.43256	1.54397	1.69957	1.43443	1.36189
ENSBTAG00000009998	ENSBTAT00000013186	-0.0636802	0.922211	21.633	23.5984	22.3117	22.3739	23.503	24.7143
ENSBTAG00000015805	ENSBTAT00000035650	0.610047	1.57638e-14	5.32425	5.81358	5.71298	3.51493	3.79757	3.72773
ENSBTAG00000017177	ENSBTAT00000022826	-0.0876688	0.660063	37.0149	37.4367	39.1919	42.544	39.2199	38.9996
ENSBTAG00000020379	ENSBTAT00000043122	-0.158621	0.249395	7.28297	7.36364	6.66862	8.09227	7.64446	8.05576
ENSBTAG00000025403	ENSBTAT00000035678	-0.105729	0.60417	4.26809	4.26677	4.23275	4.92312	4.33218	4.48314
ENSBTAG00000020471	ENSBTAT00000064189	0.891407	0.000230801	0.542898	0.492841	0.328908	0.25706	0.270975	0.20763
ENSBTAG00000030453	ENSBTAT00000086942	-0.137525	0.265446	22.4025	24.0609	23.4882	25.8952	24.7276	26.3251
ENSBTAG00000044071	ENSBTAT00000061359	-0.776444	0.000243519	0.597765	0.466203	0.570074	0.837525	0.890911	1.07052
ENSBTAG00000008341	ENSBTAT00000010988	0.189873	0.000361821	38.0568	38.6056	38.8147	34.3546	35.0134	31.8687
ENSBTAG00000012352	ENSBTAT00000086668	-0.00174477	0.787923	2.96534	5.11671	5.15134	3.24398	5.2639	4.74153
ENSBTAG00000012352	ENSBTAT00000086668	-0.00174477	0.787923	2.96534	5.11671	5.15134	3.24398	5.2639	4.74153
ENSBTAG00000006440	ENSBTAT00000008442	0.461446	1.17013e-10	10.7548	10.904	9.60729	7.34565	7.81548	7.54612
ENSBTAG00000015580	ENSBTAT00000037963	-0.172105	0.223859	12.0451	12.0808	9.967	12.1614	12.6769	13.5742
ENSBTAG00000001601	ENSBTAT00000047412	-0.0239664	0.697924	840.667	945.248	834.335	865.745	840.229	958.168
ENSBTAG00000006366	ENSBTAT00000083379	0.776111	1.19502e-26	9.91192	10.0811	10.2559	6.04283	5.72443	5.89623
ENSBTAG00000002715	ENSBTAT00000003519	-0.204426	0.152516	12.7545	11.495	11.3819	14.8242	12.4132	13.8181
ENSBTAG00000007097	ENSBTAT00000009334	0.260026	0.019853	5.17482	4.79926	4.67301	3.82126	3.5575	4.85262
ENSBTAG00000016378	ENSBTAT00000073812	0.235505	0.000416222	31.8634	35.7164	29.9471	27.6268	27.0081	28.2033
ENSBTAG00000016658	ENSBTAT00000022154	0.592251	2.12096e-11	24.2691	27.9746	24.2749	15.7564	16.0045	18.9944
ENSBTAG00000015146	ENSBTAT00000020149	0.101755	0.0282498	32.9805	32.9274	35.0523	32.9918	31.0326	30.0603
ENSBTAG00000025664	ENSBTAT00000036230	-3.03481	1	0.160833	0.056897	0	0.60339	0.548476	0.632517
ENSBTAG00000020100	ENSBTAT00000035838	-0.712859	0.000701164	5.37753	4.41588	5.42328	9.80673	10.2103	4.9239
ENSBTAG00000006792	ENSBTAT00000008933	-0.431887	2.47462e-06	6.3528	6.36265	6.17127	8.69958	8.87766	7.9009
ENSBTAG00000032055	ENSBTAT00000006949	0.222754	0.000113604	14.1658	13.1715	13.7282	11.951	11.9226	11.3167
ENSBTAG00000005373	ENSBTAT00000072971	0.246079	1.84261e-05	904.93	816.653	921.047	767.929	748.598	711.698
ENSBTAG00000040590	ENSBTAT00000055852	0.806642	1.52417e-05	12.4296	11.4957	15.7633	7.74571	7.77255	7.1722
ENSBTAG00000014181	ENSBTAT00000018858	-0.107812	0.533679	9.23778	9.21442	8.49405	9.75527	10.3132	8.96863
ENSBTAG00000018255	ENSBTAT00000024301	-0.0103681	0.494264	368.507	375.026	373.538	370.715	369.753	384.66
ENSBTAG00000018255	ENSBTAT00000024301	-0.0103681	0.494264	368.507	375.026	373.538	370.715	369.753	384.66
ENSBTAG00000011683	ENSBTAT00000070493	0.0696382	0.131267	18.8904	22.5561	20.7558	19.0267	20.622	19.6225
ENSBTAG00000009272	ENSBTAT00000012216	0.112563	0.0424804	8.93692	9.60901	9.2295	8.69192	8.22243	8.77636
ENSBTAG00000006688	ENSBTAT00000083480	-0.566415	0.00742464	0.687688	1.00686	0.8425	1.4607	1.12482	1.17145
ENSBTAG00000012004	ENSBTAT00000015925	-0.844158	1.84233e-22	6.82904	6.58579	6.70671	12.3724	12.1044	11.6457
ENSBTAG00000020480	ENSBTAT00000027289	-0.0672422	0.878384	35.9279	36.3291	36.2426	37.3581	35.8318	40.4865
ENSBTAG00000008083	ENSBTAT00000010628	-0.29505	0.000660661	66.6645	65.9635	66.7848	83.0849	85.8941	75.6861
ENSBTAG00000004497	ENSBTAT00000073869	0.207452	0.00435806	6.54395	6.39353	6.4061	5.22887	5.40476	6.11917
ENSBTAG00000013023	ENSBTAT00000079740	-0.699101	1.63174e-20	59.2534	59.9697	59.1291	95.1393	94.5392	99.8751
ENSBTAG00000013023	ENSBTAT00000006458	-0.699101	1.63174e-20	59.2534	59.9697	59.1291	95.1393	94.5392	99.8751
ENSBTAG00000016606	ENSBTAT00000022090	0.139276	0.155477	7.85967	7.82716	7.23083	6.71258	6.71089	7.38518
ENSBTAG00000000489	ENSBTAT00000000617	-0.120299	0.677429	3.74693	3.88906	3.27922	4.13831	3.66449	4.0616
ENSBTAG00000004887	ENSBTAT00000006430	0.0636286	0.114555	28.1144	28.4986	27.5505	25.2098	26.5836	28.7389
ENSBTAG00000002105	ENSBTAT00000047005	0.00537062	0.398891	23.47	24.5394	23.7061	24.7431	22.8142	23.8917
ENSBTAG00000004073	ENSBTAT00000069606	-0.349745	0.000450061	9.03907	8.59838	8.94406	11.5437	10.9079	11.4221
ENSBTAG00000003711	ENSBTAT00000004836	0.270945	8.83659e-07	58.6774	57.5045	58.0028	47.891	49.5012	46.968
ENSBTAG00000007808	ENSBTAT00000061292	0.794985	6.5433e-30	37.4846	40.8525	37.1262	22.8758	21.9707	21.7007
ENSBTAG00000019983	ENSBTAT00000026618	0.113669	0.0222436	13.4555	12.8884	12.7091	12.2804	12.5409	11.2728
ENSBTAG00000019983	ENSBTAT00000069775	0.113669	0.0222436	13.4555	12.8884	12.7091	12.2804	12.5409	11.2728
ENSBTAG00000018705	ENSBTAT00000066809	-0.212912	0.0636794	8.66903	8.95962	8.80555	10.1962	9.29517	11.1465
ENSBTAG00000015014	ENSBTAT00000032953	-1.32462	4.32242e-16	1.98315	1.67647	1.79476	4.5767	5.08866	3.99606
ENSBTAG00000023172	ENSBTAT00000029334	0.0891635	0.14588	5.1839	5.22616	5.30021	5.09628	5.09888	4.57356
ENSBTAG00000015490	ENSBTAT00000086892	0.186477	0.00412067	12.6466	13.979	12.0881	10.9789	11.2642	11.7766
ENSBTAG00000020575	ENSBTAT00000044045	-0.030409	0.930816	1.41969	1.692	1.71949	1.57316	1.8586	1.50235
ENSBTAG00000008232	ENSBTAT00000068743	0.195802	0.00444826	3.2448	3.50658	3.15533	2.80097	3.03625	2.81219
ENSBTAG00000012844	ENSBTAT00000017067	-0.327409	0.0113518	4.14325	4.30407	4.44938	5.08051	4.99855	6.10318
ENSBTAG00000008994	ENSBTAT00000032762	0.102645	0.206221	2.86701	2.80351	3.0039	2.38979	2.67039	3.01853
ENSBTAG00000014150	ENSBTAT00000018807	0.47709	1.96173e-10	94.3426	95.8163	87.1233	66.0455	62.0407	71.1204
ENSBTAG00000011307	ENSBTAT00000032743	0.291139	0.000579418	8.34014	8.78527	8.40764	6.88192	6.20078	7.78437
ENSBTAG00000030567	ENSBTAT00000068517	-0.261891	0.0065828	12.4254	13.0851	11.916	15.2202	14.9056	14.7504
ENSBTAG00000015327	ENSBTAT00000066436	0.366501	3.19211e-10	89.9948	89.8783	89.3575	67.7252	70.8582	70.2484
ENSBTAG00000038831	ENSBTAT00000055396	0.50067	1.66276e-07	9.63894	9.90232	10.1471	7.15283	7.02778	6.80247
ENSBTAG00000010653	ENSBTAT00000014090	-0.149953	0.409352	3.62673	3.10905	3.26946	3.53618	3.5969	3.96806
ENSBTAG00000013072	ENSBTAT00000017383	0.121797	0.0144756	16.2816	16.2568	17.4436	15.5919	15.3664	14.9774
ENSBTAG00000021896	ENSBTAT00000029190	0.0532832	0.150967	6.98005	7.41876	7.06058	7.17181	7.08569	6.42379
ENSBTAG00000050491	ENSBTAT00000059342	-0.459149	1	1.2855	1.32195	2.12104	1.91794	2.66486	1.91759
ENSBTAG00000021373	ENSBTAT00000028493	-0.0987291	0.68555	6.12733	6.19225	6.35391	6.83827	5.97249	7.18536
ENSBTAG00000018799	ENSBTAT00000066046	-0.0888327	0.647479	25.3956	25.5118	27.0649	26.6559	27.3644	28.904
ENSBTAG00000018799	ENSBTAT00000025023	-0.0888327	0.647479	25.3956	25.5118	27.0649	26.6559	27.3644	28.904
ENSBTAG00000015097	ENSBTAT00000020090	0.116028	0.110974	7.42755	7.58474	7.52955	6.98915	6.38362	7.42714
ENSBTAG00000052600	ENSBTAT00000061530	-1.13344	7.53066e-10	1.56946	1.51138	1.20011	3.18089	2.57433	3.63636
ENSBTAG00000052909	ENSBTAT00000069052	0.674005	0.000283659	1.37628	1.26063	1.36803	0.985276	0.648158	0.876718
ENSBTAG00000015074	ENSBTAT00000077876	0.419366	0.00149351	6.07829	6.03002	5.4777	4.2889	4.87032	3.99077
ENSBTAG00000048054	ENSBTAT00000065653	0.63565	7.04492e-15	6.23755	6.02537	5.96388	3.68633	3.84247	4.20289
ENSBTAG00000047061	ENSBTAT00000066145	0.199649	0.0292309	4.72273	4.52423	4.93522	3.67763	4.61254	4.05913
ENSBTAG00000021861	ENSBTAT00000029144	-0.183298	0.133238	13.0744	14.0279	13.2761	15.1525	14.3479	16.3483
ENSBTAG00000021861	ENSBTAT00000029144	-0.183298	0.133238	13.0744	14.0279	13.2761	15.1525	14.3479	16.3483
ENSBTAG00000012147	ENSBTAT00000032616	0.0723071	0.226852	8.44507	8.80669	8.28654	7.84918	7.52898	8.91172
ENSBTAG00000012148	ENSBTAT00000078972	-0.136625	0.276726	9.31142	8.74406	8.84539	9.51868	9.96651	10.0878
ENSBTAG00000021920	ENSBTAT00000029225	-0.468077	0.000237067	3.46332	3.70761	3.37713	4.25326	5.00829	5.32922
ENSBTAG00000006744	ENSBTAT00000008872	-0.00320541	0.472814	21.3013	20.4609	20.9719	20.7321	22.7792	19.3624
ENSBTAG00000006744	ENSBTAT00000008872	-0.00320541	0.472814	21.3013	20.4609	20.9719	20.7321	22.7792	19.3624
ENSBTAG00000000489	ENSBTAT00000000617	-0.120299	0.677429	3.74693	3.88906	3.27922	4.13831	3.66449	4.0616
ENSBTAG00000008764	ENSBTAT00000011544	0.252274	0.000129315	13.4144	13.3039	13.4772	11.3844	11.0434	11.3192
ENSBTAG00000009021	ENSBTAT00000011880	-0.20306	0.0669048	19.4575	20.2926	19.1849	23.6049	23.1679	21.0694
ENSBTAG00000017500	ENSBTAT00000023260	0.790363	1.34092e-05	1.70253	1.50329	1.55146	0.882766	0.870349	0.997539
ENSBTAG00000005432	ENSBTAT00000007150	-0.117333	0.478543	36.4683	39.429	35.3418	38.0897	38.1102	44.4643
ENSBTAG00000010111	ENSBTAT00000013336	-0.448188	7.74086e-05	7.63151	8.46379	6.90757	9.91561	10.701	10.7667
ENSBTAG00000049341	ENSBTAT00000067035	-0.412249	4.95667e-06	7.93881	7.62101	8.03906	10.6544	11.1981	9.55182
ENSBTAG00000001662	ENSBTAT00000044505	-0.182452	0.232992	5.31278	5.20374	4.5807	5.88552	5.2898	5.95718
ENSBTAG00000019515	ENSBTAT00000025998	-0.237904	0.0259396	28.6748	31.923	28.0705	34.0493	34.2516	36.2638
ENSBTAG00000007077	ENSBTAT00000009303	-0.139234	0.507452	1.75218	1.4292	1.73315	1.7766	1.9662	1.66968
ENSBTAG00000013403	ENSBTAT00000079929	-0.716491	2.5397e-12	5.99179	5.14164	5.47919	9.61563	9.43492	8.24697
ENSBTAG00000008884	ENSBTAT00000011696	0.441714	9.13006e-10	20.6653	20.1395	20.2981	14.4458	15.1962	15.3456
ENSBTAG00000018761	ENSBTAT00000024978	-0.0344484	0.787006	14.4801	14.8851	14.6197	14.294	14.6766	16.0772
ENSBTAG00000004259	ENSBTAT00000075837	0.0191999	0.457318	5.10021	5.2003	5.26142	4.91036	5.22599	5.21985
ENSBTAG00000046218	ENSBTAT00000066246	0.988806	5.41125e-26	10.4687	9.45145	9.72522	4.72719	5.74045	4.47051
ENSBTAG00000011810	ENSBTAT00000015677	0.998416	1.20743e-35	111.152	118.803	101.393	54.2066	52.5776	59.072
ENSBTAG00000008997	ENSBTAT00000011846	0.0221865	0.367692	22.5718	25.7027	21.4018	23.3589	21.6105	23.6435
ENSBTAG00000044129	ENSBTAT00000061027	0.222173	0.00131988	18.0002	17.9919	17.082	13.8225	15.267	16.4096
ENSBTAG00000044129	ENSBTAT00000061027	0.222173	0.00131988	18.0002	17.9919	17.082	13.8225	15.267	16.4096
ENSBTAG00000046548	ENSBTAT00000063122	-0.131532	0.412491	12.6379	13.4442	12.4267	13.843	13.5721	14.7695
ENSBTAG00000012274	ENSBTAT00000016302	0.0736512	0.0920187	15.7951	16.2666	16.5081	15.2947	15.1335	15.7243
ENSBTAG00000011317	ENSBTAT00000084718	-0.0929956	0.590715	41.5983	42.2635	40.373	44.6289	44.2992	43.5786
ENSBTAG00000010626	ENSBTAT00000072113	0.279365	0.000586386	11.8015	12.5907	10.8918	8.97232	9.78442	10.3156
ENSBTAG00000001932	ENSBTAT00000079641	-0.0724052	0.847145	22.2323	24.3372	21.5132	23.3912	22.8604	25.3352
ENSBTAG00000020490	ENSBTAT00000027302	-0.328093	0.0746	2.00358	1.81969	1.7024	2.18649	2.16165	2.58853
ENSBTAG00000006572	ENSBTAT00000008634	0.153352	1	0.117647	0.140862	0.26431	0.239715	0.155175	0.0752065
ENSBTAG00000000054	ENSBTAT00000000060	0.231873	0.0273631	2.69145	2.98185	2.8016	2.82173	2.38624	2.00865
ENSBTAG00000000054	ENSBTAT00000000060	0.231873	0.0273631	2.69145	2.98185	2.8016	2.82173	2.38624	2.00865
ENSBTAG00000001352	ENSBTAT00000055628	0.0739644	0.0786376	20.7741	21.5247	22.0642	19.9456	20.4118	20.789
ENSBTAG00000048781	ENSBTAT00000075230	-0.0234536	0.689829	90.1193	82.5055	93.8293	86.2403	88.0169	96.564
ENSBTAG00000016148	ENSBTAT00000021490	0.383668	1	0.822339	0.555685	0.49448	0.605207	0.489579	0.340463
ENSBTAG00000047958	ENSBTAT00000064726	0.81791	1.0604e-24	28.4162	28.8344	28.0191	14.7008	16.488	17.1816
ENSBTAG00000046223	ENSBTAT00000064659	0.0240695	0.476041	5.09527	5.92523	4.87668	4.64499	5.42474	5.56445
ENSBTAG00000046415	ENSBTAT00000066088	-0.279791	0.10616	11.8405	9.84513	11.149	12.9042	11.5202	15.4375
ENSBTAG00000030247	ENSBTAT00000074438	0.085715	0.21655	5.26192	6.11915	5.47632	4.93918	5.00031	5.94552
ENSBTAG00000003109	ENSBTAT00000004044	-0.158625	0.153922	198.869	196.989	190.373	228.424	223.081	202.86
ENSBTAG00000013159	ENSBTAT00000017493	-0.367802	0.000599971	6.99268	6.71815	6.77273	8.99072	8.8278	8.61317
ENSBTAG00000010949	ENSBTAT00000014539	0.143492	0.0338527	4.40726	4.78938	4.34167	4.12296	4.18388	3.94972
ENSBTAG00000053984	ENSBTAT00000054446	-0.056152	0.990773	51.9736	47.1397	55.0363	47.4486	55.5071	57.312
ENSBTAG00000018577	ENSBTAT00000019060	-0.156432	0.194344	19.2574	18.049	19.9223	21.1531	22.4791	20.1508
ENSBTAG00000008888	ENSBTAT00000011704	-0.145318	0.294278	13.208	11.8957	11.8815	13.5305	13.7398	13.6344
ENSBTAG00000003934	ENSBTAT00000005134	0.0821713	0.0845056	25.6504	25.7906	27.6286	23.3242	24.8965	26.4713
ENSBTAG00000002129	ENSBTAT00000002751	1.5397	9.34431e-77	31.6268	34.7235	28.9636	10.8151	11.461	10.5078
ENSBTAG00000002129	ENSBTAT00000002751	1.5397	9.34431e-77	31.6268	34.7235	28.9636	10.8151	11.461	10.5078
ENSBTAG00000010693	ENSBTAT00000074700	0.110716	0.0162268	136.661	141.719	133.593	130.805	131.163	119.57
ENSBTAG00000010129	ENSBTAT00000013364	-0.604304	1	0.163542	0.137191	0.262699	0.207978	0.359877	0.2887
ENSBTAG00000011466	ENSBTAT00000015238	0.116749	0.0716914	13.819	12.3804	14.5281	11.4967	12.6014	13.4634
ENSBTAG00000020726	ENSBTAT00000079985	-0.0897814	0.729711	4.47758	3.81881	4.40453	4.10082	5.00302	4.41257
ENSBTAG00000044275	ENSBTAT00000061708	0.565504	1	0.277538	0.58713	0.697855	0.336124	0.484521	0.235182
ENSBTAG00000016109	ENSBTAT00000021443	0.824619	1.37507e-08	2.72043	3.18347	2.6009	1.5712	1.56978	1.6611
ENSBTAG00000016737	ENSBTAT00000022252	-0.293042	0.00841842	14.465	14.7204	13.5437	18.6068	16.6688	17.0769
ENSBTAG00000032234	ENSBTAT00000026195	-0.0918616	0.672926	14.959	15.2383	15.6868	16.4927	17.8462	14.5618
ENSBTAG00000012849	ENSBTAT00000035335	0.470546	6.98392e-15	271.323	258.361	259.647	182.642	198.226	188.786
ENSBTAG00000012849	ENSBTAT00000035335	0.470546	6.98392e-15	271.323	258.361	259.647	182.642	198.226	188.786
ENSBTAG00000011471	ENSBTAT00000078522	-0.14679	0.389488	3.79741	4.67114	4.3342	4.74122	4.68555	4.74722
ENSBTAG00000018671	ENSBTAT00000024848	0.896508	0.000211364	1.87014	1.21561	1.9352	0.637245	1.09974	0.960201
ENSBTAG00000050526	ENSBTAT00000070314	0.17256	0.438934	0.772367	0.978842	0.900533	1.0964	0.814968	0.441437
ENSBTAG00000014991	ENSBTAT00000069687	0.246692	1.05701e-05	12.0744	12.1582	12.2928	10.3373	10.1865	10.2608
ENSBTAG00000015910	ENSBTAT00000021156	-0.0122054	0.537676	557.869	523.121	581.436	574.527	582.391	519.632
ENSBTAG00000015584	ENSBTAT00000020705	0.321857	6.26135e-06	10.6495	9.7104	10.7484	8.33742	8.89945	7.65098
ENSBTAG00000018395	ENSBTAT00000061384	-0.358532	3.76303e-05	7.00324	6.70294	6.51149	8.65598	8.66732	8.59818
ENSBTAG00000007678	ENSBTAT00000010101	0.455629	1.05e-10	21.8484	19.6338	22.325	15.8128	16.3361	14.3788
ENSBTAG00000004625	ENSBTAT00000006069	0.19877	0.00137759	9.65144	9.98457	9.87603	8.3804	8.41287	8.92038
ENSBTAG00000013899	ENSBTAT00000071330	0.207109	0.000308954	8.03474	8.33312	8.0463	7.25761	7.06429	6.8274
ENSBTAG00000013160	ENSBTAT00000066172	0.330127	0.199055	1.00839	0.919376	0.523513	0.670299	0.821054	0.458559
ENSBTAG00000015379	ENSBTAT00000072232	0.227099	0.0139845	3.58502	3.4718	3.51379	2.89117	3.42468	2.71516
ENSBTAG00000003863	ENSBTAT00000005039	0.063449	0.246707	9.19905	10.3038	9.42587	9.41266	8.98216	9.28916
ENSBTAG00000007497	ENSBTAT00000009858	0.0799501	0.127651	25.3375	21.2447	24.7298	21.6193	22.1092	23.7392
ENSBTAG00000014769	ENSBTAT00000019648	0.000112393	0.59462	4.91096	4.74408	4.93507	4.6141	4.55678	5.41809
ENSBTAG00000006002	ENSBTAT00000007879	0.0156985	0.382782	4.85084	4.47644	4.571	4.36573	4.54294	4.83919
ENSBTAG00000047991	ENSBTAT00000039328	0.061182	0.277551	3.20841	3.50138	3.18416	3.1575	3.11622	3.20943
ENSBTAG00000054628	ENSBTAT00000081045	1.12331	6.4068e-44	27.6408	30.2341	26.3186	12.3395	14.1422	12.1665
ENSBTAG00000006533	ENSBTAT00000008580	-0.19557	0.0680649	44.4925	42.5365	42.9716	49.8338	46.4702	52.5696
ENSBTAG00000008840	ENSBTAT00000011640	-0.016403	0.610942	47.3935	54.5094	47.4367	50.9006	49.5048	50.6417
ENSBTAG00000031402	ENSBTAT00000083553	-0.00633616	0.470308	10.9457	10.6306	10.8261	10.9079	11.1328	10.5043
ENSBTAG00000005969	ENSBTAT00000007832	-0.273069	0.00200362	96.6076	93.5489	100.866	123.447	114.465	113.752
ENSBTAG00000006135	ENSBTAT00000008072	0.146891	0.0647759	22.4445	29.1891	23.708	21.0987	22.7534	24.196
ENSBTAG00000005504	ENSBTAT00000007235	-0.109276	0.629433	8.24109	10.0212	8.2102	9.46988	9.07739	10.0083
ENSBTAG00000006021	ENSBTAT00000007911	0.160273	0.0570583	2.04405	2.06329	1.8842	1.8962	1.592	1.87336
ENSBTAG00000006021	ENSBTAT00000007911	0.160273	0.0570583	2.04405	2.06329	1.8842	1.8962	1.592	1.87336
ENSBTAG00000006021	ENSBTAT00000007911	0.160273	0.0570583	2.04405	2.06329	1.8842	1.8962	1.592	1.87336
ENSBTAG00000006670	ENSBTAT00000008782	0.0822628	0.104499	47.6545	48.2483	46.1209	43.1416	41.2847	49.7257
ENSBTAG00000005571	ENSBTAT00000007321	-0.00906186	0.629805	9.79607	9.0744	9.84637	10.2723	10.3563	8.26915
ENSBTAG00000001640	ENSBTAT00000070030	-0.0800977	0.796102	4.83934	4.51222	5.11382	4.93404	5.24687	5.1103
ENSBTAG00000052551	ENSBTAT00000083160	-0.493192	0.0433081	1.56078	1.83822	1.63545	2.49823	2.88672	1.70132
ENSBTAG00000009165	ENSBTAT00000012081	0.242658	0.0035606	4.59952	4.62226	4.29117	3.89829	3.8264	3.69627
ENSBTAG00000008527	ENSBTAT00000011240	0.0276136	0.254531	55.615	54.6157	60.2609	57.4358	58.1057	51.7178
ENSBTAG00000000559	ENSBTAT00000000732	-0.130191	0.617439	1.78114	1.91675	1.69764	1.95087	1.94889	2.00533
ENSBTAG00000007489	ENSBTAT00000085616	-0.117458	0.378206	15.1927	14.9406	15.1262	15.8318	16.4464	16.8204
ENSBTAG00000006671	ENSBTAT00000057089	0.109858	0.0298899	24.8381	27.583	26.2362	25.1414	24.4966	23.2521
ENSBTAG00000014554	ENSBTAT00000019345	-1.60932	2.70329e-39	2.46253	2.15032	2.37929	7.26349	6.58786	7.48221
ENSBTAG00000014554	ENSBTAT00000019345	-1.60932	2.70329e-39	2.46253	2.15032	2.37929	7.26349	6.58786	7.48221
ENSBTAG00000021951	ENSBTAT00000029268	-0.268951	0.00311219	34.2724	34.0411	37.6222	43.8518	42.1969	41.5966
ENSBTAG00000020800	ENSBTAT00000027718	0.39569	1.28792e-05	8.22408	7.57561	9.50481	6.84288	6.66822	5.7235
ENSBTAG00000007703	ENSBTAT00000050460	0.042246	0.258953	7.83122	7.56066	8.30489	7.86763	7.89016	7.25513
ENSBTAG00000015438	ENSBTAT00000069983	0.114094	0.01561	163.431	165.547	159.09	146.886	146.054	158.017
ENSBTAG00000001420	ENSBTAT00000070340	-0.051674	0.97626	14.1216	13.1921	14.3811	14.3423	12.7211	16.152
ENSBTAG00000002683	ENSBTAT00000071148	-0.330818	0.00218032	18.8904	20.8108	17.9727	23.2103	22.6544	26.6732
ENSBTAG00000001112	ENSBTAT00000001472	-0.0633498	0.962689	2.94746	2.75829	2.66094	2.52978	2.76906	3.44343
ENSBTAG00000001320	ENSBTAT00000001744	0.144025	0.0251884	9.02972	9.57237	8.68641	8.48939	7.95533	8.25111
ENSBTAG00000037757	ENSBTAT00000077139	0.158748	0.105613	2.6619	2.66797	3.06261	2.51308	2.31857	2.68636
ENSBTAG00000015796	ENSBTAT00000070817	-0.0834546	0.69892	12.7397	12.9099	13.2777	13.7316	13.6771	13.8369
ENSBTAG00000021232	ENSBTAT00000081888	0.141434	0.0407598	32.9797	32.4522	37.0441	32.2214	26.6891	33.9959
ENSBTAG00000031800	ENSBTAT00000055432	0.543086	8.24375e-11	185.361	224.045	193.275	134.658	129.087	149.876
ENSBTAG00000018783	ENSBTAT00000025006	0.00428128	0.453283	21.1347	23.6716	20.9226	22.0247	21.2645	22.245
ENSBTAG00000017007	ENSBTAT00000022616	-0.200858	0.0616759	29.8534	31.6126	33.5937	34.7939	36.4654	38.0006
ENSBTAG00000027387	ENSBTAT00000039305	-1.03719	1	0.0627355	0.0981534	0.0657705	0.191985	0.123074	0.150097
ENSBTAG00000027386	ENSBTAT00000039303	-0.930497	0.000114558	3.24584	4.01285	2.77304	4.67177	6.11779	8.33023
ENSBTAG00000054678	ENSBTAT00000072892	-0.0763215	0.906001	2.5665	2.55881	2.621	3.02265	2.86207	2.28242
ENSBTAG00000003946	ENSBTAT00000005154	-0.119386	1	0.368946	0.466276	0.35609	0.475549	0.459791	0.35875
ENSBTAG00000005969	ENSBTAT00000007832	-0.273069	0.00200362	96.6076	93.5489	100.866	123.447	114.465	113.752
ENSBTAG00000007930	ENSBTAT00000010424	0.0326176	0.238735	9.01658	9.3646	8.45408	8.67896	8.98029	8.57611
ENSBTAG00000007930	ENSBTAT00000010424	0.0326176	0.238735	9.01658	9.3646	8.45408	8.67896	8.98029	8.57611
ENSBTAG00000007930	ENSBTAT00000010424	0.0326176	0.238735	9.01658	9.3646	8.45408	8.67896	8.98029	8.57611
ENSBTAG00000016208	ENSBTAT00000021569	0.378603	0.000102067	4.05066	4.33239	3.44259	3.02149	3.05866	3.01592
ENSBTAG00000020371	ENSBTAT00000027152	0.0100459	0.579198	5.77076	5.46389	5.63948	5.02185	6.22927	5.50592
ENSBTAG00000000559	ENSBTAT00000000732	-0.130191	0.617439	1.78114	1.91675	1.69764	1.95087	1.94889	2.00533
ENSBTAG00000014186	ENSBTAT00000018862	-0.0491311	0.94352	14.898	13.9023	13.9806	14.1066	14.1952	15.961
ENSBTAG00000001512	ENSBTAT00000001981	-0.197501	0.13017	7.49557	7.77389	7.10177	8.40123	8.25156	9.00054
ENSBTAG00000030556	ENSBTAT00000043137	-0.570246	1.0795e-05	2.07814	2.38385	2.34158	3.2369	3.45737	3.40753
ENSBTAG00000026320	ENSBTAT00000054515	-0.141933	0.300222	34.9273	38.086	36.0119	39.6423	37.9894	42.6649
ENSBTAG00000000856	ENSBTAT00000001141	-0.47384	0.00482985	2.68315	2.75066	2.52722	3.90525	3.36473	3.7863
ENSBTAG00000012235	ENSBTAT00000049670	-0.011928	0.75364	4.53527	4.70974	4.75842	4.8313	3.96571	5.32267
ENSBTAG00000017281	ENSBTAT00000066795	0.0488299	0.272659	4.73638	4.85302	5.33649	4.56158	4.81373	5.05386
ENSBTAG00000009677	ENSBTAT00000012765	-0.414114	0.097525	1.16746	1.07854	0.683409	1.24426	1.43193	1.22718
ENSBTAG00000011922	ENSBTAT00000075231	0.322918	5.20849e-07	33.7897	32.185	32.8686	24.1109	27.0796	27.8298
ENSBTAG00000011922	ENSBTAT00000075231	0.322918	5.20849e-07	33.7897	32.185	32.8686	24.1109	27.0796	27.8298
ENSBTAG00000034691	ENSBTAT00000082106	0.32246	0.000644416	11.9154	12.1731	11.9108	9.06228	8.73098	10.9956
ENSBTAG00000016810	ENSBTAT00000022364	-0.158228	0.246783	25.1565	26.4293	27.5414	27.2406	28.8856	32.1731
ENSBTAG00000021472	ENSBTAT00000028621	0.161303	0.101797	3.02692	2.91637	2.63805	2.70625	2.49956	2.46777
ENSBTAG00000009974	ENSBTAT00000013156	0.513295	0.0244503	0.468092	0.503155	0.712979	0.46397	0.274353	0.44168
ENSBTAG00000009138	ENSBTAT00000012043	-0.181572	0.140648	7.31719	7.12836	7.1139	8.50649	8.67799	7.2665
ENSBTAG00000009138	ENSBTAT00000072395	-0.181572	0.140648	7.31719	7.12836	7.1139	8.50649	8.67799	7.2665
ENSBTAG00000008629	ENSBTAT00000075414	0.162246	0.00494673	34.5685	33.2344	35.0241	33.1723	30.7309	27.9864
ENSBTAG00000020143	ENSBTAT00000026830	-0.46434	2.97767e-06	16.4631	15.5571	15.0841	22.253	22.5265	20.2097
ENSBTAG00000033268	ENSBTAT00000061595	0.0379851	0.222725	4.93814	5.53628	5.45631	5.07734	5.29713	5.14229
ENSBTAG00000046358	ENSBTAT00000064237	-0.558091	3.13739e-10	264.242	278.849	265.101	416.939	422.28	350.696
ENSBTAG00000016278	ENSBTAT00000069699	-0.580181	3.16935e-09	190.338	179.623	195.136	262.482	262.22	320.138
ENSBTAG00000006877	ENSBTAT00000061368	0.0200613	0.385752	7.22092	7.40698	7.70579	7.04123	7.74133	7.24271
ENSBTAG00000007835	ENSBTAT00000010309	-0.288303	0.414858	0.363506	0.233079	0.355822	0.300399	0.442517	0.420166
ENSBTAG00000007753	ENSBTAT00000010194	0.684777	2.83314e-09	3.19879	2.99436	2.87209	1.97223	1.86961	1.79766
ENSBTAG00000008355	ENSBTAT00000011004	-0.175851	0.15193	8.34613	7.81278	8.13439	8.40902	9.3311	9.70233
ENSBTAG00000020751	ENSBTAT00000027654	0.018952	0.453558	14.0374	13.22	11.9383	11.2486	14.7288	12.7067
ENSBTAG00000039705	ENSBTAT00000020019	0.0600999	0.216248	7.41526	8.09021	7.70967	7.54056	7.40106	7.32629
ENSBTAG00000012232	ENSBTAT00000016224	-0.383337	0.000128981	36.7481	36.9574	35.0622	44.1487	45.3909	52.3322
ENSBTAG00000014610	ENSBTAT00000019453	0.0844014	0.0850202	25.8154	26.1781	25.9941	25.4392	22.3349	25.7819
ENSBTAG00000000312	ENSBTAT00000084417	0.635559	3.09417e-11	17.1799	20.643	17.874	11.8495	10.7031	13.2991
ENSBTAG00000019864	ENSBTAT00000026467	2.10861	1	0.20358	0.146489	0.135374	0.0546034	0	0.0579563
ENSBTAG00000000707	ENSBTAT00000000946	1.2707	1.60674e-77	37.6377	35.7146	37.3282	14.7371	15.8457	15.2898
ENSBTAG00000032591	ENSBTAT00000013555	-0.190347	0.0945412	120.7	119.415	127.434	143.921	151.678	123.789
ENSBTAG00000017901	ENSBTAT00000023791	-0.863061	0.0181505	0.394041	0.387479	0.133006	0.589472	0.626521	0.447432
ENSBTAG00000000440	ENSBTAT00000000561	0.691525	1.479e-13	23.8046	22.2203	21.7912	12.6386	14.0183	15.3347
ENSBTAG00000014137	ENSBTAT00000018792	0.0149787	0.475212	2.54487	2.66964	2.8519	2.75978	2.57433	2.64899
ENSBTAG00000016197	ENSBTAT00000079193	0.681605	2.01012e-20	12.7629	14.0621	12.92	7.93163	8.1141	8.73413
ENSBTAG00000017932	ENSBTAT00000023847	-0.0311332	0.895425	3.34487	2.83453	2.89063	3.26308	3.66042	2.34438
ENSBTAG00000040569	ENSBTAT00000016601	-0.346784	0.00834707	3.2897	2.97733	2.8727	3.66718	4.21908	3.73693
ENSBTAG00000006322	ENSBTAT00000008297	-0.234002	0.0156265	22.6406	24.6925	23.2592	28.7983	27.6699	26.5549
ENSBTAG00000001917	ENSBTAT00000002494	-0.288465	0.309339	0.697717	0.908446	0.785742	0.780328	1.02764	1.11336
ENSBTAG00000005356	ENSBTAT00000082276	-0.297721	0.000377197	25.7195	26.3113	25.5902	32.1396	32.2039	31.0683
ENSBTAG00000020890	ENSBTAT00000027831	-0.281506	0.333009	0.349938	0.403332	0.356545	0.572009	0.351494	0.425436
ENSBTAG00000015405	ENSBTAT00000020475	0.153634	0.00725485	14.9758	13.9015	13.6354	11.8279	12.8395	13.5509
ENSBTAG00000000694	ENSBTAT00000000926	-0.15463	0.480911	39.5927	54.2983	40.968	47.8475	42.41	59.859
ENSBTAG00000003566	ENSBTAT00000004638	-0.268951	0.0169477	12.1426	12.9127	11.7409	14.2039	14.0365	16.0965
ENSBTAG00000003565	ENSBTAT00000004636	0.218767	0.0257024	5.5633	5.92005	5.18966	4.11029	4.86371	5.35311
ENSBTAG00000015655	ENSBTAT00000020791	-0.258918	0.0312759	6.11696	5.38692	5.92961	6.39356	7.08706	7.37998
ENSBTAG00000012505	ENSBTAT00000061460	-0.129297	0.297613	10.8909	11.1677	10.6696	11.7102	11.9943	12.0923
ENSBTAG00000027612	ENSBTAT00000039760	-0.136631	0.340781	23.3253	26.36	24.2875	26.9027	26.6989	27.7193
ENSBTAG00000005620	ENSBTAT00000003962	-0.488585	1.34212e-08	841.174	873.962	837.621	1199.04	1106.54	1276.12
ENSBTAG00000031299	ENSBTAT00000019253	-0.0669948	0.878983	11.817	11.9656	13.0757	12.7491	13.0046	12.8567
ENSBTAG00000008465	ENSBTAT00000074334	0.489325	6.25326e-08	3.64232	3.61045	4.01562	2.7062	2.5698	2.75113
ENSBTAG00000003199	ENSBTAT00000085203	-0.045953	0.933654	2.46123	3.10372	2.89242	2.73732	2.8903	3.10347
ENSBTAG00000006143	ENSBTAT00000008081	-0.290116	0.00326311	103.537	107.265	94.45	115.849	128.406	128.989
ENSBTAG00000017325	ENSBTAT00000023036	0.475737	1.56252e-09	10.2682	11.3773	10.6876	7.09924	7.95678	8.19471
ENSBTAG00000021700	ENSBTAT00000028927	0.0399989	0.364338	1.93699	1.85906	1.88876	1.729	1.93654	1.86383
ENSBTAG00000012621	ENSBTAT00000016755	-0.854922	1	0	0.054121	0.061496	0.059624	0.061263	0.088225
ENSBTAG00000012936	ENSBTAT00000017187	0.0979178	0.116362	23.9596	24.5206	23.3474	20.8529	21.0676	25.1938
ENSBTAG00000004423	ENSBTAT00000005797	-0.238008	0.103908	4.60715	3.76675	5.01154	5.42253	5.45689	4.90686
ENSBTAG00000015119	ENSBTAT00000020116	-0.0933633	0.616412	10.8813	11.098	10.5554	11.2374	11.9525	11.5199
ENSBTAG00000009749	ENSBTAT00000012857	-0.0397785	0.918877	0.542452	0.627807	0.684096	0.638522	0.629097	0.638576
ENSBTAG00000019627	ENSBTAT00000026146	-0.00823566	0.583568	73.994	80.8274	72.1873	73.5151	70.831	83.9622
ENSBTAG00000019627	ENSBTAT00000026146	-0.00823566	0.583568	73.994	80.8274	72.1873	73.5151	70.831	83.9622
ENSBTAG00000019627	ENSBTAT00000026146	-0.00823566	0.583568	73.994	80.8274	72.1873	73.5151	70.831	83.9622
ENSBTAG00000016684	ENSBTAT00000022184	-0.00696918	0.771245	1.45016	1.31111	1.24752	1.10578	1.6596	1.26283
ENSBTAG00000002216	ENSBTAT00000002868	-1.31261	2.05214e-57	24.2205	24.0061	26.1333	57.8249	61.1904	65.6876
ENSBTAG00000014855	ENSBTAT00000010779	-0.332719	0.000127539	20.4563	21.8249	19.9526	25.8266	25.8922	26.6576
ENSBTAG00000014855	ENSBTAT00000010779	-0.332719	0.000127539	20.4563	21.8249	19.9526	25.8266	25.8922	26.6576
ENSBTAG00000014855	ENSBTAT00000010779	-0.332719	0.000127539	20.4563	21.8249	19.9526	25.8266	25.8922	26.6576
ENSBTAG00000027716	ENSBTAT00000039940	-0.0199338	1	1.23371	0.801328	0.89474	1.15547	0.65719	1.15789
ENSBTAG00000015628	ENSBTAT00000020758	0.610174	7.49406e-18	24.5357	22.4263	23.7144	14.7447	16.2609	15.2959
ENSBTAG00000015628	ENSBTAT00000020758	0.610174	7.49406e-18	24.5357	22.4263	23.7144	14.7447	16.2609	15.2959
ENSBTAG00000013109	ENSBTAT00000068376	-0.0963372	0.630671	9.62233	9.58408	8.53605	9.70943	9.88689	10.0619
ENSBTAG00000013109	ENSBTAT00000068376	-0.0963372	0.630671	9.62233	9.58408	8.53605	9.70943	9.88689	10.0619
ENSBTAG00000008433	ENSBTAT00000011097	-0.15915	0.407193	8.82873	11.112	8.89553	11.5631	9.1394	11.497
ENSBTAG00000008433	ENSBTAT00000011097	-0.15915	0.407193	8.82873	11.112	8.89553	11.5631	9.1394	11.497
ENSBTAG00000010820	ENSBTAT00000014355	-0.363682	0.0337684	2.41368	2.13325	2.28261	2.94933	3.11716	2.72112
ENSBTAG00000019045	ENSBTAT00000025346	-0.10888	0.581199	16.4917	17.4344	16.1813	16.903	17.5277	19.6047
ENSBTAG00000003721	ENSBTAT00000004844	-0.621013	2.24028e-05	3.54968	3.14825	2.79663	4.88195	4.4813	5.23894
ENSBTAG00000003126	ENSBTAT00000004065	0.212863	0.0243357	7.53405	8.13869	7.96673	6.72741	6.65182	7.01746
ENSBTAG00000004282	ENSBTAT00000066367	-0.0451109	0.897869	5.21748	5.46909	5.52805	5.61143	5.51199	5.60621
ENSBTAG00000016501	ENSBTAT00000043933	0.286655	0.000209614	18.5748	22.8006	18.6611	15.9131	16.9625	16.3424
ENSBTAG00000021744	ENSBTAT00000028983	-0.263887	0.0172033	58.4474	58.6859	60.5826	67.0384	65.6412	80.7056
ENSBTAG00000051215	ENSBTAT00000080355	0.0291068	0.592986	1.41355	1.5692	1.34418	1.56909	1.24787	1.42356
ENSBTAG00000020911	ENSBTAT00000027858	0.00779731	0.383643	18.7245	19.0578	19.9315	19.5322	18.9817	18.8887
ENSBTAG00000020332	ENSBTAT00000027095	-0.0666227	0.896018	11.1033	11.5559	10.9765	11.1886	11.7939	12.2429
ENSBTAG00000005913	ENSBTAT00000007768	0.393737	3.55053e-10	18.9401	18.8633	18.1142	14.6285	13.7271	14.2064
ENSBTAG00000017834	ENSBTAT00000023709	-0.758271	1.68033e-15	9.92933	11.6625	9.88845	17.6572	17.1954	18.3951
ENSBTAG00000008132	ENSBTAT00000010692	-0.202433	0.504737	0.971248	1.19179	0.973678	1.07679	1.10488	1.42755
ENSBTAG00000001483	ENSBTAT00000023881	-0.0962772	0.613481	7.09423	6.92518	6.80122	7.82242	7.68769	6.74738
ENSBTAG00000014560	ENSBTAT00000019352	0.226899	1	0.261411	0.364428	0.437822	0.21064	0.320775	0.377451
ENSBTAG00000000140	ENSBTAT00000067592	0.187445	0.11536	1.18006	1.58259	1.53841	1.21858	1.41618	1.14225
ENSBTAG00000024561	ENSBTAT00000034186	-0.360763	0.00107906	156.33	156.381	160.286	216.299	223.239	167.84
ENSBTAG00000019388	ENSBTAT00000025834	0.0499365	0.270715	15.1375	16.4963	15.3201	14.4992	13.8614	16.996
ENSBTAG00000013275	ENSBTAT00000082052	0.117392	0.25371	2.98853	3.11076	2.99847	3.09296	2.43832	2.85551
ENSBTAG00000005304	ENSBTAT00000006978	-0.220741	0.0676288	27.0295	29.4182	26.4575	33.0458	29.4085	34.1577
ENSBTAG00000019818	ENSBTAT00000068068	1.86726	2.25317e-34	1.48948	1.52294	1.4475	0.392817	0.348657	0.48096
ENSBTAG00000019818	ENSBTAT00000068068	1.86726	2.25317e-34	1.48948	1.52294	1.4475	0.392817	0.348657	0.48096
ENSBTAG00000011823	ENSBTAT00000045695	0.128147	0.0173855	33.3911	32.4396	32.2717	28.9207	28.4929	32.3507
ENSBTAG00000018272	ENSBTAT00000024320	0.382344	3.43049e-07	7.78944	9.08824	8.58962	6.48364	6.42674	6.62788
ENSBTAG00000018272	ENSBTAT00000024320	0.382344	3.43049e-07	7.78944	9.08824	8.58962	6.48364	6.42674	6.62788
ENSBTAG00000011217	ENSBTAT00000014899	-0.102404	0.52016	20.0351	19.4922	19.3552	21.7807	20.7553	20.678
ENSBTAG00000000215	ENSBTAT00000045065	-0.11651	0.382763	119.346	123.901	116.185	130.813	129.705	129.146
ENSBTAG00000010737	ENSBTAT00000014227	-0.0605436	0.950285	19.5662	20.2278	19.8298	21.2398	20.1647	20.7747
ENSBTAG00000010737	ENSBTAT00000071661	-0.0605436	0.950285	19.5662	20.2278	19.8298	21.2398	20.1647	20.7747
ENSBTAG00000002575	ENSBTAT00000003331	0.00303746	0.445404	44.6041	42.4656	41.7222	42.9996	42.2304	43.291
ENSBTAG00000012247	ENSBTAT00000016252	0.442471	1.28896e-12	95.1709	100.494	95.2793	73.2776	69.8606	70.9601
ENSBTAG00000009856	ENSBTAT00000069824	0.0152044	0.434768	7.38852	7.92099	7.31445	7.3975	7.01352	7.97576
ENSBTAG00000009856	ENSBTAT00000069824	0.0152044	0.434768	7.38852	7.92099	7.31445	7.3975	7.01352	7.97576
ENSBTAG00000015635	ENSBTAT00000020764	0.44269	1	0.191945	0.182059	0.222641	0.180731	0.210399	0.0478581
ENSBTAG00000015635	ENSBTAT00000020764	0.44269	1	0.191945	0.182059	0.222641	0.180731	0.210399	0.0478581
ENSBTAG00000015635	ENSBTAT00000020764	0.44269	1	0.191945	0.182059	0.222641	0.180731	0.210399	0.0478581
ENSBTAG00000008739	ENSBTAT00000011517	-1.72446	2.10672e-46	2.14509	2.13679	2.31466	7.10469	7.42424	7.26981
ENSBTAG00000015537	ENSBTAT00000079900	0.286083	1.83574e-06	8.48609	8.25958	8.26603	6.9164	6.86118	6.73516
ENSBTAG00000008003	ENSBTAT00000033964	0.0587778	0.110166	13.1987	14.1171	13.3262	13.14	13.4475	12.4319
ENSBTAG00000008003	ENSBTAT00000033964	0.0587778	0.110166	13.1987	14.1171	13.3262	13.14	13.4475	12.4319
ENSBTAG00000021553	ENSBTAT00000071157	0.703009	1.27715e-23	11.7434	11.6183	10.8413	6.96738	6.87997	7.16319
ENSBTAG00000008153	ENSBTAT00000010723	0.106997	0.0217234	22.4659	20.8043	23.1759	20.4654	21.4734	19.7577
ENSBTAG00000016057	ENSBTAT00000021369	-0.331018	0.00297629	213.807	244.93	210.352	274.699	256.319	310.628
ENSBTAG00000045789	ENSBTAT00000064811	1.15185	2.36251e-49	284.646	305.487	292.328	130.526	122.711	143.913
ENSBTAG00000014912	ENSBTAT00000019854	0.824468	1.09809e-30	344.11	373.144	327.097	198.123	189.54	202.072
ENSBTAG00000004641	ENSBTAT00000063732	-0.0619979	0.959618	1.34892	1.55726	1.68553	1.50512	1.65984	1.62837
ENSBTAG00000020989	ENSBTAT00000027951	0.438324	1	0.352607	0.215473	0.286246	0.192244	0.184341	0.253901
ENSBTAG00000012781	ENSBTAT00000082457	0.347321	2.0338e-07	9.90911	10.4001	9.79792	8.11417	7.91278	7.63851
ENSBTAG00000011785	ENSBTAT00000034200	0.0321314	0.187087	58.7157	57.288	58.0501	56.0178	58.1152	56.0872
ENSBTAG00000000140	ENSBTAT00000067592	0.187445	0.11536	1.18006	1.58259	1.53841	1.21858	1.41618	1.14225
ENSBTAG00000019556	ENSBTAT00000081655	0.194236	0.0527366	3.79437	3.4181	3.48406	3.43939	3.18306	2.72671
ENSBTAG00000009384	ENSBTAT00000012348	0.102893	0.0759015	14.6073	16.0726	15.2338	14.0607	13.4575	15.235
ENSBTAG00000004246	ENSBTAT00000075807	0.480915	0.00046059	2.45935	3.02441	2.66549	2.00593	1.71983	2.11337
ENSBTAG00000008125	ENSBTAT00000070526	-0.753888	6.6781e-05	1.06934	1.21941	1.32111	2.07692	2.10641	1.90408
ENSBTAG00000001727	ENSBTAT00000002262	0.147408	0.0242272	36.6993	37.0354	39.5934	31.0353	35.1202	36.1651
ENSBTAG00000010732	ENSBTAT00000014210	0.37323	2.60119e-05	26.8611	32.7004	28.4298	20.7302	21.9687	25.2349
ENSBTAG00000010720	ENSBTAT00000079241	-0.0510292	0.973122	6.62873	6.66657	6.72801	6.61048	6.14021	7.99354
ENSBTAG00000013813	ENSBTAT00000076507	0.149425	0.287475	0.935488	0.748332	1.16959	0.882563	0.86758	0.822518
ENSBTAG00000018729	ENSBTAT00000024930	-0.0619303	0.939636	7.31166	6.61468	6.88047	7.00171	7.74524	6.97248
ENSBTAG00000018729	ENSBTAT00000024930	-0.0619303	0.939636	7.31166	6.61468	6.88047	7.00171	7.74524	6.97248
ENSBTAG00000018723	ENSBTAT00000024921	0.39302	0.0257534	0.789084	0.675186	0.80662	0.599105	0.552401	0.577854
ENSBTAG00000003701	ENSBTAT00000061152	-0.54263	2.46599e-11	36.576	33.0925	34.4176	50.7265	51.4879	49.4
ENSBTAG00000000754	ENSBTAT00000038491	-0.0594569	0.972448	13.6219	13.0556	13.0716	14.3314	14.2956	12.7944
ENSBTAG00000002291	ENSBTAT00000064034	0.231412	0.00673572	6.05269	5.7902	6.29067	4.79094	5.60636	5.04888
ENSBTAG00000011772	ENSBTAT00000065424	-0.013279	0.780519	2.26463	1.72762	2.21799	2.07484	2.14974	2.0431
ENSBTAG00000050933	ENSBTAT00000072136	0.615462	1.6162e-11	19.5229	23.7955	19.8046	13.4892	13.3733	14.3391
ENSBTAG00000054727	ENSBTAT00000075798	-0.220582	0.329701	3.68799	3.37348	2.95493	3.47175	4.13624	4.06316
ENSBTAG00000021919	ENSBTAT00000029223	-0.404664	0.000479535	4.72344	5.41736	4.90965	5.99537	6.76544	7.16269
ENSBTAG00000007953	ENSBTAT00000010457	0.220256	0.00186418	6.58934	7.13684	7.48239	6.20723	6.11915	5.87934
ENSBTAG00000009755	ENSBTAT00000012863	0.115674	0.0157513	18.3545	17.1795	17.7556	17.0319	16.8216	15.3301
ENSBTAG00000024603	ENSBTAT00000071732	-0.65433	3.10526e-13	14.6186	16.7197	14.884	22.7683	24.3946	25.5858
ENSBTAG00000024603	ENSBTAT00000071732	-0.65433	3.10526e-13	14.6186	16.7197	14.884	22.7683	24.3946	25.5858
ENSBTAG00000043935	ENSBTAT00000060927	-0.976342	1	0.133632	0	0	0	0.140239	0.122678
ENSBTAG00000008061	ENSBTAT00000071542	0.315303	2.15358e-06	21.3661	22.3455	20.0203	16.4964	17.1828	17.541
ENSBTAG00000002328	ENSBTAT00000086208	-0.137574	0.46376	2.28064	2.28998	2.32247	2.52592	2.42254	2.63431
ENSBTAG00000003092	ENSBTAT00000077093	0.374271	4.72122e-07	12.4257	11.2066	12.3078	9.5717	9.22114	8.93474
ENSBTAG00000009101	ENSBTAT00000071818	-0.553781	5.07169e-06	3.83805	3.90784	4.4465	5.40205	6.14795	6.34755
ENSBTAG00000008963	ENSBTAT00000061505	-1.55097	9.04615e-41	1.34859	1.48704	1.18302	3.81143	4.17909	3.78472
ENSBTAG00000021706	ENSBTAT00000028930	-0.00722578	0.728936	2.35942	2.68789	3.3265	2.8364	3.07224	2.50721
ENSBTAG00000015767	ENSBTAT00000020937	-0.261299	0.00214275	72.8897	70.7771	70.437	86.9286	86.1236	83.5636
ENSBTAG00000015767	ENSBTAT00000020937	-0.261299	0.00214275	72.8897	70.7771	70.437	86.9286	86.1236	83.5636
ENSBTAG00000020050	ENSBTAT00000026715	-0.420528	2.98893e-05	22.9972	23.8955	22.3382	27.8946	32.1421	32.6233
ENSBTAG00000006506	ENSBTAT00000077130	0.132228	0.0107955	17.7124	17.7371	17.5044	16.2525	16.9189	15.1448
ENSBTAG00000012504	ENSBTAT00000016592	0.161838	0.0180314	9.69402	10.9341	9.37548	8.84519	9.16	8.81457
ENSBTAG00000013147	ENSBTAT00000029508	-1.10085	3.48207e-08	0.408782	0.494099	0.415558	0.972162	0.868679	0.986951
ENSBTAG00000013147	ENSBTAT00000029508	-1.10085	3.48207e-08	0.408782	0.494099	0.415558	0.972162	0.868679	0.986951
ENSBTAG00000013153	ENSBTAT00000017489	0.1766	0.000692487	19.236	18.7367	19.3041	16.6998	17.499	16.479
ENSBTAG00000013153	ENSBTAT00000017489	0.1766	0.000692487	19.236	18.7367	19.3041	16.6998	17.499	16.479
ENSBTAG00000002770	ENSBTAT00000029446	0.444402	9.11824e-11	21.744	23.5544	20.7476	16.2718	15.8814	16.3832
ENSBTAG00000002385	ENSBTAT00000003082	0.820062	1.11002e-06	2.13054	1.78542	1.90941	1.07154	1.21409	1.01397
ENSBTAG00000003100	ENSBTAT00000085236	-0.880007	5.58175e-22	15.4495	16.031	14.1093	26.7126	26.7142	30.4761
ENSBTAG00000031134	ENSBTAT00000044059	0.194152	0.000966375	105.766	117.091	104.841	97.6515	92.3067	96.4786
ENSBTAG00000006108	ENSBTAT00000008025	-0.830027	5.65821e-06	2.4508	2.34458	2.08576	3.77446	3.68907	4.76922
ENSBTAG00000022027	ENSBTAT00000070094	-0.548225	1.54537e-06	17.552	16.3195	16.2584	23.8624	24.4841	24.9579
ENSBTAG00000053372	ENSBTAT00000085993	-0.0370797	0.855195	4.10614	4.46053	4.10677	4.41613	3.96387	4.6234
ENSBTAG00000053372	ENSBTAT00000085993	-0.0370797	0.855195	4.10614	4.46053	4.10677	4.41613	3.96387	4.6234
ENSBTAG00000010312	ENSBTAT00000013623	0.0285087	0.275565	46.308	49.9571	46.2483	45.6184	44.6557	49.4509
ENSBTAG00000002130	ENSBTAT00000029373	-0.175197	0.153652	8.23577	8.5754	8.72203	9.3344	9.50361	9.992
ENSBTAG00000019375	ENSBTAT00000025815	0.253118	7.9176e-05	24.4593	26.9635	23.3693	21.0864	21.4914	20.1788
ENSBTAG00000019375	ENSBTAT00000025815	0.253118	7.9176e-05	24.4593	26.9635	23.3693	21.0864	21.4914	20.1788
ENSBTAG00000004286	ENSBTAT00000043910	-1.45551	1.78658e-21	1.72355	1.65332	1.24383	4.13628	4.11953	4.41663
ENSBTAG00000008320	ENSBTAT00000079805	-0.237774	0.0169857	21.4659	23.2054	20.6865	26.4643	25.0595	25.5443
ENSBTAG00000019516	ENSBTAT00000083043	0.2728	0.00124397	12.0371	13.0044	11.7425	9.03839	9.80013	11.608
ENSBTAG00000019869	ENSBTAT00000026474	0.219117	0.000826224	8.75043	8.55619	8.87919	7.10489	7.90388	7.48723
ENSBTAG00000002835	ENSBTAT00000070766	0.145401	0.00440439	19.0383	19.0651	19.37	17.9952	17.2628	16.7054
ENSBTAG00000039766	ENSBTAT00000056742	0.0488256	0.291987	3.55478	4.12667	3.67383	3.49916	3.57309	3.90516
ENSBTAG00000039766	ENSBTAT00000056742	0.0488256	0.291987	3.55478	4.12667	3.67383	3.49916	3.57309	3.90516
ENSBTAG00000039766	ENSBTAT00000056742	0.0488256	0.291987	3.55478	4.12667	3.67383	3.49916	3.57309	3.90516
ENSBTAG00000039766	ENSBTAT00000056742	0.0488256	0.291987	3.55478	4.12667	3.67383	3.49916	3.57309	3.90516
ENSBTAG00000012987	ENSBTAT00000017268	0.197676	0.00926539	6.19572	7.03521	6.51875	6.48769	5.48289	5.25023
ENSBTAG00000000439	ENSBTAT00000066481	0.038589	0.26865	11.8936	10.9901	10.1128	10.8456	10.4362	10.8439
ENSBTAG00000000139	ENSBTAT00000000160	0.125538	0.0306525	25.2142	23.7522	24.1647	22.7639	22.5662	21.7065
ENSBTAG00000001594	ENSBTAT00000002087	-0.0624628	0.941635	26.8562	22.9122	24.9682	24.5235	24.8041	28.7157
ENSBTAG00000004189	ENSBTAT00000005486	-0.0510701	0.948134	4.26003	4.34147	4.15488	4.35136	4.63744	4.22724
ENSBTAG00000004189	ENSBTAT00000005486	-0.0510701	0.948134	4.26003	4.34147	4.15488	4.35136	4.63744	4.22724
ENSBTAG00000029069	ENSBTAT00000041449	-2.72055	1	0	0	0.037422	0	0.246658	0
ENSBTAG00000004172	ENSBTAT00000022553	-0.171919	0.364962	2.67394	2.17231	1.98456	2.42119	2.70675	2.56735
ENSBTAG00000010812	ENSBTAT00000014321	0.390038	1.31622e-08	29.8874	32.7971	29.8596	23.6242	22.9754	24.0218
ENSBTAG00000005940	ENSBTAT00000007798	0.132595	0.0240358	15.338	13.974	14.3619	13.5203	13.8233	12.4952
ENSBTAG00000036183	ENSBTAT00000050675	0.0125177	0.387195	13.1152	13.2303	13.8984	13.1041	12.9172	13.8749
ENSBTAG00000019040	ENSBTAT00000025343	-0.262447	0.00357778	102.669	110.035	102.766	126.322	130.294	121.794
ENSBTAG00000011930	ENSBTAT00000029525	-0.0591683	0.968065	24.1469	25.411	23.9394	25.6338	25.0184	25.9222
ENSBTAG00000009346	ENSBTAT00000012303	0.0483552	0.171689	10.4824	9.70638	10.5158	9.92456	10.4741	9.29383
ENSBTAG00000006504	ENSBTAT00000045400	0.00924097	0.573391	4.19593	3.94252	4.46632	4.48717	3.73563	4.30149
ENSBTAG00000010368	ENSBTAT00000013685	0.179846	0.0262579	7.89744	9.82508	8.69688	7.77285	8.01658	7.53356
ENSBTAG00000017750	ENSBTAT00000023599	-0.27335	0.053041	5.29125	5.46151	5.75732	6.94129	6.41114	6.60184
ENSBTAG00000001189	ENSBTAT00000082086	-0.0763962	0.79297	16.7112	17.5165	15.7734	17.1698	17.1295	18.4209
ENSBTAG00000013152	ENSBTAT00000072910	-1.13436	3.89433e-20	2.22961	2.27693	2.24233	5.01771	5.64601	4.15143
ENSBTAG00000017890	ENSBTAT00000023779	0.0629817	0.3224	4.25559	4.44808	4.00101	4.38465	3.84304	3.93429
ENSBTAG00000002452	ENSBTAT00000081841	-0.0814975	0.763823	13.1499	11.8861	14.0968	14.124	12.8412	14.4419
ENSBTAG00000003390	ENSBTAT00000004398	-0.12032	0.420513	24.9641	26.3523	23.7909	26.6447	25.9457	29.0495
ENSBTAG00000009006	ENSBTAT00000056443	-0.00234474	0.497474	4.81412	4.22941	4.78394	4.46896	4.79022	4.59079
ENSBTAG00000046900	ENSBTAT00000063999	0.526564	1	0.110245	0.026176	0.198785	0.018721	0.082295	0.131686
ENSBTAG00000045094	ENSBTAT00000062527	inf	1	0.09264	0	0	0	0	0
ENSBTAG00000013971	ENSBTAT00000018572	0.0791293	0.110339	15.5866	16.4805	14.2357	13.7967	14.2967	15.7381
ENSBTAG00000044198	ENSBTAT00000060957	0.22887	0.0225746	10.5119	11.0944	11.3304	10.9262	8.35344	8.82529
ENSBTAG00000009145	ENSBTAT00000012050	-0.0219889	1	0.085709	0.07086	0.046136	0.069635	0.0663282	0.069855
ENSBTAG00000018048	ENSBTAT00000029374	-0.0688216	0.902453	8.56716	9.94317	9.63636	9.02542	9.41562	11.0809
ENSBTAG00000018048	ENSBTAT00000083165	-0.0688216	0.902453	8.56716	9.94317	9.63636	9.02542	9.41562	11.0809
ENSBTAG00000048885	ENSBTAT00000076062	0.326731	0.00243704	7.65938	6.95684	7.60252	6.19874	5.76614	5.75104
ENSBTAG00000051225	ENSBTAT00000070812	0.662227	0.00122175	1.04145	0.868901	0.82739	0.645871	0.556646	0.527469
ENSBTAG00000001473	ENSBTAT00000001929	0.012157	0.695804	1.15176	0.885727	1.11106	0.992457	1.11173	1.01794
ENSBTAG00000019871	ENSBTAT00000086836	-0.0113109	0.690817	5.97317	6.15785	6.00288	5.49764	6.47803	6.30097
ENSBTAG00000047299	ENSBTAT00000065888	0.17319	0.0197111	18.7722	18.723	18.5262	16.1188	15.8658	17.6997
ENSBTAG00000019810	ENSBTAT00000026393	-0.252073	0.005153	148.454	159.827	155.328	180.739	183.177	188.205
ENSBTAG00000013524	ENSBTAT00000017983	-0.365707	0.000301172	5.48314	5.79921	6.17285	7.5922	7.59625	7.30282
ENSBTAG00000013524	ENSBTAT00000017983	-0.365707	0.000301172	5.48314	5.79921	6.17285	7.5922	7.59625	7.30282
ENSBTAG00000009446	ENSBTAT00000012432	-0.374617	2.15644e-05	17.5919	16.1925	17.7052	22.9081	22.9979	20.8499
ENSBTAG00000009918	ENSBTAT00000072999	-0.51907	1.53282e-07	3.45119	3.04962	3.20222	4.64294	4.74754	4.51424
ENSBTAG00000045507	ENSBTAT00000063301	0.140289	0.0127153	3.77846	3.92108	3.66807	3.31129	3.5773	3.42567
ENSBTAG00000015766	ENSBTAT00000047968	0.730408	0.000216519	0.691593	0.864997	0.70735	0.533963	0.398243	0.432345
ENSBTAG00000020943	ENSBTAT00000066532	-0.0611668	0.96386	4.63906	4.40561	5.03407	5.56254	4.22234	4.9036
ENSBTAG00000033333	ENSBTAT00000047400	0.0869929	0.129399	9.26079	9.99789	9.86967	9.5002	8.99267	8.93098
ENSBTAG00000007096	ENSBTAT00000009333	-0.0719125	0.920891	1.17636	1.14415	1.02245	1.023	0.997342	1.49347
ENSBTAG00000012501	ENSBTAT00000067970	-0.160946	0.153962	23.1871	24.4669	24.2926	28.4746	26.2636	25.6995
ENSBTAG00000019267	ENSBTAT00000025657	0.649986	6.64604e-26	1724.28	1709.77	1639.92	1075.33	1070.25	1087.99
ENSBTAG00000053753	ENSBTAT00000069563	0.117396	0.413577	2.41442	2.80787	2.87601	3.05461	2.22586	2.18494
ENSBTAG00000012919	ENSBTAT00000017168	-0.139168	0.54616	1.52059	1.4983	1.64056	1.70741	1.68816	1.73575
ENSBTAG00000054188	ENSBTAT00000068609	0.172044	0.00435625	15.422	14.6505	14.7811	14.3349	13.3548	12.1218
ENSBTAG00000003519	ENSBTAT00000004574	0.359779	1.87961e-05	13.9863	12.0051	12.8915	10.3462	10.0202	9.93446
ENSBTAG00000039190	ENSBTAT00000054801	-0.105838	0.734385	1.7286	1.95495	1.65688	1.92812	1.7924	2.02641
ENSBTAG00000008860	ENSBTAT00000075639	0.112379	0.0328627	25.6337	28.2422	24.4981	23.3025	24.4216	24.7766
ENSBTAG00000008860	ENSBTAT00000075639	0.112379	0.0328627	25.6337	28.2422	24.4981	23.3025	24.4216	24.7766
ENSBTAG00000006417	ENSBTAT00000008416	0.170296	0.00642367	10.6989	10.383	10.3042	8.65583	9.05642	10.1794
ENSBTAG00000006417	ENSBTAT00000008416	0.170296	0.00642367	10.6989	10.383	10.3042	8.65583	9.05642	10.1794
ENSBTAG00000006417	ENSBTAT00000008416	0.170296	0.00642367	10.6989	10.383	10.3042	8.65583	9.05642	10.1794
ENSBTAG00000018037	ENSBTAT00000024011	0.0778479	0.16542	9.65033	10.7136	8.56503	9.46412	9.12151	8.8237
ENSBTAG00000009638	ENSBTAT00000012699	-0.290279	0.0285703	14.6481	13.0446	14.3308	14.8935	16.3953	20.1007
ENSBTAG00000050602	ENSBTAT00000071722	0.268897	0.0761267	0.780916	0.712617	0.71576	0.602239	0.688772	0.5426
ENSBTAG00000018421	ENSBTAT00000083468	-0.118717	0.392356	8.84883	9.16589	8.90794	9.83525	9.64546	9.75108
ENSBTAG00000014636	ENSBTAT00000019489	-0.158735	0.304492	1.51559	1.70807	1.74255	1.78045	1.82027	1.9431
ENSBTAG00000014636	ENSBTAT00000019489	-0.158735	0.304492	1.51559	1.70807	1.74255	1.78045	1.82027	1.9431
ENSBTAG00000006353	ENSBTAT00000073218	-0.00060113	0.547806	9.89677	9.69397	8.67655	9.59089	10.0024	8.68583
ENSBTAG00000007841	ENSBTAT00000010314	-0.109472	0.564523	8.4941	8.17821	8.72515	8.64299	9.53173	9.2249
ENSBTAG00000031441	ENSBTAT00000044557	-0.471928	0.00214316	15.5902	20.1841	14.9867	21.6228	20.3963	28.3844
ENSBTAG00000002763	ENSBTAT00000003584	-0.252675	0.0480642	3.23193	2.84852	3.01613	3.24943	3.56979	4.01858
ENSBTAG00000002763	ENSBTAT00000003584	-0.252675	0.0480642	3.23193	2.84852	3.01613	3.24943	3.56979	4.01858
ENSBTAG00000009714	ENSBTAT00000012813	-1.04417	0.000157182	0.351002	0.257336	0.181539	0.511269	0.479326	0.638277
ENSBTAG00000014872	ENSBTAT00000067485	-0.299347	0.00175597	188.884	213.894	193.457	249.187	233.22	251.311
ENSBTAG00000018225	ENSBTAT00000024256	-0.243735	0.0610216	1.76153	2.01513	1.74374	2.16164	2.2296	2.14521
ENSBTAG00000042990	ENSBTAT00000059982	0.0019724	1	0.465096	0	0.108014	0.021818	0.15665	0.393859
ENSBTAG00000018225	ENSBTAT00000024256	-0.243735	0.0610216	1.76153	2.01513	1.74374	2.16164	2.2296	2.14521
ENSBTAG00000011215	ENSBTAT00000073601	-0.191172	0.0616107	125.394	138.294	131.656	144.343	154.757	152.26
ENSBTAG00000001778	ENSBTAT00000002330	0.225384	0.0235377	7.87338	9.77344	9.31589	7.77453	7.30174	7.98675
ENSBTAG00000008573	ENSBTAT00000066266	0.634988	7.77604e-12	13.9786	14.2656	11.6924	9.19059	8.20187	8.32455
ENSBTAG00000004017	ENSBTAT00000032010	0.249925	0.000323788	7.31017	7.47327	6.66095	6.41142	5.96804	5.65399
ENSBTAG00000010467	ENSBTAT00000070366	0.121019	0.0175791	25.8218	25.8271	24.5521	22.8212	22.6004	24.6481
ENSBTAG00000017618	ENSBTAT00000047929	0.235929	0.00515679	5.32679	5.25271	5.24075	4.22432	4.47673	4.73252
ENSBTAG00000019150	ENSBTAT00000044153	0.328327	3.94629e-05	59.1775	65.9356	53.2378	47.0263	43.8465	51.1765
ENSBTAG00000004755	ENSBTAT00000083702	-0.373993	0.00257909	8.55819	10.306	9.69192	11.291	11.9613	13.7546
ENSBTAG00000004757	ENSBTAT00000065855	0.608868	2.36535e-13	28.162	33.6501	27.6953	18.3194	19.8225	20.549
ENSBTAG00000009079	ENSBTAT00000054453	-0.0389642	0.879643	5.99426	6.91258	7.38653	7.19643	6.53397	7.11852
ENSBTAG00000003168	ENSBTAT00000081408	-0.207683	0.0694153	48.3101	59.2025	54.2138	63.2722	62.8121	60.6826
ENSBTAG00000000332	ENSBTAT00000000437	-0.0337854	0.801868	13.07	13.0713	14.0525	12.5965	13.8967	14.653
ENSBTAG00000020756	ENSBTAT00000027660	0.0500038	0.226485	13.8881	15.3285	13.5968	14.8192	13.3216	13.2141
ENSBTAG00000020756	ENSBTAT00000081246	0.0500038	0.226485	13.8881	15.3285	13.5968	14.8192	13.3216	13.2141
ENSBTAG00000009493	ENSBTAT00000012490	-0.301271	0.0267452	7.89107	8.99005	8.31427	9.16865	10.4734	11.4044
ENSBTAG00000009495	ENSBTAT00000012495	-0.899753	4.25485e-23	14.4826	12.5252	12.471	23.144	24.6343	25.8793
ENSBTAG00000020560	ENSBTAT00000027395	0.111246	0.0282853	43.2416	47.5218	42.2394	40.2921	40.8439	41.9964
ENSBTAG00000013697	ENSBTAT00000075012	-0.0956121	0.712901	5.36314	4.55711	4.88422	5.59902	4.99307	5.22675
ENSBTAG00000013697	ENSBTAT00000075012	-0.0956121	0.712901	5.36314	4.55711	4.88422	5.59902	4.99307	5.22675
ENSBTAG00000013697	ENSBTAT00000075012	-0.0956121	0.712901	5.36314	4.55711	4.88422	5.59902	4.99307	5.22675
ENSBTAG00000049162	ENSBTAT00000074756	inf	1	0.191801	0	0	0	0	0
ENSBTAG00000002682	ENSBTAT00000003476	0.110947	0.0764046	6.73448	6.44635	5.9816	5.50996	6.05503	6.17903
ENSBTAG00000002070	ENSBTAT00000043681	-2.2197	1	0.0318453	0	0	0.0351484	0.0218909	0.0912951
ENSBTAG00000008014	ENSBTAT00000010538	-0.205476	0.0738194	17.1398	16.2713	17.317	18.7323	18.7307	21.0298
ENSBTAG00000014117	ENSBTAT00000018765	0.20332	0.00451688	7.22092	7.34946	7.72865	6.73664	5.90028	6.73089
ENSBTAG00000004138	ENSBTAT00000005415	-0.253892	0.158648	1.81074	2.38264	1.88371	2.27041	2.71045	2.26558
ENSBTAG00000021191	ENSBTAT00000028239	0.10094	0.0543462	153.57	177.602	153.647	147.207	146.882	157.969
ENSBTAG00000021191	ENSBTAT00000028239	0.10094	0.0543462	153.57	177.602	153.647	147.207	146.882	157.969
ENSBTAG00000043240	ENSBTAT00000060232	-0.0901022	1	0.269641	0.539477	0.279242	0.581744	0.576756	0
ENSBTAG00000023369	ENSBTAT00000042550	0.110875	0.46371	0.767944	1.07321	0.617586	0.695945	0.724582	0.856333
ENSBTAG00000009872	ENSBTAT00000013019	-0.143658	0.408295	4.62259	4.9021	4.25796	4.87561	4.82775	5.52236
ENSBTAG00000009872	ENSBTAT00000013019	-0.143658	0.408295	4.62259	4.9021	4.25796	4.87561	4.82775	5.52236
ENSBTAG00000001294	ENSBTAT00000001702	0.268622	1.39899e-05	37.8762	41.26	36.8125	32.449	32.3243	31.477
ENSBTAG00000002378	ENSBTAT00000003073	0.560627	4.57764e-15	152.509	167.289	147.853	104.109	101.934	111.029
ENSBTAG00000023415	ENSBTAT00000043080	0.450356	0.0383907	1.72421	2.51371	2.06765	1.07295	1.84186	1.69999
ENSBTAG00000038045	ENSBTAT00000006962	-0.380475	0.0995032	4.28419	5.16279	3.88031	6.3331	4.40156	6.6144
ENSBTAG00000014454	ENSBTAT00000066687	-0.182751	0.285403	1.95506	2.09167	1.80184	2.31211	2.28545	2.04083
ENSBTAG00000006612	ENSBTAT00000008680	-0.0965258	0.616999	10.7876	11.5937	11.0192	12.1391	12.3559	11.2167
ENSBTAG00000008518	ENSBTAT00000043183	0.0909998	0.0885128	12.8503	14.8977	13.1559	12.7139	12.5386	13.1511
ENSBTAG00000008518	ENSBTAT00000080207	0.0909998	0.0885128	12.8503	14.8977	13.1559	12.7139	12.5386	13.1511
ENSBTAG00000003457	ENSBTAT00000004485	-0.508456	1.34444e-08	30.4133	33.1514	31.0505	44.4682	42.4851	47.6394
ENSBTAG00000011083	ENSBTAT00000014714	-0.717813	3.62371e-08	3.38447	3.28003	2.92529	4.64606	5.28028	5.84586
ENSBTAG00000012333	ENSBTAT00000076816	-0.604058	0.196719	2.17659	0.692378	0.749486	2.03721	0.885966	2.57683
ENSBTAG00000012333	ENSBTAT00000076816	-0.604058	0.196719	2.17659	0.692378	0.749486	2.03721	0.885966	2.57683
ENSBTAG00000006419	ENSBTAT00000008420	1.07846	2.50551e-36	56.4399	43.1704	50.5127	23.5639	24.2372	23.2872
ENSBTAG00000011689	ENSBTAT00000069123	0.20273	0.000406875	20.4126	18.763	20.7853	16.5835	17.7289	17.7879
ENSBTAG00000020062	ENSBTAT00000026728	-0.287468	0.134841	1.88876	1.81289	1.9265	2.21821	2.07716	2.57376
ENSBTAG00000001051	ENSBTAT00000063567	-0.0914	0.778795	8.26658	10.6677	8.98279	9.75379	9.2031	10.7861
ENSBTAG00000046111	ENSBTAT00000065840	0.226008	0.0427827	5.01179	5.34571	4.6042	4.13599	4.82814	3.82809
ENSBTAG00000003261	ENSBTAT00000004225	-0.145019	0.539865	4.48008	5.20796	4.87544	5.47165	4.65554	5.97632
ENSBTAG00000013353	ENSBTAT00000012662	0.45864	0.0070983	1.72048	1.91047	1.50756	1.25624	1.40602	1.0769
ENSBTAG00000006422	ENSBTAT00000008424	-0.452948	9.43609e-08	31.795	28.4818	30.7201	39.8023	41.4454	43.3119
ENSBTAG00000015427	ENSBTAT00000020504	-0.012132	0.633669	28.6727	33.6912	29.3383	32.0133	28.0397	32.4235
ENSBTAG00000018772	ENSBTAT00000056158	0.231156	0.0921724	1.88841	1.69351	1.69649	1.25925	1.87765	1.36006
ENSBTAG00000004568	ENSBTAT00000006001	-0.560271	2.42379e-08	7.27555	6.702	6.9432	10.3497	10.6774	9.82151
ENSBTAG00000004568	ENSBTAT00000006001	-0.560271	2.42379e-08	7.27555	6.702	6.9432	10.3497	10.6774	9.82151
ENSBTAG00000033333	ENSBTAT00000047400	0.0869929	0.129399	9.26079	9.99789	9.86967	9.5002	8.99267	8.93098
ENSBTAG00000021165	ENSBTAT00000028205	0.162106	0.22704	1.26864	1.27251	1.15059	1.11368	0.977726	1.20798
ENSBTAG00000020318	ENSBTAT00000027077	-0.172759	0.352318	4.98963	4.54898	4.4994	4.76512	5.31746	5.74123
ENSBTAG00000032092	ENSBTAT00000045521	1.05386	2.4818e-60	366.235	388.562	376.641	183.784	181.597	179.609
ENSBTAG00000032427	ENSBTAT00000045966	-0.252449	0.0838943	4.14804	4.26879	3.87234	4.42427	5.63259	4.58233
ENSBTAG00000038134	ENSBTAT00000013295	0.281149	0.085606	1.83798	2.33986	1.81931	1.33855	1.7304	1.86632
ENSBTAG00000005685	ENSBTAT00000007470	0.292001	1	0.402217	0.336148	0.450563	0.266687	0.307942	0.39645
ENSBTAG00000006404	ENSBTAT00000008396	-2.17726	2.8568e-44	1.22544	1.48553	1.19142	6.25578	5.35031	6.04415
ENSBTAG00000018040	ENSBTAT00000078966	0.166659	0.144562	8.28092	11.4684	8.40253	8.23412	7.52267	9.32378
ENSBTAG00000018043	ENSBTAT00000024018	-0.333862	0.0491192	5.39338	5.97435	5.37347	7.07834	6.02588	7.9961
ENSBTAG00000006353	ENSBTAT00000073218	-0.00060113	0.547806	9.89677	9.69397	8.67655	9.59089	10.0024	8.68583
ENSBTAG00000002687	ENSBTAT00000003479	-0.217719	0.0738727	5.78539	5.60659	5.64754	6.35097	7.18108	6.28311
ENSBTAG00000002764	ENSBTAT00000074758	0.233987	0.154876	1.5111	1.24518	1.05026	1.19734	1.00442	1.03489
ENSBTAG00000002764	ENSBTAT00000074758	0.233987	0.154876	1.5111	1.24518	1.05026	1.19734	1.00442	1.03489
ENSBTAG00000018598	ENSBTAT00000024749	0.3148	0.000702308	102.627	135.977	97.5042	93.6304	87.5995	88.9891
ENSBTAG00000019674	ENSBTAT00000026221	-0.222053	0.0450026	22.9334	24.433	20.7256	27.2599	27.3794	24.7827
ENSBTAG00000014878	ENSBTAT00000019808	0.709455	2.80375e-06	8.87883	10.4044	9.83009	6.05606	6.22355	5.52465
ENSBTAG00000001776	ENSBTAT00000002327	0.0466981	0.574959	34.0547	62.7389	55.5092	57.023	54.4364	35.9924
ENSBTAG00000046295	ENSBTAT00000063324	0.732462	0.00851841	1.00338	0.737468	1.23308	0.787319	0.605193	0.397427
ENSBTAG00000047158	ENSBTAT00000063750	0.452407	0.0458438	0.411614	0.508115	0.439158	0.249184	0.447106	0.296815
ENSBTAG00000040067	ENSBTAT00000052307	0.8197	0.000259395	0.512708	0.688551	0.573158	0.274076	0.333613	0.397624
ENSBTAG00000017333	ENSBTAT00000010183	0.0471879	0.726308	0.200622	0.184035	0.25691	0.249818	0.197507	0.173597
ENSBTAG00000019461	ENSBTAT00000025925	0.18675	0.018235	6.4783	7.14834	5.9115	5.60572	5.73584	5.82431
ENSBTAG00000023453	ENSBTAT00000043989	0.28249	0.0350665	2.86532	3.80405	3.26108	2.81565	3.20081	2.14807
ENSBTAG00000023453	ENSBTAT00000043989	0.28249	0.0350665	2.86532	3.80405	3.26108	2.81565	3.20081	2.14807
ENSBTAG00000020457	ENSBTAT00000071938	-0.15162	0.234328	20.8215	22.1748	19.3288	23.7134	22.4733	23.0451
ENSBTAG00000020457	ENSBTAT00000071938	-0.15162	0.234328	20.8215	22.1748	19.3288	23.7134	22.4733	23.0451
ENSBTAG00000039015	ENSBTAT00000056129	0.493306	0.00968027	1.86179	1.89418	1.76891	1.05454	1.14664	1.72367
ENSBTAG00000019785	ENSBTAT00000026362	0.231307	0.000437762	7.46335	7.56934	6.64567	6.02804	6.00183	6.43712
ENSBTAG00000019785	ENSBTAT00000026362	0.231307	0.000437762	7.46335	7.56934	6.64567	6.02804	6.00183	6.43712
ENSBTAG00000019785	ENSBTAT00000026362	0.231307	0.000437762	7.46335	7.56934	6.64567	6.02804	6.00183	6.43712
ENSBTAG00000020754	ENSBTAT00000027659	-0.00124356	0.6879	2.47493	2.81879	2.5373	2.38328	2.70523	2.74926
ENSBTAG00000018912	ENSBTAT00000066417	-0.0810263	0.757608	9.38495	8.33959	9.67006	9.38097	9.93689	9.65932
ENSBTAG00000016268	ENSBTAT00000079266	-0.22953	0.176827	5.05194	5.28623	3.86569	5.51932	5.65805	5.47599
ENSBTAG00000011815	ENSBTAT00000015684	0.0773936	0.254824	6.45149	8.07977	7.36201	6.6054	6.79512	7.34924
ENSBTAG00000013921	ENSBTAT00000018492	2.06154	1.11635e-100	43.1697	39.6948	44.6657	9.23229	9.52112	11.7977
ENSBTAG00000002072	ENSBTAT00000069093	-0.24179	0.0743016	5.45314	5.46467	4.48508	6.33614	5.88994	5.9872
ENSBTAG00000020689	ENSBTAT00000027570	0.958648	1.24433e-12	2.86222	3.07799	2.74553	1.54045	1.22142	1.70728
ENSBTAG00000013346	ENSBTAT00000017753	0.0168108	0.638372	3.14874	3.68128	2.41656	3.06133	3.27433	2.8038
ENSBTAG00000013346	ENSBTAT00000017753	0.0168108	0.638372	3.14874	3.68128	2.41656	3.06133	3.27433	2.8038
ENSBTAG00000012101	ENSBTAT00000016048	-0.338119	0.000307953	9.53269	9.55844	9.3104	11.4682	11.842	12.5923
ENSBTAG00000030705	ENSBTAT00000043415	-0.471982	0.0888142	1.80973	3.47759	2.09384	3.18102	3.28286	3.77389
ENSBTAG00000005830	ENSBTAT00000083038	0.192016	0.00293567	9.50049	9.40111	8.35612	8.07043	7.75537	8.03511
ENSBTAG00000013577	ENSBTAT00000018050	-0.0106869	0.516304	96.3344	103.37	97.43	101.019	98.123	100.202
ENSBTAG00000010584	ENSBTAT00000013989	-0.255403	0.0179626	65.9066	66.576	67.5385	75.2211	74.97	88.5678
ENSBTAG00000014595	ENSBTAT00000031920	-0.890302	3.71296e-15	3.2047	3.73677	3.5803	6.1965	7.04559	6.2607
ENSBTAG00000012016	ENSBTAT00000081875	-0.162509	0.549989	0.854147	1.13155	0.94548	1.05083	1.27446	0.95538
ENSBTAG00000012016	ENSBTAT00000081875	-0.162509	0.549989	0.854147	1.13155	0.94548	1.05083	1.27446	0.95538
ENSBTAG00000006757	ENSBTAT00000008890	0.151716	0.28946	1.34928	1.74716	1.27632	1.31641	1.33157	1.28829
ENSBTAG00000023374	ENSBTAT00000023560	-0.99961	1	0.103972	0.109606	0.0853193	0.222689	0.164885	0.210058
ENSBTAG00000009177	ENSBTAT00000061135	0.902413	7.29628e-30	18.9083	20.3563	18.1001	10.1031	9.95246	10.6341
ENSBTAG00000039958	ENSBTAT00000007423	-0.41971	7.06883e-06	14.4135	16.5142	14.5343	19.9235	20.547	20.3422
ENSBTAG00000039958	ENSBTAT00000007423	-0.41971	7.06883e-06	14.4135	16.5142	14.5343	19.9235	20.547	20.3422
ENSBTAG00000002844	ENSBTAT00000068751	-0.20774	0.529757	0.227913	0.306835	0.249283	0.314522	0.250192	0.340746
ENSBTAG00000020983	ENSBTAT00000027944	-0.503544	1.25697e-06	49.6227	58.869	47.5213	75.5989	70.8446	74.7349
ENSBTAG00000001834	ENSBTAT00000002397	-0.0953885	0.715771	8.98362	8.1619	7.6643	9.42977	7.97399	9.10189
ENSBTAG00000005763	ENSBTAT00000007575	-0.0473288	0.915374	16.7939	18.3215	16.4692	18.2948	17.394	17.6161
ENSBTAG00000005367	ENSBTAT00000007054	0.20649	0.0783401	3.42514	3.21353	2.79498	2.83102	2.57416	2.77043
ENSBTAG00000048515	ENSBTAT00000074553	0.426442	0.00209615	7.39894	7.16184	9.54001	4.79658	6.16339	6.97329
ENSBTAG00000013107	ENSBTAT00000050235	1.00396	2.72795e-07	0.391535	0.408904	0.435016	0.192086	0.182647	0.2413
ENSBTAG00000018539	ENSBTAT00000024677	0.112809	0.392858	0.572494	0.604841	0.490556	0.529551	0.556446	0.456445
ENSBTAG00000046996	ENSBTAT00000064026	-0.0454728	0.898892	45.039	52.5796	44.9985	46.0566	48.7162	52.4111
ENSBTAG00000047508	ENSBTAT00000063274	0.279415	0.0787981	4.93592	4.26007	4.78147	3.676	3.76352	4.07687
ENSBTAG00000012333	ENSBTAT00000057144	-0.604058	0.196719	2.17659	0.692378	0.749486	2.03721	0.885966	2.57683
ENSBTAG00000043361	ENSBTAT00000060353	-3.65869	1	0.053294	0	0	0.534538	0	0.138524
ENSBTAG00000021057	ENSBTAT00000028044	-0.350667	0.248013	0.656916	0.877997	0.611629	0.922662	0.665818	1.14868
ENSBTAG00000045989	ENSBTAT00000064815	-0.38142	0.178476	4.7064	7.01726	5.71508	5.75595	6.99702	9.96314
ENSBTAG00000014900	ENSBTAT00000019836	-0.257897	0.0532856	7.48921	8.14799	6.4343	8.73451	8.39672	9.26041
ENSBTAG00000014900	ENSBTAT00000019836	-0.257897	0.0532856	7.48921	8.14799	6.4343	8.73451	8.39672	9.26041
ENSBTAG00000012744	ENSBTAT00000082978	-0.307959	0.000457321	34.8353	34.7846	35.2902	42.7797	45.8671	41.2271
ENSBTAG00000037581	ENSBTAT00000056154	-0.0137091	0.681192	5.63711	6.781	6.30678	6.26231	6.09492	6.54644
ENSBTAG00000019806	ENSBTAT00000084961	0.661374	8.8691e-12	16.3895	16.8124	16.2042	9.81591	10.126	11.2964
ENSBTAG00000011721	ENSBTAT00000035470	0.18382	0.000766539	18.0979	17.0272	18.5386	15.715	16.6323	14.8965
ENSBTAG00000025250	ENSBTAT00000069814	0	1	NA	NA	NA	NA	NA	NA
ENSBTAG00000015527	ENSBTAT00000020634	0.427997	9.84081e-12	30.9195	32.9446	30.5215	23.2195	24.0617	22.8749
ENSBTAG00000015527	ENSBTAT00000020634	0.427997	9.84081e-12	30.9195	32.9446	30.5215	23.2195	24.0617	22.8749
ENSBTAG00000006601	ENSBTAT00000008672	0.602335	2.01644e-08	3.61529	4.00693	3.84078	2.35673	2.6932	2.50061
ENSBTAG00000009036	ENSBTAT00000011900	0.0448293	0.180375	22.1154	23.4591	21.966	20.6759	21.7704	23.0276
ENSBTAG00000009036	ENSBTAT00000011900	0.0448293	0.180375	22.1154	23.4591	21.966	20.6759	21.7704	23.0276
ENSBTAG00000015639	ENSBTAT00000020770	-0.00711354	0.588544	9.95803	10.0511	9.4454	9.42118	9.99876	10.1802
ENSBTAG00000011491	ENSBTAT00000015274	0.200432	0.00314455	4.9248	4.79763	4.56225	3.94518	4.11141	4.37522
ENSBTAG00000045500	ENSBTAT00000065570	0.0333854	0.273442	6.70918	6.43341	6.84272	6.27747	6.72911	6.52156
ENSBTAG00000016806	ENSBTAT00000086298	0.370545	1.11964e-09	50.7414	49.074	52.4461	39.185	41.5192	37.0687
ENSBTAG00000008591	ENSBTAT00000011330	0.460548	6.27847e-11	13.9018	15.9273	14.802	11.0806	10.4871	10.8661
ENSBTAG00000008590	ENSBTAT00000011329	-0.00443214	0.52562	44.6583	45.9495	43.7687	44.2581	42.9857	47.5462
ENSBTAG00000018315	ENSBTAT00000086331	-0.1257	0.449114	5.52125	5.76399	5.28562	6.09589	5.71683	6.2667
ENSBTAG00000019446	ENSBTAT00000068270	0.0372619	0.186436	28.9817	28.7258	30.0135	28.6017	28.9791	27.9034
ENSBTAG00000019446	ENSBTAT00000025904	0.0372619	0.186436	28.9817	28.7258	30.0135	28.6017	28.9791	27.9034
ENSBTAG00000002018	ENSBTAT00000002616	-0.425805	5.86428e-08	164.397	165.625	175.068	229.315	231.086	218.098
ENSBTAG00000010532	ENSBTAT00000035087	2.57828	0.000275301	0.309643	0.408031	4.95605	0.24029	0.270995	0.438723
ENSBTAG00000020252	ENSBTAT00000026987	0.182172	0.00412483	10.7139	11.4677	10.6033	10.0019	8.87386	10.0201
ENSBTAG00000046765	ENSBTAT00000064788	0.188467	0.00210134	17.8379	19.7959	17.051	15.8296	15.7562	16.4022
ENSBTAG00000031725	ENSBTAT00000045584	-0.00627724	0.662591	8.89431	10.8088	10.4425	9.90043	9.97328	10.4034
ENSBTAG00000048062	ENSBTAT00000063022	-0.585536	4.36829e-10	3.80145	4.06735	3.90196	5.64218	6.24517	5.7758
ENSBTAG00000031509	ENSBTAT00000044654	-0.492527	1.24801e-05	3.84402	3.46635	3.95515	5.66393	5.37792	4.8077
ENSBTAG00000001014	ENSBTAT00000001347	0.480681	8.40439e-07	5.37136	6.72245	5.91211	4.19058	4.23541	4.47774
ENSBTAG00000010576	ENSBTAT00000079131	-0.31155	0.00182576	16.971	14.3141	15.5903	19.9166	20.1059	18.152
ENSBTAG00000006072	ENSBTAT00000007978	-0.10041	0.516644	100.719	101.356	102.583	113.255	106.357	107.005
ENSBTAG00000013103	ENSBTAT00000017420	0.127728	0.00629738	7584.37	7370.58	7305.15	6633.93	6750.2	6989.92
ENSBTAG00000039954	ENSBTAT00000072788	0.12933	0.0358568	78.2155	87.0002	78.7005	75.3946	66.9067	80.7005
ENSBTAG00000013523	ENSBTAT00000017982	0.0276656	0.520422	2.09951	2.42065	2.55106	2.45887	2.2663	2.21174
ENSBTAG00000016911	ENSBTAT00000022495	0.48703	1.82567e-11	9.16628	9.56174	8.97497	6.50786	6.3711	6.88691
ENSBTAG00000011532	ENSBTAT00000015325	0.572425	4.26015e-11	6.87764	6.68937	5.8564	4.15971	4.33679	4.56546
ENSBTAG00000006250	ENSBTAT00000008203	-0.0405415	0.834766	18.3671	18.0374	17.3908	19.6279	19.0424	16.6582
ENSBTAG00000010384	ENSBTAT00000083861	-1.23838	4.55219e-06	0.29893	0.630554	0.530709	1.14329	1.31586	0.985938
ENSBTAG00000010384	ENSBTAT00000013706	-1.23838	4.55219e-06	0.29893	0.630554	0.530709	1.14329	1.31586	0.985938
ENSBTAG00000012500	ENSBTAT00000016586	-0.15391	0.281292	12.327	14.0704	11.2154	13.9295	14.0568	13.861
ENSBTAG00000008611	ENSBTAT00000073997	0.0543526	0.128046	114.391	112.86	107.612	103.222	106.307	112.954
ENSBTAG00000011454	ENSBTAT00000015220	-0.199744	0.0541238	152.038	156.5	143.381	169.104	168.02	181.902
ENSBTAG00000019218	ENSBTAT00000083899	0.294781	7.80243e-05	12.7143	14.5395	11.7587	10.3636	10.8741	10.5652
ENSBTAG00000006801	ENSBTAT00000008944	-0.828208	1.46022e-07	2.10251	2.14114	1.83474	3.65778	3.05035	4.08394
ENSBTAG00000018823	ENSBTAT00000054338	0.421592	1.07274e-08	42.271	47.4741	41.9839	32.3263	31.0023	35.0203
ENSBTAG00000015739	ENSBTAT00000073591	0.0200835	0.277019	126.051	124.598	123.56	117.058	122.87	129.108
ENSBTAG00000004249	ENSBTAT00000005565	-0.695037	8.7341e-10	2.97791	2.93941	2.68544	4.07088	5.07742	4.77894
ENSBTAG00000018172	ENSBTAT00000024181	0.250181	0.0445951	2.75037	2.89247	2.19748	2.17936	1.97561	2.4371
ENSBTAG00000019321	ENSBTAT00000042663	-0.0735673	0.934197	0.86167	0.858385	0.863083	0.912709	0.884352	0.921216
ENSBTAG00000000042	ENSBTAT00000000046	-0.226603	0.0440179	82.0865	85.9526	84.551	92.1733	92.7836	110.593
ENSBTAG00000008498	ENSBTAT00000011202	-0.444337	3.92595e-05	18.2771	20.8579	17.8654	23.7871	25.762	28.0108
ENSBTAG00000030209	ENSBTAT00000034731	-0.195827	0.0644054	134.586	146.528	136.436	157.66	152.775	167.819
ENSBTAG00000030209	ENSBTAT00000042645	-0.195827	0.0644054	134.586	146.528	136.436	157.66	152.775	167.819
ENSBTAG00000030209	ENSBTAT00000042645	-0.195827	0.0644054	134.586	146.528	136.436	157.66	152.775	167.819
ENSBTAG00000006045	ENSBTAT00000007943	-0.707644	9.3327e-23	328.181	308.044	331.752	521.093	531.752	527.992
ENSBTAG00000024929	ENSBTAT00000065817	-2.2767	1.14471e-14	0.750885	0.344973	0.420353	2.34936	1.97715	3.02058
ENSBTAG00000019105	ENSBTAT00000042613	-0.0913027	0.611032	20.7897	20.0807	21.4178	21.481	22.3931	22.4834
ENSBTAG00000019105	ENSBTAT00000042613	-0.0913027	0.611032	20.7897	20.0807	21.4178	21.481	22.3931	22.4834
ENSBTAG00000019972	ENSBTAT00000026602	0.163928	0.0628142	5.1359	5.97411	4.67037	4.68188	4.56986	4.83369
ENSBTAG00000000875	ENSBTAT00000077775	-0.0917782	0.707486	4.3224	4.50329	4.55883	4.91797	4.64033	4.70537
ENSBTAG00000010899	ENSBTAT00000014476	1.00677	7.90167e-48	241.412	233.222	215.468	117.114	114.36	111.962
ENSBTAG00000021505	ENSBTAT00000028663	-0.0519926	0.96419	5.08271	4.88278	5.0382	4.85769	5.62569	5.07087
ENSBTAG00000009029	ENSBTAT00000011887	0.675868	0.000463364	1.62506	1.36267	1.31106	0.901433	1.02894	0.760478
ENSBTAG00000007121	ENSBTAT00000034713	-1.04502	4.22096e-15	3.05178	2.90026	2.89216	6.44235	5.39386	6.41286
ENSBTAG00000016240	ENSBTAT00000021614	0.225514	0.00945759	3.16674	3.30939	3.05601	2.92158	2.43482	2.79635
ENSBTAG00000044918	ENSBTAT00000062351	inf	1	0	0	0.452682	0	0	0
ENSBTAG00000008634	ENSBTAT00000075188	0.0984143	0.141152	17.9199	22.4083	17.3917	17.9966	16.5708	19.3464
ENSBTAG00000014964	ENSBTAT00000019921	-0.338625	0.00255345	14.2522	15.2089	14.1111	18.144	17.6878	19.2673
ENSBTAG00000011715	ENSBTAT00000015555	0.167857	0.043005	3.50683	3.48698	3.25617	2.93673	3.15723	3.03021
ENSBTAG00000007220	ENSBTAT00000009497	0.13547	0.0276483	5.65538	5.78284	5.27417	5.28317	5.06427	4.86707
ENSBTAG00000016133	ENSBTAT00000021471	-0.422921	0.000191782	11.8166	12.2976	12.5918	14.5545	16.4375	18.2176
ENSBTAG00000051385	ENSBTAT00000077522	1.3765	4.6532e-10	0.44158	0.455791	0.464221	0.157465	0.200013	0.16694
ENSBTAG00000034963	ENSBTAT00000049437	0.0268489	0.602689	1.88572	2.21242	1.66651	1.89016	2.03607	1.73213
ENSBTAG00000045484	ENSBTAT00000062917	-2.92007	1	0	0.035419	0	0	0.268081	0
ENSBTAG00000010073	ENSBTAT00000013288	0.0372072	0.291238	11.3668	12.8659	10.9503	11.3618	10.7747	12.1508
ENSBTAG00000010073	ENSBTAT00000013288	0.0372072	0.291238	11.3668	12.8659	10.9503	11.3618	10.7747	12.1508
ENSBTAG00000010073	ENSBTAT00000013288	0.0372072	0.291238	11.3668	12.8659	10.9503	11.3618	10.7747	12.1508
ENSBTAG00000017380	ENSBTAT00000023111	-0.0330291	0.771	16.2196	16.4207	15.1592	15.9131	16.0324	16.961
ENSBTAG00000001120	ENSBTAT00000001490	-0.703749	2.0606e-05	1.62017	2.02057	1.91053	2.62972	3.20315	3.20866
ENSBTAG00000011011	ENSBTAT00000014625	-0.161237	0.392845	2.33409	2.17396	2.28281	2.19695	2.83755	2.55934
ENSBTAG00000046273	ENSBTAT00000063495	0.551105	4.22124e-17	33.334	33.7749	33.522	22.2712	22.7905	23.6186
ENSBTAG00000011488	ENSBTAT00000046260	-0.206093	0.0268633	50.4228	52.3032	50.3966	59.2949	58.9125	58.4287
ENSBTAG00000000267	ENSBTAT00000000333	-0.241318	0.0120536	10.0721	10.0202	9.72155	11.4793	11.5644	12.1984
ENSBTAG00000025129	ENSBTAT00000075542	0.02924	0.465871	3.17854	3.23812	2.60781	2.67299	3.2058	2.96463
ENSBTAG00000007430	ENSBTAT00000009771	-0.0097992	0.505358	23.8668	23.0082	23.1114	23.4663	23.1914	23.8057
ENSBTAG00000005534	ENSBTAT00000076667	-0.203161	0.0646973	14.108	15.046	14.0101	16.1912	16.4585	17.0417
ENSBTAG00000013392	ENSBTAT00000080368	-0.0800545	0.793334	8.87718	8.41313	7.62822	8.50548	8.55238	9.28247
ENSBTAG00000019443	ENSBTAT00000025896	-0.057501	0.986234	28.7972	30.5267	29.4992	31.2687	29.7086	31.4575
ENSBTAG00000010513	ENSBTAT00000013888	0.351722	5.73692e-05	19.9219	22.029	19.2688	17.1813	14.0612	16.7322
ENSBTAG00000010513	ENSBTAT00000013888	0.351722	5.73692e-05	19.9219	22.029	19.2688	17.1813	14.0612	16.7322
ENSBTAG00000010513	ENSBTAT00000013888	0.351722	5.73692e-05	19.9219	22.029	19.2688	17.1813	14.0612	16.7322
ENSBTAG00000000134	ENSBTAT00000000147	-0.336216	0.00117499	21.7858	22.0084	25.0427	30.1172	29.8971	26.8884
ENSBTAG00000011994	ENSBTAT00000075766	0.181764	0.0548012	13.6351	17.8072	16.4834	15.8119	11.4547	14.986
ENSBTAG00000011803	ENSBTAT00000001120	1.27208	7.95899e-87	665.727	670.04	642.181	274.954	274.175	269.868
ENSBTAG00000001014	ENSBTAT00000001347	0.480681	8.40439e-07	5.37136	6.72245	5.91211	4.19058	4.23541	4.47774
ENSBTAG00000004635	ENSBTAT00000043699	0.0803852	0.0979705	7.84062	8.16108	7.87622	7.54112	7.29166	7.75109
ENSBTAG00000025046	ENSBTAT00000034976	0.124944	0.0102545	31.5318	28.8317	30.6578	27.7803	27.9867	27.7032
ENSBTAG00000009835	ENSBTAT00000066790	0.645813	3.58565e-08	1.49098	1.62884	1.39531	1.01802	0.864055	1.0037
ENSBTAG00000009835	ENSBTAT00000066790	0.645813	3.58565e-08	1.49098	1.62884	1.39531	1.01802	0.864055	1.0037
ENSBTAG00000003956	ENSBTAT00000005180	0.141203	0.0475127	13.8631	13.721	13.8209	12.1872	11.2426	14.1146
ENSBTAG00000011435	ENSBTAT00000015199	0.223737	0.000476534	42.9307	41.4346	44.2251	38.2578	39.5435	32.3163
ENSBTAG00000011539	ENSBTAT00000015331	0.216898	0.0098261	10.346	11.7519	9.33347	8.95879	8.30183	9.78342
ENSBTAG00000021798	ENSBTAT00000029056	0.57969	1.93176e-17	13.8297	14.1983	13.0311	9.46215	8.92476	9.08601
ENSBTAG00000015308	ENSBTAT00000055258	-0.0365348	0.772797	52.7243	53.5115	52.5496	55.9147	54.2227	52.7204
ENSBTAG00000052414	ENSBTAT00000068632	-0.190194	0.551414	0.596128	0.610247	0.646045	0.684093	0.75509	0.674275
ENSBTAG00000011456	ENSBTAT00000069930	0.121413	0.041585	10.9106	11.181	10.6818	9.80136	9.85622	10.4706
ENSBTAG00000015751	ENSBTAT00000054676	-1.89999	2.58456e-27	0.607994	0.756973	0.820012	2.80746	2.91972	2.42738
ENSBTAG00000019660	ENSBTAT00000034803	0.376475	8.89263e-05	8.87098	8.28906	10.1263	6.78937	7.04403	7.18573
ENSBTAG00000019662	ENSBTAT00000026201	-0.0409301	0.84322	11.6076	10.843	11.1534	11.2318	11.4916	11.8476
ENSBTAG00000008154	ENSBTAT00000010719	-0.44792	0.00148803	5.10543	4.79648	4.74567	6.71629	6.54295	6.7211
ENSBTAG00000003687	ENSBTAT00000004805	0.0392721	0.218973	13.8257	15.0769	13.4575	13.79	13.6832	13.7492
ENSBTAG00000019317	ENSBTAT00000086806	0.020954	0.476985	10.8375	11.3733	8.78502	8.99901	11.3836	10.1662
ENSBTAG00000019317	ENSBTAT00000086806	0.020954	0.476985	10.8375	11.3733	8.78502	8.99901	11.3836	10.1662
ENSBTAG00000055145	ENSBTAT00000000538	0.0575192	0.263782	7.42418	7.2378	7.56322	6.95596	6.96601	7.43457
ENSBTAG00000000411	ENSBTAT00000000527	0.131998	0.0110492	17.0742	16.4131	17.0908	14.8473	15.3204	15.9881
ENSBTAG00000000356	ENSBTAT00000034734	0.0748909	0.172455	11.3165	10.5725	11.6534	10.4749	9.95947	11.4113
ENSBTAG00000016776	ENSBTAT00000022317	-0.750829	1.59376e-15	2.05882	2.10871	2.12589	3.43809	3.65138	3.50084
ENSBTAG00000019044	ENSBTAT00000025350	-0.20442	0.257069	2.39188	2.53473	2.46576	3.01954	2.37998	3.11814
ENSBTAG00000000675	ENSBTAT00000000897	-0.418911	0.000222477	3.87947	3.94938	4.12794	5.22737	4.91547	5.8424
ENSBTAG00000002633	ENSBTAT00000003415	-0.290714	0.000987133	56.2802	58.53	53.2675	67.8418	69.9463	67.8124
ENSBTAG00000002633	ENSBTAT00000003415	-0.290714	0.000987133	56.2802	58.53	53.2675	67.8418	69.9463	67.8124
ENSBTAG00000002633	ENSBTAT00000003415	-0.290714	0.000987133	56.2802	58.53	53.2675	67.8418	69.9463	67.8124
ENSBTAG00000002633	ENSBTAT00000003415	-0.290714	0.000987133	56.2802	58.53	53.2675	67.8418	69.9463	67.8124
ENSBTAG00000002633	ENSBTAT00000003415	-0.290714	0.000987133	56.2802	58.53	53.2675	67.8418	69.9463	67.8124
ENSBTAG00000013556	ENSBTAT00000018027	-1.87228	8.64933e-05	0.00930855	0.0859697	0.0871848	0.27319	0.205441	0.189386
ENSBTAG00000018663	ENSBTAT00000087035	-0.610384	0.00177218	0.898605	1.24635	1.20857	1.60964	1.5522	1.95786
ENSBTAG00000011007	ENSBTAT00000014618	0.0489257	0.138981	26.8955	27.0924	25.2327	25.5158	25.5897	25.4736
ENSBTAG00000045824	ENSBTAT00000063815	-0.687129	0.00627708	0.797817	0.790547	0.5159	1.14898	1.00065	1.2384
ENSBTAG00000004746	ENSBTAT00000006233	-0.215132	0.0394865	8.33819	8.57962	9.30888	10.35	10.587	9.50725
ENSBTAG00000001962	ENSBTAT00000002549	-0.0188572	0.62647	14.3558	13.4229	13.3495	14.0085	14.078	13.5829
ENSBTAG00000016152	ENSBTAT00000021501	0.77083	4.77965e-27	154.523	171.738	155.229	97.3347	96.8842	87.9726
ENSBTAG00000017551	ENSBTAT00000067638	-0.0390384	0.835313	5.81194	6.00707	5.70555	6.16779	6.16802	5.66942
ENSBTAG00000016441	ENSBTAT00000021860	0.217244	0.000518544	30.9202	28.6265	32.9046	26.1161	26.3298	27.0814
ENSBTAG00000015466	ENSBTAT00000020559	-0.0959618	0.60413	30.9003	28.1419	29.2123	30.5421	30.0937	33.6886
ENSBTAG00000006971	ENSBTAT00000048732	0.15743	0.0173417	15.1353	15.5848	15.4248	13.9837	12.4207	14.9701
ENSBTAG00000006971	ENSBTAT00000048732	0.15743	0.0173417	15.1353	15.5848	15.4248	13.9837	12.4207	14.9701
ENSBTAG00000001961	ENSBTAT00000086667	-0.378168	1.3378e-05	54.1599	52.9695	51.684	69.7615	73.9849	62.6618
ENSBTAG00000000363	ENSBTAT00000000474	0.0405063	0.20373	7.29102	6.9804	7.7257	7.15805	7.53967	6.69038
ENSBTAG00000025964	ENSBTAT00000064460	-0.268506	0.0522256	1.19443	1.27332	1.23215	1.43898	1.64149	1.37627
ENSBTAG00000000084	ENSBTAT00000000091	-0.247642	0.069614	11.3105	11.0531	12.2474	14.6381	14.5115	11.9429
ENSBTAG00000034435	ENSBTAT00000048774	0.0351033	0.591413	4.80592	4.89828	3.98148	3.95994	4.19848	5.19828
ENSBTAG00000046019	ENSBTAT00000064981	-0.0247225	0.692283	61.1486	63.8931	61.9736	60.5136	60.862	68.8721
ENSBTAG00000008251	ENSBTAT00000072712	-0.368365	0.000186378	29.8026	31.6232	29.484	38.0302	36.9347	42.3897
ENSBTAG00000018603	ENSBTAT00000087470	1.55458	3.06463e-14	1.13257	1.35737	1.0568	0.329513	0.423072	0.454823
ENSBTAG00000037383	ENSBTAT00000028060	0.265308	9.39028e-06	5.61819	5.92071	5.73112	4.62041	4.91048	4.83814
ENSBTAG00000014762	ENSBTAT00000019639	0.90013	1	0.229423	0.226783	0.062397	0.0796515	0.118834	0.079402
ENSBTAG00000002418	ENSBTAT00000003143	-2.21305	1.94906e-30	0.192634	0.252095	0.212901	0.985077	1.04112	1.02293
ENSBTAG00000000026	ENSBTAT00000000029	-0.186243	0.21684	6.59465	7.86393	6.80208	8.18206	7.86158	8.14667
ENSBTAG00000001616	ENSBTAT00000072327	0.418719	2.44083e-07	7.13928	6.39941	6.06108	4.80804	4.70616	5.14817
ENSBTAG00000001396	ENSBTAT00000071313	-0.0357218	0.830651	6.63924	6.18918	6.02922	5.74796	6.53253	7.0499
ENSBTAG00000009985	ENSBTAT00000013167	-0.0256381	0.682551	9.50249	9.07036	8.8899	9.65042	9.40132	8.90341
ENSBTAG00000007308	ENSBTAT00000009613	-0.188706	0.149465	6.55114	6.12147	5.90867	6.50089	7.1238	7.55315
ENSBTAG00000000010	ENSBTAT00000000010	0.13594	0.0367818	14.3615	15.6816	15.116	13.9376	13.0195	14.1411
ENSBTAG00000011113	ENSBTAT00000014755	1.12225	1	0.160479	0.134537	0.103303	0.073097	0.044985	0.064896
ENSBTAG00000009186	ENSBTAT00000012105	0.0463245	1	0.588225	0.180242	0.258697	0.28483	0.260955	0.448921
ENSBTAG00000006819	ENSBTAT00000008973	0.073322	0.152913	6.06044	6.35062	6.15773	6.43899	5.86175	5.3479
ENSBTAG00000014001	ENSBTAT00000085735	-0.183574	0.0782178	29.4328	29.9574	27.9168	31.3422	34.4213	33.3906
ENSBTAG00000009293	ENSBTAT00000069422	-0.39322	5.28284e-05	8.73772	9.92712	9.51709	11.5893	12.4631	12.9595
ENSBTAG00000016598	ENSBTAT00000044652	-0.179529	0.0879305	42.013	40.9307	40.0401	43.3847	47.6625	48.2337
ENSBTAG00000031327	ENSBTAT00000044388	0.05442	0.321802	6.10828	5.83814	6.83615	5.4794	6.06254	6.54533
ENSBTAG00000007187	ENSBTAT00000012349	0.263563	6.56987e-05	15.9716	17.5396	16.467	13.3607	14.9733	13.2993
ENSBTAG00000046346	ENSBTAT00000062993	0.321341	8.72578e-08	16.5387	16.958	16.3248	12.8954	13.4566	13.5215
ENSBTAG00000046346	ENSBTAT00000062993	0.321341	8.72578e-08	16.5387	16.958	16.3248	12.8954	13.4566	13.5215
ENSBTAG00000047606	ENSBTAT00000064416	-0.368523	3.84533e-05	12.2719	13.4473	13.1875	16.3295	17.2555	16.6448
ENSBTAG00000051673	ENSBTAT00000066608	0.192607	0.00498969	130.743	157.111	127.228	118.166	120.592	124.448
ENSBTAG00000051673	ENSBTAT00000066608	0.192607	0.00498969	130.743	157.111	127.228	118.166	120.592	124.448
ENSBTAG00000047229	ENSBTAT00000063903	0.0914889	0.327761	73.0139	90.9803	69.6401	60.9739	63.6438	94.6606
ENSBTAG00000048501	ENSBTAT00000077891	1.34208	7.66379e-79	14.5961	14.2571	14.2997	5.67926	5.944	5.39845
ENSBTAG00000003300	ENSBTAT00000004272	0.253608	5.77931e-05	184.692	208.208	182.016	161.635	156.158	164.444
ENSBTAG00000002440	ENSBTAT00000009103	0.0282663	0.303547	7.08956	6.80689	7.46477	7.12338	7.1557	6.66768
ENSBTAG00000016881	ENSBTAT00000022456	0.870074	3.59329e-10	3.89099	5.10217	3.51857	2.33077	2.10096	2.41368
ENSBTAG00000001407	ENSBTAT00000001846	0.00974431	0.436526	17.6764	17.1235	17.4296	17.7556	15.9442	18.1782
ENSBTAG00000002939	ENSBTAT00000003826	-0.186782	0.0932531	21.7095	21.8971	19.6041	23.6211	23.2532	25.0736
ENSBTAG00000013060	ENSBTAT00000076125	0.266274	3.54777e-06	148.823	157.27	150.615	130.521	128.084	121.132
ENSBTAG00000013060	ENSBTAT00000076125	0.266274	3.54777e-06	148.823	157.27	150.615	130.521	128.084	121.132
ENSBTAG00000015398	ENSBTAT00000038824	0.461661	1.60221e-14	43.5965	43.2505	43.3172	31.2275	32.6225	30.6687
ENSBTAG00000015398	ENSBTAT00000038824	0.461661	1.60221e-14	43.5965	43.2505	43.3172	31.2275	32.6225	30.6687
ENSBTAG00000021021	ENSBTAT00000027992	-0.240649	0.117767	2.94768	3.29136	2.97453	3.41662	3.73824	3.73119
ENSBTAG00000015779	ENSBTAT00000070043	-0.28015	0.07142	1.82072	1.48615	1.78947	1.91336	2.29898	1.97625
ENSBTAG00000009086	ENSBTAT00000011978	-0.23883	0.0300537	48.9032	56.173	50.1046	58.2421	59.1397	65.7369
ENSBTAG00000021304	ENSBTAT00000028388	-0.267224	0.0020624	11.9122	11.9022	12.1489	14.6723	14.6154	13.9938
ENSBTAG00000017196	ENSBTAT00000022854	-0.775593	7.41451e-25	386.252	404.654	378.126	690.419	673.408	637.431
ENSBTAG00000018019	ENSBTAT00000023987	-1.77723	2.99386e-07	0.056459	0.136313	0.085614	0.406193	0.288891	0.259135
ENSBTAG00000018310	ENSBTAT00000024364	0.117513	0.0182998	21.3748	20.7118	20.4974	19.3191	20.2384	18.1309
ENSBTAG00000016456	ENSBTAT00000080932	0.0397073	0.161709	13.922	14.0195	13.8626	13.102	13.8997	13.6676
ENSBTAG00000016456	ENSBTAT00000080932	0.0397073	0.161709	13.922	14.0195	13.8626	13.102	13.8997	13.6676
ENSBTAG00000016456	ENSBTAT00000080932	0.0397073	0.161709	13.922	14.0195	13.8626	13.102	13.8997	13.6676
ENSBTAG00000016456	ENSBTAT00000021879	0.0397073	0.161709	13.922	14.0195	13.8626	13.102	13.8997	13.6676
ENSBTAG00000003559	ENSBTAT00000004631	0.364823	0.0211761	0.746868	0.810388	0.743244	0.552547	0.604813	0.629126
ENSBTAG00000048906	ENSBTAT00000070434	0.811657	1.14549e-14	1.04923	1.10221	1.03153	0.577578	0.68258	0.553266
ENSBTAG00000007319	ENSBTAT00000074392	0.170705	0.348282	0.425859	0.405403	0.364184	0.289446	0.29843	0.474168
ENSBTAG00000017547	ENSBTAT00000023325	0.0603918	0.0988455	35.8352	35.8091	35.8801	34.3136	33.3821	35.4206
ENSBTAG00000017426	ENSBTAT00000023165	0.183033	0.000545946	92.9465	90.1829	92.9057	84.7847	81.9977	76.3628
ENSBTAG00000007732	ENSBTAT00000072191	1.18694	2.73508e-62	15.2816	15.078	15.3093	6.4478	7.12893	6.48268
ENSBTAG00000016760	ENSBTAT00000072976	-0.158497	0.136655	31.2751	30.1106	30.9313	33.7586	35.5774	33.7012
ENSBTAG00000021452	ENSBTAT00000065280	-0.246862	0.011402	7.82503	7.1072	7.89966	8.49335	9.56635	9.03314
ENSBTAG00000019106	ENSBTAT00000025437	0.114083	0.0160345	68.613	66.3087	66.1641	62.9028	60.9519	61.9424
ENSBTAG00000018057	ENSBTAT00000024037	0.0234459	0.648761	2.62417	3.02818	3.24456	2.95489	3.0723	2.7263
ENSBTAG00000003165	ENSBTAT00000004113	-1.11401	5.5088e-40	3.34296	3.48653	3.58526	7.83927	7.44663	7.25642
ENSBTAG00000014784	ENSBTAT00000019665	-0.455334	1.044e-05	35.1405	41.1952	34.3127	48.2143	49.2602	54.2355
ENSBTAG00000013442	ENSBTAT00000017882	0.289448	1	0.021069	0.065893	0.13293	0.020719	0.087685	0.071515
ENSBTAG00000000670	ENSBTAT00000000891	-0.196407	0.171139	6.35969	6.17914	6.35498	6.87512	6.85075	7.92344
ENSBTAG00000006501	ENSBTAT00000030668	0.114699	0.0292926	9.53425	9.36506	10.2398	9.16675	8.4539	9.29154
ENSBTAG00000054195	ENSBTAT00000080370	0.0544552	0.274342	77.1469	92.3086	79.1257	75.9212	72.8359	90.6162
ENSBTAG00000022635	ENSBTAT00000057452	0.303565	1.61111e-07	36.9774	37.0521	36.1799	29.6241	29.2208	30.452
ENSBTAG00000000191	ENSBTAT00000000217	0.344881	3.07349e-05	11.2716	11.8692	12.0902	9.74891	9.31375	8.67729
ENSBTAG00000014205	ENSBTAT00000018886	-0.232866	0.0148004	34.6314	34.5977	34.4567	41.6229	41.5508	38.6744
ENSBTAG00000021846	ENSBTAT00000029126	0.0238385	0.67552	0.316777	0.300738	0.282299	0.273868	0.362046	0.249154
ENSBTAG00000019096	ENSBTAT00000025422	-0.318636	0.00220723	55.2578	59.9146	56.178	68.1685	66.4594	79.0718
ENSBTAG00000013407	ENSBTAT00000085890	0.0738535	0.22963	2.51848	2.8609	2.39998	2.35923	2.37619	2.65572
ENSBTAG00000015839	ENSBTAT00000021049	-0.105569	0.458156	64.3763	63.4765	63.6481	69.8634	69.9189	66.2571
ENSBTAG00000031567	ENSBTAT00000044741	-0.396999	1.01564e-06	20.6181	20.0158	20.7111	27.4195	28.0679	25.2896
ENSBTAG00000002774	ENSBTAT00000003600	0.131739	0.0226957	9.60901	9.29486	9.59186	8.18004	8.40132	9.42757
ENSBTAG00000008394	ENSBTAT00000011047	1.06265	5.28015e-05	0.702888	0.472842	0.494762	0.250779	0.256509	0.292465
ENSBTAG00000031287	ENSBTAT00000044329	0.775654	4.32669e-15	11.4302	10.7108	11.1669	6.36972	7.08997	5.99622
ENSBTAG00000028443	ENSBTAT00000040824	0.0792055	1	0.524932	0	0.191937	0.091122	0.426508	0.160943
ENSBTAG00000003237	ENSBTAT00000004201	0.171726	0.00600119	4.31425	4.04263	4.29066	3.59112	3.78427	3.85285
ENSBTAG00000003242	ENSBTAT00000085097	-0.504254	0.000156232	1.45545	1.29444	1.38175	1.9036	2.1648	1.79187
ENSBTAG00000005327	ENSBTAT00000049275	-1.37008	2.06101e-16	1.25299	1.55329	1.6144	3.69641	3.77858	3.9518
ENSBTAG00000007966	ENSBTAT00000030820	0.89778	2.6361e-12	3.97695	4.09882	3.25132	2.32149	1.92643	1.83147
ENSBTAG00000007964	ENSBTAT00000070990	-0.486859	2.77132e-09	37.6833	36.309	40.0682	52.0586	52.613	55.1717
ENSBTAG00000053030	ENSBTAT00000080709	1.532	1	0.295791	0.372329	0.428623	0.151787	0.165169	0.062295
ENSBTAG00000011287	ENSBTAT00000014996	-0.00529757	0.670761	3.86545	4.78427	4.81445	4.20516	4.8225	4.48604
ENSBTAG00000014779	ENSBTAT00000019661	-0.0218848	0.65009	9.76959	9.49422	9.79773	9.74457	9.58287	10.1783
ENSBTAG00000004118	ENSBTAT00000005380	0.554605	1.22684e-15	66.4837	66.4571	63.0481	41.2473	45.1837	47.0067
ENSBTAG00000032304	ENSBTAT00000024787	-0.50384	0.000124428	7.82964	7.29844	7.33657	9.72854	10.0971	12.0288
ENSBTAG00000034796	ENSBTAT00000083114	-0.0151451	0.719393	5.42401	6.86064	5.51094	5.76598	5.51614	6.70127
ENSBTAG00000020645	ENSBTAT00000027511	-0.424928	1.99645e-05	112.684	126.904	111.836	149.049	150.346	172.394
ENSBTAG00000011580	ENSBTAT00000078428	0.0020459	0.481303	30.8841	33.9237	29.5513	30.5525	30.0535	33.6193
ENSBTAG00000022632	ENSBTAT00000030664	0.376893	0.000127491	19.6512	17.9957	16.6047	13.4525	12.2833	16.0431
ENSBTAG00000015833	ENSBTAT00000030623	-0.116322	0.440325	11.2821	11.2199	10.8022	12.5672	12.1014	11.4321
ENSBTAG00000002774	ENSBTAT00000003600	0.131739	0.0226957	9.60901	9.29486	9.59186	8.18004	8.40132	9.42757
ENSBTAG00000002774	ENSBTAT00000003600	0.131739	0.0226957	9.60901	9.29486	9.59186	8.18004	8.40132	9.42757
ENSBTAG00000018331	ENSBTAT00000075737	-1.3511	4.83072e-12	2.2833	3.042	2.84858	6.41746	5.89025	8.54433
ENSBTAG00000019121	ENSBTAT00000036487	0.0465393	0.269098	7.3108	7.77905	8.13209	6.90251	7.48875	8.09353
ENSBTAG00000015273	ENSBTAT00000044086	-0.731433	1.37882e-11	3.63436	3.29654	3.36745	5.85309	5.35691	5.88823
ENSBTAG00000018238	ENSBTAT00000024279	0.114885	0.108297	5.9815	6.21819	5.83737	5.5506	5.21674	5.88909
ENSBTAG00000021237	ENSBTAT00000061451	-0.306447	0.000477405	26.345	23.5383	26.4276	30.6434	32.7883	30.9388
ENSBTAG00000021237	ENSBTAT00000061451	-0.306447	0.000477405	26.345	23.5383	26.4276	30.6434	32.7883	30.9388
ENSBTAG00000021237	ENSBTAT00000061451	-0.306447	0.000477405	26.345	23.5383	26.4276	30.6434	32.7883	30.9388
ENSBTAG00000011074	ENSBTAT00000014704	0.0530758	0.11051	90.9756	92.0466	87.1585	88.6811	87.2084	84.532
ENSBTAG00000018884	ENSBTAT00000054269	0.0399575	0.220734	19.3326	18.8066	19.6594	17.932	18.3095	19.9782
ENSBTAG00000001631	ENSBTAT00000002136	-2.53641	4.80891e-77	1.29704	1.42558	1.18974	6.88516	7.67836	8.13373
ENSBTAG00000001634	ENSBTAT00000002140	0.0132285	0.468492	6.45365	7.52773	6.75532	6.74428	7.42842	6.37473
ENSBTAG00000034529	ENSBTAT00000048910	-0.785351	1.34138e-19	12.504	11.9183	11.4228	20.5594	20.1032	21.1167
ENSBTAG00000034529	ENSBTAT00000048910	-0.785351	1.34138e-19	12.504	11.9183	11.4228	20.5594	20.1032	21.1167
ENSBTAG00000017542	ENSBTAT00000070171	-0.234388	0.0278608	9.18176	9.39583	8.82407	10.6936	10.3877	11.1542
ENSBTAG00000017542	ENSBTAT00000070171	-0.234388	0.0278608	9.18176	9.39583	8.82407	10.6936	10.3877	11.1542
ENSBTAG00000017542	ENSBTAT00000070171	-0.234388	0.0278608	9.18176	9.39583	8.82407	10.6936	10.3877	11.1542
ENSBTAG00000019492	ENSBTAT00000038911	-0.0315152	0.826185	4.89729	4.45821	4.88614	4.66719	5.27497	4.614
ENSBTAG00000000396	ENSBTAT00000000511	-0.203084	0.175569	13.0248	17.0501	14.0445	18.7161	16.3118	15.7604
ENSBTAG00000000527	ENSBTAT00000036100	-0.0288021	0.704486	34.1304	33.741	33.7868	32.9163	34.7796	36.0122
ENSBTAG00000014211	ENSBTAT00000018905	-0.93624	3.77559e-31	8.93652	9.16438	8.69398	16.7468	16.7584	17.7677
ENSBTAG00000019343	ENSBTAT00000067738	-1.02715	5.93146e-19	5.44201	5.10425	4.74124	10.067	10.0319	11.057
ENSBTAG00000019343	ENSBTAT00000067738	-1.02715	5.93146e-19	5.44201	5.10425	4.74124	10.067	10.0319	11.057
ENSBTAG00000015900	ENSBTAT00000021132	-0.161646	0.356765	10.4337	11.8684	10.5643	11.8184	11.511	13.4337
ENSBTAG00000005533	ENSBTAT00000007277	-0.202094	0.0515432	17.0686	17.5722	16.6834	19.4961	19.2706	20.2749
ENSBTAG00000012755	ENSBTAT00000016955	0.0727475	0.188595	8.75887	8.22399	8.10464	7.47764	7.96994	8.40627
ENSBTAG00000012761	ENSBTAT00000016963	-0.455577	9.20832e-07	51.6104	49.8283	49.6728	62.8871	68.235	76.1018
ENSBTAG00000012777	ENSBTAT00000016981	-0.273771	0.00829644	13.0425	14.5542	14.0671	16.9195	15.7258	17.7246
ENSBTAG00000012777	ENSBTAT00000016981	-0.273771	0.00829644	13.0425	14.5542	14.0671	16.9195	15.7258	17.7246
ENSBTAG00000019908	ENSBTAT00000026522	0.0116438	0.420592	3.60808	3.38229	3.48759	3.48182	3.42827	3.48365
ENSBTAG00000011189	ENSBTAT00000071156	0.13862	0.0776119	4.57557	4.37668	4.33353	3.79306	3.85208	4.4235
ENSBTAG00000015131	ENSBTAT00000035955	-0.0245255	0.663165	81.451	80.8403	75.1536	79.7789	78.6608	83.0762
ENSBTAG00000004104	ENSBTAT00000066565	-0.597291	1.30916e-12	14.141	14.694	14.5883	22.0313	23.6136	20.0491
ENSBTAG00000004104	ENSBTAT00000068695	-0.597291	1.30916e-12	14.141	14.694	14.5883	22.0313	23.6136	20.0491
ENSBTAG00000015083	ENSBTAT00000020074	-0.00254487	0.510967	19.009	17.9274	19.4933	19.3591	19.9389	17.2313
ENSBTAG00000014420	ENSBTAT00000065259	-0.641908	0.00940003	0.561316	0.584243	0.599778	1.00833	0.776355	0.938726
ENSBTAG00000005587	ENSBTAT00000007339	0.130099	0.0177854	10.793	10.4758	10.227	9.18307	9.79052	9.80622
ENSBTAG00000005676	ENSBTAT00000074923	0.00801772	0.423898	8.94195	8.84274	8.12387	8.77881	8.66416	8.32201
ENSBTAG00000000578	ENSBTAT00000000755	0.212793	0.0016755	18.1021	19.9897	19.805	16.2797	15.9192	17.7581
ENSBTAG00000019685	ENSBTAT00000035789	-0.0567207	0.998444	47.122	51.5397	46.3164	50.996	50.9483	48.8473
ENSBTAG00000007075	ENSBTAT00000081596	0.019485	0.295048	17.0023	17.0545	16.954	17.2353	16.214	16.8772
ENSBTAG00000025526	ENSBTAT00000035900	0.0215056	0.282808	15.9502	16.468	15.3678	16.3506	15.6286	15.0998
ENSBTAG00000039695	ENSBTAT00000009151	-0.0690685	0.859978	24.1839	24.2009	23.4668	25.2949	25.944	24.1362
ENSBTAG00000006960	ENSBTAT00000009148	0.167851	0.00926544	7.66622	7.76718	7.73452	6.73087	6.65452	7.23795
ENSBTAG00000006960	ENSBTAT00000009148	0.167851	0.00926544	7.66622	7.76718	7.73452	6.73087	6.65452	7.23795
ENSBTAG00000017239	ENSBTAT00000022907	-0.078761	0.813969	4.40422	4.04928	4.42074	4.21187	4.71452	4.67023
ENSBTAG00000000871	ENSBTAT00000001158	0.0189967	0.356039	18.6466	19.4361	19.8468	17.8932	19.9039	19.3746
ENSBTAG00000012939	ENSBTAT00000057192	-0.000440943	0.619525	13.9986	15.8129	12.991	13.3322	13.6391	15.8443
ENSBTAG00000019237	ENSBTAT00000076880	-0.0237751	0.657011	146.875	154.323	146.795	146.306	149.597	159.535
ENSBTAG00000050155	ENSBTAT00000071179	-0.269904	0.00313844	80.9738	88.8099	82.7363	101.754	100.516	102.2
ENSBTAG00000003039	ENSBTAT00000003955	-1.00183	8.94011e-08	4.48855	5.26986	3.20885	9.26911	8.63515	8.06325
ENSBTAG00000008191	ENSBTAT00000010771	-0.0226243	0.669989	111.514	117.995	113.12	114.558	108.808	124.679
ENSBTAG00000002643	ENSBTAT00000003427	0.0199739	0.335717	12.0636	11.9039	11.4419	12.0917	11.6666	11.1643
ENSBTAG00000016828	ENSBTAT00000022386	-0.370101	6.49327e-05	39.6331	43.2522	36.8212	52.2954	51.5089	50.9096
ENSBTAG00000016830	ENSBTAT00000022388	-0.184995	0.0897671	23.2072	26.1397	24.241	28.5926	27.4779	27.5852
ENSBTAG00000001634	ENSBTAT00000002140	0.0132285	0.468492	6.45365	7.52773	6.75532	6.74428	7.42842	6.37473
ENSBTAG00000019495	ENSBTAT00000025965	-0.141587	0.217135	29.5151	29.6841	28.7805	31.705	32.8968	32.4502
ENSBTAG00000019495	ENSBTAT00000086634	-0.141587	0.217135	29.5151	29.6841	28.7805	31.705	32.8968	32.4502
ENSBTAG00000034287	ENSBTAT00000024623	-0.280098	0.345348	0.654989	0.644212	0.70475	0.995187	0.647772	0.790393
ENSBTAG00000008981	ENSBTAT00000011820	0.214122	0.263467	0.584242	0.676375	0.584755	0.657347	0.454537	0.478957
ENSBTAG00000051116	ENSBTAT00000073204	1.97052	4.12239e-24	0.741822	0.778923	0.84134	0.233203	0.168137	0.20137
ENSBTAG00000051116	ENSBTAT00000073204	1.97052	4.12239e-24	0.741822	0.778923	0.84134	0.233203	0.168137	0.20137
ENSBTAG00000012749	ENSBTAT00000061262	-0.1079	0.4888	20.8184	22.063	19.6444	22.0129	22.7168	22.6518
ENSBTAG00000010217	ENSBTAT00000013479	0.187334	0.00417202	6.60956	6.68774	7.27141	6.47242	6.167	5.42459
ENSBTAG00000005850	ENSBTAT00000007690	1.85131	5.67835e-17	2.17409	1.84427	1.79513	0.473328	0.665286	0.472536
ENSBTAG00000018967	ENSBTAT00000025243	0.0119113	0.406642	38.0476	40.5603	36.0552	36.9104	36.1533	40.6567
ENSBTAG00000009302	ENSBTAT00000046658	-0.383766	9.04668e-06	19.7297	19.9713	20.8284	27.207	27.4485	24.3198
ENSBTAG00000009112	ENSBTAT00000012010	-0.364262	4.96517e-05	37.332	39.1986	36.606	47.6849	47.8627	50.0843
ENSBTAG00000006864	ENSBTAT00000045468	3.96806	1.0764e-48	0.48925	0.539406	0.61572	0.033623	0.037459	0.033992
ENSBTAG00000005589	ENSBTAT00000007341	0.740042	6.96245e-18	11.458	12.3737	13.4222	7.30508	7.77699	7.22268
ENSBTAG00000005587	ENSBTAT00000007339	0.130099	0.0177854	10.793	10.4758	10.227	9.18307	9.79052	9.80622
ENSBTAG00000008837	ENSBTAT00000045545	-0.158062	0.166156	74.4138	81.9209	78.6689	86.0915	86.8817	89.2408
ENSBTAG00000010698	ENSBTAT00000014160	-0.0429123	0.892819	4.28313	4.14462	4.30035	4.16376	4.44275	4.50587
ENSBTAG00000006958	ENSBTAT00000035893	0.023977	0.523834	4.535	4.4555	4.60484	3.92048	4.95994	4.49084
ENSBTAG00000006958	ENSBTAT00000035893	0.023977	0.523834	4.535	4.4555	4.60484	3.92048	4.95994	4.49084
ENSBTAG00000006941	ENSBTAT00000009133	0.149187	0.0749654	3.69801	3.8669	4.00764	3.51632	3.31112	3.6082
ENSBTAG00000020116	ENSBTAT00000011795	-0.0432414	0.941788	6.26461	6.97913	5.65674	4.82035	6.62385	8.03135
ENSBTAG00000031869	ENSBTAT00000035587	0.0338802	0.386774	4.28948	4.74464	4.5432	4.71299	4.36467	4.18454
ENSBTAG00000016924	ENSBTAT00000022510	0.436937	5.29556e-11	38.1376	34.642	37.7488	28.7387	26.055	26.8538
ENSBTAG00000015396	ENSBTAT00000038477	0.472569	2.04466e-10	34.9233	32.4509	32.4354	24.069	26.3155	21.5462
ENSBTAG00000000786	ENSBTAT00000072063	0.064761	0.297369	11.9786	12.0071	12.7216	11.0942	10.5011	13.5006
ENSBTAG00000013221	ENSBTAT00000017595	0.146582	0.1242	0.987183	1.00345	1.06573	0.99137	0.933551	0.836162
ENSBTAG00000021583	ENSBTAT00000028761	-0.0151629	0.63036	11.8707	12.3507	11.3191	12.7865	12.2502	10.8794
ENSBTAG00000050380	ENSBTAT00000068462	0.121427	0.0852514	4.25757	4.24844	4.18535	3.76893	3.78731	4.11064
ENSBTAG00000024015	ENSBTAT00000085262	1.31415	2.64879e-70	11.6592	11.348	10.7092	4.36148	4.66552	4.53241
ENSBTAG00000021250	ENSBTAT00000081735	-0.0659415	0.900003	26.4855	28.0507	26.2698	28.8135	28.383	27.3886
ENSBTAG00000013588	ENSBTAT00000079285	-0.109575	0.47987	9.84876	10.1071	9.28372	10.3862	10.6301	10.5306
ENSBTAG00000000656	ENSBTAT00000084092	0.315666	0.000760828	3.90354	3.81226	3.38812	2.6369	3.18842	3.09646
ENSBTAG00000001224	ENSBTAT00000010477	-0.0366366	0.811851	8.0627	7.46765	7.90189	7.96114	8.28225	7.79152
ENSBTAG00000007520	ENSBTAT00000009897	-0.299943	0.00201476	12.3738	12.8173	11.7455	16.1077	14.6923	14.6726
ENSBTAG00000003035	ENSBTAT00000048179	-0.0530454	0.974948	9.0022	8.61328	9.05818	9.5044	9.17954	8.98872
ENSBTAG00000007467	ENSBTAT00000009822	0.207685	0.000209918	39.2378	36.1203	40.0105	32.3423	33.6114	33.9468
ENSBTAG00000019251	ENSBTAT00000061281	0.374778	7.67317e-08	17.6894	19.0747	17.6621	14.8679	14.3963	12.7105
ENSBTAG00000002128	ENSBTAT00000084364	-0.149232	0.530328	2.48874	2.19119	2.20587	2.42071	2.42716	2.78834
ENSBTAG00000012441	ENSBTAT00000068440	0.563163	1.82651e-06	5.00444	6.33367	6.83117	4.31535	4.26499	3.71692
ENSBTAG00000019455	ENSBTAT00000061584	2.06405	1.18438e-34	1.23337	1.26664	1.06283	0.277156	0.289216	0.285659
ENSBTAG00000037457	ENSBTAT00000053498	-0.0922701	0.605393	49.3128	46.38	48.1767	52.968	51.3182	49.0854
ENSBTAG00000016567	ENSBTAT00000022040	0.34411	1	0.601745	0.8549	0.654606	0.320275	0.631476	0.71148
ENSBTAG00000016571	ENSBTAT00000022045	0.0428556	0.294551	3.1979	3.69216	3.4056	3.28427	3.47092	3.23914
ENSBTAG00000016571	ENSBTAT00000022045	0.0428556	0.294551	3.1979	3.69216	3.4056	3.28427	3.47092	3.23914
ENSBTAG00000016590	ENSBTAT00000047964	-0.183441	0.328653	12.2756	13.8253	12.9509	15.0034	12.6585	16.6849
ENSBTAG00000016590	ENSBTAT00000047964	-0.183441	0.328653	12.2756	13.8253	12.9509	15.0034	12.6585	16.6849
ENSBTAG00000016591	ENSBTAT00000022068	0.0358196	0.420814	4.13003	3.96969	4.10689	3.88799	3.72504	4.29425
ENSBTAG00000016592	ENSBTAT00000022070	-0.100668	0.728248	2.20046	1.98221	2.48647	2.41835	2.09358	2.63919
ENSBTAG00000004551	ENSBTAT00000005979	-0.337866	0.00411313	6.74381	6.79683	6.1904	7.81232	8.77129	8.35419
ENSBTAG00000017284	ENSBTAT00000022975	1.00681	6.75374e-09	4.03256	4.80894	4.65248	1.87013	2.42556	2.41952
ENSBTAG00000019136	ENSBTAT00000025473	0.190151	0.0120522	34.339	37.5171	32.6203	28.3649	28.3121	34.8981
ENSBTAG00000002481	ENSBTAT00000003220	0.203559	0.0339896	6.94008	6.76147	7.08255	5.48038	5.79319	6.77545
ENSBTAG00000000177	ENSBTAT00000000202	-0.178134	0.348314	5.86949	6.82343	5.30885	6.92257	7.08608	6.35891
ENSBTAG00000014118	ENSBTAT00000018766	-0.0581204	0.981744	10.4519	10.2141	10.8043	10.8412	10.8675	11.0554
ENSBTAG00000014118	ENSBTAT00000018766	-0.0581204	0.981744	10.4519	10.2141	10.8043	10.8412	10.8675	11.0554
ENSBTAG00000002211	ENSBTAT00000002865	0.0940105	0.0756885	8.5734	7.25043	8.22131	7.1834	7.6735	7.67135
ENSBTAG00000016561	ENSBTAT00000022029	-0.289151	0.0980012	4.2823	4.56828	5.39949	5.07582	5.81776	6.51888
ENSBTAG00000020366	ENSBTAT00000070829	-0.10662	0.584439	8.15674	8.11546	7.27508	8.21479	8.73556	8.40306
ENSBTAG00000020617	ENSBTAT00000076792	0.269335	5.52743e-05	11.1549	10.9917	10.3526	8.74675	8.59052	9.62736
ENSBTAG00000009961	ENSBTAT00000084562	0.354417	0.00158706	3.15682	3.13995	2.83162	2.34417	2.59692	2.199
ENSBTAG00000024884	ENSBTAT00000034643	-1.17925	2.65783e-20	1.1463	1.16305	1.23479	2.55396	2.95066	2.5214
ENSBTAG00000005458	ENSBTAT00000007182	0.586213	7.97737e-14	6.10539	6.43831	5.80478	4.06918	3.94514	4.2074
ENSBTAG00000001022	ENSBTAT00000001355	1.70575	8.7195e-11	7.80284	23.1453	19.2777	4.51644	6.04137	4.8395
ENSBTAG00000001022	ENSBTAT00000001355	1.70575	8.7195e-11	7.80284	23.1453	19.2777	4.51644	6.04137	4.8395
ENSBTAG00000001022	ENSBTAT00000084975	1.70575	8.7195e-11	7.80284	23.1453	19.2777	4.51644	6.04137	4.8395
ENSBTAG00000006117	ENSBTAT00000008039	0.665641	2.28564e-06	1.87045	1.36919	1.59528	0.996493	1.0649	0.986582
ENSBTAG00000053667	ENSBTAT00000069943	0.144339	0.390788	2.13856	1.88356	1.73308	2.05377	1.87293	1.28058
ENSBTAG00000004875	ENSBTAT00000072301	-0.0629275	0.940987	10.9959	12.2907	10.9067	12.0835	10.4509	13.1833
ENSBTAG00000004875	ENSBTAT00000006410	-0.0629275	0.940987	10.9959	12.2907	10.9067	12.0835	10.4509	13.1833
ENSBTAG00000020107	ENSBTAT00000026784	0.0373084	0.640754	2.44119	2.12058	2.89031	2.34373	2.68881	2.22932
ENSBTAG00000009199	ENSBTAT00000012119	0.832317	5.49783e-28	29.5379	32.4462	28.2167	16.2157	16.8095	17.634
ENSBTAG00000006590	ENSBTAT00000008652	-0.280397	0.103453	4.36792	4.97542	4.82193	5.00156	5.72154	6.48102
ENSBTAG00000050423	ENSBTAT00000076797	-1.01325	1	0.043331	0.012202	0	0	0.02601	0.086081
ENSBTAG00000017662	ENSBTAT00000023487	-0.322505	0.000186621	18.3876	18.391	18.5109	23.5205	24.0466	21.5723
ENSBTAG00000009441	ENSBTAT00000012423	-0.00115478	0.456219	14.8602	14.8946	15.9983	15.3923	16.2004	14.1971
ENSBTAG00000009441	ENSBTAT00000012423	-0.00115478	0.456219	14.8602	14.8946	15.9983	15.3923	16.2004	14.1971
ENSBTAG00000019530	ENSBTAT00000026023	0.212511	0.110864	2.10899	2.14927	2.74127	2.00097	2.03867	2.00119
ENSBTAG00000006542	ENSBTAT00000008595	0.291804	0.00179668	6.51844	6.30721	6.79806	5.4673	4.80581	5.75711
ENSBTAG00000006541	ENSBTAT00000008593	0.766379	1.0541e-31	45.0977	41.599	44.4794	25.094	26.3493	25.6739
ENSBTAG00000016156	ENSBTAT00000021507	-0.155296	0.244925	35.5883	41.2003	34.9553	43.0264	39.5028	41.9144
ENSBTAG00000009047	ENSBTAT00000011920	0.357358	0.00166638	15.8898	15.9496	14.3891	11.024	10.9143	14.1473
ENSBTAG00000015982	ENSBTAT00000021258	0.572974	1.61074e-06	5.22128	4.72269	4.88123	3.22135	3.48357	3.26102
ENSBTAG00000009099	ENSBTAT00000011995	0.0531796	0.341423	5.0663	5.88236	4.68643	5.00948	5.25801	4.80176
ENSBTAG00000031789	ENSBTAT00000011996	-0.0106521	0.623182	9.84781	11.5059	9.42797	10.1607	10.0786	10.7704
ENSBTAG00000054329	ENSBTAT00000078918	-0.0700001	0.909214	8.86362	9.19986	9.3696	8.88366	10.4346	9.47869
ENSBTAG00000003421	ENSBTAT00000004443	-0.136629	0.299928	10.3319	9.9454	9.97435	11.5074	10.7267	11.0226
ENSBTAG00000003421	ENSBTAT00000004443	-0.136629	0.299928	10.3319	9.9454	9.97435	11.5074	10.7267	11.0226
ENSBTAG00000040555	ENSBTAT00000070563	-0.46733	0.000451235	2.25265	2.63743	2.07649	3.24331	3.23309	3.15522
ENSBTAG00000002345	ENSBTAT00000003027	-0.0726564	0.845196	2.46019	2.40563	2.41423	2.55399	2.5279	2.57418
ENSBTAG00000007523	ENSBTAT00000009899	0.0606	0.166554	13.8568	13.2701	13.3479	13.1821	12.5281	13.0996
ENSBTAG00000002391	ENSBTAT00000003094	-0.10984	0.440572	31.907	33.176	32.0966	35.0696	34.681	35.1168
ENSBTAG00000009153	ENSBTAT00000012060	0.953423	4.33896e-09	2.40357	2.7465	2.64456	1.55607	1.03079	1.43832
ENSBTAG00000005089	ENSBTAT00000063604	0.280256	0.00236848	6.53357	6.40131	5.90798	5.52252	4.74397	5.24958
ENSBTAG00000052078	ENSBTAT00000083187	0.143102	0.202884	2.39921	3.10695	3.17668	2.57495	2.86434	2.42363
ENSBTAG00000005446	ENSBTAT00000007165	-0.101255	0.763165	6.13982	6.91629	6.17528	5.92395	6.40568	8.3
ENSBTAG00000001134	ENSBTAT00000001510	-0.235302	0.0185656	13.9007	12.1876	14.1251	15.5108	15.9706	15.8559
ENSBTAG00000003160	ENSBTAT00000074286	-0.0834026	0.767515	6.15836	6.13833	5.59924	6.14756	6.59785	6.21557
ENSBTAG00000003160	ENSBTAT00000074286	-0.0834026	0.767515	6.15836	6.13833	5.59924	6.14756	6.59785	6.21557
ENSBTAG00000016190	ENSBTAT00000021549	0.178842	0.119018	2.473	2.97374	2.88	2.42544	2.35712	2.57337
ENSBTAG00000020440	ENSBTAT00000027241	0.269201	0.00183279	4.78175	4.49718	4.41047	3.64185	3.74242	3.97491
ENSBTAG00000021248	ENSBTAT00000028313	-0.15923	0.356661	5.43599	5.39144	5.23345	5.44447	6.12428	6.36628
ENSBTAG00000053996	ENSBTAT00000086209	1.41257	3.71232e-09	0.337061	0.415311	0.408535	0.17769	0.123497	0.134899
ENSBTAG00000010264	ENSBTAT00000046646	-0.108819	0.620711	2.49794	2.05198	2.17235	2.38408	2.38666	2.47819
ENSBTAG00000037400	ENSBTAT00000082441	0.0549989	0.109953	7.22286	6.92863	6.93153	6.65648	6.78972	6.84821
ENSBTAG00000037400	ENSBTAT00000028865	0.0549989	0.109953	7.22286	6.92863	6.93153	6.65648	6.78972	6.84821
ENSBTAG00000014503	ENSBTAT00000019288	-0.117171	0.479043	6.0083	6.13096	6.90989	7.15034	6.74387	6.76661
ENSBTAG00000005934	ENSBTAT00000007792	-0.85176	2.699e-30	16.5936	15.285	16.1414	28.5481	29.8222	28.2913
ENSBTAG00000000642	ENSBTAT00000000845	-0.180366	0.126625	7.16819	7.76016	7.1475	7.94612	8.21017	8.85944
ENSBTAG00000019805	ENSBTAT00000026388	0.429827	1.72419e-08	7.45288	7.58884	7.11432	5.37255	5.61269	5.46231
ENSBTAG00000016564	ENSBTAT00000022032	-0.146455	0.51301	2.90401	3.40765	2.77179	3.1706	3.22962	3.65375
ENSBTAG00000016568	ENSBTAT00000022041	0.0688031	0.118515	31.647	28.9235	33.1848	28.1838	30.4962	30.709
ENSBTAG00000038330	ENSBTAT00000057315	0.322518	7.31322e-05	38.605	42.281	37.8547	29.9604	30.1622	34.8311
ENSBTAG00000002470	ENSBTAT00000003211	-0.310476	0.251443	0.928962	0.652506	0.657298	1.05867	0.819452	0.898209
ENSBTAG00000019745	ENSBTAT00000066947	0.0381123	0.496834	2.53843	3.05644	2.30395	2.15366	2.82025	2.71897
ENSBTAG00000020619	ENSBTAT00000027480	0.691829	2.7995e-25	13.4798	13.6012	13.1744	7.89173	8.39781	8.63135
ENSBTAG00000037500	ENSBTAT00000054214	0.00292612	1	0.1054	0.083205	0.109493	0.08909	0.086358	0.122046
ENSBTAG00000012683	ENSBTAT00000037527	-0.180427	0.0627445	59.1435	57.7855	58.3324	66.0286	68.6024	63.9786
ENSBTAG00000012683	ENSBTAT00000037527	-0.180427	0.0627445	59.1435	57.7855	58.3324	66.0286	68.6024	63.9786
ENSBTAG00000012683	ENSBTAT00000037527	-0.180427	0.0627445	59.1435	57.7855	58.3324	66.0286	68.6024	63.9786
ENSBTAG00000002367	ENSBTAT00000031534	-0.2504	0.108754	21.6691	24.6976	21.5068	26.2763	23.9728	30.489
ENSBTAG00000004509	ENSBTAT00000005923	0.125444	0.0508468	4.07444	3.76998	3.52233	3.42489	3.53374	3.46152
ENSBTAG00000026403	ENSBTAT00000005092	0.0901733	0.0437638	8.01023	8.18393	7.8005	7.34551	7.52741	7.6679
ENSBTAG00000026394	ENSBTAT00000070572	0.20154	0.0109514	9.78465	11.4773	10.0503	8.63903	8.72797	9.86281
ENSBTAG00000016331	ENSBTAT00000080110	-0.200601	0.157371	15.4425	19.0652	17.7267	20.5135	18.3415	21.1717
ENSBTAG00000005455	ENSBTAT00000007177	-0.0403412	0.820303	35.1169	33.5522	34.7938	34.2154	36.5907	35.5908
ENSBTAG00000003577	ENSBTAT00000004656	-0.0482378	0.909028	75.7726	79.5568	81.2148	84.8512	85.4179	74.3178
ENSBTAG00000020387	ENSBTAT00000027175	-0.047967	0.911687	9.69741	9.12371	9.14827	10.0795	9.75343	9.08203
ENSBTAG00000018050	ENSBTAT00000024028	0.314176	1.71425e-05	11.5249	11.9903	11.8366	9.44664	9.04975	9.93745
ENSBTAG00000020043	ENSBTAT00000068574	-0.304982	0.00133033	9.68091	11.1322	10.5705	12.7579	13.4524	12.5611
ENSBTAG00000006126	ENSBTAT00000008061	-0.179386	0.125637	7.64825	8.13752	7.63571	8.14982	9.13771	9.235
ENSBTAG00000006541	ENSBTAT00000008593	0.766379	1.0541e-31	45.0977	41.599	44.4794	25.094	26.3493	25.6739
ENSBTAG00000019219	ENSBTAT00000025587	0.194124	0.01588	7.9205	9.15763	7.85552	8.02682	6.99596	6.77182
ENSBTAG00000032087	ENSBTAT00000072038	-0.142444	0.266228	28.1907	32.0928	28.518	33.1794	33.1421	31.6953
ENSBTAG00000032087	ENSBTAT00000072038	-0.142444	0.266228	28.1907	32.0928	28.518	33.1794	33.1421	31.6953
ENSBTAG00000012928	ENSBTAT00000017178	-0.629837	7.60391e-05	35.805	36.8153	38.743	62.6178	40.6504	69.0541
ENSBTAG00000021785	ENSBTAT00000068496	0.0322174	0.334928	8.6843	9.21287	9.58734	9.14936	8.42062	9.30757
ENSBTAG00000007952	ENSBTAT00000010451	0.195188	0.000802907	55.354	59.2397	55.3977	48.721	47.6439	52.1156
ENSBTAG00000044880	ENSBTAT00000062313	0.15716	1	0.145806	0.914082	0.630084	0.234178	0.302856	0.978514
ENSBTAG00000008412	ENSBTAT00000067736	0.0634981	0.21733	40.6169	40.0273	42.2853	35.6947	36.9607	44.981
ENSBTAG00000008412	ENSBTAT00000067736	0.0634981	0.21733	40.6169	40.0273	42.2853	35.6947	36.9607	44.981
ENSBTAG00000002083	ENSBTAT00000067784	0.92843	2.41502e-12	6.21744	4.53593	5.34755	3.46326	2.51466	2.48199
ENSBTAG00000002083	ENSBTAT00000083495	0.92843	2.41502e-12	6.21744	4.53593	5.34755	3.46326	2.51466	2.48199
ENSBTAG00000019517	ENSBTAT00000068399	-1.23182	2.22562e-24	3.76079	4.72561	3.77672	8.55619	9.92796	10.3174
ENSBTAG00000000781	ENSBTAT00000001039	0.235845	0.000145755	13.7979	14.1338	13.9941	11.7358	12.496	11.3711
ENSBTAG00000016139	ENSBTAT00000021482	-0.0473323	0.925316	33.2467	33.0867	33.2945	32.905	32.2797	37.766
ENSBTAG00000010659	ENSBTAT00000087199	-0.326908	0.000594494	7.23248	7.88263	8.02154	9.72344	10.3351	8.96225
ENSBTAG00000014465	ENSBTAT00000019232	-0.584346	1.7282e-15	706.18	719.476	756.116	1083.86	1110.86	1076.54
ENSBTAG00000001134	ENSBTAT00000001510	-0.235302	0.0185656	13.9007	12.1876	14.1251	15.5108	15.9706	15.8559
ENSBTAG00000001134	ENSBTAT00000001510	-0.235302	0.0185656	13.9007	12.1876	14.1251	15.5108	15.9706	15.8559
ENSBTAG00000001131	ENSBTAT00000068562	0.0559374	0.300154	3.79823	4.2897	3.78727	3.83589	3.66185	3.92583
ENSBTAG00000020528	ENSBTAT00000027347	0.335413	9.25715e-08	470.973	499.826	450.428	378.534	365.52	382.349
ENSBTAG00000016763	ENSBTAT00000022290	0.2795	0.000240326	11.5265	11.5403	11.0442	8.8864	9.02013	10.1968
ENSBTAG00000039720	ENSBTAT00000056434	0.362664	0.000470944	7.34544	7.26372	7.3681	5.77486	5.78264	5.53481
ENSBTAG00000022825	ENSBTAT00000055646	0.485075	1.0071e-05	43.9878	45.5689	42.654	28.0553	27.3052	39.0987
ENSBTAG00000007370	ENSBTAT00000009691	-0.00679028	0.534012	11.9227	11.8917	11.942	12.3872	11.8978	11.6401
ENSBTAG00000003191	ENSBTAT00000004145	-0.421351	1.05388e-07	47.7494	49.8288	48.3177	64.3474	67.1497	63.884
ENSBTAG00000012197	ENSBTAT00000016176	0.0087427	0.5724	4.12994	4.46056	4.13242	4.78133	3.95483	3.90989
ENSBTAG00000014502	ENSBTAT00000019280	-0.173586	0.296032	2.54893	2.78984	2.62331	2.97883	3.04959	2.95168
ENSBTAG00000053202	ENSBTAT00000071564	-0.481322	1	0.034808	0.104418	0.078807	0.060927	0.130928	0.112524
ENSBTAG00000007474	ENSBTAT00000009832	-0.395324	3.86235e-07	44.688	43.9123	44.6325	57.5579	59.6287	58.0462
ENSBTAG00000003607	ENSBTAT00000004699	0.465219	6.09971e-10	12.9059	13.007	12.3528	9.23179	8.95616	9.5302
ENSBTAG00000046514	ENSBTAT00000063610	0.112671	0.065047	12.8475	12.6574	13.0459	10.9961	11.5582	13.1004
ENSBTAG00000013478	ENSBTAT00000017923	0.841268	1.73589e-38	66.3181	68.3173	65.0438	37.151	37.1571	37.1435
ENSBTAG00000018604	ENSBTAT00000024759	0.153357	0.0797526	2.39418	2.87363	2.49402	2.3376	2.29465	2.34685
ENSBTAG00000005015	ENSBTAT00000006601	0.0952946	0.0450029	20.9592	21.7769	21.125	19.6934	19.3093	20.7765
ENSBTAG00000007427	ENSBTAT00000078404	-0.024148	0.67385	12.0782	12.7377	12.0822	12.492	11.9841	13.0447
ENSBTAG00000007427	ENSBTAT00000078404	-0.024148	0.67385	12.0782	12.7377	12.0822	12.492	11.9841	13.0447
ENSBTAG00000007435	ENSBTAT00000009775	-0.137722	0.245282	27.4217	27.1133	28.1731	31.5743	30.0318	29.3867
ENSBTAG00000006017	ENSBTAT00000007904	0.332655	4.68168e-07	19.4657	18.6946	19.8193	14.8538	14.9183	16.268
ENSBTAG00000002500	ENSBTAT00000003249	-0.041435	0.931951	2.03401	1.89514	2.05888	2.02795	2.30522	1.82933
ENSBTAG00000021065	ENSBTAT00000075709	-0.0213243	0.83689	1.83	2.09829	1.79831	1.53888	1.74138	2.5316
ENSBTAG00000002717	ENSBTAT00000003517	0.73791	7.9031e-07	1.45118	1.5185	1.48	0.887872	0.894772	0.885417
ENSBTAG00000009715	ENSBTAT00000012818	0.0684737	0.0783213	10.5062	9.7162	10.0234	9.43024	9.69968	9.71388
ENSBTAG00000001017	ENSBTAT00000001346	0.117385	0.0236627	12.7406	11.4585	12.9104	11.5422	11.7131	10.9543
ENSBTAG00000021574	ENSBTAT00000070531	0.141263	0.0140611	12.7215	14.3761	13.4485	12.4594	12.8066	11.4983
ENSBTAG00000007441	ENSBTAT00000009785	0.0582837	0.0999085	31.8537	32.4638	32.7059	31.9156	31.6759	29.5904
ENSBTAG00000010786	ENSBTAT00000014288	0.706076	6.1798e-19	2.49101	2.46732	2.38303	1.41674	1.53186	1.55154
ENSBTAG00000010786	ENSBTAT00000079974	0.706076	6.1798e-19	2.49101	2.46732	2.38303	1.41674	1.53186	1.55154
ENSBTAG00000010957	ENSBTAT00000056613	-0.0485744	0.944629	4.4418	4.68535	4.63764	4.61561	4.54866	5.07186
ENSBTAG00000009439	ENSBTAT00000012421	-0.183783	0.268432	3.17254	3.02585	3.85991	3.78654	4.24562	3.39263
ENSBTAG00000009439	ENSBTAT00000012421	-0.183783	0.268432	3.17254	3.02585	3.85991	3.78654	4.24562	3.39263
ENSBTAG00000029843	ENSBTAT00000042222	0	1	NA	NA	NA	NA	NA	NA
ENSBTAG00000016918	ENSBTAT00000038965	0.00939667	0.337425	63.162	62.7916	61.7373	64.0335	63.674	58.7649
ENSBTAG00000014314	ENSBTAT00000056415	0.0949963	0.126473	5.88577	5.88566	5.56902	5.51286	5.3992	5.32336
ENSBTAG00000015702	ENSBTAT00000020847	0.633504	0.000933429	1.06076	1.32694	1.24719	0.843065	0.702311	0.797703
ENSBTAG00000003580	ENSBTAT00000004659	-0.711477	4.5614e-06	1.15196	1.20502	1.31257	2.02966	1.85651	2.12263
ENSBTAG00000021065	ENSBTAT00000075709	-0.0213243	0.83689	1.83	2.09829	1.79831	1.53888	1.74138	2.5316
ENSBTAG00000009719	ENSBTAT00000012820	0.122871	0.112581	6.7699	6.9318	6.3492	5.64676	6.22576	6.54139
ENSBTAG00000004612	ENSBTAT00000010450	0.463036	1	0.011514	0.010428	0	0.013612	0.002306	0
ENSBTAG00000004612	ENSBTAT00000010450	0.463036	1	0.011514	0.010428	0	0.013612	0.002306	0
ENSBTAG00000002528	ENSBTAT00000061515	0.147386	0.00283454	145.607	146.84	153.643	140.149	132.949	129.671
ENSBTAG00000012444	ENSBTAT00000016524	0.161442	0.00289791	34.8219	33.8695	35.5639	29.2734	31.364	32.5804
ENSBTAG00000002444	ENSBTAT00000003173	-4.31747	8.33287e-147	0.771586	1.19979	0.71225	18.6798	18.3032	16.5237
ENSBTAG00000008585	ENSBTAT00000011327	0.166697	0.00445377	12.1961	11.3964	11.9977	10.1562	10.263	11.2874
ENSBTAG00000009387	ENSBTAT00000012351	2.08587	2.13606e-169	35.0293	34.007	33.6157	7.47514	8.495	8.20997
ENSBTAG00000013943	ENSBTAT00000018525	0.13481	0.275068	1.95153	1.78089	1.69503	1.57919	1.57958	1.7845
ENSBTAG00000017831	ENSBTAT00000039803	0.068753	0.0799677	20.8243	19.4635	21.4609	19.2199	19.8726	19.7825
ENSBTAG00000000978	ENSBTAT00000001294	-0.094588	0.642076	10.5958	11.0453	10.9681	11.6556	11.5423	11.6209
ENSBTAG00000027626	ENSBTAT00000069302	0.101799	0.0264734	33.0213	34.0708	34.6932	31.6402	32.8952	30.3153
ENSBTAG00000000357	ENSBTAT00000084626	0.688769	1.1594e-05	0.791528	0.960286	0.768601	0.581077	0.466183	0.516363
ENSBTAG00000015457	ENSBTAT00000070664	0.0793087	0.0911859	23.2527	25.1426	22.243	21.6722	21.5662	23.6216
ENSBTAG00000010694	ENSBTAT00000079722	0.196353	0.000481889	24.0952	25.6564	23.9335	21.8693	20.9496	21.4901
ENSBTAG00000017509	ENSBTAT00000023273	1.01466	9.89916e-37	22.7327	18.7512	23.0474	10.7727	10.5591	10.6076
ENSBTAG00000012657	ENSBTAT00000016807	0.18352	0.0023863	8.57143	9.42376	8.55565	7.5874	7.72234	8.06965
ENSBTAG00000019313	ENSBTAT00000025717	0.214035	0.000250646	12.0221	11.7985	11.7271	9.84773	11.0687	9.73005
ENSBTAG00000019313	ENSBTAT00000025717	0.214035	0.000250646	12.0221	11.7985	11.7271	9.84773	11.0687	9.73005
ENSBTAG00000020940	ENSBTAT00000054137	0.0760711	0.0584857	49.1834	49.1271	46.1938	45.4047	47.058	44.6196
ENSBTAG00000018707	ENSBTAT00000065403	1.83714	4.9321e-74	7.38595	6.00756	7.44719	2.00517	1.99801	1.82961
ENSBTAG00000007244	ENSBTAT00000009531	1.14196	2.18572e-67	222.3	219.61	211.587	96.3223	98.14	101.666
ENSBTAG00000005666	ENSBTAT00000007444	-0.249524	0.193823	2.44988	2.43064	1.80837	2.72152	2.49157	2.73876
ENSBTAG00000021499	ENSBTAT00000028655	-0.146046	0.183258	260.847	256.389	254.152	275.825	282.983	294.758
ENSBTAG00000021132	ENSBTAT00000026992	0.693491	9.73808e-27	33.3324	32.9726	32.136	19.8551	21.0783	19.9382
ENSBTAG00000033008	ENSBTAT00000028159	0.884535	6.31481e-10	3.8792	3.11991	4.40889	1.95816	2.23968	1.98144
ENSBTAG00000013187	ENSBTAT00000017554	-0.0603982	0.955645	15.7137	16.9628	15.5332	16.5278	16.3142	17.4288
ENSBTAG00000013259	ENSBTAT00000017638	0.139562	0.0158616	6.87423	7.861	7.30222	6.84377	6.93083	6.23088
ENSBTAG00000019623	ENSBTAT00000026142	0.338781	0.0502286	0.863287	0.950267	0.915054	0.556042	0.825719	0.775774
ENSBTAG00000010505	ENSBTAT00000013891	-0.220988	0.0323715	9.13423	9.22462	9.65346	11.2135	11.0238	10.4119
ENSBTAG00000021604	ENSBTAT00000078203	-0.0567865	0.996015	7.23182	7.40442	7.2053	8.08345	6.93192	7.70303
ENSBTAG00000050061	ENSBTAT00000081145	-1.18034	1.77862e-28	3.39401	3.4387	3.51581	7.84579	7.66149	7.94562
ENSBTAG00000006910	ENSBTAT00000009073	0.194601	0.00110676	26.0097	26.3076	26.3937	23.688	21.5682	23.5226
ENSBTAG00000009484	ENSBTAT00000080980	0.036242	0.478135	3.51125	3.79648	3.4806	3.61567	3.21636	3.68867
ENSBTAG00000013240	ENSBTAT00000017614	-0.304621	0.00382053	106.506	119.137	124.039	150.772	130.264	150.854
ENSBTAG00000015663	ENSBTAT00000076094	-0.331521	5.41126e-05	52.9436	55.1105	54.204	68.8877	67.5209	67.7673
ENSBTAG00000016560	ENSBTAT00000022027	-0.115165	0.631061	3.83329	3.3491	3.90758	4.01694	3.91948	4.07512
ENSBTAG00000012512	ENSBTAT00000072988	0.131008	0.0758352	10.0477	11.8842	10.546	9.60132	9.70407	10.3531
ENSBTAG00000008645	ENSBTAT00000036417	-0.215318	0.118182	8.58909	8.52797	8.43294	9.1139	9.25633	11.2923
ENSBTAG00000007061	ENSBTAT00000009284	0.124627	0.131364	5.70901	5.39522	4.67521	5.13724	4.48332	4.85299
ENSBTAG00000015479	ENSBTAT00000020585	0.317014	1.33906e-05	25.1377	25.1243	23.8182	20.7431	18.7301	19.9931
ENSBTAG00000054514	ENSBTAT00000085306	0.291164	0.506899	141.178	39.7987	41.4621	123.638	29.8596	28.2881
ENSBTAG00000006740	ENSBTAT00000045467	-0.0069235	0.49479	34.8083	37.0783	34.1082	35.536	35.2765	35.6922
ENSBTAG00000013884	ENSBTAT00000018435	-0.431679	0.00053	2.63204	2.68578	2.81483	3.58932	3.40828	3.97174
ENSBTAG00000021456	ENSBTAT00000028603	0.0435084	0.47938	3.957	3.16175	3.06361	2.83016	3.52498	3.52473
ENSBTAG00000003094	ENSBTAT00000004027	-0.0374556	0.798355	19.2874	18.2468	18.6176	18.8608	19.2485	19.5194
ENSBTAG00000009026	ENSBTAT00000011884	0.105873	0.0650528	13.4633	14.3747	12.161	11.7816	12.2105	13.1767
ENSBTAG00000009026	ENSBTAT00000011884	0.105873	0.0650528	13.4633	14.3747	12.161	11.7816	12.2105	13.1767
ENSBTAG00000019334	ENSBTAT00000025752	-0.255237	0.0332578	6.05435	6.72816	6.19733	7.53491	7.94766	7.17049
ENSBTAG00000019334	ENSBTAT00000025752	-0.255237	0.0332578	6.05435	6.72816	6.19733	7.53491	7.94766	7.17049
ENSBTAG00000022244	ENSBTAT00000074398	-0.236571	0.0250935	14.758	13.5868	13.7928	16.0293	16.023	17.5936
ENSBTAG00000004343	ENSBTAT00000005683	-0.146773	0.467525	3.71848	3.80962	3.91356	3.74534	4.41277	4.50884
ENSBTAG00000031688	ENSBTAT00000000541	-0.046815	0.926425	34.2833	35.5571	31.7311	35.8737	30.7412	38.3066
ENSBTAG00000003369	ENSBTAT00000004370	0.283722	0.176577	0.312215	0.361492	0.310244	0.24989	0.214801	0.343594
ENSBTAG00000044032	ENSBTAT00000061554	-0.00367319	0.447095	16.6555	16.5301	16.7847	16.2113	17.0614	16.825
ENSBTAG00000031590	ENSBTAT00000018426	-0.18393	0.244107	4.14997	4.33539	4.04247	4.86356	4.65721	4.71053
ENSBTAG00000017690	ENSBTAT00000023529	0.144618	0.44176	0.52227	0.377087	0.360589	0.301514	0.463804	0.374453
ENSBTAG00000010478	ENSBTAT00000013841	-0.114093	0.599749	12.1329	12.1662	11.0699	11.6669	12.3778	14.235
ENSBTAG00000000292	ENSBTAT00000000367	0.162476	0.0141724	7.40295	7.48991	7.57575	6.86616	6.24199	6.96734
ENSBTAG00000022188	ENSBTAT00000070096	0.442922	3.66533e-12	17.7739	17.8034	19.0347	12.7974	13.8608	13.5167
ENSBTAG00000010777	ENSBTAT00000084728	-0.24811	0.00495625	41.3409	42.1014	40.4528	49.5431	48.64	48.9609
ENSBTAG00000010777	ENSBTAT00000084728	-0.24811	0.00495625	41.3409	42.1014	40.4528	49.5431	48.64	48.9609
ENSBTAG00000013066	ENSBTAT00000085576	-0.443071	1.80616e-07	163.16	167.283	146.128	215.607	217.401	214.887
ENSBTAG00000013066	ENSBTAT00000085576	-0.443071	1.80616e-07	163.16	167.283	146.128	215.607	217.401	214.887
ENSBTAG00000013066	ENSBTAT00000084689	-0.443071	1.80616e-07	163.16	167.283	146.128	215.607	217.401	214.887
ENSBTAG00000010447	ENSBTAT00000013787	-0.0751379	0.884197	3.04357	3.55299	3.00026	3.49503	3.02586	3.58899
ENSBTAG00000007622	ENSBTAT00000010022	0.187272	0.00179737	192.78	204.967	193.517	168.21	164.337	186.739
ENSBTAG00000008237	ENSBTAT00000010835	0.191625	0.0128134	22.421	22.9553	22.2319	17.4267	18.7784	22.9939
ENSBTAG00000001229	ENSBTAT00000001624	0.40138	1.52835e-06	11.5428	11.4969	10.664	8.24407	7.99392	9.28023
ENSBTAG00000046869	ENSBTAT00000071430	-0.0318797	0.73838	31.1265	30.2373	31.2937	30.0872	32.0383	32.6023
ENSBTAG00000007847	ENSBTAT00000010324	0.16959	0.0260228	13.7852	11.9244	12.9559	10.7653	12.4514	11.1607
ENSBTAG00000018431	ENSBTAT00000024536	0.427863	3.27733e-08	2.86537	2.90424	2.94128	1.99349	2.35645	2.12541
ENSBTAG00000012169	ENSBTAT00000016141	0.215606	0.00287782	11.5289	11.5496	11.8771	9.84566	10.5468	9.71078
ENSBTAG00000015263	ENSBTAT00000020300	-0.0592269	0.971029	11.8995	12.7211	12.3479	13.3133	12.691	12.5134
ENSBTAG00000011865	ENSBTAT00000015748	-0.183527	0.0629642	30.3522	28.8312	30.2982	34.2153	33.6246	33.7803
ENSBTAG00000011872	ENSBTAT00000015756	0.00568261	0.495659	7.48844	7.04243	6.86113	6.90041	7.18584	7.22167
ENSBTAG00000016950	ENSBTAT00000022546	-0.0663036	0.921488	30.8782	36.892	31.9423	31.4845	33.4227	39.4948
ENSBTAG00000007827	ENSBTAT00000010294	-1.26676	7.99011e-30	3.50501	3.8859	3.26775	8.41918	8.38369	8.84403
ENSBTAG00000001032	ENSBTAT00000001373	0.71813	7.66532e-09	3.58661	2.82104	3.24721	1.88246	1.94997	2.03661
ENSBTAG00000001035	ENSBTAT00000001376	-0.0666986	0.876677	44.3333	45.138	45.0679	48.0139	46.4805	46.4108
ENSBTAG00000002095	ENSBTAT00000002705	-0.0458043	0.907541	7.56003	7.91667	7.51486	7.59175	7.78978	8.35171
ENSBTAG00000009736	ENSBTAT00000012838	0.163722	0.0499318	1.69937	1.95472	1.96591	1.69887	1.75376	1.56446
ENSBTAG00000005076	ENSBTAT00000006699	0.367131	2.26148e-07	18.2476	20.9721	18.5056	14.6696	14.9638	15.1224
ENSBTAG00000006740	ENSBTAT00000045467	-0.0069235	0.49479	34.8083	37.0783	34.1082	35.536	35.2765	35.6922
ENSBTAG00000006747	ENSBTAT00000008880	0.494477	5.21856e-12	12.8915	13.1798	12.195	8.80236	8.7019	9.65789
ENSBTAG00000013895	ENSBTAT00000018453	0.1162	0.0179864	21.9437	23.2072	21.7437	20.0446	21.0084	20.6649
ENSBTAG00000044073	ENSBTAT00000061487	-0.55706	6.14048e-06	45.362	57.999	41.3683	70.4308	67.4961	75.0087
ENSBTAG00000017681	ENSBTAT00000023514	-0.029404	0.859445	1.50004	1.36645	1.16344	1.45751	1.47422	1.18119
ENSBTAG00000010994	ENSBTAT00000014587	0.729366	2.51586e-24	31.5045	31.3548	31.9806	18.3893	18.4668	20.3484
ENSBTAG00000021777	ENSBTAT00000067204	0.39254	0.0200195	1.32682	1.20833	1.04967	1.03133	0.826829	0.872715
ENSBTAG00000001193	ENSBTAT00000001581	0.443272	9.30039e-06	7.97456	8.49704	7.43118	5.27147	5.7933	6.51489
ENSBTAG00000047793	ENSBTAT00000065912	0.283436	0.000801367	10.6389	10.2394	10.7622	8.76485	8.80208	8.42988
ENSBTAG00000047495	ENSBTAT00000065583	-0.261303	0.00296554	59.8633	60.321	60.2075	70.4596	72.4994	73.2516
ENSBTAG00000022158	ENSBTAT00000029890	1.51204	8.91833e-61	18.9324	18.5665	19.5102	7.25364	6.31981	6.41478
ENSBTAG00000010447	ENSBTAT00000013787	-0.0751379	0.884197	3.04357	3.55299	3.00026	3.49503	3.02586	3.58899
ENSBTAG00000010880	ENSBTAT00000014452	0.695821	1.57042e-11	26.2407	29.3693	27.3815	16.4568	14.7116	20.0671
ENSBTAG00000009915	ENSBTAT00000080787	-0.264605	0.00882602	15.1493	14.9396	15.6128	16.9929	17.9189	19.99
ENSBTAG00000019569	ENSBTAT00000026074	0.532027	2.80879e-14	43.296	48.424	42.7768	30.6292	30.8565	31.53
ENSBTAG00000005144	ENSBTAT00000029870	0.254828	0.00909546	6.70835	8.42243	6.83779	5.92159	6.14924	6.34074
ENSBTAG00000022147	ENSBTAT00000073493	1.3271	7.62506e-39	8.25598	9.03484	7.53485	3.38557	3.18009	3.32907
ENSBTAG00000046359	ENSBTAT00000066052	-0.0770434	0.796767	5.32851	4.80289	5.06418	5.34411	5.31388	5.37113
ENSBTAG00000042690	ENSBTAT00000059682	-0.736271	1	1.92036	1.34475	1.97339	1.92816	4.22084	2.57764
